# Supplementary material for: Multimodal deep learning model for predicting homologous recombination deficiency in prostate cancer: an international multi-cohort study
Source: Research Square preprint supplement (doi:10.21203/rs.3.rs-6488233/v1), 2025-05-07
Supplement: Supplementary file 1 [file 2fb6710a4ebca7afb870bd88.xlsx]

## Sheet: Supplementary Table 6
ID	log_sigma_2_0_mm_3D_firstorder_10Percentile	log_sigma_2_0_mm_3D_firstorder_90Percentile	log_sigma_2_0_mm_3D_firstorder_Energy	log_sigma_2_0_mm_3D_firstorder_Entropy	log_sigma_2_0_mm_3D_firstorder_InterquartileRange	log_sigma_2_0_mm_3D_firstorder_Kurtosis	log_sigma_2_0_mm_3D_firstorder_Maximum	log_sigma_2_0_mm_3D_firstorder_Mean	log_sigma_2_0_mm_3D_firstorder_MeanAbsoluteDeviation	log_sigma_2_0_mm_3D_firstorder_Median	log_sigma_2_0_mm_3D_firstorder_Minimum	log_sigma_2_0_mm_3D_firstorder_Range	log_sigma_2_0_mm_3D_firstorder_RobustMeanAbsoluteDeviation	log_sigma_2_0_mm_3D_firstorder_RootMeanSquared	log_sigma_2_0_mm_3D_firstorder_Skewness	log_sigma_2_0_mm_3D_firstorder_TotalEnergy	log_sigma_2_0_mm_3D_firstorder_Uniformity	log_sigma_2_0_mm_3D_firstorder_Variance	log_sigma_2_0_mm_3D_glcm_Autocorrelation	log_sigma_2_0_mm_3D_glcm_ClusterProminence	log_sigma_2_0_mm_3D_glcm_ClusterShade	log_sigma_2_0_mm_3D_glcm_ClusterTendency	log_sigma_2_0_mm_3D_glcm_Contrast	log_sigma_2_0_mm_3D_glcm_Correlation	log_sigma_2_0_mm_3D_glcm_DifferenceAverage	log_sigma_2_0_mm_3D_glcm_DifferenceEntropy	log_sigma_2_0_mm_3D_glcm_DifferenceVariance	log_sigma_2_0_mm_3D_glcm_Id	log_sigma_2_0_mm_3D_glcm_Idm	log_sigma_2_0_mm_3D_glcm_Idmn	log_sigma_2_0_mm_3D_glcm_Idn	log_sigma_2_0_mm_3D_glcm_Imc1	log_sigma_2_0_mm_3D_glcm_Imc2	log_sigma_2_0_mm_3D_glcm_InverseVariance	log_sigma_2_0_mm_3D_glcm_JointAverage	log_sigma_2_0_mm_3D_glcm_JointEnergy	log_sigma_2_0_mm_3D_glcm_JointEntropy	log_sigma_2_0_mm_3D_glcm_MaximumProbability	log_sigma_2_0_mm_3D_glcm_SumEntropy	log_sigma_2_0_mm_3D_glcm_SumSquares	log_sigma_2_0_mm_3D_gldm_DependenceEntropy	log_sigma_2_0_mm_3D_gldm_DependenceNonUniformity	log_sigma_2_0_mm_3D_gldm_DependenceNonUniformityNormalized	log_sigma_2_0_mm_3D_gldm_DependenceVariance	log_sigma_2_0_mm_3D_gldm_GrayLevelNonUniformity	log_sigma_2_0_mm_3D_gldm_GrayLevelVariance	log_sigma_2_0_mm_3D_gldm_HighGrayLevelEmphasis	log_sigma_2_0_mm_3D_gldm_LargeDependenceEmphasis	log_sigma_2_0_mm_3D_gldm_LargeDependenceHighGrayLevelEmphasis
DP712198-1.nii.gz	-141.871	32.4954	1.15836e+08	5.77831	87.1214	3.94825	159.89	-49.6649	54.7351	-42.531	-387.866	547.755	36.6755	260.118	-0.627684	9.26687e+08	0.021879	4993.51	4799.61	1.47625e+06	-9444.63	623.841	151.684	0.60692	9.35906	4.61272	61.3916	0.191467	0.108291	0.988074	0.925396	-0.225403	0.960738	0.115878	68.4218	0.00103248	10.2087	0.00343552	6.54585	193.881	7.23584	637.799	0.372546	0.771263	37.4568	199.797	4900.13	3.76869	18366.6
DP712198-2.nii.gz	-34.3264	23.352	1.94754e+08	4.24181	26.8897	5.29048	87.0716	-4.81645	18.0831	-2.93329	-127.329	214.401	11.5683	296.188	-0.815656	1558034639	0.0666318	593.85	669.521	25270.8	-494.057	67.0434	19.3138	0.549175	3.21529	3.20557	8.79388	0.369532	0.28383	0.990526	0.93529	-0.113623	0.769476	0.292429	25.6434	0.00669633	7.84906	0.0177743	4.96623	21.5893	6.85848	343.6	0.154775	4.18113	147.923	23.8267	675.456	16.1802	11206
DP715676-1.nii.gz	-166.773	44.2101	1.12521e+08	6.07125	113.337	3.29469	201.939	-63.0768	66.4852	-64.7535	-416.315	618.254	45.7608	251.494	-0.0889877	9.00165e+08	0.0174464	7116.75	5371.34	2.44605e+06	-552.482	883.812	223.694	0.595174	11.5622	4.88487	84.5287	0.166896	0.0896266	0.98634	0.919463	-0.255164	0.97615	0.0933422	72.1543	0.000791272	10.5543	0.00275911	6.82614	276.876	7.40465	739.947	0.415934	0.751481	31.0371	284.932	5452.51	3.40697	18733.5
DP715676-2.nii.gz	-63.0795	52.5563	2.70479e+08	5.30566	56.7946	9.49971	163.472	-5.32454	38.8971	1.2178	-376.194	539.666	23.8129	299.866	-1.65257	2163830697	0.0323791	3086.2	5788.61	1.27855e+06	-11305.6	346.171	93.6537	0.571574	6.9195	4.24563	44.6751	0.245153	0.156793	0.99247	0.943191	-0.143064	0.875124	0.162385	75.6668	0.00172332	9.71656	0.00571174	6.01048	109.956	7.27535	783.272	0.260396	1.68814	97.3963	123.607	5812.67	6.7746	40624.5
N132039-1.nii.gz	-116.591	15.9796	1.73206e+08	5.45922	65.014	6.09676	142.463	-47.2178	43.9032	-38.7701	-351.38	493.843	27.7011	259.808	-1.20277	1385647517	0.0287327	3601.51	3904.61	1.30054e+06	-12666.3	459.619	107.181	0.618469	7.14815	4.27357	54.4559	0.244771	0.156659	0.990017	0.937253	-0.188453	0.930291	0.163093	61.7776	0.00154121	9.84011	0.00558588	6.24741	141.7	7.36223	701.843	0.273516	1.55409	73.728	144.066	3994.35	6.28293	26508.2
N132039-2.nii.gz	-13.2462	24.8782	1.67556e+08	3.5501	18.8234	3.01036	60.1234	4.58854	11.5345	2.96699	-38.6627	98.7861	7.99866	304.932	0.397356	1340448989	0.099634	209.239	88.4034	1987.04	62.8834	25.5896	5.67367	0.635584	1.81085	2.43393	2.31053	0.478922	0.412125	0.987707	0.924578	-0.135552	0.761429	0.405992	9.13349	0.0153764	6.50799	0.0384845	4.32649	7.81583	6.6071	213.84	0.118668	6.56738	179.541	8.42017	97.1687	30.5893	2535.31
N132151-1.nii.gz	-240.915	17.0875	4.87433e+07	6.25211	137.7	2.93741	127.99	-107.18	79.9637	-102.351	-487.705	615.696	56.5882	217.014	-0.356047	3.89947e+08	0.0150417	9915.46	6207.69	4.39667e+06	-15876.2	1222.95	410.525	0.497574	15.8992	5.30549	150.889	0.131167	0.0637452	0.975382	0.892953	-0.36393	0.994688	0.064799	77.4879	0.000910853	10.2338	0.00335721	6.95182	408.369	7.232	528.407	0.510538	0.48536	15.5681	397.123	6338.48	2.54396	17028.9
N132151-2.nii.gz	-28.2057	27.862	4.03223e+07	4.08629	28.419	2.89426	63.9707	2.67681	16.8417	4.15236	-56.2459	120.217	11.6458	303.414	-0.153385	3.22578e+08	0.0683785	446.779	181.278	7222.18	-28.4535	49.9956	20.8789	0.410872	3.49882	3.26151	8.38518	0.347953	0.258495	0.969936	0.885738	-0.164499	0.856882	0.2607	13.1906	0.00714958	7.47578	0.0198331	4.76437	17.7186	6.25467	83.8128	0.191353	2.89564	29.9498	17.8397	187.434	11.2237	2244.78
N140033-1.nii.gz	-255.866	95.2177	1.93009e+08	6.73595	180.068	3.68888	288.647	-73.3739	107.701	-66.1282	-844.492	1133.14	75.1146	264.396	-0.444885	1544069434	0.0109256	18546	24259.6	1.9136e+07	-44568.9	2358.67	679.996	0.552542	19.9324	5.66402	269.692	0.113006	0.0513227	0.987478	0.923189	-0.285347	0.989179	0.0543895	154.402	0.000374605	11.5625	0.00140816	7.52313	759.666	7.68407	1563	0.5661	0.348606	30.1655	741.416	24709.6	2.15321	54361
N140033-2.nii.gz	-15.0753	25.2008	1.82901e+08	3.76238	19.1215	4.31238	64.5485	3.69734	12.6388	3.03566	-80.6512	145.2	8.16139	304.162	-0.0203257	1463206156	0.09226	282.224	328.072	4021.88	11.437	30.4529	10.1834	0.495062	2.40185	2.81095	4.28199	0.423082	0.343579	0.989186	0.929472	-0.0969523	0.689271	0.338137	17.9722	0.0120686	6.99322	0.0290096	4.44346	10.1591	6.615	260.022	0.131523	5.01282	182.398	11.4637	344.06	22.5154	7555.37
N140320-1.nii.gz	-262.993	-32.4672	7.91931e+06	5.76304	114.085	2.36451	50.6114	-138.444	68.0916	-126.262	-331.445	382.057	49.7105	181.651	-0.291302	6.33544e+07	0.0214236	6896.84	1496.88	1.43778e+06	-1802.99	784.368	380.795	0.348118	15.3502	4.94774	132.131	0.138495	0.0704798	0.946701	0.848391	-0.60865	0.999467	0.0696858	37.3569	0.0044531	7.87738	0.00980039	5.99684	291.291	6.29061	130.683	0.544514	0.384375	5.14167	275.891	1861.26	2.275	4322.07
N140320-2.nii.gz	-39.6657	62.3055	1.56395e+07	4.79402	56.8102	3.18001	134.403	10.8907	32.7613	7.77618	-56.9198	191.322	23.0481	313.626	0.680015	1.25116e+08	0.0406234	1708.3	256.498	91662.4	1048.42	176.159	36.4375	0.64401	4.75741	3.44165	11.9337	0.279536	0.183313	0.977681	0.89726	-0.501364	0.994901	0.19103	14.8474	0.00914172	6.92457	0.0217794	5.13799	53.1491	5.94315	53.5409	0.336735	0.655591	6.45912	68.651	284.686	4.38365	1051.47
N140627-1.nii.gz	-227.383	24.4256	6.59388e+07	6.19545	128.174	2.78064	141.287	-93.23	76.2636	-87.9607	-404.149	545.436	53.9724	227.324	-0.352683	5.27511e+08	0.0156777	8922.38	4147.01	3.37366e+06	-14093.1	1089.97	302.23	0.564225	13.4164	5.10255	117.8	0.149662	0.0764007	0.976998	0.897831	-0.309621	0.98893	0.078464	62.8486	0.000823577	10.424	0.00284062	6.9172	348.049	7.3598	585.955	0.459212	0.655988	20.0047	357.133	4307.89	3.02508	13511.5
N140627-2.nii.gz	-26.0948	15.2658	9.37127e+07	3.83057	21.6804	4.71408	40.1335	-5.29342	13.6313	-4.24148	-90.2275	130.361	8.96038	295.253	-0.732327	7.49702e+08	0.0862191	322.651	355.698	4371.3	-80.0324	32.6683	11.7332	0.467607	2.53619	2.87726	5.17054	0.412666	0.332303	0.986057	0.921611	-0.113406	0.739725	0.335908	18.7205	0.0110236	7.0217	0.0273187	4.49405	11.1004	6.55056	151.275	0.140721	5.59217	92.6856	13.1468	353.146	20.0605	7219.22
N141022-1.nii.gz	-29.7866	8.91696	1.795e+08	3.75708	18.753	5.77414	71.2626	-9.06466	12.6859	-8.59579	-80.1642	151.427	7.9178	291.462	0.318818	1435998055	0.0958309	306.818	240.461	6314.53	-10.8533	34.417	10.3086	0.535664	2.3212	2.78162	4.73058	0.440296	0.367044	0.990407	0.935912	-0.123948	0.752416	0.362967	15.3109	0.0130246	6.95339	0.0329535	4.48928	11.1814	6.61189	287.969	0.136285	5.48893	202.491	12.4474	258.49	22.0118	5531.58
N141022-2.nii.gz	-11.2769	24.561	2.94239e+08	3.5928	17.1952	13.1338	60.2112	5.70766	11.3919	5.61218	-158.628	218.839	7.3367	306.115	-1.14203	2353910081	0.103625	249.438	1134.52	7301.1	-105.198	25.6552	9.48551	0.455809	2.23715	2.72263	4.38778	0.439728	0.363668	0.995495	0.95437	-0.0832343	0.641041	0.357447	33.6225	0.0144008	6.74007	0.0349171	4.27557	8.78518	6.44586	418.585	0.133307	5.2792	325.382	9.97468	1141.85	22.0057	24924
N141189-1.nii.gz	-160.624	36.9485	2.24313e+07	5.72811	106.954	2.54303	89.5184	-63.0515	60.2913	-61.2199	-266.933	356.451	43.3598	248.243	-0.231294	1.7945e+08	0.0212082	5479.82	1812.73	1.27498e+06	-1698.85	736.263	184.118	0.596074	10.9091	4.61939	58.8437	0.163302	0.0853044	0.96764	0.876126	-0.505688	0.998252	0.0895541	40.9213	0.00288475	8.53183	0.00711542	6.32319	230.095	6.6119	177.082	0.48649	0.39642	7.71978	219.275	1975.67	2.51648	5064.84
N141189-2.nii.gz	-26.3831	36.4837	1.29984e+07	4.15511	37.8598	2.27491	65.6021	3.79291	19.5776	2.38516	-48.9566	114.559	14.81	304.706	0.113564	1.03987e+08	0.0609184	555.782	131.966	9613.23	107.131	63.6043	23.8197	0.45536	3.8477	3.23467	8.45395	0.314082	0.219057	0.96317	0.871045	-0.354236	0.971662	0.239864	11.0449	0.0103814	6.76684	0.0239931	4.67183	21.856	5.49405	38.4571	0.274694	1.10286	8.52857	22.4867	148.407	5.94286	907.464
N141421-1.nii.gz	-438.242	-127.238	992577	5.29024	135.937	2.55072	-32.1332	-254.865	91.8528	-241.196	-497.4	465.267	62.4079	122.634	-0.293945	7.94062e+06	0.0289256	13001.9	2082.08	3.87804e+06	-15558.3	1205.33	828.144	0.203587	22.7852	4.42745	269.912	0.104354	0.04718	0.924672	0.821799	-0.810627	0.999841	0.0506549	44.4809	0.0162777	5.99414	0.0223821	4.80379	508.368	5.41546	43.9394	0.665748	0.167126	1.90909	517.704	2970.95	1.63636	4186.05
N141421-2.nii.gz	-4.03265	25.3327	7.95461e+06	3.14146	13.8024	2.92133	35.9637	11.2593	8.82474	11.0226	-20.385	56.3488	5.91638	311.46	0.0221298	6.36369e+07	0.127008	125.076	68.6874	440.022	-2.20548	12.7583	7.27651	0.261309	2.19292	2.40093	2.22064	0.414485	0.331088	0.961048	0.864423	-0.258044	0.891074	0.361037	8.19936	0.02744	5.41927	0.0580103	3.56536	5.00871	4.85562	19.4146	0.236764	1.41523	10.4146	5.14173	65.1098	9.14634	629.988
N141783-1.nii.gz	-126.36	-1.72261	3.15119e+07	5.18118	66.1824	2.551	64.2313	-67.0585	38.5484	-73.1934	-175.981	240.212	27.8593	237.64	0.285298	2.52095e+08	0.03159	2211.26	537.077	168357	1391.71	252.982	73.1931	0.550723	6.66919	4.07257	26.1943	0.237214	0.14837	0.972202	0.887711	-0.28679	0.972858	0.150517	22.1794	0.00271434	8.7671	0.00882185	5.83202	81.5439	6.76702	171.251	0.306901	1.44586	17.6272	88.748	621.464	5.63441	3289.17
N141783-2.nii.gz	-39.0815	17.5329	7.29783e+06	3.98601	30.0614	3.4159	35.4856	-9.59927	18.3004	-6.80058	-79.5502	115.036	12.5799	291.305	-0.56391	5.83826e+07	0.0746349	525.862	225.658	11246.8	-232.952	59.5818	17.3039	0.546431	3.27231	2.92293	6.22119	0.341029	0.246066	0.972658	0.887138	-0.471102	0.98533	0.265419	14.6635	0.0198008	5.84519	0.0446989	4.31452	19.2214	4.95762	24.1628	0.280963	1.08545	6.4186	21.2181	234.174	6.06977	1598.5
N142161-1.nii.gz	-166.55	22.907	3.68403e+07	5.79823	97.1495	3.15808	120.76	-67.6895	58.3873	-63.081	-345.416	466.176	40.4094	243.762	-0.369573	2.94723e+08	0.0209001	5451.71	3470.38	1.34417e+06	-4587.43	665.364	180.076	0.571719	10.2908	4.69784	71.0908	0.179957	0.0996118	0.981396	0.907785	-0.366265	0.992621	0.104024	57.8692	0.00162219	9.42149	0.00505267	6.47251	211.36	7.03394	240.994	0.388699	0.826129	12.9581	218.403	3462.44	3.71613	13521
N142161-2.nii.gz	-47.2282	14.1664	8.09483e+07	4.28728	33.7275	3.88578	64.7506	-15.8466	19.5616	-15.4927	-131.085	195.836	13.8166	285.228	-0.297321	6.47586e+08	0.0595389	611.847	596.799	15684.6	-139.406	70.2072	22.8749	0.506758	3.57804	3.31382	9.70235	0.346503	0.257711	0.986552	0.92231	-0.133115	0.810369	0.263403	24.1859	0.00540563	7.92288	0.0154618	5.02478	23.2705	6.65684	178.031	0.178926	3.06627	59.2412	24.4658	616.055	12.7668	7935.24
N142443-1.nii.gz	-176.697	-1.5221	1.38711e+07	5.60435	105.981	2.25341	54.6713	-85.6387	56.2192	-81.8452	-258.203	312.874	42.5581	224.589	-0.172002	1.10969e+08	0.0230479	4489.5	1199.46	545969	-981.098	485.628	207.044	0.404033	11.2282	4.67237	75.5266	0.171757	0.0957631	0.954895	0.860121	-0.52022	0.998361	0.10305	33.6081	0.00354335	8.23204	0.00897009	6.03682	173.168	6.43672	127.276	0.462823	0.619954	6.33818	179.48	1431.35	2.96364	3714.49
N142443-2.nii.gz	-64.2483	14.1693	1.41887e+07	4.37919	39.4695	3.42669	38.12	-18.7482	25.7008	-12.5831	-132.01	170.13	17.4159	283.129	-0.90569	113509691	0.0578697	1059.62	594.709	62558.2	-1506.67	141.713	34.575	0.607935	4.45263	3.47504	13.9536	0.308381	0.219278	0.97427	0.894808	-0.387012	0.981529	0.233712	23.8263	0.00952421	6.96899	0.0277396	4.98692	44.0719	5.68767	46.6271	0.26343	1.7126	10.2429	42.7933	608.266	7	4834.15
N143205-1.nii.gz	-232.618	5.28945	6.80646e+06	5.71341	119.234	3.29538	55.3868	-102.918	71.1155	-93.393	-382.517	437.903	46.9236	217.41	-0.784694	5.44517e+07	0.0221836	8425.71	3027.13	2.82566e+06	-19545.7	932.443	379.809	0.43678	14.8915	4.72985	135.489	0.142887	0.0743137	0.958851	0.86779	-0.691085	0.999776	0.0785448	53.7401	0.00627379	7.36654	0.012067	5.75642	328.063	6.12205	75.1806	0.522087	0.393326	3.19444	337.404	3573.75	2.36111	8475.1
N143205-2.nii.gz	-24.6194	35.3267	2.85771e+07	4.2066	32.6509	3.30731	59.8925	5.13043	19.1491	6.5872	-81.4351	141.328	12.9705	306.097	-0.374491	2.28617e+08	0.0632841	590.879	344.156	10576.2	-145.515	59.2721	26.7488	0.378899	3.83982	3.36481	11.5553	0.333416	0.2424	0.972137	0.891603	-0.228154	0.919095	0.243751	18.3307	0.00791662	7.29883	0.0212629	4.79911	21.5052	6.14472	63.859	0.209374	2.34266	19.3016	23.6401	366.072	9.51803	3552.33
N143265-1.nii.gz	-249.745	-0.676751	2.60813e+07	6.12864	136.641	2.40159	145.136	-125.525	76.0493	-130.091	-351.755	496.891	56.118	197.153	0.144527	2.0865e+08	0.0159404	8427.75	2107.34	2.45674e+06	9034.76	971.066	330.625	0.492882	14.3904	5.08896	114.703	0.136732	0.0666665	0.970426	0.882821	-0.422638	0.997054	0.0750991	44.1186	0.00137843	9.60152	0.00429944	6.69849	325.423	6.91763	378.779	0.5645	0.386859	10.696	337.3	2489.79	2.22206	4934.35
N143265-2.nii.gz	-49.1401	14.6094	2.3898e+07	4.33142	32.8919	3.7617	66.8034	-19.0444	20.8853	-18.2865	-111.313	178.117	14.0901	282.241	0.156944	1.91184e+08	0.0601111	724.057	415.11	24546.3	254.955	80.1358	22.8806	0.546369	3.58875	3.25614	9.41396	0.345858	0.255496	0.984408	0.916581	-0.272816	0.94649	0.250966	20.0191	0.00829132	7.30806	0.0298623	4.93673	25.7541	6.24864	60.6067	0.202022	3.98222	18.0333	28.97	417.06	12.5867	5603.12
N143530-1.nii.gz	-177.312	1.55686	4.34343e+06	5.1421	94.8198	2.88507	91.8032	-93.7922	56.6723	-99.4493	-265.347	357.15	39.6609	218.472	-0.0255191	3.47474e+07	0.0336916	5208.29	1160.83	840951	360.701	516.708	300.125	0.282502	13.4809	4.35681	97.2321	0.154248	0.0822591	0.951778	0.856284	-0.682185	0.99941	0.0756733	33.2626	0.0111349	6.56233	0.0223518	5.09837	204.208	5.5677	44.1648	0.485328	0.688806	3.06593	208.787	1489.01	3.02198	3669.89
N143530-2.nii.gz	-14.9366	31.22	1.51696e+07	3.86287	28.0527	2.52849	50.5892	6.37503	15.5808	5.82629	-39.844	90.4332	11.3705	306.954	0.039654	1.21357e+08	0.0770418	355.378	94.0644	3669.87	100.933	37.0142	12.9603	0.478013	2.83188	2.85803	4.65452	0.380646	0.291776	0.967458	0.87872	-0.294751	0.940085	0.286641	9.3814	0.0144052	6.38803	0.0377789	4.33953	12.4936	5.79733	32.2422	0.200262	3.46283	12.4037	14.0708	109.77	11.7329	943.857
N150364-1.nii.gz	-241.21	33.5963	3.25807e+07	6.27704	142.267	3.03361	182.081	-99.3345	82.8847	-94.8953	-451.435	633.515	57.3993	226.335	-0.267196	2.60646e+08	0.0151003	10960.9	5021.76	5.35251e+06	-4927.81	1300.77	504.817	0.44336	17.2803	5.35001	190.347	0.12564	0.0600102	0.972169	0.888844	-0.468994	0.998582	0.0626936	69.4431	0.00136151	9.61131	0.00425155	6.86842	451.396	7.07979	349.453	0.549454	0.417349	9.60377	438.865	5571.37	2.31447	12508.2
N150364-2.nii.gz	-27.1936	22.3364	8.70773e+07	4.05663	26.8192	5.11559	109.016	-2.05454	16.1972	-1.9053	-82.1159	191.132	11.0583	298.695	0.277301	6.96619e+08	0.0720635	447.076	301.884	8647.88	8.47724	45.9071	14.4736	0.517559	2.74105	2.95598	6.61138	0.403045	0.321358	0.991002	0.937665	-0.156088	0.821585	0.320633	17.147	0.00888441	7.27138	0.0221891	4.7146	15.0952	6.72901	140.982	0.144448	4.62807	70.334	17.9717	309.975	18.6906	5844.24
N150627-1.nii.gz	-262.879	48.7584	1.02825e+08	6.56636	163.146	2.98475	299.566	-105.453	96.3427	-101.194	-496.67	796.236	67.5091	229.045	-0.171341	8.22599e+08	0.0123042	14613.3	6371.31	9.01101e+06	-13140.5	1750.99	543.688	0.526454	18.0186	5.5246	209.979	0.123805	0.0597509	0.980183	0.904512	-0.302607	0.990416	0.0598899	77.9063	0.000507731	11.1143	0.00194222	7.30278	573.67	7.64118	998.767	0.509575	0.589337	24.1163	584.493	6891.12	2.69184	18858.3
N150627-2.nii.gz	-32.624	23.2077	136687529	4.26299	26.1263	6.04291	126.386	-2.32069	18.5291	0.0219078	-155.555	281.941	11.1874	298.797	-0.426813	1093500232	0.0697064	666.927	1036.16	23376.5	-272.75	66.48	22.8919	0.483005	3.25319	3.24014	12.1131	0.388703	0.309913	0.993527	0.94965	-0.14153	0.821526	0.312459	32.0197	0.0084703	7.70025	0.0256879	4.9246	22.343	6.945	218.471	0.142698	6.80724	106.72	26.6794	1052.85	20.9765	22935.8
N150727-1.nii.gz	-319.432	55.0679	1.89303e+07	6.59595	183.471	3.22889	342.165	-137.252	115.559	-139.81	-516.113	858.279	78.0347	219.754	0.3393	1.51443e+08	0.0121304	21804.7	6647.07	2.60565e+07	67373.9	2877.56	920.503	0.517545	24.0783	5.70208	322.038	0.0921929	0.0376285	0.97184	0.884955	-0.619802	0.999853	0.0411514	78.4668	0.0018996	9.07467	0.00376669	7.04186	949.516	6.97223	272.872	0.696103	0.208351	4.7551	871.615	6811.23	1.65816	10355.4
N150727-2.nii.gz	-121.787	42.3527	4.13218e+07	5.63286	86.3762	7.88693	99.408	-35.3855	54.7682	-22.6245	-432.487	531.895	35.957	274.85	-1.59303	3.30574e+08	0.0241671	5521.68	6441.76	3.38572e+06	-28209.3	677.379	272.543	0.429776	11.5609	4.82275	132.951	0.181334	0.102732	0.979064	0.910029	-0.373699	0.992587	0.109255	79.6272	0.00191914	9.19235	0.00579631	6.2332	237.48	6.84421	215.932	0.394758	0.881197	13.2194	220.976	6689.61	3.7532	26211.4
N151019-1.nii.gz	-223.867	-8.74465	1.37859e+07	5.84205	119.106	2.73313	70.4954	-105.284	67.1055	-95.4537	-341.936	412.431	48.002	211.564	-0.451401	1.10287e+08	0.0205136	6845.16	2151.54	1.67117e+06	-5950	805.201	317.502	0.433355	14.227	4.96278	105.962	0.139224	0.0691789	0.959867	0.864707	-0.540726	0.999056	0.0734418	45.0369	0.00286552	8.52039	0.00736931	6.28214	280.676	6.61548	155.299	0.504217	0.373798	6.31818	274.877	2621.78	2.3961	5942.32
N151019-2.nii.gz	-24.6795	35.4916	1.19068e+07	4.13576	33.0182	3.08779	50.4035	4.02172	19.4136	5.92694	-66.4492	116.853	13.3856	304.995	-0.448417	9.52544e+07	0.0651855	592.708	251.233	15313.3	-295.835	70.2492	24.7109	0.474198	3.92874	3.24868	8.65663	0.323523	0.231271	0.964358	0.873184	-0.411907	0.980467	0.221626	15.4859	0.0129464	6.45477	0.0293408	4.57309	23.74	5.45451	30.8125	0.240723	1.65405	8.34375	23.6181	257.852	7.67188	2020.96
N151022-1.nii.gz	-160.862	18.2528	9.96821e+07	5.764	89.6381	3.38305	130.363	-67.1528	54.1151	-64.0894	-351.662	482.025	37.0835	242.865	-0.356387	7.97457e+08	0.0217611	4765.65	3500.82	1.25683e+06	-5189.12	618.026	151.584	0.6062	9.52125	4.63261	58.6435	0.188321	0.106044	0.985045	0.915899	-0.228732	0.963092	0.109301	58.1732	0.00102152	10.2193	0.00387971	6.56941	192.402	7.20392	646.05	0.382278	0.921822	36.7763	191.034	3562.66	3.91124	14615
N151022-2.nii.gz	-31.9668	76.8761	2.04676e+08	5.13172	44.7792	5.2624	212.859	20.4238	33.4691	17.8087	-203.12	415.979	19.7007	323.896	0.321701	1637409271	0.0382805	2236.93	2072.81	340717	2352.11	249.193	60.0656	0.607781	5.52123	3.93606	28.7546	0.284767	0.196098	0.991878	0.94145	-0.178934	0.908651	0.2006	45.0057	0.00283039	9.13438	0.0101927	5.82719	77.3147	7.25942	440.148	0.225601	2.69691	74.6853	89.5162	2167.91	9.27268	19202
N151249-1.nii.gz	-104.156	33.0993	6.23439e+07	5.38254	68.3843	3.32513	108.979	-31.1035	42.0526	-25.9807	-223.619	332.598	28.3473	274.233	-0.518613	4.98752e+08	0.0288414	2898.45	1613.31	461174	-4906.33	368.283	77.9223	0.649503	6.87273	4.16904	29.828	0.227827	0.13786	0.983602	0.911698	-0.261066	0.968305	0.145766	39.2519	0.00194213	9.2774	0.00584504	6.09512	111.551	6.93903	258.537	0.311866	1.11699	23.9095	115.326	1657	4.97829	8810.77
N151249-2.nii.gz	-24.2695	40.5272	7.01212e+07	4.28817	27.5466	3.54978	67.5885	7.23627	18.8065	6.87965	-79.7474	147.336	12.0324	308.245	-0.187596	5.6097e+08	0.0638178	621.052	332.644	15174.9	-42.7612	64.5801	21.6516	0.494378	3.40266	3.27216	9.76406	0.364008	0.279231	0.978251	0.905309	-0.162332	0.855329	0.285751	17.9415	0.00753116	7.66705	0.0229083	4.94525	21.5579	6.68314	122.976	0.166634	4.13252	47.0976	24.9446	347.142	14.832	4838.53
N151307-1.nii.gz	-191.388	51.3326	2.03384e+08	6.25149	124.811	3.60794	231.581	-64.4845	75.5154	-58.0584	-482.326	713.907	51.9998	254.342	-0.450365	1627074401	0.0156461	9222.12	7208.86	4.91336e+06	-18391.1	1170.19	315.635	0.575761	13.6974	5.14993	122.233	0.147618	0.0751693	0.98557	0.917489	-0.205719	0.960301	0.0782442	83.6372	0.000509801	11.2173	0.00186563	7.04602	371.456	7.52437	1410.59	0.44866	0.6198	49.1915	368.578	7525.29	3.01718	22549.7
N151307-2.nii.gz	-28.9078	42.3911	1.2897e+08	4.52973	35.9996	4.1723	94.3636	7.60991	22.2832	9.4629	-144.502	238.866	14.8677	308.971	-0.404173	1031763885	0.0522874	839.126	976.78	37950.8	-345.964	98.2819	27.9887	0.554035	3.99493	3.44917	11.4233	0.324788	0.234376	0.988431	0.926947	-0.142521	0.834408	0.242179	30.971	0.00431552	8.34469	0.0129668	5.27191	31.5677	6.84462	270.048	0.199888	2.57937	70.6403	33.4525	995.784	10.6625	10838.6
N151400-1.nii.gz	-142.025	47.3688	4.54756e+08	5.92369	100.056	3.06633	227.814	-46.5394	59.4825	-43.1891	-341.612	569.427	41.8093	264.159	-0.216598	3638047487	0.019113	5537.66	3771.54	1.56297e+06	-4541.87	717.739	168.707	0.618847	10.0316	4.71309	64.6322	0.181836	0.10062	0.987793	0.923502	-0.12858	0.874181	0.105903	60.2847	0.000592825	11.0805	0.0019975	6.75127	221.612	7.50685	2415.59	0.37066	0.809382	124.56	221.532	3844.46	3.86021	15400.9
N151400-2.nii.gz	-45.7268	60.8729	4.28101e+08	5.17741	51.4913	4.5917	178.677	5.26401	34.056	4.0402	-227.741	406.418	21.8797	308.643	-0.0414964	3424811541	0.0349476	2074.55	2269.56	288674	169.934	247.988	66.1763	0.576753	5.96016	4.02449	29.2621	0.265357	0.176002	0.990608	0.935601	-0.126759	0.836021	0.18258	47.1603	0.0019481	9.61484	0.00560976	5.93963	78.5411	7.34203	1052.19	0.234131	1.92823	157.055	83.0622	2344.18	8.02893	18565.1
N151520-1.nii.gz	-256.129	-31.8598	1.49201e+07	6.05901	120.047	4.42194	82.7639	-148.747	73.6645	-141.391	-511	593.764	49.6308	178.934	-0.633485	1.19361e+08	0.01807	9139.97	5119.67	5.19385e+06	-25188.7	1087.81	453.331	0.414047	16.5183	5.17892	172.609	0.124675	0.0579054	0.971538	0.886738	-0.561207	0.999349	0.0706731	70.4296	0.00262861	8.64913	0.0052716	6.38308	385.286	6.50262	336.987	0.723148	0.170753	8.4206	366.302	5803.31	1.55365	8866.78
N151520-2.nii.gz	-31.5807	45.2628	6.6609e+06	4.21081	43.4368	2.28662	69.9823	5.02288	23.4104	1.2432	-46.1418	116.124	17.6136	306.293	0.19559	5.32872e+07	0.0632811	776.524	130.354	15437.7	323.761	78.0977	38.2636	0.326349	4.88591	2.96425	12.8022	0.275888	0.179626	0.944385	0.843829	-0.671722	0.995924	0.179481	10.9195	0.0310694	5.14137	0.0546603	3.8084	29.0903	4.86405	28.9437	0.407657	0.573696	4.49296	30.9538	163.69	3.19718	588.254
N151606-1.nii.gz	-181.046	50.6924	2.59713e+08	6.20549	114.381	4.3663	219.389	-55.7861	73.4383	-43.3541	-539.819	759.208	48.9913	262.19	-0.760894	2077706790	0.0165427	9103.19	9528.9	6.25098e+06	-32482.8	1195.15	297.874	0.601648	12.8817	5.08961	126.299	0.160394	0.085477	0.987777	0.925955	-0.197353	0.955395	0.0890038	96.46	0.000531897	11.219	0.00209968	7.02073	373.256	7.5824	1610.32	0.426235	0.724621	62.4981	364.165	9840.09	3.29751	32924
N151606-2.nii.gz	-34.3046	33.0732	4.65145e+08	4.52605	31.2961	5.83174	119.912	-0.271517	21.446	0.570951	-203.735	323.647	13.293	301.176	-0.37732	3721161786	0.056255	869.784	1729.17	58115.1	-232.74	103.656	28.8951	0.562052	3.79854	3.44055	14.0289	0.349306	0.263564	0.993457	0.947387	-0.112457	0.775497	0.267992	41.3579	0.00484299	8.46668	0.0133599	5.30735	33.1378	7.1753	844.986	0.164779	4.59693	288.475	34.8519	1751.97	15.9626	28059.8
N151653-1.nii.gz	-263.314	41.7106	1.59918e+08	6.54641	152.492	3.31031	216.77	-100.964	93.6189	-89.8864	-557.244	774.014	63.691	232.044	-0.541882	1279343057	0.0126502	14229.2	8636.73	1.07368e+07	-43674.2	1800.43	505.168	0.56175	17.1963	5.47684	201.776	0.128295	0.0625404	0.980712	0.906452	-0.254706	0.981926	0.0642942	91.1745	0.000423942	11.4255	0.00158845	7.31991	576.4	7.63672	1525.68	0.513696	0.494669	37.571	569.239	9089.65	2.54815	23968.2
N151653-2.nii.gz	-40.0311	27.4656	2.69381e+08	4.55255	33.4436	7.66069	221.354	-4.84351	22.287	-4.08819	-159.728	381.082	14.1363	296.752	0.527834	2155050979	0.0543801	944.554	1006.82	55752.4	275.061	94.2822	28.367	0.530244	3.7547	3.42187	13.9348	0.350025	0.263092	0.995387	0.955391	-0.122154	0.796135	0.2619	31.4695	0.00501926	8.30371	0.0142789	5.22545	30.6623	7.14902	507.28	0.165832	4.36668	166.349	37.8577	1032.36	15.2746	15760.4
N151847-1.nii.gz	-258.779	66.7457	168702107	6.66686	166.204	3.80579	259.088	-89.8143	101.357	-80.6644	-651.606	910.694	69.0964	247.233	-0.561112	1349616856	0.0116488	16945.9	13071.9	1.62617e+07	-49709.4	2126.13	675.868	0.518003	19.6598	5.66534	279.261	0.117047	0.0552613	0.981381	0.908702	-0.278308	0.987771	0.0583078	112.735	0.000392149	11.5051	0.00142478	7.44052	700.499	7.6619	1509.76	0.547013	0.419413	32.1507	677.974	13567.8	2.32101	32381.8
N151847-2.nii.gz	-31.8096	49.8382	1.75542e+08	4.71957	32.3701	7.13105	224.746	9.61532	25.7026	6.17057	-109.376	334.122	14.2503	311.941	1.32443	1404333883	0.0526411	1445.3	615.913	201556	2994.78	162.165	32.6096	0.65983	3.90765	3.4851	16.9641	0.356066	0.273152	0.993087	0.947796	-0.188003	0.900835	0.271603	24.1561	0.0057141	8.31423	0.018952	5.40789	48.6937	7.24294	285.431	0.158221	5.30277	94.9645	57.7624	654.08	16.9701	9859.41
N151881-1.nii.gz	-197.404	0.45146	5.39283e+07	5.9438	100.186	3.19618	135.335	-94.1265	61.3455	-90.6934	-334.517	469.852	41.7108	220.22	-0.168141	4.31426e+08	0.0192294	6112.73	2341.21	1.76906e+06	-3970.64	753.76	234.712	0.527108	11.8752	4.91992	89.6717	0.164689	0.0886711	0.976049	0.895593	-0.311278	0.98747	0.0898035	47.0249	0.00108464	10.0346	0.00381597	6.65153	247.118	7.1772	473.379	0.425701	0.644131	21.3831	244.934	2613.96	3.18345	7746.48
N151881-2.nii.gz	-28.944	42.365	1.67885e+08	4.58061	34.6507	4.8901	125.479	4.43919	22.8122	2.32587	-142.783	268.262	14.4487	305.996	0.175564	1343081109	0.053107	950.43	921.883	47649.7	331.557	97.7505	29.5769	0.529107	3.91714	3.47305	13.838	0.341569	0.254936	0.990693	0.93698	-0.134686	0.823563	0.259813	30.0804	0.00489499	8.30221	0.0149039	5.23735	31.8319	7.04987	310.034	0.172914	4.06164	95.2209	38.0179	961.798	14.2069	12618.4
N152001-1.nii.gz	-101.335	35.3947	2.37946e+08	5.46905	68.9054	3.48322	124.501	-33.5837	42.7175	-32.5749	-241.654	366.155	28.849	272.008	-0.304979	1903571859	0.0270834	3010.68	1845.77	510762	-2569.85	375.829	102.129	0.571957	7.69026	4.34334	40.7015	0.218532	0.131608	0.982587	0.91118	-0.143001	0.880206	0.139195	42.1581	0.0011857	10.1373	0.00377291	6.26204	119.489	7.22467	1005.51	0.31266	1.10251	87.1001	120.496	1950.53	4.95709	9354.76
N152001-2.nii.gz	-31.1095	48.9521	1.00744e+08	4.61909	40.2636	3.74941	91.2672	12.6912	24.5805	16.0917	-120.016	211.283	16.7147	314.274	-0.663487	8.05949e+08	0.0487697	992.461	815.911	42330.7	-578.166	108.225	33.8722	0.51744	4.35027	3.57435	14.4659	0.309756	0.217055	0.98376	0.915245	-0.160284	0.870437	0.218468	28.2367	0.00401414	8.36155	0.0115974	5.32111	35.5242	6.75233	222.496	0.218133	2.32934	49.7451	39.7829	825.871	9.20196	8341.55
N152235-1.nii.gz	-198.685	-13.085	9.8928e+06	5.60593	103.522	2.52669	70.8148	-111.958	56.6439	-113.98	-282.371	353.186	40.5672	200.536	0.175048	7.91424e+07	0.0232996	4854.98	1116.17	634342	2297.68	479.453	259.738	0.309934	12.6592	4.75917	87.5239	0.15674	0.0827326	0.956455	0.861222	-0.537568	0.998571	0.0712124	32.5644	0.00402682	8.05731	0.0120015	5.93364	184.798	6.4256	105.154	0.427457	0.711217	5.73171	194.199	1423.76	3.27642	3759.35
N152235-2.nii.gz	-31.8703	14.1374	4.02523e+06	3.60316	29.2844	2.55406	25.6198	-4.80799	15.8456	-1.34596	-48.5728	74.1926	11.2371	295.812	-0.607217	3.22018e+07	0.101134	366.655	84.6275	3720.35	-85.6118	40.5744	20.2054	0.334443	3.66416	2.84706	5.53138	0.314082	0.218211	0.933679	0.827154	-0.578433	0.991267	0.2463	8.91095	0.0317227	5.11054	0.0599034	3.66306	15.1949	4.43085	16.3478	0.355388	1.08507	4.65217	14.3785	105.457	4.91304	592.065
N152637-1.nii.gz	-143.76	23.1959	1.31712e+08	5.70145	82.9896	3.85811	120.889	-55.7595	51.3501	-50.3179	-372.389	493.279	34.4775	253.105	-0.628176	1053697399	0.0230823	4408.91	4173.22	1.16958e+06	-8722.57	560.564	159.1	0.557817	9.49922	4.64558	66.3639	0.191023	0.107789	0.985091	0.917997	-0.203733	0.948822	0.113492	63.8185	0.00102495	10.2543	0.003617	6.47627	179.916	7.15349	787.671	0.383109	0.716448	47.4572	176.425	4318	3.6177	15851.6
N152637-2.nii.gz	-37.9117	51.0633	1.1616e+08	4.85781	43.4564	4.40731	167.486	5.45211	28.1215	2.75071	-119.094	286.581	18.5903	307.685	0.609948	9.29284e+08	0.0421652	1369.33	681.608	121825	1549.94	156.588	41.0938	0.581365	4.8079	3.70726	17.1463	0.294922	0.203985	0.988365	0.927319	-0.179642	0.900306	0.211708	25.5482	0.0032545	8.68251	0.00958055	5.53038	49.4203	6.89959	290.687	0.236909	2.0508	51.7368	54.7913	710.059	8.08068	5422.21
N152679-1.nii.gz	-184.775	32.6672	8.06025e+07	6.0938	120.333	3.17632	148.838	-76.5774	69.3174	-74.2979	-408.285	557.123	48.2879	239.773	-0.290004	6.4482e+08	0.0171133	7573.41	4626.94	2.77969e+06	-6591.36	956.385	357.905	0.458449	14.678	5.20063	133.084	0.141403	0.0713673	0.973923	0.891322	-0.301397	0.987402	0.0734036	66.9125	0.000817672	10.4292	0.0027844	6.84888	328.573	7.19926	681.521	0.486106	0.507347	23.9929	303.134	4817.31	2.67047	13336.9
N152679-2.nii.gz	-34.4823	42.884	1.72012e+08	4.71876	36.9301	6.56998	155.759	6.26123	25.0943	7.98728	-197.091	352.849	15.4587	308.276	-0.643805	1376092873	0.049413	1238.1	1794.36	111027	-524.87	130.872	39.9026	0.526267	4.43832	3.6377	19.614	0.322732	0.234772	0.992675	0.944844	-0.152536	0.858999	0.236063	42.0904	0.0041369	8.52481	0.0137661	5.38779	42.6936	7.13291	331.062	0.182907	3.62873	89.4376	49.6282	1792.53	12.6354	22751.4
N152845-1.nii.gz	-166.455	26.606	8.90199e+07	5.91421	103.599	3.8236	176.523	-72.5848	61.0691	-75.1253	-433.126	609.649	42.735	240.115	-0.0919079	7.12159e+08	0.0192388	5937.68	5284.28	1.81677e+06	-5.99091	676.571	233.004	0.488297	11.846	4.91347	88.5946	0.159993	0.0829113	0.985404	0.916454	-0.241644	0.969869	0.0852891	71.9259	0.000913145	10.3256	0.00305972	6.60304	227.394	7.1655	702.772	0.455163	0.685272	29.7047	237.901	5563.69	3.08938	16324.9
N152845-2.nii.gz	-22.8466	55.5631	2.00495e+08	4.73083	36.877	5.65751	194.13	14.961	25.2113	12.5657	-178.947	373.077	15.7373	316.856	0.192769	1603957868	0.0486491	1197.51	1573.02	74403.8	565.548	122.935	36.4344	0.537476	4.23575	3.58989	18.0797	0.332531	0.245981	0.993796	0.94905	-0.146241	0.852169	0.248602	39.3877	0.00421062	8.5513	0.0143935	5.41585	39.8423	7.18036	355.757	0.178146	4.55668	97.1522	47.9434	1607.15	14.311	21459.9
N152949-1.nii.gz	-276.89	34.8013	3.8396e+07	6.46593	167.888	2.50524	182.689	-119.284	96.0883	-118.992	-462.456	645.145	70.2051	215.082	-0.100282	3.07168e+08	0.0128088	13602.1	4450.75	6.42258e+06	4986.25	1593.99	574.213	0.4723	18.751	5.47786	206.791	0.118563	0.056333	0.969265	0.882028	-0.457977	0.9986	0.0574591	64.7639	0.00108417	9.93523	0.00311244	7.07509	542.052	7.28196	461.663	0.55622	0.354048	10.6313	544.672	5391.52	2.18795	11134.6
N152949-2.nii.gz	-52.7141	50.174	3.84709e+07	5.01027	58.3653	3.26511	94.3918	-1.38904	33.4908	-0.383485	-152.004	246.395	23.4819	301.575	-0.379148	3.07767e+08	0.0361764	1779.19	1045.86	110558	-498.489	194.963	67.9704	0.481107	6.25591	3.94964	26.3913	0.243311	0.151589	0.97552	0.895972	-0.292951	0.971631	0.163072	31.8443	0.00327887	8.46169	0.0093683	5.63156	65.7334	6.51881	129.449	0.306026	1.13711	15.3026	71.4042	1045.94	5.12766	5293.83
N153026-1.nii.gz	-229.911	0.19229	8.19924e+06	5.84008	117.347	2.97244	58.8457	-118.671	70.3309	-116.867	-382.32	441.165	48.9405	201.47	-0.351184	6.55939e+07	0.0202431	7710.18	2748.75	2.30792e+06	-7269.4	879.709	337.939	0.450608	14.4525	4.9276	117.965	0.140939	0.0704095	0.962199	0.8698	-0.620953	0.999596	0.0641168	51.1137	0.00420087	7.94809	0.00871117	6.09731	304.412	6.56741	94.1188	0.465935	0.527203	4.08911	307.686	3198.08	2.79208	9083.72
N153026-2.nii.gz	-46.5337	40.3942	3.39513e+07	4.76891	47.2005	3.33643	117.481	0.771287	28.4003	1.39127	-103.83	221.311	19.5568	302.92	0.258847	271610462	0.0432432	1296.92	499.016	63899.4	617.354	134.717	47.3625	0.474926	5.3427	3.77032	18.0361	0.263338	0.168956	0.97839	0.899934	-0.274103	0.960252	0.179696	21.844	0.0044125	8.06877	0.013065	5.35717	45.5199	6.26093	106.405	0.287582	1.15559	16	51.7298	520.511	5.48649	2768.27
N153475-1.nii.gz	-97.1482	22.8854	2.79316e+08	5.24782	63.0833	2.99261	89.0504	-36.2423	37.496	-32.9294	-219.032	308.083	26.1819	267.893	-0.28157	2234528643	0.0305877	2198.6	1415.64	262684	-1323.19	298.569	56.1304	0.683755	5.693	3.93028	22.4377	0.263272	0.171631	0.986177	0.920257	-0.146774	0.87285	0.177264	36.8105	0.00160295	9.7305	0.00504518	6.11684	88.6749	7.34793	982.696	0.252491	1.79311	119.047	88.0321	1476.26	7.2816	11230.9
N153475-2.nii.gz	-28.7804	23.2981	5.29856e+08	4.14206	24.7806	4.9112	102.458	-2.0655	16.482	-0.831618	-111.614	214.072	10.433	298.766	-0.272236	4238844219	0.072301	496.408	544.861	15758.8	-135.241	57.0545	15.4302	0.570533	2.80849	3.03592	7.2595	0.40484	0.325623	0.992379	0.94293	-0.112578	0.739378	0.324366	23.1182	0.00833005	7.67644	0.0229832	4.89638	18.1212	7.10362	775.058	0.130569	6.46452	429.179	19.9669	553.261	24.1226	13529
N153476-1.nii.gz	-202.33	85.465	1.10244e+08	6.39775	149.303	2.67378	226.489	-56.6052	86.1098	-53.3396	-427.644	654.133	60.9941	265.837	-0.0559789	8.81955e+08	0.0134665	11428.4	5630.69	4.93602e+06	-1096.95	1338.2	465.455	0.48397	16.9539	5.40778	169.461	0.123757	0.0582346	0.975329	0.892768	-0.307253	0.989954	0.0616253	73.5688	0.000622919	10.8022	0.00220784	7.10229	450.913	7.39698	823.162	0.527668	0.381992	21.0077	457.004	6110.02	2.32051	13950.6
N153476-2.nii.gz	-35.1492	51.779	2.62769e+08	4.83614	37.5168	5.5676	148.975	5.27073	26.8907	3.29298	-216.578	365.553	16.3208	307.554	-0.0121886	2102152806	0.0462728	1399.09	2118.96	138165	840.55	163.089	39.8508	0.604367	4.47257	3.65539	19.4657	0.316489	0.227169	0.993065	0.945722	-0.147394	0.860714	0.232893	45.6963	0.00375753	8.79611	0.0121756	5.56398	50.7348	7.20656	527.714	0.189962	3.27124	128.546	56.0133	2130.98	11.7394	24114.5
N153617-1.nii.gz	-191.41	32.9556	6.15516e+07	6.06382	109.55	3.39723	180.607	-75.1995	67.9543	-72.9016	-433.545	614.152	46.8845	240.745	-0.201381	4.92413e+08	0.0174758	7422.95	5073.91	2.68939e+06	-5801.53	871.284	333.513	0.448902	14.1836	5.13237	124.405	0.141636	0.0702591	0.979795	0.903081	-0.343865	0.992007	0.0731414	70.2794	0.00107452	10.0141	0.00346524	6.71477	301.199	7.03757	537.896	0.506494	0.427417	18.5593	297.116	5547.36	2.46516	13252.1
N153617-2.nii.gz	-50.6109	34.5323	1.56559e+08	4.77289	43.6861	3.56245	112.079	-5.16402	26.7772	-2.05162	-146.108	258.187	18.2206	296.821	-0.424432	1252470674	0.0438401	1174.63	897.861	66137.9	-789.12	134.107	38.8352	0.549246	4.6784	3.68077	16.3281	0.297039	0.20505	0.986954	0.923146	-0.135399	0.838391	0.211665	29.5642	0.00322106	8.76271	0.0100825	5.49723	43.2355	6.94702	394.317	0.2219	2.41259	77.9038	47.1248	915.633	9.24536	8898.95
N153654-1.nii.gz	-175.553	35.5476	3.49801e+07	5.95868	114.765	2.75804	171.403	-76.215	66.6508	-81.2718	-314.586	485.989	47.9145	238.298	0.18364	2.7984e+08	0.0184317	6706.07	2422.89	1.8188e+06	5574.43	801.947	289.309	0.470615	13.5484	5.02451	100.385	0.142868	0.070905	0.972294	0.88551	-0.41726	0.996391	0.0737168	47.9029	0.0015742	9.41517	0.00466217	6.56616	272.814	6.85622	312.76	0.507727	0.406266	11.3539	268.302	2595.89	2.42857	5940.26
N153654-2.nii.gz	-24.708	35.0186	6.36581e+07	4.28725	31.7044	3.31902	76.4807	5.89957	19.1551	7.44294	-79.8681	156.349	13.035	306.869	-0.181981	5.09265e+08	0.0613686	594.31	324.713	11746.5	-118.523	60.7779	16.4073	0.56792	3.15964	3.09779	6.18991	0.356447	0.26579	0.984811	0.914539	-0.171557	0.862553	0.278295	17.709	0.00697373	7.54407	0.0207466	4.91479	19.2963	6.52166	129.568	0.191669	2.85437	41.4852	23.8716	336.994	11.2781	3544.49
N153673-1.nii.gz	-142.228	31.2248	9.05115e+07	5.74458	92.1109	2.92506	117.952	-53.2918	53.7565	-53.3572	-293.692	411.644	37.5872	255.731	-0.185086	7.24092e+08	0.0214884	4533.52	2398.99	864653	-2409.14	527.671	179.873	0.491227	10.3883	4.74209	68.5698	0.17778	0.0976831	0.976007	0.895473	-0.22607	0.961254	0.0991731	48.0832	0.00103536	10.1546	0.00377725	6.45983	176.886	7.1644	525.85	0.379949	0.759788	29.7399	180.916	2566.93	3.6922	9487.85
N153673-2.nii.gz	-34.7103	42.6162	1.74919e+08	4.67226	33.6279	5.54422	124.12	1.8079	24.0206	2.08394	-188.884	313.004	14.6382	303.658	-0.542148	1399351844	0.0513612	1120.21	1529.76	81021.2	-658.722	116.851	35.2513	0.529328	4.17398	3.56694	17.2955	0.338657	0.253875	0.991538	0.941204	-0.145111	0.843482	0.258354	38.8504	0.00493516	8.43443	0.0176483	5.33525	38.0257	7.16137	326.89	0.17232	4.80335	97.4323	44.8964	1555.55	15.1265	23108.5
N153700-1.nii.gz	-103.814	40.3173	5.10348e+08	5.54779	76.0504	3.27519	175.848	-30.4058	45.2252	-29.937	-326.048	501.896	31.4248	275.581	-0.106823	4082785953	0.0251353	3263.63	3729.59	527290	-562.777	403.671	125.46	0.525848	8.66044	4.51814	48.3046	0.199557	0.114771	0.98844	0.92528	-0.0957264	0.795268	0.119171	60.4981	0.00087127	10.5802	0.0025614	6.3503	132.283	7.30247	2223.28	0.330845	1.04543	168.909	130.682	3780.93	4.62946	17612.8
N153700-2.nii.gz	-45.6444	38.9969	1.89802e+08	4.75996	41.4144	4.16332	113.857	-1.53187	26.0291	0.837214	-160.098	273.955	17.128	300.422	-0.577623	1518419170	0.0452577	1169.94	1153.07	77446	-797.695	136.617	33.7492	0.6001	4.36242	3.58425	14.1969	0.307293	0.214784	0.989744	0.931149	-0.145638	0.853398	0.220704	33.5759	0.00336249	8.70086	0.009648	5.51477	42.5915	6.96042	449.55	0.213766	2.19569	95.1769	46.8328	1148.71	9.1379	11168
N153842-1.nii.gz	-186.196	12.439	2.33069e+07	5.86824	115.392	2.43173	82.7976	-91.274	63.8133	-94.3459	-298.142	380.94	46.6271	222.686	0.0215942	186455231	0.0191761	6022.61	1696.62	1.19431e+06	2549	669.844	296.451	0.386121	13.5185	5.01293	108.846	0.14669	0.0747784	0.95649	0.861432	-0.446168	0.997194	0.079091	40.0358	0.00196519	9.08587	0.00570163	6.39335	241.574	6.74062	231.689	0.492956	0.395636	9.01277	239.273	2024.43	2.4766	4750.38
N153842-2.nii.gz	-25.2543	39.3537	5.08472e+07	4.41476	32.5939	4.04052	79.9448	9.08568	21.0264	10.9861	-90.4628	170.408	13.7334	310.325	-0.6419	4.06778e+08	0.0577221	767.603	484.82	20357.3	-242.989	72.8451	30.9923	0.395746	4.07284	3.47192	13.9719	0.323714	0.23295	0.977484	0.903079	-0.189929	0.892567	0.243625	21.7794	0.00611427	7.77704	0.017933	4.98984	25.9593	6.44446	114.758	0.217344	2.93159	30.4773	30.7985	485.506	9.96212	5073.23
N153899-1.nii.gz	-297.35	-17.0156	9.16902e+06	6.19059	151.036	2.80983	117.092	-157.713	88.9062	-161.7	-467.949	585.041	61.7062	180.317	0.214413	7.33521e+07	0.015467	12268.6	3736.46	3.8232e+06	8632.27	1134.25	614.527	0.293696	19.0568	5.28119	229.656	0.122803	0.0598521	0.96138	0.871384	-0.621553	0.999718	0.0563964	60.0465	0.00319478	8.35209	0.00742984	6.34573	437.194	6.71192	153.206	0.543283	0.480559	4.3617	490.946	4451.91	2.43262	9416.29
N153899-2.nii.gz	-26.6115	33.6825	6.38837e+07	4.31675	34.3833	4.1336	90.2402	4.98519	20.0823	6.25306	-108.483	198.723	13.9277	306.057	-0.205116	5.1107e+08	0.0595153	655.184	578.876	16139.8	-15.3885	70.1334	21.2801	0.527167	3.40936	3.21986	9.26211	0.353136	0.263727	0.988142	0.927262	-0.185673	0.883194	0.27177	23.8044	0.00648873	7.66547	0.0206051	4.98702	22.8534	6.54954	129.804	0.190328	2.86262	40.5894	26.1415	578.391	11.566	6958.71
N153976-1.nii.gz	-232.191	38.8043	6.42776e+07	6.37791	142.098	3.70639	252.343	-87.3226	86.014	-79.4148	-583.749	836.092	57.539	239.992	-0.351712	5.1422e+08	0.0148428	12364.7	10104.4	8.86246e+06	-17125	1560.35	497.495	0.517168	16.9474	5.41366	199.636	0.131081	0.0651745	0.983505	0.913454	-0.376014	0.995895	0.066969	99.1901	0.000824863	10.3886	0.00320576	7.10014	514.461	7.37179	539.977	0.48385	0.472974	16.5645	494.905	10501.5	2.62724	27334.2
N153976-2.nii.gz	-41.4122	31.7735	8.94224e+07	4.58321	34.4463	7.84416	101.855	-2.4018	23.286	-0.282465	-235.772	337.627	14.561	299.335	-1.03163	7.1538e+08	0.0528893	1036.95	2325.59	89404.4	-1161.71	113.445	33.7582	0.539153	3.94055	3.4583	17.8126	0.34671	0.26097	0.99335	0.948789	-0.186054	0.894635	0.266121	48.0172	0.00533784	8.10729	0.0163723	5.27146	36.8007	6.93725	175.988	0.176341	3.82122	52.7836	41.4475	2347.47	13.4449	31399
N154076-1.nii.gz	-236.802	44.2423	1.47025e+08	6.44616	138.318	4.09863	268.288	-81.4121	88.6325	-63.1107	-564.285	832.573	58.3853	247.2	-0.812801	1176202365	0.0140809	13327.1	9574.37	1.15607e+07	-55556.4	1723.7	447.794	0.587668	15.519	5.35972	201.281	0.145068	0.0746795	0.985025	0.920076	-0.280034	0.986361	0.0757472	96.2044	0.00054319	11.1029	0.00222241	7.22662	542.874	7.66833	1098.38	0.456518	0.657215	33.8786	533.156	9982.27	3.03491	31416.6
N154076-2.nii.gz	-41.9404	48.7317	1.3315e+08	4.92958	41.8226	5.81756	126.218	3.97421	29.5481	7.35827	-201.531	327.749	17.7623	306.756	-0.962294	1065201580	0.0425731	1698.76	1860.65	202952	-2118.71	182.127	45.7198	0.593087	4.78486	3.71909	22.081	0.305958	0.2166	0.990406	0.937009	-0.189022	0.908914	0.222907	42.738	0.00351554	8.69099	0.0102798	5.60394	56.9618	7.09382	296.31	0.209407	2.37206	60.241	68.1018	1856.64	9.52721	18834
N160069-1.nii.gz	-141.575	13.9953	6.0824e+07	5.60886	87.1857	3.69114	89.6447	-60.1714	51.2534	-53.9482	-321.15	410.795	36.0292	248.37	-0.653901	4.86592e+08	0.0240651	4169.92	2825.31	1.04932e+06	-8201.18	531.086	144.177	0.572602	9.25884	4.5693	55.8328	0.190754	0.107464	0.980537	0.905291	-0.269422	0.974966	0.111854	52.2347	0.00140069	9.70813	0.00457659	6.36254	168.816	7.0201	365.487	0.370676	0.757925	23.7282	166.475	3023.84	3.75862	11431.2
N160069-2.nii.gz	-18.6096	89.278	6.46948e+07	5.11093	54.0646	5.58326	175.183	30.0443	35.2053	28.0142	-211.197	386.38	22.9175	333.406	-0.478533	5.17558e+08	0.035988	2230.13	2438.89	260314	-535.925	226.847	66.9323	0.53625	6.01458	3.98124	29.726	0.260239	0.169291	0.989816	0.932829	-0.275056	0.965903	0.173569	48.9782	0.00332143	8.56726	0.0110088	5.68939	73.4449	6.76414	158.426	0.27221	1.69359	20.945	89.1228	2539.54	6.51546	15180.8
N160205-1.nii.gz	-315.991	78.2198	8.79437e+07	6.83094	202.85	3.2501	274.347	-108.545	120.882	-94.2489	-776.662	1051.01	84.1472	244.593	-0.555461	7.03549e+08	0.0101772	23170.7	17938.9	2.51576e+07	-67931.1	2848.17	1006.42	0.479386	24.4156	5.92747	393.731	0.0999699	0.0450338	0.979062	0.902355	-0.409386	0.99815	0.0443203	132.206	0.000563267	10.8926	0.00181721	7.54791	963.647	7.67556	845.214	0.574975	0.353286	14.9605	926.196	19096.5	2.13469	40494.1
N160205-2.nii.gz	-13.0046	22.2796	1.31523e+08	3.53597	17.7993	3.60919	59.7573	3.57077	11.1222	2.4219	-46.178	105.935	7.46483	303.911	0.265219	1052183471	0.105308	206.398	127.425	2082.94	36.3839	23.5139	6.98522	0.539612	2.01196	2.56249	2.8252	0.455649	0.383888	0.986279	0.920557	-0.11315	0.714021	0.386805	11.1037	0.0157686	6.54787	0.038328	4.26322	7.62477	6.45314	181.93	0.12776	5.59326	149.959	8.28587	134.138	25.3034	3068.35
N160302-1.nii.gz	-155.269	23.6583	1.02365e+08	5.76691	93.4998	3.35575	160.346	-60.8688	55.5274	-56.2389	-361.436	521.782	39.1536	249.077	-0.398316	8.18917e+08	0.0211989	4855.45	3877.22	1.29103e+06	-7881.39	610.705	141.655	0.620793	9.05676	4.56785	57.3806	0.196408	0.112928	0.98801	0.925095	-0.225355	0.960939	0.119622	61.3177	0.00104201	10.1701	0.00379507	6.53161	188.09	7.24995	601.758	0.364702	0.824132	34.9782	194.45	3955.78	3.93455	16155.7
N160302-2.nii.gz	-7.03181	25.1835	1.06184e+08	3.34976	13.0697	5.3993	67.8196	7.03422	9.9432	5.25914	-42.8942	110.714	5.69096	307.359	1.07266	8.49471e+08	0.132284	199.615	117.355	2417.57	106.34	19.9333	6.93827	0.473429	1.7667	2.46248	3.69236	0.514836	0.45994	0.987924	0.93368	-0.12854	0.720517	0.424556	10.6818	0.0287764	5.96083	0.0676705	3.96181	6.7179	6.51833	102.9	0.0915484	11.5566	148.687	8.14096	126.92	42.4164	4740.92
N160311-1.nii.gz	-227.767	20.6763	4.13868e+07	6.21255	121.617	3.5952	162.652	-93.103	76.9658	-85.28	-474.667	637.318	51.0088	229.759	-0.529593	3.31094e+08	0.0163604	9982.84	5959.25	6.38069e+06	-22716.5	1373.7	365.049	0.581873	14.7206	5.1744	141.098	0.13941	0.0686454	0.979352	0.902825	-0.42832	0.997539	0.0707798	75.5441	0.00121908	9.80226	0.00387172	6.91905	434.688	7.13447	393.941	0.502476	0.418725	12.8265	399.85	6308.44	2.46684	16043.9
N160311-2.nii.gz	-43.6698	62.5882	1.24588e+08	5.11133	50.9592	4.5529	166.796	8.87709	32.9677	8.08889	-203.955	370.751	20.8424	312.106	-0.14183	9.96704e+08	0.0373673	2005.4	1844.25	231341	-562.732	222.681	69.8139	0.520279	6.18889	4.06122	30.3322	0.259075	0.170879	0.988234	0.927794	-0.19035	0.920011	0.179101	42.4969	0.00261813	9.08817	0.0102394	5.79435	73.1237	7.0037	335.289	0.26215	1.9644	47.7928	80.4241	1953.98	7.15168	13453.8
N160387-1.nii.gz	-159.293	9.8171	3.42105e+07	5.69339	88.2061	3.12705	119.886	-75.4879	53.1823	-74.5958	-285.402	405.288	36.4821	234.522	-0.14304	2.73684e+08	0.0224874	4595.06	1830.79	818889	-1001.64	491.34	185.836	0.448946	10.6402	4.72017	68.712	0.171862	0.0929099	0.974628	0.89203	-0.341889	0.989147	0.101572	41.8829	0.00173249	9.33066	0.00559555	6.2743	169.294	6.80799	272.727	0.438467	0.574043	13.9871	183.949	2066.98	3.01608	5989.02
N160387-2.nii.gz	-19.9515	38.2417	4.76898e+07	4.23404	28.161	4.3679	90.2225	9.74255	18.3467	11.0262	-84.003	174.225	11.8051	310.706	-0.562934	3.81519e+08	0.0664246	597.654	399.972	12957.7	-215.73	54.9609	23.9508	0.388797	3.62479	3.32408	10.5045	0.344964	0.256249	0.982934	0.914114	-0.176202	0.870755	0.265781	19.8037	0.00756964	7.47429	0.0205397	4.78334	19.7279	6.36335	98.6437	0.199684	2.93635	32.8138	23.8979	401.704	10.7854	4587.6
N160607-1.nii.gz	-224.018	27.9516	8.60719e+07	6.2716	127.554	3.51447	145.278	-93.9615	77.7797	-88.7616	-480.28	625.558	52.6245	228.952	-0.482836	6.88575e+08	0.015232	9967.06	6384.26	5.38736e+06	-22418.7	1216.96	326.257	0.575989	13.9403	5.15915	127.22	0.145055	0.0731713	0.981133	0.906578	-0.29555	0.987344	0.0776507	78.4951	0.000719269	10.6338	0.00269656	6.99422	385.805	7.36921	809.424	0.49295	0.514239	25.011	398.447	6593.63	2.65773	17828.2
N160607-2.nii.gz	-37.0239	52.1599	2.35906e+08	4.90823	37.6757	4.81677	142.24	7.9444	28.2964	8.82286	-160.556	302.796	16.6148	310.493	-0.236093	1887245980	0.0448476	1576.35	1262.19	150607	-271.853	170.048	40.7923	0.608139	4.54069	3.68826	19.6028	0.323639	0.238136	0.989936	0.935594	-0.157094	0.872433	0.241283	35.0694	0.00398076	8.75932	0.0127321	5.56761	52.7101	7.33765	452.459	0.184904	4.35289	109.742	63.2453	1294.37	13.7094	17754.8
N160709-1.nii.gz	-189.808	-10.107	2.29496e+07	5.74354	95.4878	2.71414	108.91	-98.5195	55.7071	-98.858	-285.933	394.843	39.5111	212.967	0.0218334	1.83597e+08	0.0213486	4760.49	1477.16	719473	402.911	512.586	198.581	0.438584	10.9677	4.72325	74.6676	0.16844	0.0904389	0.971924	0.886986	-0.424137	0.995806	0.0963552	37.3857	0.00223012	8.93191	0.00644951	6.22304	177.792	6.71506	244.636	0.483471	0.506257	10.8024	190.509	1694.75	2.67984	4390.58
N160709-2.nii.gz	-7.44254	19.7935	6.33906e+07	3.14733	12.2663	5.39113	61.9393	5.09806	8.69304	3.00843	-21.2992	83.2385	5.4747	305.322	1.14477	5.07125e+08	0.143131	136.714	42.0175	934.041	49.4462	13.6745	5.02936	0.460896	1.59965	2.31943	2.39507	0.520447	0.464301	0.985666	0.923627	-0.118504	0.691401	0.428658	6.31305	0.0301991	5.69199	0.0713821	3.79081	4.67596	6.19469	65.8971	0.0969074	9.01419	97.3294	5.61743	48.0588	38.6206	1426.48
N160714-1.nii.gz	-190.621	-20.9637	7.70129e+06	5.5013	96.0068	2.64579	43.7753	-102.532	53.8639	-95.4536	-295.807	339.582	39.2816	208.004	-0.189785	6.16103e+07	0.025565	4272.08	1468.66	613536	-2825.02	484.806	258.952	0.315564	12.5112	4.51344	92.7373	0.152904	0.0780524	0.953586	0.858214	-0.679466	0.999634	0.0839291	37.5666	0.00757364	7.12668	0.0146127	5.47632	185.939	6.03943	101.764	0.571708	0.298321	4.55056	170.393	1770.39	2.05618	3484.45
N160714-2.nii.gz	-46.1565	53.8254	2.54376e+07	4.9195	60.4519	3.652	106.955	2.84404	34.402	4.11905	-161.557	268.512	24.7435	305.811	-0.430712	2.03501e+08	0.039495	1806.13	1198.07	150960	-1006.39	222.649	50.0772	0.634063	5.33624	3.70137	20.1987	0.27685	0.185839	0.984516	0.91646	-0.444843	0.993018	0.187679	33.9828	0.00640482	7.53478	0.0234627	5.45364	68.1816	6.25611	84.7426	0.311554	1.79066	10.7426	72.2257	1233.48	6.02941	7337.94
N160788-1.nii.gz	-202.886	33.8482	2.6571e+07	6.10935	117.357	3.50562	137.185	-85.6512	74.8907	-76.2795	-416.531	553.716	50.4729	234.79	-0.455653	2.12568e+08	0.0169419	9181.07	4366.77	4.20546e+06	-14581.3	1132.65	359.16	0.519698	14.3459	5.11137	147.69	0.146065	0.0742658	0.974223	0.894056	-0.488307	0.998675	0.075303	64.5984	0.00180871	9.20871	0.00594227	6.69479	372.953	7.00793	228.415	0.47389	0.532119	8.16598	367.672	4903.78	2.76349	13427
N160788-2.nii.gz	-11.3879	13.0806	1.28488e+07	2.96324	12.1062	2.99051	25.7233	-1.44521	7.6052	-2.84682	-22.6064	48.3297	5.08968	298.71	0.494103	1.0279e+08	0.151427	92.8598	27.6184	300.714	13.2567	10.1631	4.12259	0.430681	1.53079	2.12816	1.58085	0.515801	0.457122	0.969684	0.886857	-0.19131	0.802688	0.433354	5.10798	0.0343858	5.24689	0.0775794	3.55857	3.57142	5.23964	21.4444	0.14892	3.97049	21.8056	3.93441	30.9167	23.1111	602.639
N161142-1.nii.gz	-244.73	-8.28497	1.10695e+07	5.8946	103.538	4.19467	101.606	-120.252	69.5435	-113.866	-462.79	564.397	44.7846	202.48	-0.661273	8.85559e+07	0.019808	8688.78	4457.16	4.73546e+06	-26105.7	1127.62	497.858	0.397183	16.7706	5.12578	203.509	0.135395	0.0694029	0.966511	0.881517	-0.629945	0.999658	0.0728515	65.5579	0.00389439	8.07471	0.00924807	6.17449	406.369	6.48405	146.719	0.543402	0.359122	5.34815	348.319	5168.79	2.23704	11264.3
N161142-2.nii.gz	-33.3984	89.4268	5.16802e+07	5.25691	62.822	3.68088	188.756	31.2519	39.1537	33.4955	-144.124	332.88	25.9376	335.184	-0.0933424	4.13441e+08	0.0315595	2620.34	1449.11	351265	1001.58	316.876	105.511	0.50268	7.50147	4.2299	46.6473	0.233317	0.146917	0.978809	0.906313	-0.384817	0.990704	0.151845	37.3628	0.00339716	8.43528	0.011511	5.83798	105.597	6.61427	154.717	0.336342	1.00238	14.5174	105.631	1383.07	4.46522	6399.41
N161144-1.nii.gz	-100.278	24.5706	1.6439e+08	5.26862	63.2651	2.8816	137.632	-37.7203	37.7865	-36.1295	-170.56	308.192	26.2451	266.536	-0.0481852	1315120335	0.0302077	2250.86	807.504	209723	19.8901	271.549	86.6798	0.515679	7.26846	4.2594	32.532	0.222864	0.134586	0.979573	0.902279	-0.131334	0.860501	0.137965	27.5913	0.00139376	9.83803	0.00466688	6.03846	89.5572	7.02241	721.508	0.311801	1.12568	69.9006	89.9938	871.044	5.0363	4084.54
N161144-2.nii.gz	-62.8296	61.2464	2.02892e+08	5.30084	64.1989	2.99322	188.458	-0.701278	38.874	-0.710842	-161.438	349.896	27.3477	303.201	-0.000548788	1623135900	0.0294517	2351.4	1113.44	206019	-127.479	264.061	87.6944	0.498836	7.13876	4.24066	34.7837	0.231554	0.143842	0.983638	0.913672	-0.137024	0.861555	0.14923	32.7004	0.00147673	9.7816	0.0048364	6.01333	87.9388	7.15954	621.706	0.281697	1.262	65	94.084	1206.66	5.77209	6679.25
N161393-1.nii.gz	-80.7908	45.5316	4.20482e+07	5.19273	63.6313	5.24078	94.6964	-13.3101	40.3492	-5.91107	-246.576	341.272	25.8783	291.75	-1.22374	3.36386e+08	0.0333803	2926.8	2274.44	612720	-7278.28	348.598	107.102	0.528026	7.47531	4.24951	48.8047	0.229822	0.140544	0.979837	0.909077	-0.326655	0.982436	0.140202	47.0529	0.00296749	8.6433	0.00977228	5.8716	113.925	6.73372	156.769	0.317347	1.23246	16.4899	117.467	2407.11	5.04049	12733.4
N161393-2.nii.gz	-15.5773	20.9702	1.40251e+08	3.56688	17.9004	3.74814	58.376	1.62555	11.2248	0.858815	-50.5763	108.952	7.47654	301.978	0.309871	1122009309	0.103422	212.641	141.455	1984.07	47.7883	22.6033	7.81641	0.483604	2.09583	2.63451	3.30761	0.452718	0.38017	0.986034	0.921076	-0.0988903	0.677408	0.373682	11.737	0.0150957	6.62415	0.037282	4.23717	7.60492	6.49572	186.075	0.120985	5.97062	159.062	8.61248	148.492	25.9233	3594.55
N161395-1.nii.gz	-119.923	15.547	9.66526e+07	5.42313	66.6167	6.79513	78.6929	-50.2287	43.5664	-42.8009	-403.881	482.574	28.2705	256.592	-1.2915	7.73221e+08	0.0286169	3453.97	5184.21	1.5582e+06	-14712.3	468.312	108.157	0.624557	7.63461	4.34152	48.3553	0.222152	0.134161	0.98918	0.930802	-0.216027	0.949681	0.140914	71.3729	0.00155965	9.67171	0.00525725	6.20392	144.117	7.07316	475.294	0.32377	1.1394	42.0095	138.562	5245.46	4.86104	26446.6
N161395-2.nii.gz	-58.6219	31.6528	5.64439e+07	4.82451	50.3968	3.5229	69.836	-12.3182	29.059	-10.7613	-163.943	233.779	20.2225	290.033	-0.557712	4.51551e+08	0.0415311	1358.27	1026.83	87213.3	-1077.5	154.42	45.3915	0.542209	5.19177	3.76606	17.3446	0.274592	0.18226	0.980816	0.906138	-0.215162	0.930441	0.191422	31.6151	0.00340772	8.51241	0.00937516	5.51358	49.9528	6.6024	176.013	0.262315	1.39398	27.8674	54.3908	1017.52	6.50522	7187.22
N161580-1.nii.gz	-206.571	25.836	1.31255e+08	6.22428	112.781	5.29657	166.515	-86.8734	74.6608	-75.7719	-605.49	772.004	47.7793	235.632	-1.02874	1050041873	0.0165433	10099.6	11105.6	9.76302e+06	-55023.5	1345.23	357.246	0.581371	13.9629	5.19494	158.093	0.150534	0.0775729	0.986291	0.922451	-0.252018	0.978172	0.0802869	104.205	0.000625484	10.9086	0.00243481	7.00958	425.619	7.45732	1073.48	0.454093	0.592282	39.1083	403.967	11452.9	2.94755	33921.2
N161580-2.nii.gz	-34.8272	35.8939	2.0845e+08	4.58057	33.4656	7.93997	127.691	1.68887	22.9022	3.61479	-212.03	339.72	13.9858	303.433	-1.15259	1667601142	0.0544948	1055.45	1954.07	91735.7	-1285.93	106.586	35.77	0.493535	4.06219	3.53322	18.8834	0.346137	0.26115	0.992889	0.947408	-0.131346	0.819601	0.262578	44.0041	0.0050986	8.32065	0.0166553	5.23512	35.5889	7.12769	377.787	0.166867	4.5765	123.376	42.2604	1963.91	15.0645	30149.6
N161583-1.nii.gz	-279.706	17.0091	4.26981e+07	6.45944	140.329	4.04524	163.189	-132.11	91.264	-122.573	-617.472	780.662	59.417	206.429	-0.716844	3.41585e+08	0.0137729	14425.9	9580.91	1.5978e+07	-71431.9	1971.57	475.057	0.613101	16.6776	5.37013	188.826	0.130337	0.0643076	0.982056	0.909338	-0.436472	0.998167	0.0669951	95.9499	0.000988501	10.0939	0.00286082	7.12548	611.656	7.34212	534.21	0.533143	0.395413	13.8004	576.812	10195.5	2.32535	23170.4
N161583-2.nii.gz	-12.673	35.9461	6.47661e+07	4.03763	27.289	4.11004	85.6988	12.5866	15.935	12.9637	-73.6335	159.332	10.9252	313.258	-0.220664	5.18129e+08	0.0731175	420.049	342.558	5928.52	-25.8001	40.3354	18.3126	0.371626	3.15564	3.1272	8.12614	0.368839	0.280744	0.984573	0.917844	-0.141669	0.813982	0.282443	18.3587	0.00837281	7.30697	0.0202951	4.6137	14.662	6.32924	124.927	0.189284	2.72107	48.2576	17.0786	341.515	12.2	4326.03
N161662-1.nii.gz	-157.443	18.9095	7.49769e+07	5.80006	100.419	3.48429	103.005	-71.5047	57.1562	-68.9758	-370.025	473.03	40.5522	239.42	-0.420782	5.99815e+08	0.0207392	5111.69	3781.66	1.26227e+06	-6255.82	603.001	172.615	0.553229	10.0234	4.69734	68.9898	0.183939	0.102718	0.982535	0.910748	-0.262735	0.975119	0.105877	60.6129	0.00114638	10.0011	0.00427217	6.50846	193.904	7.14378	537.575	0.41099	0.882205	27.1269	204.602	3951.11	3.63456	14560.2
N161662-2.nii.gz	-9.94055	17.6112	2.33365e+07	3.08764	14.8188	2.83624	36.3541	2.92463	8.46232	3.36224	-24.8194	61.1735	5.99837	303.11	0.245818	1.86692e+08	0.137454	112.551	36.3418	411.514	9.43752	12.0761	4.31276	0.471073	1.526	2.24236	1.91817	0.527257	0.472456	0.976755	0.9026	-0.159435	0.7738	0.433716	5.86484	0.0292945	5.56041	0.0720462	3.74463	4.09721	5.98652	26.8268	0.105617	8.94067	34.9134	4.53904	41.6339	35.8661	1310.81
N161701-1.nii.gz	-252.325	24.0721	4.79328e+07	6.39733	139.879	4.54545	190.883	-105.367	88.8094	-87.3869	-639.53	830.412	58.1882	226.782	-0.797196	3.83463e+08	0.0145287	13547.9	11447	1.44419e+07	-48939.9	1864.36	482.742	0.590089	16.8425	5.39412	192.562	0.127818	0.0610111	0.983739	0.91329	-0.423749	0.997853	0.0627506	105.363	0.000947282	10.1605	0.00311038	7.13279	586.775	7.28558	491.708	0.527584	0.467199	13.5408	542.419	12083.9	2.45494	29239.3
N161701-2.nii.gz	-28.1013	59.3491	1.16865e+08	4.91899	46.5001	5.02899	155.506	13.1186	29.4128	11.2485	-201.217	356.723	19.3636	315.507	-0.114185	9.34924e+08	0.0407408	1501.44	1969.73	109351	281.541	159.108	45.9874	0.546978	4.89369	3.74469	21.315	0.297457	0.207105	0.991803	0.940229	-0.184828	0.907402	0.214635	44.0615	0.00319156	8.73515	0.00950519	5.57748	51.2739	7.04919	258.072	0.219822	2.41349	47.8296	59.996	2007.11	9.18058	17587.6
N161730-1.nii.gz	-188.388	60.8499	2.3595e+07	6.03317	144.937	2.68485	188.969	-66.6336	80.1142	-63.8143	-320.179	509.148	57.2109	253.213	0.0561868	1.8876e+08	0.0178403	9656.86	2858.17	3.19728e+06	3476.55	1092.86	417.096	0.446192	16.2053	5.21291	147.916	0.126629	0.0597235	0.964681	0.872763	-0.52306	0.999039	0.0610082	51.857	0.00224687	8.86883	0.00550204	6.55879	377.49	6.67203	208.636	0.566945	0.455813	6.56522	386.526	3106.38	2.33152	7073.6
N161730-2.nii.gz	-10.8423	57.9081	5.48396e+07	4.37886	32.0946	3.35993	102.712	21.4964	20.3687	19.9342	-47.9803	150.692	13.4086	322.583	0.364164	4.38717e+08	0.058125	700.081	234.944	20584	313.575	76.3161	23.1619	0.528066	3.60559	3.31467	9.77148	0.3464	0.257639	0.977916	0.90268	-0.19679	0.899092	0.262796	14.888	0.00640636	7.7327	0.0214442	5.03281	24.8695	6.51103	105.228	0.199673	3.28445	30.6319	28.1483	246.425	12.0133	2643.66
N161784-1.nii.gz	-158.264	40.9097	1.47839e+08	5.97783	105.906	2.9983	179.791	-58.7119	62.5896	-56.0668	-363.425	543.216	43.9917	253.641	-0.0586756	1182712049	0.0184548	6113.83	3906.51	1.70132e+06	-1582.84	742.181	194.854	0.58286	10.8067	4.81942	75.1927	0.1719	0.0926605	0.984494	0.914375	-0.198874	0.950697	0.0955273	61.3973	0.00072631	10.7098	0.00262903	6.73732	234.259	7.42901	879.316	0.382644	0.728637	42.4091	244.567	4058.78	3.62663	14419.3
N161784-2.nii.gz	-37.0738	19.255	2.722e+08	4.24383	25.5745	7.83393	88.7899	-6.81838	18.0157	-4.17246	-248.18	336.97	11.0923	294.241	-0.851262	2177598039	0.0693376	622.065	2446.69	24497.3	-347.494	65.2083	21.7439	0.496862	3.18768	3.2127	11.3573	0.386516	0.30583	0.995507	0.957165	-0.113039	0.764375	0.309577	49.3541	0.00793373	7.81846	0.0236593	4.93951	21.738	7.0315	439.172	0.139686	5.87129	217.997	24.9339	2439.57	20.2939	51007.3
N161788-1.nii.gz	-453.722	0.165673	2.108e+07	6.74172	217.688	3.74058	190.964	-184.888	138.97	-146.769	-784.384	975.348	93.6414	212.233	-0.972434	1.6864e+08	0.0113686	31792.1	14457	6.01803e+07	-248589	4165.82	1025.96	0.604451	24.1177	5.76326	426.272	0.105517	0.0495693	0.975688	0.897802	-0.612352	0.99986	0.0523136	116.924	0.00165178	9.29206	0.00425752	7.21699	1297.95	7.27133	285.064	0.609111	0.401545	5.32051	1271.25	15797.7	2.1453	35205.5
N161788-2.nii.gz	-63.5616	45.5478	1.19553e+08	5.09291	54.242	3.07326	127.82	-8.80533	33.0417	-9.30912	-143.532	271.352	22.4778	294.227	-0.000294787	9.56421e+08	0.0347863	1775.22	806.773	131123	207.379	206.331	55.5112	0.572948	5.64494	3.92269	22.7035	0.263779	0.172	0.982874	0.912223	-0.169436	0.898823	0.181599	27.7317	0.00223122	9.21353	0.00719893	5.81965	65.4604	7.07358	354.492	0.256692	1.67082	48.0398	71.0726	840.623	6.92324	5625.69
N161789-1.nii.gz	-203.738	-5.09659	3.39035e+07	5.90724	105.227	3.19812	107.044	-101.167	62.5058	-99.5232	-359.395	466.439	43.2252	214.046	-0.39863	2.71228e+08	0.0195654	6280.92	2685.9	1.78637e+06	-9368.22	753.478	246.226	0.508103	12.2111	4.92613	93.6141	0.15625	0.0807518	0.974525	0.891986	-0.36386	0.993098	0.0871149	50.5859	0.00137297	9.65314	0.00440647	6.56681	249.926	6.93915	350.665	0.473871	0.509343	14.4784	250.987	2983.31	2.72703	7979.56
N161789-2.nii.gz	-36.7054	35.9515	2.70132e+07	4.53545	36.8707	4.15718	84.0424	-7.09805	24.226	-10.0078	-122.643	206.686	15.2121	294.719	0.0374773	2.16106e+08	0.055779	1067.59	594.82	55572.1	422.432	114.366	35.952	0.517049	4.38321	3.49344	15.4745	0.315549	0.226139	0.981335	0.911751	-0.320158	0.967946	0.236928	23.9832	0.00751485	7.42475	0.0229855	5.06118	37.5795	6.20263	76.8778	0.247196	2.12663	17.3473	43.0968	623.736	7.68167	4190.71
N161799-1.nii.gz	-226.979	67.3281	3.30399e+07	6.37438	155.88	3.28157	184.562	-83.8271	91.9386	-78.4067	-473.43	657.992	63.9952	245.544	-0.424152	2.64319e+08	0.0139592	13561.1	5961.34	8.74581e+06	-15171.1	1671.94	547.071	0.516101	17.8084	5.31008	193.394	0.123757	0.0578946	0.971741	0.889265	-0.536615	0.999417	0.0610518	75.3576	0.00166045	9.31388	0.00473284	6.88378	554.753	7.03888	316.54	0.577628	0.321501	7.64964	542.807	6742.36	2.07664	13528.8
N161799-2.nii.gz	-50.4764	28.8328	8.40212e+07	4.69485	45.775	3.26566	67.2791	-9.4848	26.1951	-7.09537	-122.966	190.245	18.4719	292.36	-0.446215	6.72169e+08	0.0444018	1075.16	588.033	57485.8	-731.573	130.996	32.3141	0.60207	4.34933	3.54653	12.6382	0.304972	0.213004	0.98025	0.905545	-0.178094	0.893062	0.227158	23.7348	0.00360363	8.47679	0.0108873	5.44897	40.8274	6.69481	231.875	0.235885	1.93787	43.647	43.0629	600.273	8.04374	5401.66
N161814-1.nii.gz	-248.918	30.7043	3.5062e+07	6.3052	147.26	2.48001	185.654	-118.419	84.8573	-123.555	-379.812	565.466	61.3716	209.089	0.232409	2.80496e+08	0.0143531	10746.6	2752.8	3.97382e+06	14415.7	1218.77	393.322	0.511639	15.6764	5.23926	138.966	0.130475	0.0629803	0.972241	0.886271	-0.423324	0.997426	0.0647038	50.4535	0.00117227	9.84049	0.00363268	6.88854	403.024	7.18084	419.234	0.522736	0.397404	11.5112	430.417	3219.89	2.3616	7109.85
N161814-2.nii.gz	-34.075	17.5353	1.06394e+08	4.05322	28.3812	3.19957	51.3212	-6.61915	16.6019	-4.09543	-86.3406	137.662	11.7632	294.107	-0.386013	8.51148e+08	0.0710225	426.494	308.279	6637.94	-114.473	46.9792	15.2589	0.507565	2.96995	3.06992	6.27229	0.375677	0.289158	0.983014	0.912336	-0.111193	0.754889	0.301473	17.3303	0.00764973	7.50822	0.0197988	4.75543	15.5595	6.53552	211.102	0.171628	3.24059	87.3577	17.2603	312.178	13.3561	4466.33
N161875-1.nii.gz	-139.134	37.6626	5.56355e+07	5.80755	89.0855	4.1387	231.461	-47.036	57.0212	-43.0407	-362.077	593.538	37.9172	263.713	-0.5384	4.45084e+08	0.0213312	5553.56	4245.25	1.679e+06	-8362.95	678.269	216.975	0.517116	10.6659	4.74405	95.8382	0.183479	0.102859	0.986022	0.923281	-0.351323	0.991423	0.110118	64.2639	0.00148793	9.57821	0.00455023	6.50382	223.811	7.03008	327.36	0.4092	0.701775	17.065	222.681	4330.85	3.375	14914.6
N161875-2.nii.gz	-47.6543	36.6742	6.17698e+07	4.75618	40.3988	5.84578	81.0991	-6.285	26.6733	-2.87406	-193.151	274.25	16.5226	296.001	-1.02331	4.94159e+08	0.0468045	1348.3	1498.49	135550	-2045.39	145.885	47.5405	0.506222	4.84397	3.72622	23.0902	0.314107	0.227535	0.986056	0.92562	-0.218666	0.928392	0.222774	38.3913	0.00479954	8.26844	0.0181109	5.35439	48.3563	6.88267	138.095	0.195879	3.44232	32.9972	54.3405	1517.38	11.5305	18121.2
N161877-1.nii.gz	-139.019	35.8908	3.42863e+07	5.73818	98.5288	2.51093	126.662	-54.6576	56.5658	-56.7227	-236.486	363.148	40.9958	254.826	0.082424	2.7429e+08	0.0211131	4743.2	1373.2	817615	3081.32	560.5	181.806	0.509635	10.7166	4.70033	63.6198	0.169805	0.0914075	0.969647	0.881125	-0.382187	0.993573	0.0976003	35.7535	0.00182556	9.23626	0.00594323	6.34653	185.577	6.8277	228.845	0.433418	0.655934	11.1477	190.019	1600.82	3.16288	4306.18
N161877-2.nii.gz	-29.6509	40.334	7.23591e+07	4.63405	35.6529	7.37609	106.193	3.58023	24.482	5.25016	-179.31	285.503	15.0088	305.559	-1.09759	5.78873e+08	0.0510552	1205.62	1403.74	105375	-1295.37	113.989	37.5075	0.491979	4.31786	3.5644	18.4053	0.322951	0.233224	0.98967	0.934636	-0.192429	0.900051	0.232465	37.2102	0.00490643	8.07996	0.0133694	5.19877	37.874	6.81556	149.046	0.192318	2.97498	39.5677	48.2022	1432.81	11.2323	15851.3
N161879-1.nii.gz	-111.976	41.4686	1.34831e+08	5.58432	76.1788	4.40124	139.402	-31.5628	48.1777	-24.8437	-370.51	509.912	32.6515	275.532	-0.681781	1078644661	0.0248471	3859.57	4931.15	1.01996e+06	-7744.43	498.461	116.574	0.619795	8.0507	4.41735	49.7261	0.215871	0.129158	0.98957	0.931035	-0.203896	0.944811	0.130772	69.5387	0.00124105	10.0075	0.0047602	6.38579	153.759	7.28941	562.534	0.316742	1.24043	44.1284	154.353	4940.41	5.1464	26844.8
N161879-2.nii.gz	-20.904	16.5847	1.43898e+08	3.63334	16.5722	6.00171	63.9949	-0.367233	11.7828	1.46208	-89.5413	153.536	7.1428	300.081	-0.855533	1151184618	0.106222	269.064	349.366	3806.39	-94.5898	26.8309	9.70958	0.464303	2.18725	2.71149	4.81348	0.454207	0.384642	0.990548	0.937767	-0.112233	0.718901	0.384237	18.5764	0.0168227	6.66399	0.0455373	4.30375	9.13511	6.56115	186.936	0.116981	7.36508	169.742	10.7695	350.131	28.0738	9992.12
N161896-1.nii.gz	-166.076	79.1275	2.19917e+08	6.27331	129.451	3.4847	227.089	-38.644	76.848	-36.2066	-494.966	722.055	53.7217	278.764	-0.350636	1759334326	0.0151407	9402.15	8645.98	4.6584e+06	-13023.5	1138.29	418.54	0.462919	15.9758	5.35507	156.201	0.131256	0.0638598	0.9813	0.906029	-0.20687	0.962132	0.0648694	92.0108	0.000467912	11.2902	0.00177308	7.02738	389.208	7.45524	1362.4	0.481412	0.496755	42.8481	375.909	8797.57	2.6742	23728.8
N161896-2.nii.gz	-43.9695	43.0096	4.44854e+08	4.89229	41.7242	6.13225	131.101	-0.204696	28.047	1.35019	-291.711	422.813	17.6628	302.235	-0.734257	3558828246	0.0430192	1468.47	3559.29	203825	-1935.76	174.505	51.2363	0.545116	5.10284	3.8281	24.3708	0.294132	0.204767	0.993359	0.946575	-0.111468	0.793945	0.212149	59.4009	0.00288052	9.14226	0.00895426	5.64927	56.4353	7.21547	1020.16	0.209478	2.84527	209.503	58.8374	3594.42	10.1741	36651.4
N161934-1.nii.gz	-194.007	27.2237	3.24014e+07	6.01095	113.544	2.90136	135.05	-84.2651	65.989	-85.1936	-340.676	475.726	45.8667	231.231	-0.156648	2.59211e+08	0.0182553	6926.18	2638	2.0537e+06	-2754.78	840.95	313.485	0.456455	13.9748	5.02188	108.813	0.139545	0.0676033	0.96976	0.881802	-0.451743	0.997624	0.0698243	50.0548	0.00170493	9.29868	0.00443513	6.58136	288.609	6.86869	326.581	0.538912	0.369996	11.0627	276.958	3047.43	2.26403	6658.17
N161934-2.nii.gz	-44.4186	50.6466	4.8465e+07	4.91819	55.7932	2.77952	109.042	4.08357	30.9036	4.48863	-104.18	213.222	22.0004	306.471	-0.0584563	3.8772e+08	0.0382865	1457.56	554.819	75511	72.0451	165.579	53.7086	0.508314	5.60502	3.86555	21.2154	0.266837	0.175361	0.973645	0.89226	-0.251146	0.954747	0.17673	22.9527	0.00335879	8.4993	0.0105055	5.57227	54.8218	6.69475	131.14	0.254146	1.67517	19.7558	58.6728	556.585	7.01163	4059.63
N161937-1.nii.gz	-177.857	15.5773	5.20366e+07	5.8858	97.9846	3.448	105.273	-82.7587	59.6635	-81.6189	-377.495	482.768	41.3516	229.962	-0.362336	416292997	0.019877	5688.96	3608.05	1.53503e+06	-4391.63	670.216	249.682	0.457317	12.1552	4.92826	96.6856	0.157683	0.0817923	0.976309	0.896383	-0.303313	0.985694	0.0877086	59.1851	0.00111947	9.98433	0.00360787	6.56607	229.975	7.00782	438.404	0.445533	0.534933	19.5589	227.642	3822.28	2.90854	11386.2
N161937-2.nii.gz	-22.6098	38.7132	8.60428e+07	4.30205	26.6813	11.2536	95.3946	4.58832	19.7288	2.24391	-214.271	309.665	11.5508	305.985	-0.930486	6.88342e+08	0.0677263	852.494	1979.53	45841.3	-45.2037	75.7784	30.1239	0.425406	3.44695	3.28618	17.9838	0.390299	0.313111	0.993072	0.951402	-0.179849	0.874187	0.314023	44.3634	0.00942557	7.5114	0.0296522	4.90055	26.4756	6.81473	135.814	0.147784	6.62943	62.2405	34.2123	2008.12	20.0686	38852.8
N161963-1.nii.gz	-349.02	-32.8418	4.32032e+06	6.07481	170.445	2.80531	44.9743	-190.93	101.853	-174.929	-553.973	598.947	72.4757	165.36	-0.404701	3.45625e+07	0.0167441	15447.6	4654.49	8.72259e+06	-19522.2	1699.97	876.978	0.32392	23.5341	5.15634	295.01	0.102491	0.0481084	0.947656	0.848223	-0.776388	0.999941	0.0428181	66.6239	0.00705096	7.21343	0.0127192	5.8184	644.237	6.26388	102.494	0.648694	0.396251	2.64557	619.518	5993.89	2.06329	10374.5
N161963-2.nii.gz	-36.3055	46.2905	1.80339e+07	4.62677	45.9709	3.70134	77.1135	3.60038	27.5515	6.57153	-124.54	201.653	18.142	305.679	-0.649226	1.44271e+08	0.0482966	1266.58	710.133	66889	-1008.9	137.969	53.1432	0.444881	5.67068	3.69787	18.6781	0.264015	0.173397	0.97127	0.886286	-0.446624	0.990438	0.170498	26.2461	0.00883246	7.03665	0.0267586	5.04174	47.7782	5.80604	68.057	0.352627	1.79189	9.32124	50.3888	738.839	5.48705	4466.42
N161980-1.nii.gz	-65.876	32.3415	2.73345e+06	4.32172	58.1072	2.32343	58.1558	-23.2682	32.1613	-29.1883	-100.254	158.41	22.5884	279.461	0.291313	7.87231e+07	0.0546939	1518.08	356.802	81624.6	444.247	192.905	61.0988	0.517992	6.33393	3.41572	19.4775	0.2223	0.126556	0.951162	0.849532	-0.675488	0.998298	0.139267	17.9902	0.0209258	5.62461	0.0380952	4.31794	63.501	4.32172	22.6571	0.647347	0.176327	1.91429	61.0939	345.257	1.68571	608.914
N161980-2.nii.gz	-10.9404	29.0413	3.93998e+06	3.35779	19.2915	2.39732	42.7301	9.61761	12.6036	8.2651	-16.5442	59.2743	9.1184	309.995	0.23203	3.15198e+07	0.107674	233.913	54.4014	1110.8	-14.2594	19.9408	19.4359	0.0262084	3.6095	2.8407	5.60884	0.319732	0.22031	0.908975	0.799989	-0.476294	0.975665	0.215289	7.36122	0.034313	4.97409	0.0566468	3.4567	9.84418	4.19232	11.4878	0.28019	1.09816	4.41463	9.21356	50.0488	6.02439	368.195
N161997-1.nii.gz	-188.826	36.2945	4.74984e+07	6.08266	125.174	2.89033	152.055	-73.7408	71.3695	-70.04	-376.546	528.601	50.8013	243.059	-0.375424	3.79987e+08	0.0168375	7884.38	3779.52	2.85503e+06	-8288.06	1011.64	294.962	0.549214	13.215	5.02999	113.99	0.153598	0.0806766	0.97637	0.896828	-0.397554	0.99591	0.0851024	60.001	0.00126295	9.75557	0.00425281	6.7719	326.65	7.10082	384.348	0.478045	0.590796	13.5373	314.993	4127.59	2.8408	11327.5
N161997-2.nii.gz	-26.5131	64.4152	4.6096e+07	4.8176	45.4935	4.62424	136.639	19.277	28.768	22.5308	-165.461	302.1	19.2009	321.488	-0.646258	3.68768e+08	0.0419474	1416.53	1499.86	67484.7	-731.181	134.088	49.9945	0.453459	4.98575	3.72006	24.4157	0.295749	0.204776	0.988089	0.930018	-0.265224	0.956008	0.207611	38.4555	0.00453353	8.11023	0.0140432	5.35989	46.0207	6.5281	106.637	0.239096	2.1624	18.7085	56.8034	1528.02	8.00448	12269.3
N162059-1.nii.gz	-218.284	19.5645	5.8729e+06	5.75641	117.777	2.53186	90.8289	-108.601	71.9369	-115.524	-323.625	414.454	50.4945	210.931	0.181943	4.69832e+07	0.0207759	7858.21	1690.47	1.66665e+06	7388.63	717.508	394.009	0.317968	15.5733	4.70933	117.834	0.129921	0.0607678	0.951953	0.855374	-0.69748	0.999773	0.064683	40.1032	0.00681968	7.25025	0.0130176	5.61501	277.879	6.06125	80.3788	0.60893	0.280762	2.74242	313.32	2232.69	1.93939	3329.8
N162059-2.nii.gz	-35.2468	88.4563	8.64264e+06	4.87108	50.3382	4.54866	128.967	19.9885	40.2894	26.7792	-160.228	289.196	24.0692	324.651	-0.870801	6.91411e+07	0.0398572	3005.45	1656.57	393132	-4366.11	271.541	152.523	0.289902	9.72857	4.05157	52.3115	0.183868	0.102782	0.961165	0.868148	-0.672637	0.999073	0.105608	40.3241	0.0133266	6.29953	0.0239222	4.76768	106.016	5.17317	42.5854	0.519334	0.786437	3.26829	121.272	1523.87	3.07317	4852.09
N162113-1.nii.gz	-142.479	-1.24717	1.40158e+07	5.21119	74.0583	2.62563	65.7182	-61.0489	43.1849	-53.4394	-198.594	264.313	30.8215	244.738	-0.510269	1.12127e+08	0.0314851	2799.11	830.153	278194	-2939.11	331.922	79.0717	0.60889	6.7168	3.99422	32.9364	0.233183	0.142427	0.975745	0.896559	-0.516857	0.997476	0.151807	27.685	0.00550222	7.63481	0.0146336	5.62617	102.748	6.19862	91.9402	0.392907	0.788882	7.36752	111.514	911.872	3.62393	3495.49
N162113-2.nii.gz	-10.019	37.2439	1.28546e+07	3.88976	23.1388	3.15886	58.808	13.8565	15.5527	16.1994	-44.2006	103.009	10.8445	314.455	-0.392714	1.02837e+08	0.0811834	375.908	146.457	5852.48	-120.011	44.3121	23.4592	0.312069	3.90447	3.24145	7.72996	0.308729	0.212069	0.953201	0.853734	-0.332856	0.961229	0.222377	11.8831	0.0130576	6.50476	0.0374267	4.39921	16.9428	5.36343	36.7077	0.282367	1.88899	10.5538	15.2393	165.585	6.66154	1105.74
N162170-1.nii.gz	-98.963	32.0061	2.39485e+07	5.28109	69.4241	2.94222	95.0464	-33.8791	40.8632	-32.6357	-190.055	285.101	28.3519	271.038	-0.183591	1.91588e+08	0.0296398	2641.26	1074.43	288804	-521.766	315.538	129.651	0.420802	8.93903	4.42173	46.8909	0.191613	0.106685	0.966475	0.877065	-0.413843	0.993391	0.111674	32.0612	0.00327832	8.38168	0.00906002	5.81602	111.297	6.28124	133.656	0.409989	0.603786	9.66258	105.635	1176.49	3.22699	3720.12
N162170-2.nii.gz	-53.8661	90.8017	1.20212e+07	5.07404	72.7481	2.88176	119.328	27.5462	44.2835	34.0145	-132.111	251.439	31.6256	332.094	-0.621239	9.61696e+07	0.0352664	2999.8	1297.77	302748	-4203.07	314.045	113.03	0.475053	8.25757	4.03872	40.55	0.199579	0.112389	0.962019	0.870504	-0.607431	0.998633	0.121103	35.3094	0.00924112	6.83851	0.0201727	5.15292	106.769	5.54806	46.7064	0.428499	0.502146	3.84404	119.779	1209.99	2.9633	4333.83
N162237-1.nii.gz	-153.935	27.2046	1.56878e+08	5.84623	93.13	7.20947	170.706	-62.5606	57.6478	-55.2831	-626.42	797.127	38.5642	249.506	-1.12585	1255023500	0.0209029	5875.7	12887.9	4.41017e+06	-25445.7	798.229	220.242	0.570006	10.7832	4.8236	100.648	0.179469	0.0993777	0.991935	0.940173	-0.204371	0.95305	0.102706	112.886	0.000819129	10.5635	0.00289923	6.67423	254.618	7.3251	994.001	0.394445	0.813716	52.6754	235.272	13228.3	3.65	48976.4
N162237-2.nii.gz	-34.9716	49.7984	1.78545e+08	4.85521	41.8527	4.79465	146.336	7.3826	27.4322	8.09356	-186.999	333.335	17.5584	309.576	-0.20157	1428362468	0.043548	1353.46	1621.63	92719.3	-350.699	139.822	43.9767	0.515194	4.72958	3.71908	21.002	0.307078	0.217581	0.990987	0.938388	-0.152637	0.866706	0.223945	39.9707	0.00347271	8.7474	0.0129586	5.51598	45.9496	7.07344	404.95	0.217364	3.09389	81.1299	54.2731	1652.21	10.0768	16764.3
N162254-1.nii.gz	-88.8563	28.2503	1.64909e+08	5.22229	55.5079	3.82586	135.809	-28.7356	35.5654	-27.1345	-222.499	358.308	23.0464	275.292	-0.275409	1319274509	0.033234	2201.17	1618.77	307464	-1572.39	279.526	63.4962	0.626759	6.04623	3.99651	25.195	0.253459	0.162519	0.988629	0.927179	-0.171863	0.902871	0.169826	39.5569	0.00193142	9.49307	0.00635263	6.01224	85.7555	7.14582	597.59	0.274628	1.5495	72.3171	88.122	1668.51	6.35478	10677.9
N162254-2.nii.gz	-19.5932	20.0794	1.03663e+08	3.74862	19.4556	4.94061	47.2547	0.672751	12.739	1.47121	-81.2378	128.493	8.23694	301.154	-0.747665	8.29304e+08	0.0923427	289.738	316.928	5360.95	-128.233	32.5555	9.89911	0.530706	2.30632	2.76989	4.47095	0.436162	0.36096	0.987234	0.925739	-0.131209	0.773459	0.359775	17.6426	0.0128564	6.85157	0.0304884	4.44254	10.6136	6.52756	155.359	0.135922	5.35143	105.548	11.7396	322.801	21.2187	7239.38
N162263-1.nii.gz	-265.127	94.0409	1.05093e+08	6.73027	202.025	3.42015	372.721	-85.6603	113.816	-81.8512	-754.147	1126.87	82.5844	256.447	-0.403576	840741241	0.0106579	19823.6	17555.4	2.06367e+07	-35276	2407.78	755.599	0.522538	21.1204	5.7188	295.627	0.107691	0.0479216	0.985982	0.918806	-0.365992	0.996326	0.0515457	130.927	0.000536192	10.9876	0.0018802	7.45217	790.845	7.53656	953.136	0.596456	0.341398	17.0313	792.203	18845.3	2.06508	38599.2
N162263-2.nii.gz	-48.506	27.2223	1.10502e+08	4.63992	38.9409	4.19237	86.1238	-7.55669	24.4762	-4.39659	-149.785	235.909	16.3412	294.164	-0.652456	8.84017e+08	0.049251	1009.51	868.938	51471.7	-769.046	114.615	33.4801	0.54481	4.1949	3.54126	15.2431	0.326391	0.238224	0.986478	0.9244	-0.15891	0.863452	0.244967	29.1316	0.00417421	8.40653	0.011592	5.3661	37.0239	6.97452	237.376	0.185886	3.31209	62.8935	40.5964	880.507	12.0509	11443.9
N162281-1.nii.gz	-201.682	-2.82946	4.86121e+07	5.97077	102.011	3.82965	103.665	-98.5565	62.5148	-92.7662	-423.414	527.078	41.7516	217.247	-0.551497	3.88896e+08	0.0192327	6616.68	4456.66	2.92823e+06	-16799.2	839.565	238.75	0.557688	12.0577	4.93228	89.7949	0.159097	0.0832677	0.980154	0.903419	-0.326596	0.98968	0.0824016	65.6228	0.00114231	9.96647	0.00403629	6.65428	269.579	7.15442	436.808	0.424085	0.623655	19.8097	264.413	4593.16	3.16505	14361.4
N162281-2.nii.gz	-39.0545	44.8566	1.75962e+08	4.84748	37.6311	5.82405	180.502	3.15109	27.1672	2.48868	-191.805	372.306	15.9467	305.611	0.169334	1407694716	0.0467243	1497.42	1656.67	163599	761.792	161.34	36.888	0.621736	4.2603	3.59515	18.2928	0.33357	0.247515	0.993847	0.949424	-0.174562	0.890382	0.25128	40.318	0.00432513	8.5654	0.0127254	5.52306	49.5571	7.27171	332.15	0.1763	4.27454	88.0287	60.1743	1670.55	13.8832	23078.6
N162365-1.nii.gz	-109.73	40.7601	1.81903e+08	5.65571	77.1274	11.1137	132.85	-35.5892	51.1695	-26.9011	-528.797	661.647	32.0138	274.392	-1.93494	1455227160	0.0247125	5378.05	9955.82	6.3583e+06	-42063.2	752.204	184.492	0.60796	9.51921	4.66129	91.4253	0.200064	0.116606	0.990301	0.936946	-0.187586	0.93709	0.121633	99.065	0.00102478	10.3112	0.00355657	6.48473	234.174	7.2885	795.962	0.329454	1.07818	59.7053	215.259	10091.6	4.66556	48820.4
N162365-2.nii.gz	-41.438	73.7162	1.28468e+08	5.19516	60.5159	3.39373	180.054	13.9918	36.0786	12.1414	-176.266	356.32	24.922	317.301	0.0658308	1027743611	0.0322828	2089.37	1585.43	184006	148.776	233.891	57.6992	0.599689	5.87255	3.95679	22.2256	0.251661	0.159265	0.989584	0.928768	-0.182586	0.914855	0.169595	39.26	0.00205367	9.25794	0.00638593	5.88885	72.8975	6.99436	355.812	0.278849	1.26438	41.1928	83.9143	1627.31	5.81505	9028.75
N162430-1.nii.gz	-188.487	32.2986	4.60299e+07	5.9458	110.93	2.64042	111.949	-71.1771	65.6063	-62.5162	-321.722	433.671	46.2678	242.925	-0.310176	3.68239e+08	0.0186522	6652.76	2631.71	1.82868e+06	-5737.15	861.524	234.7	0.574899	11.4424	4.8512	97.9609	0.177131	0.0992026	0.972885	0.893199	-0.36585	0.993471	0.0953386	49.7478	0.00133562	9.71123	0.00473167	6.69093	274.056	7.27937	296.344	0.379928	1.02018	14.5487	266.701	2893.92	4.06923	11995
N162430-2.nii.gz	-30.0415	15.751	6.42105e+07	3.90408	24.6384	3.56617	53.6665	-6.40224	14.4448	-6.11247	-75.299	128.965	9.87106	294.172	-0.132256	5.13684e+08	0.0799435	337.435	241.768	4640.38	-48.8199	38.3842	9.80694	0.587332	2.35168	2.77186	4.15721	0.426547	0.347364	0.987265	0.924062	-0.157025	0.822569	0.342124	15.3174	0.0104085	7.02599	0.0244547	4.6188	12.0478	6.64157	101.588	0.136911	5.17772	59.3181	13.6882	245.286	21.0701	5036.03
N162546-1.nii.gz	-60.3038	17.4782	2.36801e+08	4.68257	40.153	4.2268	121.186	-18.8286	25.0976	-14.7211	-166.527	287.713	16.9399	283.035	-0.491818	1894408924	0.047682	1051.28	965.484	72704.2	-760.764	132.128	38.5384	0.548273	4.68574	3.68968	15.9848	0.295762	0.203559	0.989427	0.929906	-0.112354	0.794601	0.209562	30.6933	0.00315352	8.84888	0.00986864	5.48957	42.6665	6.96462	632.295	0.213902	2.3464	140.948	42.0306	986.636	9.52503	9850.43
N162546-2.nii.gz	-45.4107	67.337	2.68278e+08	5.17517	54.9269	4.85148	161.062	13.2739	34.8268	16.6034	-255.873	416.935	22.9869	316.628	-0.67755	2146220525	0.0339669	2112.67	3087.01	283166	-2216.2	241.783	79.0144	0.506249	6.53141	4.14767	35.0886	0.247454	0.158026	0.989631	0.932282	-0.130953	0.851074	0.167594	55.1934	0.00185944	9.5916	0.00613831	5.90882	80.1994	7.13321	719.09	0.268718	1.57224	90.8954	84.7715	3126.73	6.4432	20623.1
N162559-1.nii.gz	-233.492	63.4944	3.39497e+07	6.3072	161.029	2.3401	139.307	-88.7736	89.2772	-89.8484	-372.254	511.561	65.1384	237.476	-0.0893878	2.71598e+08	0.0142217	11778.4	3093.53	4.80565e+06	5464.27	1379.81	387.174	0.561098	15.208	5.19043	146.62	0.138043	0.0692834	0.967442	0.880155	-0.465809	0.998526	0.0729163	53.3303	0.0013682	9.60856	0.00426199	6.92145	441.745	7.16767	295.475	0.490822	0.487743	8.56146	471.974	3807.9	2.62458	9217.79
N162559-2.nii.gz	-41.8659	40.6599	6.26475e+07	4.74002	37.6558	5.27081	105.159	-0.571907	26.1557	-1.02698	-180.063	285.222	16.4998	301.538	-0.633086	5.0118e+08	0.0471961	1268.1	1419.46	105692	-1169.03	133.876	42.8411	0.510092	4.84171	3.72381	18.7293	0.299361	0.209407	0.988317	0.928177	-0.210995	0.922824	0.211557	37.3723	0.00448693	8.26384	0.0150857	5.34802	44.1793	6.73191	150.147	0.21792	2.50064	32.5181	51.1524	1450.28	9.19739	13142
N162579-1.nii.gz	-85.663	28.0169	1.43006e+08	5.20156	59.5355	4.00974	133.89	-30.4228	36.0508	-30.4637	-271.18	405.07	24.7377	273.485	-0.144235	1144046759	0.0319404	2121.99	2470.96	200614	-317.391	240.54	80.5153	0.49642	6.80849	4.17709	32.9803	0.235877	0.146931	0.988667	0.926974	-0.137766	0.865489	0.152645	49.3046	0.00162777	9.6204	0.00533534	5.93519	80.2637	7.07101	539.828	0.282337	1.45659	61.0701	85.0387	2526.24	6.03243	15147
N162579-2.nii.gz	-18.4432	41.4643	1.93975e+08	4.28263	25.211	5.85413	106.171	10.8374	18.2251	11.0785	-135.981	242.151	10.9394	311.896	-0.516991	1551797726	0.0686176	659.282	949.862	22770.4	-181.821	63.6855	21.831	0.485178	3.2612	3.25494	10.9839	0.384863	0.304432	0.991711	0.942087	-0.120078	0.781176	0.301776	30.6495	0.00820114	7.78395	0.0268044	4.92288	21.3791	7.02145	282.595	0.141723	7.09462	136.823	26.2933	967.127	21.3932	20194
N162735-1.nii.gz	-154.33	47.0581	2.8716e+07	5.8037	113.142	2.47989	136.787	-49.4021	62.5615	-48.7313	-232.152	368.939	44.9963	262.104	-0.237363	2.29728e+08	0.0203063	5899.15	1363.79	1.28944e+06	-2487.68	722.187	207.2	0.552549	11.1084	4.71987	77.7769	0.167391	0.0883997	0.967294	0.879843	-0.454008	0.997321	0.0922799	35.1315	0.00220386	8.93235	0.00652946	6.41968	232.347	6.77494	181.177	0.433438	0.552048	8.48804	235.909	1651.5	3	4377.28
N162735-2.nii.gz	-11.522	52.7981	2.55318e+07	4.21762	32.364	2.58378	83.7307	21.2674	19.2641	21.3639	-33.207	116.938	13.629	322.161	0.00306962	204254796	0.061207	575.266	148.966	7597.67	-4.87379	53.4364	26.4174	0.331825	4.02295	3.37342	9.83567	0.309805	0.213877	0.959906	0.866558	-0.240696	0.928382	0.220306	11.9219	0.00776718	7.26873	0.0203135	4.70832	19.9635	6.06783	57.4715	0.233624	1.90574	15.0569	22.7921	161.093	7.89431	1361.34
N162774-1.nii.gz	-222.028	73.2237	1.03886e+08	6.52573	163.758	3.31896	295.158	-77.6122	95.2373	-72.146	-543.968	839.126	67.0743	252.455	-0.351902	8.31085e+08	0.0124288	14277.2	8885.35	1.03127e+07	-20404.6	1753.86	551.968	0.52026	18.1186	5.51184	212.225	0.121454	0.0579281	0.98193	0.908462	-0.328943	0.993167	0.0623495	92.6539	0.000567995	10.9182	0.00188711	7.25829	576.457	7.4945	885.869	0.543478	0.426076	20.2589	571.071	9399.69	2.34847	22557.3
N162774-2.nii.gz	-37.2831	47.1124	1.06531e+08	4.79472	40.1283	3.94768	122.764	4.21245	26.4555	3.68076	-156.214	278.979	17.0995	306.231	0.0548944	8.52248e+08	0.044944	1232.06	1124.44	63113	285.272	129.011	44.6967	0.480832	4.96159	3.76844	19.4285	0.291558	0.200903	0.987036	0.924287	-0.159339	0.875627	0.20852	33.2168	0.0036113	8.63586	0.0133685	5.45142	43.4268	6.83838	258.801	0.227818	2.27274	51.0563	49.4673	1160.66	8.58451	9805.61
N162804-1.nii.gz	-319.023	61.5045	41084354	6.67286	205.297	2.60989	223.505	-110.819	115.914	-97.5527	-482.23	705.736	82.9301	237.234	-0.378549	328674832	0.0114168	20490.5	5741.4	1.80744e+07	-28459.9	2715.14	791.956	0.550427	22.2958	5.69048	273.825	0.102624	0.0457218	0.964641	0.873079	-0.521528	0.99953	0.0446544	72.5273	0.00109293	9.90753	0.00346941	7.33214	876.774	7.34282	411.447	0.563625	0.287363	8.33425	818.686	6496.62	2.06027	13283.7
N162804-2.nii.gz	-19.2535	33.3411	4.22405e+07	4.18365	26.2398	4.24196	82.1527	6.15714	17.5971	6.34329	-73.7476	155.9	11.2106	307.062	-0.048975	3.37924e+08	0.0695253	554.738	296.132	15281.8	27.5161	57.2678	19.1495	0.49108	3.3153	3.18857	7.81028	0.36115	0.272538	0.982483	0.911575	-0.202826	0.892275	0.267324	16.9285	0.0088318	7.29167	0.0257889	4.74288	19.1043	6.38012	81.192	0.181232	4.20645	31.1473	22.2726	301.864	14	3764.14
N162827-1.nii.gz	-130.419	55.5473	2.39626e+08	5.87687	103.086	2.70546	166.003	-37.7274	59.1108	-36.6584	-278.437	444.44	42.6665	272.122	-0.151487	1917010764	0.0192817	5263.26	2434.88	1.17403e+06	-832.533	664.334	184.483	0.566	10.5643	4.7816	69.3235	0.176355	0.0970002	0.978812	0.900908	-0.157871	0.915852	0.0979352	48.1132	0.000668679	10.8325	0.00219235	6.67668	212.204	7.42586	1198.28	0.370297	0.839992	62.3956	210.67	2606.92	3.89061	10154.9
N162827-2.nii.gz	-41.818	57.1589	1.17404e+08	4.99427	49.2113	3.5438	119.694	9.55135	31.1368	12.8084	-128.375	248.069	20.8009	312.139	-0.281788	9.39233e+08	0.0380689	1608.73	844.653	96238.9	-550.761	166.13	55.9701	0.491524	5.6868	3.93417	22.8325	0.263501	0.171874	0.979382	0.904071	-0.169756	0.895795	0.176348	28.5849	0.00269177	8.94324	0.0103244	5.63706	55.525	6.80964	340.798	0.28282	1.45886	45.873	64.4205	871.876	6.21162	5526.24
N162859-1.nii.gz	-74.6212	33.414	2.7171e+08	5.14791	56.1718	3.42427	114.531	-20.2614	34.1497	-19.2574	-200.851	315.381	23.4167	283.109	-0.234573	2173680615	0.0334828	1896.81	1447.97	195291	-764.882	238.11	71.2739	0.539462	6.56129	4.12603	27.1635	0.235384	0.144857	0.983581	0.911775	-0.110646	0.815915	0.151941	37.5001	0.00154514	9.75064	0.00425362	5.95356	77.3459	7.03998	963.806	0.284309	1.25718	113.507	75.8134	1478.37	5.74808	8731.84
N162859-2.nii.gz	-55.8717	75.6112	2.4936e+08	5.42782	65.2473	4.93021	185.038	9.28873	41.3138	9.89707	-279.824	464.862	27.3355	314.069	-0.353619	1994881516	0.0284375	2979.8	3453.08	567122	-2137.21	340.955	87.828	0.586822	6.83256	4.2105	39.951	0.241017	0.151963	0.990595	0.935615	-0.163595	0.903769	0.160207	58.2218	0.00151625	9.81612	0.00509594	6.1554	107.196	7.31035	707.883	0.280017	1.49543	71.89	119.143	3525.67	6.13291	21439.8
N162873-1.nii.gz	-229.89	52.7769	3.04435e+07	6.2333	144.226	4.22325	153.646	-66.7168	92.8536	-36.2913	-535.261	688.908	60.7084	262.444	-1.14582	2.43548e+08	0.0162773	14455.7	8750.82	1.31345e+07	-77798.7	1957.45	609.96	0.529353	18.4644	5.41255	255.418	0.128814	0.0642015	0.971659	0.89136	-0.545024	0.999451	0.0690886	91.7231	0.00186994	9.14282	0.00547862	6.83154	641.852	6.96222	234.543	0.53064	0.42063	7.19457	577.838	9635.11	2.37557	23343.1
N162873-2.nii.gz	-35.0732	34.3989	3.76285e+07	4.47244	34.4545	4.48456	73.8883	-0.281839	21.9347	0.321964	-130.004	203.892	14.2316	301.116	-0.32991	3.01028e+08	0.0539933	840.157	770.561	24418.1	-87.3067	74.891	32.7648	0.377368	4.20444	3.50578	14.7003	0.319005	0.228577	0.982972	0.914671	-0.214895	0.916366	0.238006	27.5684	0.00615736	7.70097	0.018317	4.96364	26.914	6.38238	93.3084	0.22484	2.39846	22.4072	33.6298	784.918	9.03373	7314.46
N162946-1.nii.gz	-259.818	5.97727	2.38867e+07	6.28944	152.845	5.2229	126.242	-130.035	90.9828	-120.447	-640.75	766.992	60.2352	208.779	-1.07761	1.91093e+08	0.0153644	14700.6	10719.5	1.60219e+07	-73844.3	1665.37	438.317	0.57978	15.8578	5.23804	179.401	0.13662	0.0687078	0.983036	0.912434	-0.495756	0.998926	0.0739594	102.04	0.00163278	9.34961	0.00498175	6.80702	525.921	7.10025	291.248	0.531475	0.471602	8.41971	588.305	11297.9	2.4562	27661
N162946-2.nii.gz	-47.5103	35.836	33299157	4.64462	39.4696	4.10632	119.876	-5.9363	25.5471	-7.14759	-82.1468	202.022	16.5556	296.023	0.62413	266393256	0.048795	1155.9	271.856	60182.9	735.982	118.742	46.8453	0.428599	5.23541	3.774	18.5661	0.278193	0.187112	0.974589	0.894114	-0.257126	0.949741	0.192214	15.9329	0.00496612	7.96926	0.0162191	5.24146	41.3967	6.43011	97.6526	0.256981	1.88368	18.5421	46.1993	311.461	7.17368	1937.04
N162977-1.nii.gz	-199.23	37.5208	2.04477e+07	6.01789	134.554	2.76677	148.72	-73.2093	76.2961	-59.8613	-352.157	500.877	54.5784	245.235	-0.428812	1.63582e+08	0.017699	8706.27	3074.49	3.10929e+06	-8567.67	1088.98	336.131	0.531223	14.3507	5.00138	121.315	0.138918	0.0673612	0.97004	0.883516	-0.570429	0.999436	0.0774209	53.7133	0.00270079	8.5963	0.00593539	6.47008	356.279	6.61819	201.688	0.593201	0.300554	6.01765	347.074	3581	2.00588	7279.46
N162977-2.nii.gz	-51.5722	48.3463	1.23322e+08	5.02702	51.3494	3.7824	153.926	-2.09233	31.5874	-2.67276	-167.537	321.464	21.2928	300.686	0.15746	9.86576e+08	0.0367977	1663.02	1178.06	143432	687.581	198.062	75.1017	0.450858	6.54594	4.12767	31.085	0.242069	0.152092	0.983407	0.913703	-0.163911	0.896276	0.161105	33.8721	0.00211884	9.24727	0.00656914	5.7694	68.291	6.79193	408.452	0.299451	1.32198	50.1921	66.7379	1228.43	5.50587	6457.04
N163034-1.nii.gz	-279.529	41.0073	5.62944e+07	6.554	159.169	3.6043	233.726	-109.074	99.6948	-94.5083	-588.003	821.728	67.1053	229.802	-0.547114	4.50355e+08	0.0127759	16356.3	9058.39	1.53348e+07	-47342.2	2156.67	720.766	0.502148	20.4424	5.64802	288.317	0.115423	0.054596	0.975878	0.896843	-0.449718	0.998617	0.0521801	93.2664	0.00089893	10.2203	0.00289246	7.26341	719.359	7.41622	586.773	0.550444	0.370335	13.6191	654.379	10003.4	2.23077	22601
N163034-2.nii.gz	-31.7593	42.224	2.02308e+08	4.6511	36.6798	4.58411	133.17	5.11461	23.7078	4.90439	-140.283	273.453	15.3959	306.752	0.142606	1618460402	0.0497657	1001.61	948.662	58332.1	201.727	113.127	30.1337	0.575712	4.09196	3.51562	12.956	0.322925	0.232517	0.990773	0.93509	-0.133221	0.827338	0.240271	30.4616	0.0039364	8.53174	0.0107396	5.37701	35.8151	7.02841	415.251	0.19314	2.82581	106.996	40.1184	971.589	11.374	10705
N163035-1.nii.gz	-184.465	61.559	2.31729e+08	6.34828	128.581	4.64215	262.704	-56.6258	79.5944	-49.4775	-593.56	856.265	52.9857	264.672	-0.5859	1853835791	0.0149877	10820.2	11812.7	8.50959e+06	-29135.9	1358.7	425.662	0.523609	15.3468	5.33908	183.565	0.143224	0.0732711	0.986463	0.922589	-0.217347	0.967619	0.0763607	107.608	0.000467191	11.3499	0.00165516	7.12416	446.091	7.61357	1510.25	0.456544	0.59484	49.5792	432.786	12136.7	2.94015	35547.7
N163035-2.nii.gz	-42.2608	40.2658	2.66699e+08	4.79498	36.8207	5.94335	131.047	0.604427	26.3093	3.19038	-187.701	318.749	15.6461	302.892	-0.813096	2133591437	0.0480606	1380.68	1536.34	123347	-1226.71	142.176	41.3029	0.543818	4.50565	3.66447	20.3894	0.319535	0.230944	0.990811	0.938762	-0.132773	0.829263	0.232358	38.873	0.00395901	8.71097	0.0120907	5.47005	45.8698	7.21379	530.965	0.18265	3.63449	139.712	55.3685	1547.37	12.8129	20230.8
N163076-1.nii.gz	-136.273	40.8171	1.72091e+08	5.77259	94.9784	2.91257	139.921	-41.6061	55.9578	-32.1989	-271.71	411.631	39.6817	267.499	-0.449532	1376730602	0.0211194	4788.26	2341.14	1.03824e+06	-6422.5	598.647	167.268	0.563183	9.73091	4.66878	68.405	0.191854	0.109336	0.977801	0.901863	-0.183409	0.933774	0.110869	47.2571	0.000885989	10.4776	0.00334505	6.56463	191.479	7.37253	830.803	0.345448	0.976895	50.7921	191.244	2417.67	4.35301	11278.3
N163121-1.nii.gz	-81.3362	32.2153	549335282	5.22573	56.4348	7.44584	124.045	-24.1261	35.9147	-20.9073	-444.466	568.511	23.5755	280.057	-1.04561	4394682256	0.0327931	2325.24	7262.76	633592	-5424.98	284.578	80.4745	0.557975	6.73051	4.18306	33.9386	0.238041	0.148455	0.994005	0.946352	-0.0956584	0.77781	0.154096	84.9218	0.00148354	9.91658	0.00408554	6.00398	91.2631	7.24001	1871.73	0.267238	1.4619	229.683	93.0393	7262.71	6.38721	47050.7
N163121-2.nii.gz	-51.9973	41.6332	6.25112e+08	4.9757	43.7007	5.71595	187.36	-3.02729	29.8651	0.180347	-254.741	442.101	18.7342	299.778	-0.786771	5000895994	0.0407908	1673.8	2608.27	218724	-2284.38	195.779	61.3006	0.522395	5.58642	3.95619	29.0707	0.28014	0.190766	0.992589	0.943801	-0.0974001	0.764189	0.197619	50.741	0.00244398	9.39828	0.00763769	5.74261	64.2698	7.25735	1505.43	0.216422	2.3307	283.741	66.9909	2656.33	9.25647	25055.8
N163157-1.nii.gz	-73.0613	15.6955	6.17428e+07	4.76924	47.2622	3.03191	66.184	-24.5788	28.1531	-20.6407	-132.957	199.141	19.8289	277.637	-0.499397	4.93942e+08	0.0429628	1225.32	546.707	76417.2	-913.85	166.329	34.7061	0.654481	4.58693	3.57223	12.6305	0.292811	0.199629	0.980627	0.904889	-0.210598	0.925862	0.209013	22.6668	0.00341004	8.55128	0.0120002	5.59796	50.2587	6.64851	199.062	0.248517	1.73084	34.4132	49.0734	558.672	7.6392	4839.59
N163157-2.nii.gz	-18.2639	26.5629	6.89493e+07	3.82689	25.4502	2.79302	57.8805	3.91862	14.2888	4.05213	-54.9304	112.811	10.3452	304.424	0.00519359	5.51595e+08	0.0802658	307.302	155.33	3438.09	11.279	36.2493	10.1526	0.561482	2.47643	2.80166	3.847	0.411136	0.32811	0.981895	0.908049	-0.132496	0.780283	0.321498	12.1985	0.00938361	7.06804	0.0214341	4.5814	11.6005	6.45914	110.723	0.148821	4.10928	59.7177	12.2608	163.214	18.293	3025.1
N163353-1.nii.gz	-204.773	14.9102	2.135e+07	6.05169	117.529	4.51924	126.771	-98.9891	72.8839	-94.5543	-514.203	640.973	48.6529	222.309	-0.572939	1.708e+08	0.0179505	9015.86	6776.29	5.22814e+06	-22748.6	1045.83	354.431	0.493942	14.3685	5.05911	139.812	0.139643	0.0682366	0.9804	0.905589	-0.483259	0.998448	0.0746211	81.2584	0.00195216	9.08577	0.00545809	6.53671	350.064	6.7838	227.255	0.526052	0.440501	7.75463	360.335	7365.87	2.4213	17439
N163353-2.nii.gz	-18.4069	32.966	3.18395e+07	4.12218	24.8904	4.36583	77.6514	8.86474	16.8591	11.2572	-81.1878	158.839	10.7469	309.681	-0.487587	2.54716e+08	0.0726339	504.767	375.152	9611.28	-119.538	48.7092	21.6893	0.380353	3.51263	3.23585	9.04871	0.342946	0.251613	0.981628	0.909479	-0.214395	0.903911	0.261382	19.1934	0.00916555	7.16472	0.0270575	4.65323	17.5996	6.04003	70.6747	0.212876	2.32131	24.1145	20.4191	391.678	9.8012	3991.79
N163486-1.nii.gz	-155.9	36.4579	6.21343e+07	5.84004	103.348	2.96674	109.991	-54.7138	59.6617	-47.8487	-304.558	414.549	42.1062	256.283	-0.415424	4.97075e+08	0.0204868	5515.78	2661.95	1.38057e+06	-7359.03	688.462	224.145	0.509378	11.4336	4.8551	88.8175	0.167921	0.090293	0.970884	0.887181	-0.312195	0.986783	0.0956202	50.4561	0.0012249	9.86964	0.00390819	6.57216	228.152	7.04925	400.937	0.423823	0.664862	19.3805	220.46	2776.37	3.22622	9095.15
N163486-2.nii.gz	-48.9286	38.9365	1.02038e+08	4.81757	42.0677	4.26237	113.071	-2.81409	27.7925	1.27724	-151.338	264.409	18.1637	299.44	-0.785874	816303015	0.0435522	1344.75	1011.15	91386.4	-1270.74	145.922	39.6163	0.569029	4.74999	3.68369	16.4763	0.291101	0.198317	0.987177	0.923273	-0.168389	0.887151	0.206842	31.3778	0.00331802	8.64845	0.0101624	5.50473	46.3846	6.83545	261.705	0.229969	1.84745	49.5624	53.7084	1011.61	8.14587	8712.45
N170018-1.nii.gz	-167.29	66.1571	5.48457e+08	6.24606	124.886	3.3571	329.117	-45.4376	74.2986	-38.9543	-464.314	793.431	51.5235	271.327	-0.362678	4387656933	0.0155203	8816.4	7267.1	3.85826e+06	-12257.5	1067.13	319.656	0.538411	13.7945	5.17552	124.004	0.146801	0.0745665	0.987904	0.923879	-0.123783	0.881417	0.0775698	84.144	0.000386422	11.698	0.00137977	7.02789	346.695	7.62777	3265.34	0.4383	0.638435	115.626	352.813	7478.3	3.10228	23636.2
N170018-2.nii.gz	-27.7001	40.6355	9.16104e+08	4.53865	28.1182	7.85496	174.874	4.52733	21.9083	2.0554	-277.485	452.358	12.4889	306.214	0.503647	7328835549	0.0601044	1030.19	3307.91	99673.1	970.084	114.209	26.0587	0.624824	3.47676	3.3465	13.7165	0.37596	0.294893	0.996932	0.964581	-0.122114	0.79674	0.294522	57.3225	0.00651329	8.30755	0.0189804	5.2628	35.067	7.3882	1342.44	0.137405	6.56031	587.22	41.3002	3336.67	21.4534	69401.4
N170860-1.nii.gz	-75.7009	19.7781	6.55724e+07	4.91317	48.4357	3.28306	94.845	-25.8541	30.0736	-22.7031	-153.709	248.554	20.6148	276.773	-0.22703	5.24579e+08	0.0395804	1447.24	711.43	86992.8	-460.52	163.232	56.7616	0.482224	5.92268	3.94058	20.6893	0.249093	0.156821	0.978776	0.899877	-0.180414	0.907045	0.163559	26.1687	0.00266731	8.86811	0.0087877	5.61744	54.9985	6.70243	241.084	0.28164	1.34441	33.8808	57.8599	751.653	5.89486	4326.22
N170860-2.nii.gz	-19.0617	16.8545	102550430	3.57813	18.6328	3.72473	44.7863	-1.21898	11.3893	-0.832326	-64.1551	108.941	7.66556	299.141	-0.189837	8.20403e+08	0.101208	215.446	177.89	1919.91	-36.126	23.0406	8.79056	0.445908	2.22452	2.69265	3.73185	0.435792	0.358943	0.983173	0.913528	-0.100679	0.691083	0.360328	13.2033	0.0139992	6.65583	0.0298781	4.2562	7.95779	6.32556	158.365	0.138189	4.39132	115.984	8.69159	184.058	21.7016	3995.06
N170874-1.nii.gz	-295.706	69.5632	1.65486e+08	6.73142	176.958	3.93693	227.538	-92.9943	111.361	-68.1119	-764.8	992.337	75.1731	251.514	-0.823633	1323887193	0.0113457	20407.8	18077.5	2.55536e+07	-110009	2634.39	672.745	0.594033	19.1102	5.63713	296.542	0.123401	0.0594051	0.984244	0.917649	-0.298082	0.990847	0.0621941	132.616	0.000414672	11.4496	0.00163035	7.51376	826.784	7.78767	1347.84	0.515228	0.46369	29.6804	816.327	19013.9	2.49235	47943.2
N170874-2.nii.gz	-29.1177	37.7542	2.8051e+08	4.47219	26.2863	6.41998	145.393	3.9211	20.82	4.64933	-174.378	319.772	11.9	305.427	-0.332477	2244081727	0.0628564	917.703	1326.77	58112.6	-227.308	92.5621	22.8923	0.596125	3.25159	3.26482	12.0831	0.394759	0.317258	0.994778	0.954636	-0.146596	0.832351	0.307849	36.1849	0.00831445	7.94153	0.0265732	5.11527	28.8636	7.28695	393.243	0.130776	8.68136	189.009	36.8517	1353.14	25.5195	34251.2
N170893-1.nii.gz	-116.321	48.3519	3.6934e+08	5.74665	88.7665	3.47063	180.507	-34.2062	52.6799	-33.7098	-364.542	545.049	36.9273	273.932	-0.185938	2954719846	0.0217547	4392.23	4532.48	956068	-950.486	538.349	159.46	0.542807	9.81262	4.68901	60.7038	0.183108	0.101464	0.987401	0.921868	-0.115381	0.849506	0.104744	66.6164	0.000702231	10.8233	0.00220585	6.54303	174.452	7.38202	1726.31	0.350734	0.856911	107.076	175.8	4618.64	4.128	19033.8
N170893-2.nii.gz	-56.7653	53.4828	3.59433e+08	5.1825	52.6503	4.27805	161.217	0.275943	34.4428	3.15578	-208.683	369.901	22.2733	303.738	-0.412393	2875460630	0.0345012	2091.18	1871.96	225983	-1094.5	231.465	66.0697	0.553248	5.847	4.01929	31.0055	0.271643	0.182456	0.988946	0.931721	-0.127759	0.842453	0.189237	42.7856	0.00205989	9.54384	0.00682417	5.90788	74.3838	7.351	884.345	0.226988	2.17399	134.417	83.665	1894.48	8.45483	16330
TCGA-EJ-5542-1.nii.gz	-86.5215	36.8236	4.59377e+08	5.32804	47.8253	9.60645	217.026	-17.5696	40.929	-7.29884	-521.471	738.497	21.2749	289.24	-1.81032	3675019002	0.0360522	3893.1	10564.4	2.15105e+06	-19270.5	482.56	101.476	0.646818	6.57075	4.17194	56.77	0.270643	0.183384	0.995628	0.959802	-0.158963	0.895149	0.187545	102.319	0.00221588	9.7386	0.00722047	6.10897	146.009	7.54832	1198.94	0.218346	2.47397	197.963	155.827	10557.1	9.24003	100616
TCGA-EJ-5542-2.nii.gz	-17.8266	18.4493	4.88466e+08	3.66058	18.151	8.58953	77.39	1.70734	11.9853	3.46414	-156.34	233.73	7.46588	302.162	-0.951741	3907726086	0.102695	274.694	1081.11	4751.9	-100.885	28.3104	10.7959	0.445144	2.32686	2.8068	5.27428	0.441203	0.3676	0.995481	0.955603	-0.0800048	0.635772	0.359392	32.8136	0.0143132	6.8986	0.0361494	4.36147	9.77656	6.72974	617.715	0.115461	7.34677	549.416	11.097	1089.75	29.8587	33344.2
TCGA-J4-8198-2.nii.gz	-19.6479	26.4625	342034968	4.00377	20.8745	6.90798	130.638	4.34766	15.0374	4.32058	-98.6013	229.239	8.87685	305.116	0.68977	2736279744	0.0844294	468.574	466.252	21833.4	334.525	55.7934	15.4741	0.560199	2.6076	2.95221	8.43181	0.434421	0.362231	0.993414	0.950343	-0.137121	0.792022	0.352519	21.3582	0.0115216	7.36479	0.0321129	4.77692	17.8169	7.04284	421.332	0.114679	7.79737	310.194	18.8019	475.556	29.2428	13576.1
TCGA-J4-A67M-1.nii.gz	-204.264	50.5017	2.23287e+08	6.31175	128.981	5.01372	225.81	-61.3854	83.9069	-36.3796	-582.261	808.071	54.6494	262.761	-1.13284	1786295457	0.0160765	12106.7	11483.9	1.26765e+07	-72566.1	1601.46	301.559	0.681384	12.1967	5.0281	147.129	0.180459	0.103627	0.989323	0.934507	-0.241569	0.974989	0.10702	105.635	0.000638997	11.0658	0.00302211	7.12289	475.754	7.86369	1163.29	0.359706	1.1624	51.9913	484.451	11556.3	4.45022	55511.2
TCGA-J4-A67M-2.nii.gz	-19.5496	28.5	2.4786e+08	4.15796	23.8719	8.20119	155.83	5.64941	16.9657	5.55024	-135.042	290.872	10.1475	306.641	0.529408	1982877731	0.0744386	607.159	882.197	33437.7	398.548	63.5506	19.5928	0.524191	3.06844	3.15095	9.86317	0.3923	0.31175	0.994755	0.953546	-0.123463	0.771865	0.313127	29.5162	0.00854787	7.61568	0.021224	4.8545	20.7859	6.91119	358.82	0.136123	5.11379	196.22	24.4343	902.154	20.3285	17828.2
TCGA-J4-A67O-1.nii.gz	-127.178	41.9754	3.4413e+08	5.73368	62.6906	9.6799	214.663	-33.5227	56.9079	-18.2433	-596.608	811.27	28.1894	280.943	-2.05012	2753037140	0.0276079	7918.65	13222.3	1.01486e+07	-68730	1061.86	217.518	0.657497	9.1976	4.61055	130.208	0.229252	0.145116	0.992457	0.950171	-0.203901	0.94798	0.15067	114.066	0.00138308	10.2811	0.00512182	6.55965	319.844	7.61518	1186.75	0.27219	1.60687	120.371	316.892	13266.1	6.37248	87870.6
TCGA-J4-A67O-2.nii.gz	-48.7809	21.5166	2.93172e+08	4.42006	36.4093	4.1089	89.0768	-8.77905	22.4469	-2.33917	-137.099	226.175	15.394	292.614	-0.923236	2345375966	0.0572113	813.018	746.217	40036.7	-959.35	101.433	19.5404	0.67471	3.27058	3.23258	8.58544	0.368274	0.282659	0.991134	0.936752	-0.133668	0.814978	0.28489	26.9393	0.00558062	8.14039	0.0173057	5.21021	30.2435	7.10526	528.485	0.154347	4.47783	195.891	32.6407	747.5	17.3908	14384.3
TCGA-J4-A67S-1.nii.gz	-103.26	48.2006	3.60144e+08	5.57042	63.4818	6.67345	151.85	-22.4263	47.6323	-12.621	-385.142	536.992	27.7814	285.707	-1.45309	2881152938	0.0279732	4581.14	5684.42	2.22172e+06	-19966.3	578.525	112.136	0.670136	7.46458	4.3372	54.2104	0.235699	0.148166	0.991109	0.939347	-0.164934	0.908654	0.154151	74.6173	0.00134685	10.178	0.00471521	6.38439	172.665	7.52852	1198.21	0.271581	1.58921	123.418	183.169	5660.78	6.44878	37933.3
TCGA-J4-A67S-2.nii.gz	-21.2642	22.8625	3.55377e+08	3.93624	20.6681	6.4786	93.0679	1.71454	14.566	3.91545	-122.251	215.319	8.79381	302.408	-1.0252	2843014401	0.0858053	418.874	674.772	15484	-364.338	49.952	12.7334	0.590177	2.45753	2.89139	6.53818	0.441802	0.370025	0.993697	0.949747	-0.128289	0.775354	0.355364	25.7966	0.0115669	7.26898	0.0290169	4.70686	15.6714	7.04091	426.585	0.109775	7.81888	333.44	16.9459	684.263	30.5811	21765.1
TCGA-J4-A6G1-1.nii.gz	-164.954	49.7343	3.07656e+08	6.09857	94.9073	5.47514	302.382	-44.3162	68.238	-29.2106	-490.591	792.973	40.8464	272.604	-1.00581	2461247868	0.0195744	8938.83	8472.51	8.36911e+06	-48062.2	1250.68	233.401	0.685439	10.4751	4.81553	119.993	0.199405	0.118258	0.991396	0.942089	-0.219664	0.963839	0.126442	90.654	0.000784639	10.8941	0.00304092	6.96356	371.021	7.74494	1388.35	0.335349	1.0504	81.0382	357.666	8572.07	4.55652	41343
TCGA-J4-A6G1-2.nii.gz	-11.283	22.6353	2.66009e+08	3.53924	15.5701	5.23137	83.8072	5.58435	10.7009	5.57956	-56.6171	140.424	6.63702	305.94	0.205568	2128074965	0.112059	217.561	184.157	2606.21	5.68492	23.5831	7.69458	0.502214	1.93051	2.59831	3.8761	0.491574	0.429632	0.9913	0.941091	-0.112784	0.712143	0.395363	13.4232	0.0192833	6.54	0.058404	4.2624	7.81943	6.82838	263.525	0.0927252	11.2588	318.473	8.76596	194.299	43.639	8162.56
TCGA-J4-A6G3-1.nii.gz	-123.593	52.0875	2.91059e+08	5.79542	76.8785	4.84504	207.844	-27.5101	54.6046	-17.3514	-375.384	583.227	33.7085	282.425	-0.923989	2328472887	0.0233355	5513.32	5107.73	2.46766e+06	-18811.2	707.187	177.442	0.598318	9.55176	4.70343	84.0919	0.206797	0.124738	0.988027	0.929509	-0.172341	0.927415	0.128857	70.5356	0.000974438	10.5834	0.00399239	6.59414	221.157	7.57839	1137.74	0.311796	1.37428	85.1513	220.548	5261.43	5.34037	28803.9
TCGA-J4-A6G3-2.nii.gz	-10.2133	21.9895	3.04781e+08	3.48795	15.0237	5.89634	80.2575	5.32652	10.3848	4.79675	-82.3639	162.621	6.35318	305.669	0.189403	2438244235	0.117053	209.356	343.522	2586.78	18.1291	21.7253	6.72131	0.519881	1.80238	2.50797	3.40196	0.503431	0.444293	0.994387	0.952006	-0.114023	0.706506	0.411063	18.4328	0.0212177	6.36701	0.0535011	4.18447	7.11167	6.83715	293.482	0.0899699	12.0778	381.826	8.43359	353.036	45.7192	15340.7
TCGA-J4-AATZ-1.nii.gz	-62.4031	34.9761	5.14694e+08	5.05139	43.8949	14.6872	138.372	-12.3182	32.4243	-6.72725	-478.28	616.653	18.8521	291.77	-2.1775	4117555996	0.0402142	2368.95	8961.68	1.1882e+06	-10296	280.779	63.2787	0.627838	5.44877	3.91368	32.7534	0.284199	0.193853	0.996059	0.95961	-0.12653	0.835148	0.200995	94.3784	0.00247822	9.38737	0.00673083	5.82575	86.0144	7.30787	1302.49	0.215431	2.13819	243.135	94.8521	8937.41	9.08733	82716.9
TCGA-J4-AATZ-2.nii.gz	-21.3111	23.666	4.92139e+08	3.96608	19.571	6.37713	112.331	1.74916	14.4153	2.042	-118.008	230.339	8.53874	302.449	0.0452126	3937113179	0.0863643	423.122	625.198	18508.2	53.1697	52.661	10.9423	0.653982	2.32152	2.81428	5.4293	0.44705	0.376126	0.995202	0.954919	-0.140221	0.800284	0.367597	24.7945	0.0123307	7.27352	0.0352599	4.76261	15.9008	7.08998	588.147	0.109321	8.42238	464.64	17.0369	634.763	32.0803	20096.7
ZD3251212-1.nii.gz	-20.9317	33.8449	157275570	4.05939	23.3317	5.36324	108.553	3.9399	16.56	0.985752	-45.3538	153.907	10.167	304.791	1.20325	1258204560	0.0758905	518.098	136.726	20940.7	601.366	61.866	10.408	0.707564	2.34009	2.78507	4.78556	0.435266	0.360667	0.990326	0.935391	-0.175727	0.854119	0.362153	11.1292	0.0104568	7.22157	0.0282251	4.81402	18.0685	6.94658	215.777	0.127453	5.99051	128.483	20.7206	148.105	24.6184	2981.64
ZD3251212-2.nii.gz	-17.1029	20.9111	1.06945e+08	3.61083	19.4545	3.23066	52.9679	3.12659	11.8185	4.74912	-45.1462	98.1141	7.9589	303.504	-0.286695	8.55561e+08	0.100378	228.884	128.206	2397.23	-49.3706	27.3857	6.91561	0.593828	1.97841	2.55564	2.88624	0.46333	0.393009	0.98519	0.9187	-0.13405	0.764385	0.386471	11.0944	0.0152735	6.64365	0.0434877	4.3711	8.57532	6.53356	143.134	0.123285	5.89604	116.538	9.17497	132.919	26.6021	3600.23
[truncated: 1,083 more columns]
