# Supplementary material for: Multimodal deep learning model for predicting homologous recombination deficiency in prostate cancer: an international multi-cohort study
Source: Research Square preprint supplement (doi:10.21203/rs.3.rs-6488233/v1), 2025-05-07
Supplement: Supplementary file 2 [file 3082204117d6b69a32ed5e6b.docx]

Supplementary Table 9: Predictive performance of deep learning models with Radiology and Pathology Signature.

| Model | Cohort | AUC | 95% CI | Accuracy | Sensitivity | Specificity | PPV | NPV |
| --- | --- | --- | --- | --- | --- | --- | --- | --- |
| LR | Training | 0.930 | 0.801 - 1.000 | 0.971 | 0.889 | 0.983 | 0.889 | 0.983 |
|  | Test | 0.867 | 0.668 - 1.000 | 0.824 | 1.000 | 0.857 | 0.400 | 1.000 |
| NaiveBayes | Training | 0.887 | 0.768 - 1.000 | 0.956 | 0.667 | 1.000 | 1.000 | 0.952 |
|  | Test | 0.900 | 0.744 - 1.000 | 0.882 | 1.000 | 0.929 | 0.500 | 1.000 |
| SVM | Training | 0.945 | 0.837 - 1.000 | 0.985 | 0.889 | 1.000 | 1.000 | 0.983 |
|  | Test | 0.767 | 0.291 - 1.000 | 0.588 | 1.000 | 0.533 | 0.222 | 1.000 |
| KNN | Training | 0.950 | 0.905 - 0.995 | 0.838 | 1.000 | 0.828 | 0.450 | 1.000 |
|  | Test | 0.833 | 0.677 - 0.990 | 0.765 | 1.000 | 0.786 | 0.333 | 1.000 |
| RandomForest | Training | 0.930 | 0.823 - 1.000 | 0.926 | 0.889 | 0.932 | 0.667 | 0.982 |
|  | Test | 0.700 | 0.324 - 1.000 | 0.588 | 1.000 | 0.571 | 0.222 | 1.000 |
| ExtraTrees | Training | 0.888 | 0.804 - 0.972 | 0.706 | 1.000 | 0.661 | 0.310 | 1.000 |
|  | Test | 0.600 | 0.124 - 1.000 | 0.706 | 0.500 | 0.786 | 0.200 | 0.917 |
| XGBoost | Training | 0.890 | 0.764 - 1.000 | 0.838 | 0.889 | 0.845 | 0.444 | 0.980 |
|  | Test | 0.450 | 0.051 - 0.849 | 0.529 | 0.500 | 0.571 | 0.125 | 0.889 |
| LightGBM | Training | 0.741 | 0.615 - 0.867 | 0.632 | 0.889 | 1.000 | 0.250 | 0.972 |
|  | Test | 0.867 | 0.751 - 0.983 | 0.765 | 1.000 | 1.000 | 0.333 | 1.000 |
| GradientBoosting | Training | 0.937 | 0.813 - 1.000 | 0.985 | 0.889 | 1.000 | 1.000 | 0.983 |
|  | Test | 0.667 | 0.074 - 1.000 | 0.882 | 0.500 | 1.000 | 0.500 | 0.933 |
| MLP | Training | 0.876 | 0.719 - 1.000 | 0.779 | 0.889 | 0.763 | 0.364 | 0.978 |
|  | Test | 0.700 | 0.098 - 1.000 | 0.941 | 0.500 | 1.000 | 1.000 | 0.937 |

This table shows the performance of different machine learning models in clinical and pathology signature, including logistic regression (LR), naive bayes (NB), support vector machine (SVM), k-nearest neighbors (KNN), random forest (RF), extra trees, extreme gradient boosting (XGBoost), LightGBM, gradient boosting (GB), and multilayer perceptron (MLP). These models were trained and tested for a specific task. The metrics used for evaluation were accuracy, area under the curve (AUC), 95% confidence interval (CI), sensitivity, specificity, positive predictive value (PPV), negative predictive value (NPV), and the threshold that was set for each model.
