# Supplementary material for: Multimodal deep learning model for predicting homologous recombination deficiency in prostate cancer: an international multi-cohort study
Source: Research Square preprint supplement (doi:10.21203/rs.3.rs-6488233/v1), 2025-05-07
Supplement: Supplementary file 3 [file 453c92ac28dfcac15dfb91f7.docx]

Supplementary Table 4. Predictive performance of deep learning models with Radiology features.

| Model | Cohort | AUC | 95% CI | Accuracy | Sensitivity | Specificity | PPV | NPV |
| --- | --- | --- | --- | --- | --- | --- | --- | --- |
| LR | Training | 0.863 | 0.751-0.974 | 0.804 | 0.824 | 0.800 | 0.483 | 0.952 |
|  | Test | 0.822 | 0.641-1.000 | 0.696 | 1.000 | 0.611 | 0.417 | 1.000 |
| NaiveBayes | Training | 0.887 | 0.800-0.974 | 0.826 | 0.882 | 0.813 | 0.517 | 0.968 |
|  | Test | 0.789 | 0.586-0.992 | 0.696 | 1.000 | 0.647 | 0.417 | 1.000 |
| SVM | Training | 0.940 | 0.850-1.000 | 0.946 | 0.941 | 0.947 | 0.800 | 0.986 |
|  | Test | 0.833 | 0.627-1.000 | 0.783 | 0.800 | 0.778 | 0.500 | 0.933 |
| KNN | Training | 0.890 | 0.830-0.951 | 0.707 | 1.000 | 0.640 | 0.386 | 1.000 |
|  | Test | 0.728 | 0.453-1.000 | 0.826 | 0.400 | 1.000 | 0.667 | 0.850 |
| RandomForest | Training | 0.999 | 0.997-1.000 | 0.978 | 1.000 | 0.973 | 0.895 | 1.000 |
|  | Test | 0.694 | 0.429-0.96 | 0.565 | 0.800 | 0.500 | 0.308 | 0.900 |
| ExtraTrees | Training | 1.000 | nan - nan | 1.000 | 1.000 | 1.000 | 1.000 | 1.000 |
|  | Test | 0.783 | 0.444-1.000 | 0.913 | 0.800 | 1.000 | 0.800 | 0.944 |
| XGBoost | Training | 1.000 | nan - nan | 1.000 | 1.000 | 1.000 | 1.000 | 1.000 |
|  | Test | 0.622 | 0.326-0.919 | 0.696 | 0.600 | 0.765 | 0.375 | 0.867 |
| LightGBM | Training | 0.916 | 0.858-0.974 | 0.859 | 0.882 | 0.865 | 0.577 | 0.970 |
|  | Test | 0.672 | 0.415-0.929 | 0.739 | 0.600 | 0.824 | 0.429 | 0.875 |
| GradientBoosting | Training | 0.994 | 0.983-1.000 | 0.957 | 1.000 | 0.947 | 0.810 | 1.000 |
|  | Test | 0.478 | 0.165-0.79 | 0.609 | 0.600 | 0.647 | 0.300 | 0.846 |
| MLP | Training | 0.882 | 0.795-0.968 | 0.783 | 0.882 | 0.760 | 0.455 | 0.966 |
|  | Test | 0.833 | 0.621-1.000 | 0.870 | 0.600 | 0.944 | 0.750 | 0.895 |

This table shows the performance of different machine learning models in Radiomics Signature, including logistic regression (LR), naive bayes (NB), support vector machine (SVM), k-nearest neighbors (KNN), random forest (RF), extra trees, extreme gradient boosting (XGBoost), LightGBM, gradient boosting (GB), and multilayer perceptron (MLP). The metrics used for evaluation were accuracy, area under the curve (AUC), 95% confidence interval (CI), sensitivity, specificity, positive predictive value (PPV), negative predictive value (NPV), and the threshold that was set for each model.
