# Supplementary material for: Multimodal deep learning model for predicting homologous recombination deficiency in prostate cancer: an international multi-cohort study
Source: Research Square preprint supplement (doi:10.21203/rs.3.rs-6488233/v1), 2025-05-07
Supplement: Supplementary file 4 [file 4c761d62b3a25af41b777c62.docx]

**Supplemental Table 1.** **Main MRI sequences protocol and parameters**

| **Scanner** | **GE**  **Discovery 750w** | **Siemens**  **Magnetom Skyra** |
| --- | --- | --- |
| **Magnetic field strength** | 3.0T | 3.0T |
| **Axial T2WI** |  |  |
| Field of view (mm) | 200×200 | 180×180 |
| Section thickness (mm) | 3 | 3 |
| Matrix | 352×352 | 384×384 |
| TR/TE (ms) | 5654/118 | 5460/104 |
| Flip angle (°) | 110 | 134 |
| **Axial DWI** |  |  |
| Field of view (mm) | 320×320 | 224×280 |
| Section thickness (mm) | 3 | 3 |
| Matrix | 128×128 | 120×150 |
| TR/TE (ms) | 2469/100.7 | 5100/89 |
| b values (s/mm2) | 500, 1000, 1500, 2000, 3000 | 0,500, 800, 1500,2000 |

TR/TE: Repetition time/echo time.
