# Supplementary material for: Multimodal deep learning model for predicting homologous recombination deficiency in prostate cancer: an international multi-cohort study
Source: Research Square preprint supplement (doi:10.21203/rs.3.rs-6488233/v1), 2025-05-07
Supplement: Supplementary file 5 [file 5012d64327eb8247f08ab64c.xlsx]

## Sheet: Supplementary Table S4
ID	prob-0.5	prob-0.51	prob-0.52	prob-0.53	prob-0.54	prob-0.55	prob-0.56	prob-0.57	prob-0.58	prob-0.59	prob-0.6	prob-0.61	prob-0.62	prob-0.63	prob-0.64	prob-0.65	prob-0.66	prob-0.67	prob-0.68	prob-0.69	prob-0.7	prob-0.71	prob-0.72	prob-0.73	prob-0.74	prob-0.75	prob-0.76	prob-0.77	prob-0.78	prob-0.79	prob-0.8	prob-0.81	prob-0.82	prob-0.83	prob-0.84	prob-0.85	prob-0.86	prob-0.87	prob-0.88	prob-0.89	prob-0.9	prob-0.91	prob-0.92	prob-0.93	prob-0.94	prob-0.95	prob-0.96	prob-0.97	prob-0.98
DP712198	0.00476515	0.00544588	0.00680735	0.0115725	0.0163376	0.00953029	0.00816882	0.00816882	0.010211	0.0115725	0.012934	0.00884956	0.012934	0.00884956	0.0149762	0.010211	0.0149762	0.00816882	0.0190606	0.012934	0.0136147	0.00816882	0.0149762	0.012934	0.0142954	0.0122532	0.0156569	0.0149762	0.0204221	0.0197413	0.0251872	0.0108918	0.0238257	0.0204221	0.0204221	0.0163376	0.023145	0.0197413	0.0265487	0.0224643	0.0285909	0.0313138	0.0347175	0.0422056	0.0428863	0.0415248	0.0394826	0.0299523	0.0285909
DP715676	0.00625	0.0109375	0.00703125	0.0109375	0.0140625	0.0148437	0.015625	0.0117188	0.0125	0.00703125	0.0148437	0.0109375	0.0109375	0.00703125	0.0179687	0.00625	0.009375	0.00625	0.0140625	0.0125	0.0125	0.009375	0.0109375	0.00859375	0.0101563	0.0140625	0.0148437	0.0101563	0.0109375	0.00703125	0.015625	0.0148437	0.0171875	0.0140625	0.021875	0.0101563	0.0164063	0.0132812	0.0234375	0.0203125	0.0203125	0.0179687	0.0296875	0.0210938	0.0296875	0.0265625	0.040625	0.0460938	0.053125
N1300136	0.00085034	0.00119048	0.00102041	0.00153061	0.00221088	0.00119048	0.00119048	0.00102041	0.00170068	0.00187075	0.00136054	0.00170068	0.00238095	0.00136054	0.00204082	0.00187075	0.00238095	0.00119048	0.00187075	0.00170068	0.0037415	0.00136054	0.00102041	0.00170068	0.00187075	0.00119048	0.00153061	0.00187075	0.00357143	0.00323129	0.00442177	0.00204082	0.00340136	0.0037415	0.00408163	0.0042517	0.0047619	0.00408163	0.00714286	0.00442177	0.00782313	0.00680272	0.0085034	0.0103741	0.012415	0.0130952	0.0205782	0.020068	0.0384354
N130360	0.000963192	0.00178879	0.00144479	0.00151359	0.00227038	0.00158239	0.00199518	0.00227038	0.00151359	0.00178879	0.00199518	0.00171999	0.00171999	0.00123839	0.00213278	0.00116959	0.00247678	0.00165119	0.00288958	0.00213278	0.00206398	0.00178879	0.00254558	0.00185759	0.00337117	0.00233918	0.00268318	0.00282078	0.00316477	0.00233918	0.00371517	0.00337117	0.00385277	0.00343997	0.00515996	0.00515996	0.00639835	0.00481596	0.00970072	0.00736154	0.0109391	0.00935673	0.0122463	0.0118335	0.0147231	0.0153423	0.0246302	0.0235982	0.0441004
N131248	0.000799467	0.00106596	0.00213191	0.00159893	0.000532978	0.0011992	0.00106596	0.00133245	0.00159893	0.0011992	0.00173218	0.000799467	0.00159893	0.00213191	0.00133245	0.00133245	0.00226516	0.000666223	0.00173218	0.00226516	0.00199867	0.0011992	0.00133245	0.00133245	0.00226516	0.00173218	0.00333111	0.00226516	0.00426382	0.00333111	0.00453031	0.00226516	0.00493005	0.00386409	0.00639574	0.00333111	0.00746169	0.00679547	0.0083944	0.00786143	0.0101266	0.0115923	0.0147901	0.0107928	0.0210526	0.0186542	0.0263824	0.0334444	0.0494337
N131723	0.00325815	0.00388471	0.0047619	0.00363409	0.00626566	0.00388471	0.00350877	0.00488722	0.00526316	0.00526316	0.0056391	0.00463659	0.00488722	0.0047619	0.00451128	0.00501253	0.00413534	0.00426065	0.00614035	0.00438596	0.00551378	0.0037594	0.00501253	0.00413534	0.0056391	0.00513784	0.00513784	0.00513784	0.00451128	0.00626566	0.00576441	0.00413534	0.00463659	0.0056391	0.00701754	0.00363409	0.00701754	0.00488722	0.00601504	0.0066416	0.00789474	0.00614035	0.00626566	0.00639098	0.00839599	0.00802005	0.0117794	0.0139098	0.0224311
N131966	0.000904159	0.00271248	0.00241109	0.000904159	0.00195901	0.00241109	0.00256178	0.0021097	0.00316456	0.0022604	0.00271248	0.00105485	0.00301386	0.00150693	0.00195901	0.00286317	0.00331525	0.0022604	0.00482218	0.0021097	0.00256178	0.00286317	0.00241109	0.0045208	0.0022604	0.00316456	0.00346594	0.00316456	0.0045208	0.00316456	0.00346594	0.00346594	0.00527426	0.00316456	0.00617842	0.00542495	0.00632911	0.00617842	0.00858951	0.00753466	0.00843882	0.00843882	0.0150693	0.0123568	0.0195901	0.0189873	0.0301386	0.035865	0.0669078
N132039	0.000701754	0.000701754	0.000818713	0.00128655	0.000467836	0.000818713	0.00105263	0.00128655	0.00152047	0.00128655	0.00116959	0.00128655	0.00105263	0.000818713	0.00222222	0.000584795	0.00128655	0.000935673	0.00128655	0.000935673	0.00175439	0.00163743	0.00140351	0.0019883	0.00152047	0.00222222	0.00222222	0.00152047	0.0019883	0.00187135	0.00339181	0.00222222	0.00233918	0.0025731	0.00327485	0.00362573	0.00327485	0.00339181	0.00491228	0.00432749	0.00596491	0.00783626	0.0105263	0.00912281	0.0145029	0.0161404	0.0237427	0.0259649	0.0494737
N132136	0.000793651	0.00147392	0.0015873	0.00113379	0.000907029	0.00102041	0.00124717	0.000793651	0.000793651	0.00113379	0.0015873	0.000566893	0.000566893	0.000793651	0.00102041	0.0015873	0.0021542	0.00113379	0.0021542	0.00192744	0.00238095	0.00124717	0.00170068	0.00192744	0.00306122	0.00192744	0.00306122	0.00226757	0.00351474	0.00147392	0.00306122	0.00226757	0.00385488	0.00430839	0.00419501	0.00362812	0.00464853	0.00328798	0.00578231	0.00612245	0.00623583	0.00578231	0.00929705	0.00997732	0.010771	0.0108844	0.0198413	0.0190476	0.0344671
N132151	0.000981932	0.00130924	0.000981932	0.00163655	0.0018984	0.00176748	0.00157109	0.00183294	0.00144017	0.00130924	0.00196386	0.00163655	0.00150563	0.00104739	0.00235664	0.00170202	0.00183294	0.0018984	0.00216025	0.00157109	0.00320765	0.00222571	0.00248756	0.00229118	0.00307672	0.00222571	0.00261849	0.00274941	0.00366588	0.00353496	0.00360042	0.00425504	0.00458235	0.00353496	0.00608798	0.00490966	0.00667714	0.00549882	0.00706991	0.00733176	0.00909924	0.00798638	0.0124378	0.0112595	0.0200969	0.0178057	0.0295234	0.0318146	0.0607489
N132598	0.00075188	0.00197368	0.00197368	0.00197368	0.00159774	0.00225564	0.00234962	0.00197368	0.00300752	0.00263158	0.00225564	0.00263158	0.00328947	0.00338346	0.00319549	0.0018797	0.00319549	0.00263158	0.00319549	0.00319549	0.00338346	0.00357143	0.00338346	0.00319549	0.00366541	0.0037594	0.0056391	0.00432331	0.0049812	0.00479323	0.00592105	0.00582707	0.00770677	0.00573308	0.00855263	0.00695489	0.00864662	0.0093985	0.012688	0.0102444	0.0143797	0.0137218	0.0181391	0.0190789	0.0278195	0.0229323	0.0412594	0.0420113	0.0720865
N132761	0.0024535	0.00387812	0.00451128	0.00387812	0.00356154	0.00364068	0.00364068	0.00474871	0.00387812	0.00324495	0.00514444	0.00435299	0.00411555	0.00379897	0.004907	0.00451128	0.00585675	0.00482786	0.00506529	0.00387812	0.00601504	0.00474871	0.00474871	0.00498615	0.00443213	0.00498615	0.0057776	0.00403641	0.00617333	0.00451128	0.00736051	0.00759794	0.00720222	0.00641076	0.00720222	0.00593589	0.00918085	0.0082311	0.0102097	0.00759794	0.013059	0.0091017	0.0123467	0.0111595	0.015275	0.0136921	0.0188366	0.0235853	0.0395726
N140320	0	0.000755858	0.00188964	0.000377929	0.00188964	0.00188964	0.000755858	0.00151172	0.000755858	0.0026455	0.00151172	0.00151172	0.0026455	0.00226757	0.00188964	0	0.00226757	0.00415722	0.00340136	0.00113379	0.00340136	0.00415722	0.00566893	0.0026455	0.00529101	0.00755858	0.00869237	0.00718065	0.00793651	0.00491308	0.00566893	0.00566893	0.0128496	0.0102041	0.0109599	0.0113379	0.0124717	0.0185185	0.0196523	0.0173847	0.0245654	0.0279667	0.0294785	0.037037	0.0411943	0.0309902	0.0468632	0.0461073	0.0597128
N140398	0.00247748	0.00585586	0.00765766	0.00743243	0.00563063	0.00540541	0.00495495	0.00540541	0.00472973	0.00608108	0.00765766	0.00608108	0.00675676	0.00608108	0.00675676	0.00427928	0.00788288	0.00608108	0.00720721	0.00675676	0.00563063	0.00698198	0.00720721	0.00540541	0.00585586	0.00630631	0.00495495	0.00608108	0.0103604	0.00495495	0.00878378	0.00743243	0.00720721	0.00720721	0.00743243	0.00855856	0.00765766	0.0108108	0.0108108	0.00968468	0.011036	0.00945946	0.0150901	0.0112613	0.0175676	0.0128378	0.0175676	0.020045	0.0328829
N140460	0.000304445	0.000355186	0.000304445	0.000355186	0.000202963	0.000558149	0.000558149	0.000558149	0.000558149	0.000710371	0.000456667	0.00060889	0.000964076	0.000405927	0.000862594	0.000405927	0.000862594	0.000456667	0.0011163	0.000558149	0.00121778	0.000456667	0.000710371	0.00106556	0.00147148	0.000964076	0.00137	0.00131926	0.00177593	0.00157297	0.00167445	0.00152222	0.00167445	0.00208037	0.00268926	0.00268926	0.00380556	0.00324741	0.00563223	0.00492186	0.0072052	0.00756038	0.0110615	0.0117719	0.0179115	0.0183682	0.0311549	0.0363304	0.0721534
N140626	0.00340136	0.00415722	0.00472411	0.00434618	0.00491308	0.00472411	0.00547997	0.00604686	0.00604686	0.0058579	0.00566893	0.00491308	0.00642479	0.00415722	0.00623583	0.00302343	0.00566893	0.00359033	0.00642479	0.00453515	0.00661376	0.00453515	0.00623583	0.00472411	0.0058579	0.00680272	0.00699169	0.00623583	0.00529101	0.00699169	0.00869237	0.00604686	0.00963719	0.00566893	0.00812547	0.00793651	0.010393	0.00888133	0.00755858	0.0102041	0.010771	0.00547997	0.0122827	0.0111489	0.016062	0.0128496	0.0196523	0.0156841	0.0275888
N140627	0.00135135	0.0018018	0.00315315	0.00225225	0.00337838	0.00225225	0.00292793	0.00405405	0.00157658	0.00247748	0.00315315	0.00225225	0.00315315	0.00247748	0.00337838	0.0027027	0.00382883	0.00292793	0.00225225	0.00315315	0.00247748	0.0036036	0.00405405	0.00337838	0.00540541	0.0027027	0.0045045	0.00585586	0.00540541	0.00382883	0.00608108	0.00630631	0.00765766	0.00540541	0.00833333	0.00810811	0.0148649	0.0105856	0.00968468	0.0123874	0.0166667	0.0157658	0.0227477	0.0245495	0.0315315	0.0259009	0.0454955	0.0506757	0.065991
N140768	0.00150376	0.00208213	0.00300752	0.00150376	0.00208213	0.00254482	0.00242915	0.00138809	0.00323887	0.00150376	0.00242915	0.00127241	0.0021978	0.00370156	0.00196645	0.00161943	0.0021978	0.0021978	0.00161943	0.00242915	0.00161943	0.0021978	0.00323887	0.0021978	0.00300752	0.0026605	0.00347021	0.00208213	0.0026605	0.00242915	0.00289184	0.00242915	0.00323887	0.00277617	0.00393291	0.0026605	0.00370156	0.00427993	0.00543667	0.00347021	0.00532099	0.0048583	0.00555234	0.00555234	0.00960093	0.00855986	0.0124928	0.0149219	0.027299
N140833	0.00242588	0.00350404	0.00404313	0.00350404	0.00269542	0.00485175	0.00592992	0.00485175	0.00377358	0.00269542	0.00619946	0.00512129	0.00458221	0.00377358	0.00485175	0.00350404	0.00269542	0.00377358	0.00377358	0.00485175	0.00566038	0.00458221	0.00539084	0.00566038	0.00862534	0.00458221	0.00619946	0.00592992	0.00700809	0.00566038	0.00754717	0.00619946	0.00431267	0.00700809	0.00889488	0.00727763	0.00619946	0.00754717	0.0115903	0.0097035	0.0140162	0.00808625	0.0115903	0.0083558	0.0126685	0.00727763	0.0145553	0.0167116	0.0296496
N141003	0.000935024	0.00137704	0.00149604	0.00112203	0.00132603	0.00147904	0.00159804	0.00137704	0.00139404	0.00129203	0.00197205	0.00120703	0.00198905	0.00134303	0.00151304	0.00144504	0.00192105	0.00151304	0.00207405	0.00142804	0.00195505	0.00181905	0.00263507	0.00205705	0.00231206	0.00212506	0.00260107	0.00222706	0.00277107	0.00253307	0.00326408	0.00246506	0.00306008	0.00336609	0.00409711	0.0037401	0.00535514	0.00443712	0.00572915	0.00533814	0.0077182	0.00669817	0.00953725	0.00946925	0.0143994	0.0138214	0.0229676	0.0269627	0.0516643
N141022	0.000682404	0.00133953	0.00185766	0.00135217	0.00155436	0.00183238	0.00189557	0.00157964	0.00179447	0.001567	0.00241369	0.00181974	0.00237578	0.0019082	0.00246424	0.00205985	0.00275489	0.00208512	0.00318455	0.00264116	0.00317192	0.00276753	0.00398069	0.00332356	0.00387959	0.00387959	0.00461255	0.0040186	0.00506748	0.00449881	0.00631856	0.00587626	0.0064702	0.00631856	0.00780974	0.00695041	0.00875752	0.00811303	0.0103624	0.00985695	0.0124728	0.0109817	0.0145327	0.0124096	0.0172497	0.0168074	0.0243138	0.0235682	0.0403882
N141037	0.00158884	0.0013816	0.00221056	0.0013816	0.001727	0.00221056	0.00200332	0.00165792	0.00165792	0.00193424	0.0020724	0.00193424	0.00186516	0.00248687	0.00200332	0.00200332	0.00297043	0.00165792	0.00338491	0.00193424	0.00324675	0.00214148	0.00269411	0.00248687	0.00373031	0.0020724	0.00393755	0.00269411	0.00317767	0.00262503	0.00442111	0.00248687	0.00442111	0.00255595	0.00373031	0.00469743	0.00476651	0.00462835	0.00898038	0.00545731	0.00766786	0.00594087	0.00863498	0.0109837	0.0150594	0.0146449	0.0235562	0.0281846	0.0491158
N141090	0.000708489	0.00186783	0.00167461	0.00122375	0.00180343	0.0016102	0.00251192	0.00167461	0.00206106	0.00186783	0.00225428	0.00167461	0.00231869	0.0016102	0.00212547	0.00180343	0.00199665	0.00148139	0.00302718	0.00154579	0.00302718	0.00289836	0.00354244	0.00283396	0.003156	0.00251192	0.00405771	0.00360685	0.00412212	0.00508824	0.00483061	0.00521706	0.0063764	0.00470179	0.0063764	0.00611877	0.00817983	0.0087595	0.0104341	0.00863068	0.0139121	0.0123664	0.0151359	0.0146206	0.0197089	0.0184851	0.0269226	0.028404	0.0570012
N141188	0.0004851	0.000554401	0.000623701	0.000623701	0.000762301	0.000900901	0.000970201	0.000831601	0.000831601	0.000762301	0.0004851	0.000762301	0.000693001	0.0004851	0.000900901	0.000970201	0.000554401	0.000831601	0.0010395	0.0001386	0.0015246	0.000970201	0.0011088	0.000831601	0.0019404	0.000970201	0.0014553	0.0015939	0.0022176	0.0018711	0.0015246	0.0012474	0.0018018	0.0020097	0.0031185	0.0024255	0.0038808	0.0033957	0.0042273	0.0035343	0.00575191	0.00540541	0.00838531	0.00845461	0.0160776	0.0161469	0.0264726	0.0309078	0.0569647
N141647	0.00161331	0.0022183	0.00289892	0.00231913	0.00302496	0.00267204	0.00320141	0.00279808	0.00282329	0.00204185	0.00368036	0.00244517	0.00312579	0.00257121	0.00378119	0.00307537	0.00398286	0.00277288	0.00431056	0.00362995	0.0047391	0.00365516	0.00458785	0.00332745	0.00426015	0.00390723	0.00534409	0.00466347	0.0060247	0.0053693	0.0072851	0.00594908	0.00806655	0.00642803	0.00869675	0.00778926	0.00988152	0.0102596	0.0127552	0.0118477	0.0149231	0.0132342	0.0188808	0.0168137	0.0228888	0.0233678	0.0326695	0.0334006	0.0601966
N141782	0.000158466	0.000396165	7.9233e-05	0.000396165	0.000316932	0.000316932	0.000396165	7.9233e-05	0.000158466	7.9233e-05	0.000237699	0.000316932	0.000475398	0.000316932	0.000396165	0.000396165	0.000475398	0.000316932	0.000554631	0	0.000871563	0.000554631	0.000316932	0.000475398	0.000633864	0.000633864	0.000554631	0.000633864	0.00110926	0.00079233	0.00103003	0.000950796	0.00190159	0.00198083	0.00126773	0.00182236	0.00245622	0.00316932	0.00499168	0.00419935	0.00610094	0.00594248	0.00919103	0.0107757	0.0171936	0.0175105	0.0344664	0.0415973	0.0785199
N141783	0.000717703	0.00107656	0.00155502	0.000956938	0.00119617	0.00167464	0.000956938	0.00107656	0.00119617	0.00119617	0.00155502	0.000956938	0.00203349	0.00155502	0.00167464	0.00215311	0.00263158	0.00179426	0.00203349	0.00167464	0.00191388	0.00215311	0.00203349	0.00215311	0.00263158	0.00203349	0.00263158	0.00179426	0.00334928	0.00382775	0.00334928	0.00311005	0.00406699	0.0027512	0.00394737	0.0041866	0.00526316	0.00550239	0.00825359	0.00586124	0.0102871	0.0101675	0.0113636	0.0106459	0.0165072	0.0171053	0.0241627	0.0287081	0.0440191
N141899	0	0.000160875	0.000160875	0.00032175	0.00032175	0.00032175	0.00032175	0.000160875	0	0.000482625	0.000482625	0.000160875	0.00032175	0.00032175	0.000804376	0.00032175	0.000160875	0.000482625	0.000482625	0.000482625	0.000643501	0.000643501	0.000804376	0.00032175	0.00032175	0.000804376	0.000965251	0	0.000160875	0.00144788	0.00112613	0.000965251	0.00144788	0.00225225	0.002574	0.002574	0.00289575	0.00273488	0.00353925	0.00241313	0.00563063	0.00675676	0.0101351	0.0104569	0.0131918	0.0178571	0.027027	0.036036	0.0677284
N141935	0.000453515	0.000453515	0.000453515	0.000680272	0.000680272	0.000453515	0.00113379	0.000226757	0.000680272	0.00113379	0.000680272	0.000680272	0.000453515	0.000907029	0.000907029	0.000453515	0.00136054	0.000226757	0.000680272	0.000907029	0.000680272	0.000453515	0.000680272	0.00136054	0.00113379	0.00113379	0.000680272	0.000907029	0.00226757	0.00113379	0.00204082	0.000907029	0.00136054	0.00226757	0.00249433	0.00362812	0.00181406	0.00226757	0.00430839	0.0047619	0.00566893	0.00566893	0.00612245	0.00657596	0.0122449	0.014059	0.0238095	0.024263	0.0653061
N142078	0.000758764	0.00101168	0.000961101	0.00106227	0.00131519	0.00156811	0.00106227	0.00131519	0.00111285	0.00141636	0.00146694	0.000809348	0.00156811	0.00151753	0.00212454	0.00106227	0.00197279	0.00166928	0.0016187	0.00136577	0.00171986	0.00101168	0.00182103	0.00202337	0.00166928	0.00182103	0.00207395	0.00197279	0.0019222	0.00146694	0.00237746	0.00217512	0.00268097	0.00268097	0.0035409	0.00338914	0.00379382	0.00349031	0.00475492	0.00414791	0.00662654	0.00490667	0.00829582	0.00809348	0.0107744	0.0107239	0.0190197	0.021296	0.0370783
N142161	0.0021645	0.00396825	0.00425685	0.00324675	0.00382395	0.0033189	0.0049062	0.0034632	0.0030303	0.0034632	0.00411255	0.0036075	0.0038961	0.00310245	0.00425685	0.002886	0.004329	0.0041847	0.00505051	0.002886	0.00533911	0.0038961	0.00425685	0.00324675	0.00483405	0.00281385	0.00425685	0.00281385	0.00519481	0.00353535	0.0036075	0.0037518	0.0038961	0.0041847	0.00512266	0.0040404	0.00519481	0.00613276	0.00505051	0.00533911	0.00721501	0.00663781	0.00909091	0.00728716	0.0114719	0.0106061	0.0185426	0.0191198	0.0430014
N142380	0.000700133	0.00161031	0.00189036	0.00154029	0.00168032	0.00224043	0.0021004	0.00175033	0.00161031	0.00189036	0.00154029	0.00154029	0.00224043	0.00175033	0.00224043	0.00147028	0.00245047	0.00280053	0.00182035	0.00189036	0.00217041	0.00196037	0.00217041	0.00245047	0.00308059	0.00238045	0.00252048	0.00308059	0.00301057	0.00217041	0.00308059	0.00266051	0.00364069	0.00238045	0.00441084	0.00287055	0.00343065	0.00252048	0.00364069	0.00287055	0.00392074	0.00364069	0.00518098	0.00490093	0.00707134	0.0063012	0.00973185	0.0129525	0.0272352
N142443	0.000472218	0.000865733	0.00110184	0.000550921	0.000550921	0.00125925	0.000708327	0.000865733	0.000708327	0.00141665	0.00118054	0.000708327	0.00133795	0.000944436	0.00157406	0.000865733	0.00149536	0.00102314	0.00133795	0.000944436	0.00125925	0.00125925	0.00110184	0.00133795	0.00157406	0.00110184	0.00141665	0.000865733	0.00196757	0.00141665	0.00314812	0.00157406	0.00306942	0.00236109	0.00283331	0.00165276	0.00401385	0.0026759	0.00401385	0.00432866	0.00621754	0.00385645	0.00645364	0.00739808	0.00991657	0.0114119	0.0173934	0.0162915	0.0323469
N142894	0.000250627	0.000150376	0.000250627	0.000200501	0.000300752	0.000200501	0.000451128	0.000200501	0.000300752	0.000150376	0.000451128	0.000300752	0.000601504	0.000250627	0.000451128	0.000300752	0.000451128	0.000100251	0.000401003	0.000651629	0.00075188	0.000250627	0.000651629	0.000952381	0.000651629	0.000601504	0.00110276	0.00085213	0.00135338	0.00125313	0.00160401	0.00125313	0.00160401	0.00225564	0.00270677	0.00305764	0.00390977	0.00345865	0.00531328	0.0045614	0.00606516	0.00561404	0.00917293	0.00882206	0.0154887	0.0166416	0.0280201	0.0318797	0.0637594
N142909	0.0021978	0.00334665	0.0045954	0.00364635	0.00404595	0.0037962	0.00504496	0.00344655	0.0043956	0.00384615	0.00434565	0.00384615	0.0047952	0.0035964	0.00494505	0.0044955	0.00484515	0.00404595	0.00454545	0.003996	0.00559441	0.00424575	0.004995	0.00464535	0.00474525	0.0044955	0.00654346	0.003996	0.00634366	0.00544456	0.00544456	0.00509491	0.00534466	0.00474525	0.00664336	0.00754246	0.00774226	0.00609391	0.00969031	0.00724276	0.00874126	0.00919081	0.0106394	0.00934066	0.0121379	0.011988	0.0173327	0.0172328	0.0333666
N143048	0.000865468	0.00173094	0.00288489	0.0018271	0.00221175	0.0025964	0.00278873	0.00221175	0.00134628	0.00192326	0.00298106	0.00192326	0.00269257	0.00192326	0.00326955	0.00211559	0.00221175	0.00192326	0.0025964	0.00355803	0.0036542	0.00317338	0.0036542	0.00326955	0.00346187	0.00326955	0.00528897	0.00288489	0.00461583	0.00384652	0.00480815	0.00528897	0.00596211	0.00500048	0.00615444	0.00605827	0.00567362	0.00721223	0.00875084	0.00778921	0.00980864	0.00913549	0.0121165	0.00875084	0.0180787	0.017117	0.0258679	0.0261564	0.04837
N143082	0.0014966	0.00226178	0.00237431	0.00217176	0.00239681	0.00230679	0.00255435	0.00262187	0.00246433	0.00222802	0.00272314	0.00202548	0.00271189	0.00230679	0.0029707	0.0023518	0.00295945	0.00231804	0.00310573	0.00234055	0.00317325	0.00249809	0.00383715	0.00302696	0.00372463	0.00317325	0.00358959	0.00334204	0.00367961	0.00348832	0.00460233	0.00380339	0.00501868	0.00394968	0.0050862	0.00439978	0.00680785	0.00573885	0.00688662	0.00607643	0.00838322	0.0072467	0.0103749	0.00951974	0.0138633	0.0138633	0.0206036	0.024362	0.0499055
N143265	0.000934056	0.00233514	0.00289557	0.00214833	0.00317579	0.00214833	0.00326919	0.00205492	0.00289557	0.00261536	0.00345601	0.00242854	0.00177471	0.00214833	0.00317579	0.00270876	0.00317579	0.00214833	0.00233514	0.00242854	0.00354941	0.00298898	0.00373622	0.00280217	0.0033626	0.00280217	0.00392303	0.00280217	0.00410984	0.00242854	0.00373622	0.00345601	0.00373622	0.00298898	0.0050439	0.00429666	0.0050439	0.00345601	0.00523071	0.0050439	0.00616477	0.00457687	0.00644498	0.00775266	0.0100878	0.00980758	0.0165328	0.0177471	0.0413787
N143319	0.000695008	0.00100687	0.001292	0.00113161	0.00128309	0.00118508	0.00133655	0.001292	0.00110488	0.00108706	0.00108706	0.00124745	0.00128309	0.00114053	0.0013811	0.00107815	0.001292	0.00142566	0.00150585	0.00122963	0.00145239	0.00124745	0.00150585	0.00135437	0.00185335	0.00135437	0.00205829	0.00148803	0.00207611	0.00155931	0.0018088	0.00140784	0.00244144	0.00204047	0.00283349	0.0023256	0.00304734	0.00260182	0.00377799	0.00310971	0.00455319	0.00399184	0.00608577	0.00588083	0.00940933	0.0090351	0.0160921	0.0196919	0.0466546
N143498	0.00220076	0.00336852	0.00456995	0.00358185	0.00395239	0.00445767	0.00427801	0.00426679	0.00388502	0.00357063	0.0043903	0.00344711	0.00478329	0.00405345	0.00510892	0.00389625	0.00503032	0.00377274	0.00468224	0.00437907	0.0051426	0.00412082	0.00528857	0.0043117	0.00562542	0.00474961	0.00547945	0.00492926	0.00604087	0.00519874	0.00606333	0.00571525	0.00774759	0.00595104	0.00816304	0.00625421	0.00935325	0.00705143	0.00997081	0.00852234	0.0118123	0.0101055	0.0138783	0.0136762	0.0187739	0.0181563	0.0291601	0.0314732	0.0619695
N143500	0.000476476	0.00076851	0.00110665	0.000891471	0.00107591	0.000968322	0.00119887	0.00112202	0.000952952	0.000983692	0.00110665	0.00082999	0.00113739	0.00115276	0.00101443	0.00078388	0.00121425	0.00124499	0.00142943	0.00104517	0.00133721	0.0012911	0.00147554	0.000906841	0.00164461	0.00136795	0.00178294	0.00155239	0.00185979	0.00155239	0.00198275	0.0020135	0.00210572	0.00205961	0.0023209	0.00218257	0.0028896	0.00244386	0.00301256	0.003197	0.00405773	0.00454958	0.00640937	0.0060866	0.00854583	0.00923748	0.0157544	0.0178602	0.0415917
N143501	0.00163743	0.00374269	0.00374269	0.00339181	0.00421053	0.00385965	0.00315789	0.00397661	0.00385965	0.00421053	0.0045614	0.00409357	0.00397661	0.00292398	0.00409357	0.00421053	0.00374269	0.00350877	0.00374269	0.00409357	0.00573099	0.00432749	0.00549708	0.00432749	0.00385965	0.00526316	0.00502924	0.00479532	0.00538012	0.00561404	0.00421053	0.00479532	0.0045614	0.00538012	0.00690058	0.00479532	0.00678363	0.00339181	0.00736842	0.0071345	0.00865497	0.00888889	0.0116959	0.00748538	0.014386	0.0104094	0.0173099	0.0164912	0.0247953
N143529	0.000714286	0.001875	0.00125	0.00133929	0.00116071	0.00133929	0.00178571	0.00160714	0.00107143	0.00125	0.00133929	0.00178571	0.00125	0.00107143	0.00169643	0.00142857	0.00169643	0.00160714	0.00205357	0.00125	0.001875	0.000892857	0.00169643	0.001875	0.00267857	0.00196429	0.00223214	0.00178571	0.00258929	0.001875	0.00267857	0.00232143	0.003125	0.00285714	0.00321429	0.003125	0.00339286	0.00401786	0.00571429	0.00464286	0.00473214	0.00678571	0.00857143	0.00625	0.0109821	0.0129464	0.0232143	0.021875	0.0476786
N143530	0.0029872	0.00668563	0.00711238	0.00526316	0.00526316	0.0059744	0.00640114	0.0056899	0.00611664	0.00369844	0.00611664	0.0056899	0.00497866	0.00312945	0.00711238	0.00625889	0.00711238	0.00739687	0.00825036	0.00682788	0.00910384	0.00697013	0.00796586	0.00910384	0.00924609	0.00782361	0.0102418	0.00825036	0.0112376	0.0083926	0.0086771	0.0105263	0.0133713	0.0108108	0.00981508	0.0128023	0.0170697	0.0116643	0.0184922	0.013229	0.0173542	0.0118065	0.0159317	0.0133713	0.0173542	0.014936	0.0170697	0.0162162	0.0227596
N143570	0.00130966	0.00247381	0.00276484	0.00240105	0.00247381	0.00312864	0.00276484	0.00305588	0.00349243	0.00305588	0.00327416	0.00225553	0.00371071	0.00385623	0.00334692	0.00312864	0.00298312	0.0028376	0.00371071	0.00305588	0.00458382	0.00371071	0.0048021	0.00378347	0.00552969	0.00422002	0.006039	0.00371071	0.006039	0.00472934	0.0056752	0.00640279	0.00713038	0.00625728	0.00814901	0.00814901	0.0100407	0.00902212	0.0115687	0.00974971	0.0151339	0.0112049	0.0173894	0.0152066	0.0213184	0.0183353	0.028376	0.0275757	0.0437282
N150004	0.000284495	0	0.000142248	0.000142248	0.000142248	0.000284495	0.000284495	0	0	0	0.000426743	0.000142248	0	0.000142248	0.000142248	0.000142248	0.000142248	0	0	0.000142248	0.000142248	0.000426743	0.000142248	0.000284495	0.000142248	0.000142248	0.000284495	0	0.00056899	0.000142248	0.000426743	0.000284495	0.000426743	0.000853485	0.000711238	0.000284495	0.000426743	0.000711238	0.00170697	0.00142248	0.00113798	0.00170697	0.00341394	0.00341394	0.00668563	0.00697013	0.0140825	0.0174964	0.0470839
N150364	0.000522139	0.000835422	0.00156642	0.000522139	0.00104428	0.00104428	0.00125313	0.00167084	0.000835422	0.00114871	0.00125313	0.00135756	0.00125313	0.00114871	0.00093985	0.000522139	0.00135756	0.00146199	0.00198413	0.00146199	0.00271512	0.00104428	0.00208855	0.00104428	0.00146199	0.00104428	0.00323726	0.00177527	0.00261069	0.00250627	0.00355054	0.00219298	0.00240184	0.00292398	0.00396825	0.00386383	0.0049081	0.00532581	0.00574353	0.00741437	0.00783208	0.00793651	0.0113826	0.0137845	0.0200501	0.0181704	0.0322682	0.0393693	0.0848997
N150398	0.000264504	0.000793511	0.000881679	0.000793511	0.000529007	0.000176336	0.000793511	0.000617175	0.000705343	0.000529007	0.000617175	0.000705343	0.000617175	0.000969847	0.000617175	0.000352671	0.00149885	0.000705343	0.000705343	0.000969847	0.00114618	0.000969847	0.00176336	0.000881679	0.000969847	0.00149885	0.00158702	0.00158702	0.00238053	0.00185153	0.00317404	0.00167519	0.00290954	0.00158702	0.0024687	0.00264504	0.00343855	0.00352671	0.00581908	0.00440839	0.00608358	0.00661259	0.010492	0.0071416	0.012608	0.0137542	0.0205431	0.0267149	0.0536061
N150399	6.44621e-05	0.000193386	0.000386772	0.000128924	0.000193386	0.000451234	0.000451234	0.000451234	0.000515697	0.000515697	0.000193386	0.000257848	0.000515697	0.000451234	0.000644621	0.000128924	0.000386772	0.000257848	0.000709083	0.000257848	0.000451234	0.000902469	0.000902469	0.000515697	0.000773545	0.00032231	0.00103139	0.000773545	0.000580159	0.000838007	0.000709083	0.000966931	0.00109586	0.0013537	0.00148263	0.00109586	0.00161155	0.00154709	0.00174048	0.00270741	0.00315864	0.00302972	0.00348095	0.00464127	0.00670405	0.00547928	0.00889576	0.0130858	0.0264939
N150425	0.00114521	0.0016033	0.00152695	0.00221408	0.00152695	0.00152695	0.00213773	0.00229043	0.00229043	0.00213773	0.00236677	0.00183234	0.00190869	0.00213773	0.00274851	0.00175599	0.00236677	0.00259582	0.00236677	0.00167965	0.00267216	0.00251947	0.00313025	0.00274851	0.00335929	0.00229043	0.00313025	0.00244312	0.00358833	0.00244312	0.00381738	0.00259582	0.00397007	0.00313025	0.00488624	0.00397007	0.00572607	0.00549702	0.00656589	0.00534433	0.00900901	0.00801649	0.00946709	0.00870362	0.0128264	0.0116812	0.0184761	0.0218354	0.0459612
N150576	0.00357846	0.00411523	0.00608338	0.00644122	0.00644122	0.0062623	0.00715692	0.00679907	0.0105565	0.00662015	0.00805153	0.00590446	0.00697799	0.00554661	0.00751476	0.00465199	0.00751476	0.00805153	0.0085883	0.0062623	0.00805153	0.00715692	0.0100197	0.00733584	0.00751476	0.00840938	0.0100197	0.00912507	0.00805153	0.00894614	0.00751476	0.00608338	0.00984076	0.00930399	0.0114511	0.00805153	0.0110932	0.00912507	0.0109143	0.00840938	0.0127035	0.00823045	0.01163	0.0114511	0.0168188	0.0114511	0.0148506	0.0128824	0.0189658
N150627	0.00133067	0.0024356	0.00282768	0.00206729	0.00264946	0.00320787	0.00276827	0.00300589	0.0026257	0.00236432	0.00318411	0.00253065	0.00292273	0.00247125	0.00300589	0.00241184	0.00323163	0.00247125	0.00323163	0.00263758	0.00325539	0.00325539	0.00371875	0.00297025	0.00369499	0.00305342	0.00379004	0.00302965	0.00384944	0.00325539	0.00433656	0.00346925	0.00419399	0.00419399	0.00521576	0.00389697	0.00539397	0.00474052	0.00571476	0.00528704	0.00652267	0.00602367	0.00758008	0.00791275	0.0110374	0.00986123	0.016574	0.018368	0.0503398
N150727	0.00223392	0.00376576	0.00430828	0.00382958	0.00354236	0.00360619	0.00418063	0.0041168	0.00376576	0.00370193	0.00443593	0.00357428	0.00446785	0.00319132	0.00481889	0.00418063	0.00430828	0.00421254	0.00491463	0.00389341	0.00510611	0.00430828	0.00446785	0.00437211	0.00485081	0.00376576	0.00599968	0.00405298	0.00603159	0.00478698	0.00564864	0.00421254	0.00552098	0.00526568	0.00727621	0.00619116	0.00670177	0.0058082	0.00935057	0.00737195	0.00839317	0.00791447	0.010659	0.0104037	0.0142652	0.0135312	0.0222754	0.0237753	0.0534865
N151249	0.00297619	0.00529101	0.00727513	0.00529101	0.00628307	0.00562169	0.00595238	0.00462963	0.00595238	0.00496032	0.00595238	0.00429894	0.00760582	0.00363757	0.00595238	0.00363757	0.00496032	0.00595238	0.00462963	0.00628307	0.0082672	0.00694444	0.00727513	0.00462963	0.00760582	0.0082672	0.00661376	0.00628307	0.0082672	0.00363757	0.00760582	0.00595238	0.0122354	0.0112434	0.0082672	0.00793651	0.010582	0.0102513	0.0102513	0.00694444	0.0102513	0.0109127	0.0178571	0.0142196	0.0175265	0.0135582	0.0234788	0.0188492	0.0274471
N151307	0	0	0.00194363	0.00291545	0.00194363	0.00194363	0.00194363	0	0.00291545	0	0.000971817	0	0.00194363	0.00194363	0.000971817	0	0.00291545	0	0	0	0	0.00194363	0.00194363	0.000971817	0.00291545	0.00194363	0.00194363	0.00194363	0.00194363	0.000971817	0.00194363	0.00194363	0.00194363	0.00194363	0.00291545	0.00291545	0.000971817	0.000971817	0.00388727	0.00194363	0.00194363	0.000971817	0.00291545	0.00194363	0.00291545	0.00194363	0.00388727	0.00680272	0.0126336
N151400	0	0.000252525	0.000505051	0.000126263	0.000505051	0.000252525	0.000252525	0	0	0.000126263	0.000252525	0.000126263	0.000252525	0.000378788	0.0010101	0.000505051	0.000505051	0.000378788	0.000505051	0.000378788	0.000505051	0.000505051	0.000505051	0.000505051	0.00151515	0.000378788	0.000757576	0.000505051	0.000757576	0.000631313	0.0010101	0.000883838	0.00138889	0.00176768	0.00151515	0.00113636	0.00214646	0.00265152	0.00252525	0.0030303	0.00353535	0.0040404	0.00454545	0.00694444	0.00770202	0.00858586	0.0146465	0.022096	0.0606061
N151519	0.000853209	0.00139616	0.00124103	0.0017452	0.00182277	0.00147373	0.00182277	0.00124103	0.00124103	0.00151251	0.00201668	0.00159007	0.00267597	0.00143494	0.00139616	0.00127981	0.00166764	0.00127981	0.00170642	0.00178398	0.00205546	0.00205546	0.00197789	0.00182277	0.00205546	0.00178398	0.0024045	0.00190033	0.0024045	0.00197789	0.00259841	0.00236572	0.00333527	0.00286989	0.00492534	0.00333527	0.0045763	0.00445996	0.00585612	0.00554586	0.00651542	0.00663176	0.00857087	0.00903626	0.0133411	0.0139228	0.0248206	0.0266822	0.0527826
N151520	0.000752276	0.00188069	0.00270819	0.00195592	0.00157978	0.00173023	0.00240728	0.00255774	0.00142932	0.00203114	0.00240728	0.00150455	0.00278342	0.00255774	0.00180546	0.00142932	0.00255774	0.00225683	0.0035357	0.00263296	0.00293387	0.00180546	0.00293387	0.0030091	0.00263296	0.00225683	0.00376138	0.00376138	0.00361092	0.00308433	0.00466411	0.00376138	0.0051907	0.00346047	0.0051907	0.00466411	0.00646957	0.00609343	0.00804935	0.0073723	0.0109832	0.00887685	0.0120364	0.0112089	0.0154217	0.0163244	0.024449	0.0223426	0.0362597
N151565	0.000464396	0.000309598	0.000386997	0.000309598	0.000619195	0.000928793	0.000541796	0.000386997	0.000928793	0.000541796	0.000464396	0.000386997	0.000619195	0.000386997	0.00100619	0.000464396	0.000696594	0.000464396	0.000309598	0.000541796	0.00116099	0.000773994	0.000696594	0.000541796	0.00123839	0.000696594	0.00116099	0.000851393	0.00123839	0.00178019	0.00147059	0.00139319	0.00131579	0.00178019	0.00239938	0.00139319	0.00309598	0.00216718	0.00386997	0.00379257	0.00526316	0.00634675	0.00890093	0.0100619	0.0165635	0.0177245	0.0279412	0.0350619	0.0729102
N151606	0.00183604	0.00354324	0.00357545	0.00357545	0.0034144	0.00338219	0.00367209	0.0039942	0.00380093	0.00354324	0.00386536	0.00315671	0.00418747	0.00373651	0.00470285	0.00392978	0.00566919	0.00421968	0.00473506	0.00383315	0.0051216	0.00386536	0.0051216	0.00460622	0.00560477	0.00525044	0.0071187	0.00486391	0.00686101	0.00566919	0.00760187	0.0059913	0.00869705	0.00718312	0.00840715	0.00779514	0.011435	0.00792398	0.0115316	0.00901917	0.0121759	0.0106619	0.0149138	0.0119826	0.0168143	0.0163956	0.0218715	0.0209051	0.0354324
N151607	0.000543496	0.000319703	0.000383644	0.000351674	0.000735318	0.000607436	0.000351674	0.000287733	0.000479555	0.000287733	0.000671377	0.000447585	0.000639407	0.000607436	0.000831229	0.000639407	0.00099108	0.000799258	0.000703347	0.00092714	0.00143866	0.000735318	0.00153458	0.00134275	0.00147064	0.00124684	0.00188625	0.00179034	0.00246172	0.00246172	0.00297324	0.00249369	0.00418811	0.00342083	0.00469964	0.00444388	0.00652195	0.00601042	0.00939928	0.00860002	0.0122127	0.0124684	0.0180632	0.0181591	0.0259919	0.025896	0.0406023	0.0422008	0.0766009
N151653	0.00103964	0.00129955	0.00129955	0.00155945	0.00259909	0.0014295	0.00233918	0.00233918	0.00181936	0.00259909	0.00350877	0.00259909	0.00272904	0.000909682	0.00181936	0.00220923	0.00311891	0.00155945	0.00194932	0.00233918	0.00181936	0.00272904	0.00389864	0.00324886	0.00298895	0.00246914	0.00376868	0.00272904	0.00233918	0.00311891	0.00480832	0.00194932	0.00376868	0.00233918	0.002859	0.00272904	0.00415854	0.00415854	0.00558804	0.00454841	0.00675763	0.005718	0.00870695	0.00740741	0.011306	0.00896686	0.0165042	0.0188434	0.0292398
N151777	0.000876568	0.00147921	0.0011505	0.000931354	0.00109571	0.00147921	0.000876568	0.00175314	0.00120528	0.00120528	0.00131485	0.00131485	0.00147921	0.00131485	0.00164357	0.00164357	0.00142442	0.00120528	0.00158878	0.00153399	0.00131485	0.00169835	0.00202706	0.00175314	0.00213664	0.00191749	0.00241056	0.00224621	0.00273928	0.00295842	0.00317756	0.00268449	0.00334192	0.00399934	0.00372542	0.00350627	0.00520462	0.00476634	0.00608119	0.00575248	0.00750562	0.00695776	0.0100805	0.00969704	0.0141347	0.0154495	0.0203254	0.0229551	0.0422396
N151847	0.000894614	0.00143138	0.00322061	0.00250492	0.00161031	0.00196815	0.00304169	0.00143138	0.00143138	0.00143138	0.00304169	0.00304169	0.00304169	0.00250492	0.00286277	0.00196815	0.00304169	0.002326	0.00178923	0.00196815	0.00375738	0.00143138	0.00286277	0.00214707	0.002326	0.00339953	0.00268384	0.002326	0.00339953	0.00375738	0.00483092	0.0039363	0.0039363	0.00322061	0.00411523	0.0039363	0.00518876	0.00322061	0.00805153	0.00554661	0.00536769	0.00608338	0.0085883	0.00805153	0.00805153	0.00966184	0.0171766	0.0214707	0.0366792
N151864	0.00125727	0.0022788	0.00322175	0.00235738	0.00306459	0.0026717	0.00251454	0.0026717	0.00298601	0.00306459	0.0041647	0.00282885	0.00220022	0.00212164	0.00212164	0.00385039	0.00353607	0.0026717	0.00385039	0.00322175	0.00385039	0.00243596	0.00408612	0.00235738	0.00432186	0.00275028	0.00369323	0.0026717	0.00463618	0.00392896	0.00605061	0.00369323	0.00471476	0.00510765	0.00581487	0.00479334	0.00581487	0.00589345	0.00754361	0.00667924	0.0083294	0.00746503	0.00990099	0.00950809	0.0144586	0.0102939	0.0167374	0.0166588	0.0322961
N151881	0.00190459	0.00290223	0.00385453	0.00267549	0.00290223	0.00303827	0.00385453	0.00272084	0.00340105	0.00272084	0.00353709	0.00281154	0.00326501	0.00290223	0.00403592	0.00276619	0.0042173	0.0034464	0.00367314	0.00362779	0.0042173	0.00376383	0.00448939	0.00281154	0.00439869	0.00417196	0.00453474	0.00417196	0.00480682	0.00453474	0.00575911	0.00535099	0.00666606	0.00521495	0.00925086	0.00625794	0.00743697	0.00748231	0.0102485	0.00884274	0.0113822	0.011881	0.0151007	0.0139216	0.0190005	0.0181389	0.0301106	0.0306548	0.0525122
N152001	0.00206583	0.00399394	0.00358077	0.00289216	0.00358077	0.00509572	0.00482027	0.0037185	0.00440711	0.00399394	0.00592205	0.00261672	0.00468255	0.00316761	0.00523344	0.00440711	0.00440711	0.00275444	0.00358077	0.00330533	0.00605977	0.00454483	0.00344305	0.00468255	0.00495799	0.00454483	0.00413166	0.0037185	0.00482027	0.00454483	0.00674838	0.00509572	0.00440711	0.00468255	0.00633522	0.00578433	0.00716155	0.00509572	0.00647294	0.00785016	0.00798788	0.00716155	0.00826332	0.00922738	0.0115687	0.00895193	0.014874	0.0187302	0.030712
N152235	0	0.000340909	0.000340909	0.000454545	0.000340909	0.000227273	0.000681818	0.000454545	0.000568182	0.000227273	0.000795455	0.000340909	0.000568182	0.000795455	0.000227273	0.000454545	0.000568182	0.000340909	0.000340909	0.000340909	0.000340909	0.000454545	0.000454545	0.000340909	0.000568182	0.000795455	0.000909091	0.000454545	0.00113636	0.00102273	0.00113636	0.000454545	0.000909091	0.000568182	0.00125	0.00170455	0.000909091	0.00204545	0.00340909	0.00284091	0.00261364	0.00488636	0.00670455	0.00534091	0.0114773	0.0121591	0.0186364	0.0223864	0.0526136
N152637	0.00125156	0.00160915	0.00238393	0.00143036	0.00166875	0.00202634	0.00232433	0.000953573	0.00143036	0.00178795	0.00214554	0.00166875	0.00184755	0.00166875	0.00214554	0.00148996	0.00226474	0.00148996	0.00256273	0.00172835	0.00244353	0.00232433	0.00256273	0.00262233	0.00327791	0.00268192	0.00321831	0.00226474	0.00387389	0.0033971	0.00387389	0.00297992	0.00458907	0.0035759	0.00524465	0.00476786	0.00601943	0.00488706	0.00804577	0.00756899	0.00905894	0.00888015	0.0116217	0.0116217	0.0141844	0.0138864	0.0209786	0.0214554	0.0356398
N152679	0.000750751	0.0018018	0.00225225	0.00165165	0.000600601	0.00165165	0.00105105	0.0012012	0.00135135	0.00255255	0.0021021	0.0021021	0.00255255	0.00225225	0.0033033	0.00225225	0.00165165	0.000600601	0.0027027	0.00195195	0.00195195	0.0021021	0.00225225	0.00195195	0.00195195	0.0021021	0.00255255	0.00255255	0.0024024	0.0033033	0.00255255	0.0033033	0.0033033	0.00345345	0.00345345	0.0045045	0.0036036	0.00585586	0.00660661	0.00525526	0.00750751	0.00840841	0.00630631	0.00990991	0.0117117	0.0127628	0.0207207	0.0202703	0.0468468
N152730	0.000703235	0.000703235	0.00117206	0.000625098	0.00132833	0.00101578	0.0012502	0.00148461	0.00101578	0.000859509	0.00117206	0.000937647	0.00101578	0.00101578	0.000703235	0.00101578	0.00148461	0.000703235	0.000937647	0.00132833	0.00117206	0.00156274	0.00148461	0.00117206	0.00179716	0.00164088	0.00164088	0.00156274	0.00148461	0.00148461	0.00187529	0.00164088	0.00234412	0.00242225	0.00296921	0.00195343	0.00304735	0.00289108	0.00453196	0.00390686	0.00500078	0.00484451	0.00898578	0.00820441	0.0138303	0.0130489	0.0254727	0.0286764	0.0668855
N152845	0.00116663	0.00262493	0.00262493	0.00204161	0.00291659	0.00223605	0.00359712	0.00272215	0.00262493	0.00213883	0.00359712	0.00194439	0.00301381	0.00272215	0.0034999	0.00233327	0.00311102	0.00291659	0.00262493	0.00174995	0.00427766	0.00330546	0.00281937	0.00233327	0.00359712	0.00311102	0.00369434	0.00272215	0.00408322	0.00272215	0.0049582	0.00311102	0.00408322	0.00311102	0.00476376	0.00534707	0.00563873	0.00486098	0.00554151	0.00573595	0.00719424	0.00651371	0.00874976	0.00806922	0.0148746	0.0122497	0.0185689	0.0226521	0.0391795
N152949	0.00146872	0.00288766	0.00276319	0.00268851	0.00258893	0.00331085	0.00293744	0.00291255	0.00298723	0.00293744	0.0030868	0.00288766	0.00323617	0.00278808	0.00338553	0.00288766	0.00323617	0.00273829	0.00341042	0.00298723	0.00378382	0.00291255	0.00405765	0.00318638	0.0042817	0.00316148	0.00363446	0.00365936	0.00492893	0.00403276	0.00492893	0.0038585	0.00517786	0.00420702	0.00577531	0.00515297	0.00704488	0.00599935	0.00769212	0.00714446	0.00916084	0.00799084	0.0116502	0.0107291	0.0153344	0.0163053	0.0254661	0.0299221	0.0575291
N153006	0.00198911	0.00492044	0.00366415	0.00376884	0.00376884	0.00450168	0.00492044	0.00481575	0.00387353	0.00408291	0.00670017	0.00376884	0.0053392	0.00481575	0.00471106	0.00397822	0.00554858	0.00523451	0.00512982	0.00607203	0.00502513	0.00512982	0.00617672	0.00408291	0.00680486	0.00544389	0.0063861	0.00670017	0.00670017	0.00586265	0.0063861	0.00565327	0.00900335	0.00764238	0.00889866	0.00764238	0.00984087	0.00931742	0.0095268	0.00816583	0.0106784	0.00879397	0.0110972	0.00994556	0.0151801	0.0105737	0.0155988	0.0110972	0.0184255
N153026	0.00194363	0.00291545	0.00226757	0.00259151	0.00356333	0.00194363	0.00388727	0.00518303	0.0016197	0.00194363	0.0058309	0.00194363	0.00356333	0.00291545	0.00291545	0.00259151	0.00356333	0.00291545	0.00453515	0.00485909	0.00388727	0.00129576	0.00323939	0.00453515	0.00485909	0.00226757	0.00453515	0.0016197	0.00615484	0.00550696	0.00421121	0.00323939	0.0058309	0.00421121	0.00518303	0.0058309	0.00712666	0.00291545	0.00680272	0.00712666	0.00809848	0.00777454	0.0103661	0.00485909	0.0123097	0.0126336	0.0139294	0.0142533	0.0252672
N153244	0.00010725	0.000536251	0.000858001	0.00032175	0.00032175	0.000429	0.000643501	0.000858001	0.00032175	0.000858001	0.000858001	0.000536251	0.000858001	0.000536251	0.000536251	0.000643501	0.000750751	0.00117975	0.00117975	0.000750751	0.000965251	0.000750751	0.00117975	0.001716	0.001287	0.000858001	0.00160875	0.00160875	0.000750751	0.00182325	0.001716	0.00203775	0.00289575	0.0019305	0.003003	0.00289575	0.00396825	0.0036465	0.004719	0.00396825	0.00622051	0.00697126	0.00793651	0.0104033	0.0172673	0.0160875	0.0246675	0.030459	0.0589876
N153335	0.00218729	0.00341763	0.00328093	0.00287081	0.00341763	0.00369105	0.00519481	0.00300752	0.00287081	0.00273411	0.00300752	0.00232399	0.0050581	0.00273411	0.00314422	0.00300752	0.00410116	0.00232399	0.00423787	0.00191388	0.00464798	0.00328093	0.00451128	0.00410116	0.00451128	0.00355434	0.00546822	0.00341763	0.00519481	0.00355434	0.00478469	0.00560492	0.00738209	0.00601504	0.00779221	0.00628845	0.00710868	0.00533151	0.00847573	0.00724539	0.0101162	0.00820232	0.0107997	0.00806562	0.0128503	0.0140807	0.0173616	0.0133971	0.0239234
N153384	0.00217185	0.00393647	0.00515814	0.00325777	0.00380073	0.00380073	0.00488666	0.00461518	0.00393647	0.00312203	0.00407221	0.00529388	0.00407221	0.00475092	0.00366499	0.00542962	0.00434369	0.00475092	0.00556536	0.00515814	0.0050224	0.00542962	0.00583684	0.00244333	0.00352925	0.00475092	0.00447944	0.00434369	0.00529388	0.00529388	0.00583684	0.00434369	0.00447944	0.00461518	0.00665128	0.00610832	0.00610832	0.00556536	0.00542962	0.0070585	0.00828017	0.00841591	0.00977331	0.00855165	0.00990905	0.00909461	0.0158816	0.0157459	0.0305416
N153439	0.00180832	0.00361664	0.00321479	0.00140647	0.00361664	0.00281294	0.00442033	0.00421941	0.00341571	0.00261202	0.00361664	0.00281294	0.00281294	0.00200924	0.00361664	0.00180832	0.00281294	0.00261202	0.00281294	0.00221017	0.00361664	0.00321479	0.00381756	0.00301386	0.00421941	0.00200924	0.00482218	0.00442033	0.0066305	0.00602773	0.00602773	0.00401849	0.00602773	0.0058268	0.00984529	0.00683142	0.00723327	0.0066305	0.0116536	0.0104481	0.0128592	0.0136628	0.0162749	0.0168776	0.02391	0.0251155	0.0341571	0.0379747	0.0528431
N153475	0.00112214	0.00276219	0.00267587	0.0023306	0.00276219	0.00345274	0.00284851	0.0037117	0.00293483	0.00258956	0.00336642	0.00215796	0.00302115	0.00310747	0.00302115	0.00310747	0.0037117	0.0023306	0.0037117	0.00284851	0.0037117	0.0046612	0.00379801	0.00250324	0.00440224	0.00431593	0.00517911	0.00293483	0.00492016	0.00500647	0.00664653	0.00664653	0.00483384	0.00397065	0.00776867	0.00707812	0.00811394	0.00802762	0.00914976	0.00863185	0.0112214	0.0125162	0.0142426	0.0142426	0.0204575	0.0183858	0.0296936	0.0305568	0.0566249
N153476	0.00125362	0.00235054	0.0025856	0.00250725	0.00211549	0.002899	0.0027423	0.00227219	0.00219384	0.00266395	0.00329076	0.0024289	0.00235054	0.0027423	0.0025856	0.00235054	0.00329076	0.00180208	0.00344747	0.00235054	0.00297736	0.002899	0.002899	0.0025856	0.00352582	0.00211549	0.00368252	0.00438768	0.00391757	0.00336911	0.00438768	0.00336911	0.00407428	0.0054846	0.00571966	0.00462274	0.00783515	0.00673823	0.0077568	0.00626812	0.00924548	0.0101857	0.0118311	0.0115177	0.0153569	0.014495	0.0241323	0.0256993	0.0499882
N153617	0.000839793	0.00103359	0.00116279	0.000904393	0.00155039	0.00148579	0.00155039	0.00155039	0.00142119	0.000839793	0.00167959	0.00148579	0.00122739	0.00129199	0.00142119	0.00155039	0.00193798	0.00116279	0.00174419	0.000839793	0.00200258	0.00167959	0.00142119	0.00174419	0.00174419	0.00142119	0.00239018	0.00206718	0.00206718	0.00193798	0.00290698	0.00245478	0.00394057	0.00187339	0.00400517	0.00303618	0.00342377	0.00277778	0.00536176	0.00458656	0.00723514	0.00626615	0.00891473	0.00710594	0.0142765	0.0141473	0.0247416	0.02823	0.0563307
N153654	0.00114457	0.00307604	0.00350526	0.00236068	0.00300451	0.00300451	0.00307604	0.00257529	0.00228915	0.00293297	0.00414908	0.00264683	0.00314758	0.00271836	0.00250376	0.00193147	0.00393447	0.00264683	0.00407754	0.00271836	0.00371987	0.00307604	0.00329065	0.00364833	0.00436369	0.00407754	0.00472137	0.00321911	0.00486444	0.00393447	0.00515058	0.00472137	0.00579441	0.00429215	0.0073682	0.00679591	0.00822663	0.00650976	0.00915659	0.00808355	0.0105873	0.0116603	0.015881	0.0126618	0.0208885	0.0203162	0.0281136	0.0316189	0.0583017
N153673	0.000640923	0.00152219	0.002083	0.00288415	0.00176254	0.00192277	0.00288415	0.00192277	0.00256369	0.00192277	0.00248358	0.00160231	0.00152219	0.00144208	0.002083	0.002083	0.00200288	0.00240346	0.00240346	0.00224323	0.00256369	0.00232335	0.00256369	0.00240346	0.00304438	0.00248358	0.00376542	0.00320461	0.00288415	0.00248358	0.0031245	0.00296427	0.00400577	0.00328473	0.00488704	0.00504727	0.00560808	0.00424611	0.00680981	0.00592854	0.00801154	0.00745073	0.0104951	0.00921327	0.0136196	0.0125781	0.0181061	0.020109	0.0453453
N153675	0.000393546	0.00131182	0.000918274	0.00065591	0.00065591	0.000524728	0.00157418	0.000524728	0.000262364	0.000262364	0.00065591	0.000787092	0.00104946	0.000918274	0.00065591	0.000131182	0.00104946	0.000524728	0.00065591	0.000524728	0.001443	0.000918274	0.00118064	0.000524728	0.00065591	0.000524728	0.000787092	0.00104946	0.00118064	0.00157418	0.00196773	0.000918274	0.00183655	0.00262364	0.004329	0.00183655	0.00327955	0.00196773	0.00419782	0.00524728	0.00446019	0.00498491	0.00616555	0.00760855	0.0116752	0.0139053	0.0225633	0.027417	0.0549652
N153700	0.000991706	0.00126217	0.00216372	0.00117202	0.00207357	0.0018031	0.00171295	0.00207357	0.00117202	0.00216372	0.00171295	0.0018031	0.00243419	0.00144248	0.00144248	0.00198341	0.00252434	0.00171295	0.00342589	0.00171295	0.00270465	0.00198341	0.00297512	0.00216372	0.00288496	0.00342589	0.00270465	0.00333574	0.0036062	0.00369636	0.00423729	0.00351605	0.00468806	0.00423729	0.00549946	0.00477822	0.00766318	0.00604039	0.00649116	0.00685179	0.0102777	0.0080238	0.0109989	0.0115398	0.0172196	0.0164082	0.0280382	0.0275875	0.0544537
N153773	0.00471698	0.0081761	0.0116352	0.00691824	0.0103774	0.0081761	0.0110063	0.0081761	0.0072327	0.00597484	0.00786164	0.00597484	0.00691824	0.00597484	0.0100629	0.0091195	0.00880503	0.0081761	0.00691824	0.00566038	0.0103774	0.00660377	0.00660377	0.0116352	0.00534591	0.00660377	0.0072327	0.00628931	0.00974843	0.00974843	0.00943396	0.00974843	0.0122642	0.0128931	0.0113208	0.0110063	0.0119497	0.00880503	0.013522	0.0100629	0.0176101	0.0141509	0.0150943	0.0160377	0.018239	0.0216981	0.0226415	0.0245283	0.0415094
N153842	0.00133918	0.00158266	0.00206964	0.00231312	0.00121743	0.00255661	0.00133918	0.00194789	0.00292184	0.00121743	0.00231312	0.00243487	0.00267835	0.00133918	0.00255661	0.00219138	0.0036523	0.00206964	0.00267835	0.00243487	0.00182615	0.00304358	0.00243487	0.00231312	0.00316533	0.00219138	0.0036523	0.0028001	0.00511322	0.00316533	0.00535671	0.0028001	0.00426102	0.00438276	0.00535671	0.00401753	0.00486973	0.00523496	0.00791332	0.00486973	0.00949598	0.00742635	0.00827855	0.0112004	0.0138787	0.0144875	0.0217921	0.0253226	0.0485756
N153899	0.00185659	0.00296051	0.00306087	0.00296051	0.00391389	0.00331176	0.00341211	0.00291033	0.00331176	0.00381354	0.0043655	0.00316122	0.00386372	0.00326158	0.00336193	0.00346229	0.00376336	0.00270962	0.00356265	0.00346229	0.00506799	0.00291033	0.00466657	0.00381354	0.00476692	0.00406443	0.00461639	0.00441568	0.00446585	0.00411461	0.00561995	0.00466657	0.00541924	0.00461639	0.00582066	0.00501781	0.00622209	0.00516835	0.00647298	0.00592102	0.00762708	0.0059712	0.00883135	0.00747654	0.0111395	0.00938331	0.0141001	0.0153043	0.0283506
N153976	0.00212395	0.00379276	0.00386862	0.00273079	0.00394447	0.00348934	0.00394447	0.00333763	0.00379276	0.00386862	0.00402033	0.00394447	0.00402033	0.00273079	0.00485474	0.00242737	0.00333763	0.0028825	0.00447546	0.00333763	0.00561329	0.00402033	0.005765	0.00455132	0.00500645	0.00432375	0.00599257	0.00515816	0.00538572	0.00523401	0.00637184	0.00470303	0.00591671	0.00675112	0.0071304	0.00697868	0.00788895	0.00766138	0.0114541	0.00819237	0.0110749	0.0093302	0.0135022	0.0122886	0.0157779	0.0143366	0.0201775	0.022529	0.0339073
N154076	0.000956938	0.00322967	0.00370813	0.00239234	0.00287081	0.0034689	0.00287081	0.00263158	0.00299043	0.0034689	0.00322967	0.00239234	0.00394737	0.00370813	0.00370813	0.00322967	0.00394737	0.00358852	0.00442584	0.00299043	0.00442584	0.00466507	0.0041866	0.00334928	0.00454545	0.00394737	0.00610048	0.00466507	0.00610048	0.00514354	0.0076555	0.0062201	0.00741627	0.00729665	0.00885167	0.00777512	0.00944976	0.00825359	0.0120813	0.00909091	0.015311	0.0156699	0.0192584	0.0196172	0.0245215	0.0217703	0.0361244	0.0303828	0.0422249
N160069	0.00155844	0.0025974	0.0025974	0.00220779	0.00142857	0.00285714	0.00298701	0.00285714	0.00168831	0.00324675	0.00220779	0.00220779	0.00402597	0.00220779	0.00415584	0.00285714	0.00246753	0.00337662	0.00233766	0.00246753	0.00311688	0.00285714	0.00428571	0.00337662	0.00519481	0.00272727	0.00428571	0.00350649	0.00454545	0.00311688	0.00363636	0.00454545	0.00363636	0.00415584	0.00467532	0.00519481	0.00545455	0.00623377	0.0061039	0.0038961	0.00948052	0.00649351	0.00805195	0.00987013	0.0122078	0.0105195	0.0142857	0.011039	0.0219481
N160138	0.000803697	0.00130601	0.00190878	0.00231063	0.00281294	0.00190878	0.00170786	0.00130601	0.00120555	0.00180832	0.00170786	0.00110508	0.00221017	0.00150693	0.00150693	0.00190878	0.00261202	0.00221017	0.00231063	0.00190878	0.00311433	0.00271248	0.00221017	0.00251155	0.00311433	0.0029134	0.00361664	0.00221017	0.00381756	0.00341571	0.00502311	0.00442033	0.00512357	0.00341571	0.00683142	0.0045208	0.00562588	0.00612819	0.00642958	0.00592727	0.00904159	0.00753466	0.0103476	0.00984529	0.0142656	0.015873	0.0231063	0.0224031	0.0370705
N160205	0.00157904	0.0025052	0.00296069	0.00256593	0.0025963	0.00285441	0.00288478	0.00279368	0.00289996	0.00282404	0.00299106	0.00258112	0.00311252	0.00229264	0.00285441	0.00267221	0.00306697	0.00309734	0.00367429	0.00264185	0.003401	0.00282404	0.00394759	0.00289996	0.00346173	0.00305179	0.00428161	0.00387167	0.00443345	0.00361356	0.00511668	0.00435753	0.00481302	0.0049193	0.00516223	0.00479784	0.00649834	0.00551144	0.0067109	0.00613394	0.00809256	0.00766743	0.00918573	0.00821402	0.011448	0.0106737	0.0152893	0.0151223	0.0270562
N160216	0.000764386	0.000856112	0.00116187	0.000917263	0.00134532	0.000764386	0.00143705	0.00131474	0.00131474	0.00113129	0.00119244	0.000886687	0.00113129	0.00103956	0.00165107	0.00119244	0.00180395	0.00143705	0.00183453	0.00155935	0.00201798	0.00155935	0.00207913	0.00155935	0.00259891	0.00180395	0.00217086	0.00192625	0.00247661	0.00223201	0.00296582	0.00247661	0.00412768	0.00308812	0.00357733	0.00400538	0.005473	0.00476977	0.0072158	0.00587048	0.00785789	0.0072158	0.0116187	0.0105179	0.0162356	0.01541	0.0244603	0.0242769	0.0447013
N160302	0.00243228	0.00353787	0.00574903	0.00298507	0.00442233	0.00386954	0.00541736	0.00409066	0.00442233	0.00364842	0.00563847	0.00320619	0.00519624	0.00442233	0.00497512	0.00364842	0.00674406	0.00475401	0.00574903	0.00486457	0.00475401	0.0039801	0.00685462	0.00541736	0.00630182	0.00674406	0.00740741	0.00707573	0.00519624	0.0079602	0.00983969	0.00619127	0.00873411	0.00751797	0.00895522	0.00851299	0.0102819	0.00862355	0.0114981	0.00818132	0.0135987	0.013267	0.0131564	0.0119403	0.0181316	0.0172471	0.0241017	0.0200111	0.0365948
N160311	0.000773036	0.000463822	0.00123686	0.00139147	0.0021645	0.00185529	0.0021645	0.00170068	0.00185529	0.00200989	0.00231911	0.00139147	0.00170068	0.00200989	0.00154607	0.00170068	0.00247372	0.00108225	0.00200989	0.00185529	0.00200989	0.00231911	0.00371058	0.00200989	0.00340136	0.00139147	0.00293754	0.00200989	0.00371058	0.00231911	0.004329	0.00262832	0.00510204	0.00340136	0.00463822	0.00371058	0.00479283	0.00448361	0.00726654	0.0063389	0.00664811	0.00695733	0.00989487	0.00912183	0.0140693	0.0151515	0.0247372	0.0279839	0.0431354
N160445	0.00373134	0.00515281	0.00764037	0.00764037	0.00639659	0.00817342	0.00675195	0.00461976	0.00604122	0.00639659	0.00764037	0.00675195	0.00604122	0.00515281	0.00604122	0.00533049	0.00764037	0.00621891	0.007285	0.00657427	0.0083511	0.00657427	0.00799574	0.00746269	0.00764037	0.00568586	0.00710732	0.00817342	0.00995025	0.00621891	0.0113717	0.007285	0.00995025	0.00692964	0.00923952	0.0104833	0.00746269	0.00781805	0.0119048	0.00710732	0.00852878	0.0131485	0.0133262	0.0101279	0.0142146	0.00977257	0.0190121	0.0165245	0.0241649
N160607	0.00157736	0.00242579	0.00348932	0.00326227	0.00283208	0.00333397	0.00325032	0.00303523	0.00292768	0.00289183	0.00344152	0.00297548	0.00363271	0.00304718	0.00383586	0.00321447	0.00365661	0.00360881	0.00366856	0.00329812	0.00396731	0.00363271	0.00474404	0.00363271	0.00454089	0.00391951	0.00537737	0.00431385	0.00555662	0.00482769	0.0061541	0.00540127	0.00671574	0.00589121	0.00744467	0.00560442	0.00889059	0.00736102	0.00958367	0.00808996	0.0111252	0.0102648	0.0145309	0.0127623	0.0186177	0.0172793	0.0262774	0.026612	0.0506309
N160873	0.00188909	0.00371725	0.00481414	0.00341255	0.00444851	0.00365631	0.00499695	0.00365631	0.00383912	0.00383912	0.0047532	0.003961	0.00645948	0.00432663	0.00603291	0.00335161	0.00572821	0.00536258	0.0055454	0.00420475	0.00645948	0.00481414	0.00627666	0.0063376	0.00566728	0.00572821	0.0071298	0.00658135	0.00652041	0.00816575	0.0095064	0.00694698	0.00865326	0.00840951	0.00981109	0.0101158	0.0122486	0.0095064	0.0127361	0.011883	0.0160878	0.0129799	0.0161487	0.0141987	0.0196222	0.0157831	0.0230957	0.0223035	0.0330896
N160987	0.00287081	0.0041866	0.00598086	0.00466507	0.00562201	0.00562201	0.00562201	0.00299043	0.00550239	0.0041866	0.00490431	0.00478469	0.00669856	0.0041866	0.00514354	0.00526316	0.00610048	0.00490431	0.00514354	0.00478469	0.00657895	0.00598086	0.00729665	0.00502392	0.00789474	0.00645933	0.00813397	0.00777512	0.00933014	0.00837321	0.00897129	0.00885167	0.00992823	0.00897129	0.0101675	0.00956938	0.0139952	0.011244	0.0154306	0.012201	0.0169856	0.0148325	0.02189	0.0188995	0.027512	0.0246411	0.0332536	0.0344498	0.0494019
N161393	0.000466853	0.00108932	0.00248988	0.00140056	0.00280112	0.00311236	0.00186741	0.0026455	0.00311236	0.0026455	0.00202303	0.00140056	0.00202303	0.00202303	0.00342359	0.0017118	0.00404606	0.00233427	0.00342359	0.00295674	0.00295674	0.00311236	0.00342359	0.00404606	0.00529101	0.00295674	0.00451292	0.00389045	0.00638033	0.00497977	0.00544662	0.00622471	0.00575786	0.00778089	0.00793651	0.00731404	0.00762527	0.0087146	0.0096483	0.00980392	0.0115157	0.0116713	0.0144725	0.00902583	0.0168067	0.0189854	0.022409	0.0262994	0.0375039
N161784	0.00142248	0.00327169	0.00312945	0.00341394	0.0029872	0.00256046	0.00355619	0.00312945	0.00284495	0.00398293	0.00512091	0.00341394	0.00312945	0.00312945	0.00412518	0.0029872	0.00469417	0.00384068	0.00497866	0.0029872	0.00398293	0.00398293	0.00483642	0.00554765	0.00512091	0.00398293	0.00554765	0.00384068	0.00398293	0.00398293	0.00810811	0.0059744	0.00782361	0.00611664	0.00625889	0.00654339	0.0105263	0.0059744	0.0109531	0.00853485	0.01266	0.0105263	0.0130868	0.0135135	0.0157895	0.0152205	0.0147937	0.0152205	0.0277383
N161789	0.00102041	0.00147392	0.00124717	0.000793651	0.00170068	0.000907029	0.00102041	0.00181406	0.00147392	0.00113379	0.00147392	0.00136054	0.00113379	0.00113379	0.00147392	0.00181406	0.00204082	0.00192744	0.00260771	0.00181406	0.00170068	0.00204082	0.00192744	0.00204082	0.00260771	0.00136054	0.00328798	0.00260771	0.00306122	0.00226757	0.00260771	0.00340136	0.00362812	0.00328798	0.0053288	0.00521542	0.00680272	0.00657596	0.00804989	0.00725624	0.00952381	0.00804989	0.0124717	0.0109977	0.0183673	0.0178005	0.0316327	0.0363946	0.0611111
N161799	0.00123817	0.00221102	0.00185726	0.00221102	0.0019457	0.0019457	0.00256478	0.00212258	0.00221102	0.00176882	0.00274166	0.00221102	0.00265322	0.00150349	0.00318387	0.00168037	0.00300699	0.00203414	0.00247634	0.00300699	0.00336075	0.00283011	0.00300699	0.00327231	0.00406828	0.00265322	0.00318387	0.00336075	0.00451048	0.00327231	0.00504112	0.00291855	0.00442204	0.00459892	0.00557177	0.00610241	0.00769435	0.00654462	0.0086672	0.00813655	0.0125586	0.0114089	0.0131777	0.0144158	0.0220218	0.0222871	0.0331653	0.0336959	0.0642965
N161814	0.00124224	0.00289855	0.00207039	0.00310559	0.00248447	0.00393375	0.00310559	0.00351967	0.00165631	0.00289855	0.00414079	0.00331263	0.00310559	0.00351967	0.00414079	0.00227743	0.00372671	0.00227743	0.00331263	0.00248447	0.0057971	0.00248447	0.00186335	0.00351967	0.00434783	0.00393375	0.00393375	0.0047619	0.00496894	0.00538302	0.00434783	0.00455487	0.0057971	0.0047619	0.00351967	0.00517598	0.00600414	0.0047619	0.00724638	0.0057971	0.00724638	0.00848861	0.0109731	0.010352	0.0173913	0.0180124	0.0233954	0.0242236	0.0364389
N161842	0.000332116	0.000464962	0.000664231	0.000996347	0.000597808	0.000730654	0.000929924	0.000531385	0.000797077	0.000664231	0.000730654	0.000398539	0.000664231	0.000730654	0.000664231	0.00106277	0.000996347	0.00106277	0.000730654	0.000996347	0.00146131	0.00126204	0.00112919	0.00132846	0.00146131	0.000797077	0.00159415	0.00212554	0.00159415	0.00146131	0.00245766	0.00179342	0.00185985	0.00212554	0.00332116	0.00325473	0.00252408	0.00285619	0.00398539	0.00418466	0.00617735	0.00551312	0.0089007	0.00896712	0.0147459	0.0144802	0.0253736	0.031086	0.0642312
N161875	0.000329381	0.000329381	0.00247036	0.000329381	0	0	0.00016469	0.000329381	0.000823452	0.000823452	0.000329381	0.000823452	0.000823452	0.000494071	0.00115283	0.000988142	0.00115283	0.000658762	0.000988142	0.000823452	0.00131752	0.00131752	0.0016469	0.00131752	0.00148221	0.00214097	0.000658762	0.00115283	0.00197628	0.00131752	0.00197628	0.00263505	0.00296443	0.00296443	0.00312912	0.00477602	0.00362319	0.00395257	0.00428195	0.00625823	0.00658762	0.00658762	0.00889328	0.0100461	0.0153162	0.0148221	0.0256917	0.029809	0.0591238
N161877	0.00145502	0.00242504	0.00304685	0.00283543	0.00295979	0.00274838	0.00295979	0.00257427	0.002823	0.00279812	0.00317121	0.00277325	0.00315877	0.00276082	0.00361891	0.00273594	0.00383032	0.00263646	0.00339506	0.00343237	0.00401686	0.00325826	0.0041661	0.0035816	0.00457649	0.00384276	0.00477547	0.00378058	0.00480034	0.00422828	0.00560869	0.00448944	0.00586984	0.0056833	0.00696422	0.00618075	0.0071632	0.00651652	0.0091281	0.00726269	0.0103593	0.00900374	0.011864	0.0106577	0.0150601	0.0138787	0.0196864	0.0200346	0.033764
N161879	0.00313972	0.0048404	0.00588697	0.0030089	0.003663	0.00549451	0.00353218	0.00523286	0.00562533	0.00392465	0.0048404	0.00431711	0.00510204	0.00497122	0.00588697	0.0030089	0.00523286	0.0030089	0.00470958	0.00431711	0.0048404	0.00588697	0.00575615	0.00418629	0.00706436	0.00392465	0.00680272	0.0048404	0.00837258	0.00470958	0.0066719	0.00601779	0.00758765	0.00562533	0.00654108	0.00562533	0.0096808	0.00601779	0.0104657	0.00654108	0.00889587	0.00994244	0.00915751	0.00876504	0.0130822	0.00981162	0.0136054	0.0117739	0.0197541
N161896	0.00627716	0.0104297	0.0112023	0.00791888	0.0100435	0.00917431	0.0154515	0.0105263	0.0088846	0.00869145	0.0095606	0.0088846	0.00994689	0.00917431	0.0111057	0.00820859	0.0107195	0.00791888	0.0129406	0.0088846	0.011492	0.00965717	0.0103332	0.00878803	0.00869145	0.00985031	0.00985031	0.0095606	0.00975374	0.00898117	0.0102366	0.0088846	0.0111057	0.00965717	0.0107195	0.01014	0.0110092	0.0100435	0.0113955	0.0118783	0.0105263	0.00936746	0.0136166	0.0103332	0.0137132	0.0116852	0.0174795	0.0161275	0.0289715
N161897	0.00137368	0.00207109	0.00236696	0.00202883	0.00215563	0.0022613	0.00259943	0.00249377	0.0021979	0.00200769	0.00255717	0.00221903	0.00249377	0.00253603	0.0027051	0.00262057	0.00262057	0.0027051	0.00306437	0.00234583	0.00255717	0.0026417	0.00380405	0.00291644	0.00374065	0.00350818	0.00435352	0.00346591	0.00445919	0.00390972	0.00492413	0.00475506	0.00610761	0.00532567	0.00579061	0.00570607	0.00790397	0.00627668	0.00898178	0.00872818	0.0112431	0.0108627	0.0152585	0.0152796	0.0218944	0.0224228	0.0358426	0.0389281	0.06786
N161934	0.00196993	0.00380852	0.004498	0.00371003	0.00338171	0.00407118	0.00433384	0.00423534	0.00380852	0.00311905	0.00485915	0.0034802	0.0035787	0.00371003	0.00456366	0.00390702	0.00472782	0.00397268	0.00453083	0.00371003	0.00495765	0.00466216	0.00485915	0.004498	0.00545013	0.00416968	0.00538446	0.00479349	0.00564712	0.00551579	0.0061396	0.0054173	0.0070589	0.00633659	0.00771554	0.00633659	0.00817519	0.00761705	0.0096198	0.00929148	0.012312	0.0103749	0.0131985	0.0133955	0.0164489	0.0154967	0.0207827	0.0200932	0.0362466
N161963	0.00188218	0.00282326	0.00282326	0.00263505	0.0031997	0.00376435	0.00451722	0.00395257	0.0031997	0.00263505	0.00414079	0.00376435	0.004329	0.00338792	0.00414079	0.00338792	0.00508187	0.00357613	0.00489366	0.00395257	0.00357613	0.00301148	0.00301148	0.00376435	0.00338792	0.00451722	0.00470544	0.004329	0.00658762	0.00508187	0.00602296	0.00357613	0.00376435	0.00677583	0.00545831	0.00470544	0.00658762	0.00527009	0.00978731	0.00903444	0.00828157	0.00790514	0.0124224	0.0095991	0.0105402	0.0127988	0.0176925	0.0161867	0.0225861
N161980	0.00060024	0.0010004	0.00090036	0.00130052	0.00120048	0.00110044	0.00080032	0.00090036	0.0010004	0.00110044	0.0010004	0.00120048	0.00110044	0.00110044	0.00110044	0.00090036	0.00180072	0.00130052	0.0015006	0.00060024	0.00170068	0.0015006	0.00160064	0.00170068	0.0020008	0.0020008	0.0030012	0.00190076	0.0030012	0.00270108	0.002501	0.00280112	0.0035014	0.00440176	0.00370148	0.0040016	0.00430172	0.00360144	0.00690276	0.00590236	0.0070028	0.005002	0.00870348	0.0095038	0.0136054	0.0111044	0.0179072	0.017507	0.0318127
N161997	0.000162615	0.000162615	0.00032523	0.000487845	0.000406537	0.00032523	0.00032523	0.00032523	8.13074e-05	0.000650459	0.000243922	0.000243922	0.000487845	0.000569152	0.000243922	0.00032523	0.000487845	0.00032523	0.000406537	0.00032523	0.000650459	0.000243922	0.000731767	0.001057	0.000894382	0.000975689	0.00146353	0.000975689	0.00146353	0.000813074	0.00203269	0.00211399	0.00170746	0.00276445	0.00227661	0.00235792	0.00382145	0.00382145	0.00561021	0.00650459	0.00861859	0.00780551	0.00991951	0.0102447	0.0181316	0.0204895	0.0352874	0.037564	0.0746402
N162051	0.000690131	0.000517598	0.000776398	0.000431332	0.000517598	0.000603865	0.000690131	0.000862664	0.000603865	0.000690131	0.0010352	0.000776398	0.000431332	0.001294	0.0010352	0.000862664	0.00146653	0.000258799	0.00120773	0.000862664	0.000431332	0.000776398	0.000690131	0.000690131	0.00112146	0.00094893	0.00181159	0.00138026	0.00198413	0.00146653	0.00207039	0.001294	0.00301932	0.001294	0.00319186	0.00301932	0.00215666	0.00310559	0.00465839	0.00284679	0.00586611	0.00534852	0.00785024	0.00888544	0.0114734	0.0110421	0.0170807	0.0213078	0.0452036
N162058	0.001053	0.003861	0.002106	0.003861	0.0040365	0.003861	0.00561601	0.003159	0.00351	0.0026325	0.004563	0.0033345	0.003159	0.003861	0.004563	0.0036855	0.00508951	0.00508951	0.0033345	0.00508951	0.00351	0.0047385	0.0036855	0.003861	0.0033345	0.0033345	0.004563	0.0040365	0.0036855	0.00508951	0.0047385	0.0047385	0.00649351	0.004563	0.00666901	0.004914	0.00737101	0.00614251	0.00737101	0.00754651	0.00824851	0.00649351	0.0110565	0.00912601	0.0149175	0.014742	0.018252	0.0156195	0.0289575
N162059	0.00128894	0.00128894	0.000966702	0.00150376	0.00139635	0.00075188	0.00075188	0.00118153	0.00128894	0.00107411	0.00171858	0.00128894	0.000966702	0.00075188	0.00150376	0.00107411	0.00150376	0.00150376	0.00171858	0.000644468	0.00139635	0.00118153	0.00107411	0.00171858	0.00204082	0.000966702	0.0019334	0.000966702	0.00257787	0.00204082	0.0019334	0.00128894	0.00161117	0.0019334	0.00236305	0.00171858	0.00300752	0.00311493	0.00322234	0.00397422	0.00590763	0.00483351	0.00590763	0.00590763	0.00934479	0.00923738	0.0198711	0.0237379	0.046724
N162113	0.00204622	0.00260428	0.00352007	0.00226086	0.00339129	0.00357731	0.00350576	0.00280461	0.0034199	0.00277599	0.00373471	0.00291908	0.00366316	0.00266152	0.00386349	0.00313372	0.00422122	0.00363454	0.00404951	0.0034199	0.00402089	0.00366316	0.00477928	0.00402089	0.00456464	0.00410675	0.00453602	0.00409244	0.00609573	0.00486514	0.00590971	0.00475066	0.00693997	0.00535165	0.00692566	0.00622451	0.00778422	0.00735494	0.00925807	0.00831366	0.0110467	0.0101023	0.0126064	0.0109466	0.016241	0.0148387	0.0202475	0.0210059	0.0344423
N162170	0.00073185	0.00087822	0.00109778	0.00058548	0.00131733	0.000951405	0.00087822	0.00102459	0.00087822	0.000951405	0.00117096	0.000805035	0.0014637	0.00109778	0.00153689	0.000805035	0.00182963	0.00131733	0.001976	0.00168326	0.00226874	0.00117096	0.00234192	0.00175644	0.00161007	0.0014637	0.00248829	0.00248829	0.00270785	0.00256148	0.00380562	0.00219555	0.00322014	0.00300059	0.00365925	0.00453747	0.00658665	0.00534251	0.00702576	0.00658665	0.00790398	0.00900176	0.0122951	0.0128806	0.0140515	0.0171253	0.0274444	0.0278103	0.0507904
N162237	0.0012217	0.00218769	0.00164787	0.00224451	0.00198881	0.00207404	0.00301162	0.00230133	0.00227292	0.00213086	0.00261386	0.00275592	0.00281274	0.00244339	0.00315368	0.00289797	0.00292639	0.00235816	0.00340938	0.00309685	0.00309685	0.00360826	0.0039492	0.00357985	0.00411967	0.00329574	0.0049436	0.00411967	0.00585277	0.00457425	0.00534136	0.00491519	0.00613689	0.00539819	0.00698923	0.00593801	0.00829616	0.00724494	0.00923374	0.00687559	0.0113646	0.00997244	0.0127852	0.0114783	0.0163082	0.0159957	0.0225872	0.0223599	0.0390658
N162254	0.000586441	0.000586441	0.00140746	0.000821018	0.000938306	0.0014661	0.00152475	0.00140746	0.00140746	0.00134882	0.0014661	0.0014661	0.00152475	0.00129017	0.00140746	0.00152475	0.00193526	0.00158339	0.00175932	0.00175932	0.00158339	0.0025217	0.00205255	0.00170068	0.00258034	0.00246305	0.00287356	0.0025217	0.00375323	0.00316678	0.00404645	0.00269763	0.0050434	0.00410509	0.00533662	0.0039878	0.0065095	0.00615764	0.0075651	0.00738916	0.0104387	0.00844476	0.013019	0.0116115	0.0190593	0.0162444	0.0259207	0.0251583	0.044159
N162263	0.00174902	0.00256106	0.00312324	0.00193641	0.00312324	0.00318571	0.00299831	0.00281092	0.00281092	0.00331064	0.00343557	0.00243613	0.00274845	0.00312324	0.00393529	0.00262352	0.00424761	0.00293585	0.00406022	0.00287338	0.00487226	0.00362296	0.00487226	0.00468486	0.00493472	0.00374789	0.00699606	0.00537198	0.00643388	0.00649635	0.00755825	0.00668374	0.00943219	0.00593416	0.00949466	0.00680867	0.0102442	0.00930726	0.0113061	0.0106815	0.0121806	0.0109314	0.0151165	0.0126804	0.0179899	0.0188019	0.0259854	0.0269224	0.0457243
N162281	0.00143847	0.00300772	0.0026154	0.00287695	0.00196155	0.0026154	0.00300772	0.00222309	0.00300772	0.00235386	0.00457696	0.00340003	0.00274617	0.00183078	0.00340003	0.00170001	0.00300772	0.00313849	0.00274617	0.00313849	0.00496927	0.00340003	0.00300772	0.0035308	0.00444619	0.00379234	0.00470773	0.00326926	0.00444619	0.00248463	0.00562312	0.00340003	0.00523081	0.0048385	0.00706159	0.00549235	0.00823852	0.00797698	0.00889238	0.0102001	0.0120309	0.0111155	0.0181771	0.0205309	0.025631	0.0255002	0.0379234	0.0430234	0.0809468
N162365	0.000553578	0.000711744	0.00126532	0.000948992	0.000474496	0.000869909	0.000790826	0.00118624	0.000632661	0.000553578	0.000395413	0.000869909	0.000869909	0.000632661	0.0013444	0.000711744	0.00166074	0.00118624	0.00126532	0.00126532	0.00118624	0.0018189	0.00166074	0.00102807	0.00118624	0.000948992	0.00142349	0.00126532	0.00173982	0.0013444	0.0013444	0.0013444	0.00166074	0.00126532	0.00205615	0.00166074	0.00284698	0.00237248	0.00332147	0.00371688	0.00561487	0.00498221	0.00925267	0.00664294	0.0107552	0.0117833	0.0207197	0.0236457	0.0548043
N162430	0.00129282	0.00193924	0.00280112	0.00237018	0.00204697	0.00172377	0.00172377	0.00237018	0.00193924	0.00204697	0.0018315	0.00215471	0.00247791	0.00323206	0.0033398	0.00215471	0.00258565	0.00215471	0.00323206	0.00258565	0.00193924	0.00290886	0.00463262	0.00226244	0.00377074	0.0018315	0.00344753	0.00323206	0.00247791	0.00398621	0.00452489	0.00323206	0.00430942	0.00452489	0.00667959	0.00409395	0.00581771	0.00484809	0.00689507	0.00549451	0.00829563	0.00743374	0.00904977	0.0106658	0.013036	0.0132515	0.0182073	0.0241327	0.0374919
N162497	0.001	0.00122222	0.00138889	0.00127778	0.00116667	0.001	0.00133333	0.00166667	0.00155556	0.00155556	0.000944444	0.00127778	0.00111111	0.00144444	0.00138889	0.00161111	0.0025	0.00155556	0.00233333	0.00211111	0.00261111	0.00177778	0.00311111	0.00244444	0.00388889	0.00311111	0.00366667	0.00244444	0.00483333	0.00366667	0.00516667	0.005	0.00605556	0.00594444	0.00755556	0.006	0.00866667	0.00672222	0.0108889	0.0101667	0.0133889	0.0123333	0.0183889	0.0174444	0.0242222	0.0227222	0.0319444	0.0356667	0.0601667
N162546	8.85426e-05	0.000177085	0.000531256	8.85426e-05	8.85426e-05	0.000177085	0.000531256	0.000885426	0.00035417	0.000619798	0.00115105	0.000708341	0.00115105	0	0.000796883	0.000531256	0.000885426	0.000973968	0.000796883	0.000885426	0.00115105	0.000708341	0.0012396	0.00132814	0.00141668	0.00177085	0.00132814	0.00168231	0.00247919	0.00256774	0.00194794	0.00318753	0.00389587	0.00185939	0.00442713	0.00309899	0.00655215	0.00593235	0.00743758	0.00788029	0.0105366	0.0100053	0.0144324	0.0142554	0.0204533	0.0203648	0.0302816	0.0348858	0.0612715
N162559	0.00103413	0.00186143	0.00175801	0.000930714	0.00268873	0.00237849	0.00206825	0.00206825	0.0016546	0.00155119	0.00268873	0.00186143	0.00237849	0.00144778	0.00217166	0.00186143	0.00206825	0.00268873	0.0024819	0.00196484	0.00268873	0.00206825	0.00392968	0.00258532	0.00186143	0.00196484	0.00423992	0.00341262	0.00372285	0.00289555	0.00434333	0.00506722	0.00527404	0.00475698	0.00589452	0.00475698	0.00651499	0.00506722	0.00713547	0.0089969	0.00951396	0.00910031	0.0134436	0.011272	0.0172699	0.0155119	0.0264736	0.024819	0.0420889
N162579	0.00211542	0.00356978	0.0056852	0.00396642	0.00442917	0.00370199	0.0038342	0.00409863	0.00403252	0.00416474	0.00416474	0.00403252	0.00575131	0.00343756	0.00482581	0.0037681	0.00561909	0.00416474	0.0056852	0.00469359	0.00694123	0.00462749	0.00608184	0.00462749	0.00594963	0.00482581	0.00594963	0.00561909	0.00601573	0.00542077	0.0056852	0.0056852	0.00799894	0.00647848	0.00687512	0.00535466	0.00740398	0.00601573	0.00872612	0.00674291	0.0085939	0.00733787	0.0124281	0.00866001	0.0118993	0.0128909	0.0177828	0.0178489	0.0334501
N162599	0.00103289	0.000635627	0.00143016	0.000873987	0.000635627	0.00143016	0.0011918	0.00150961	0.0011918	0.000556174	0.00158907	0.00135071	0.0011918	0.00135071	0.0011918	0.00111235	0.00143016	0.0011918	0.00150961	0.00143016	0.00222469	0.00150961	0.00166852	0.00111235	0.00206579	0.00198633	0.00214524	0.00143016	0.00254251	0.00150961	0.00381376	0.00254251	0.0023836	0.00262196	0.00381376	0.00254251	0.00484666	0.00341649	0.00484666	0.00484666	0.00794534	0.00691244	0.00889878	0.00881932	0.0143811	0.0146194	0.021214	0.0267758	0.0558557
N162624	0.000575932	0.000636557	0.000969991	0.000484995	0.00081843	0.00081843	0.000909366	0.00103062	0.000879054	0.000727493	0.00081843	0.000939679	0.00106093	0.000879054	0.00121249	0.00103062	0.00112155	0.000969991	0.00163686	0.00112155	0.00187936	0.00109124	0.00212186	0.0012428	0.00169748	0.00193998	0.00233404	0.00154592	0.00245529	0.00203092	0.00303122	0.00242498	0.00369809	0.00287966	0.00412246	0.0034859	0.00536526	0.00454683	0.00618369	0.00539557	0.00775993	0.00721431	0.00982116	0.0096696	0.0137921	0.0140042	0.0195211	0.0210064	0.0362534
N162684	0.000857829	0.00194441	0.0014869	0.00171566	0.00171566	0.00120096	0.00177285	0.00171566	0.00194441	0.00154409	0.00228754	0.00131534	0.00154409	0.00165847	0.0014869	0.00120096	0.00188722	0.00217317	0.00223036	0.00154409	0.00131534	0.00142972	0.00194441	0.00131534	0.00188722	0.00205879	0.00257349	0.00165847	0.00183004	0.00154409	0.00274505	0.00263068	0.00314537	0.0025163	0.00234473	0.00240192	0.00360288	0.00268786	0.00360288	0.00285943	0.00497541	0.00383164	0.00537573	0.00594762	0.00806359	0.0110946	0.0154981	0.0176141	0.040032
N162735	0.00102843	0.00108893	0.00102843	0.00102843	0.00133091	0.000907441	0.00102843	0.00108893	0.00114943	0.00108893	0.000786449	0.000846945	0.000907441	0.00108893	0.00145191	0.00114943	0.00187538	0.00163339	0.00133091	0.000907441	0.00163339	0.00139141	0.00175439	0.00163339	0.00205687	0.00193587	0.00248034	0.0015729	0.00235935	0.00205687	0.00248034	0.00266183	0.00471869	0.00290381	0.00272232	0.00399274	0.00477919	0.00441621	0.00598911	0.00659407	0.00986086	0.00943739	0.0124622	0.0134301	0.0174834	0.0194192	0.0270417	0.03049	0.0598306
N162774	0.00136395	0.00253759	0.00317199	0.00260103	0.00317199	0.00203007	0.0035209	0.00222039	0.00263275	0.00275963	0.00272791	0.00253759	0.00291823	0.00241071	0.00304511	0.00253759	0.00348918	0.00244243	0.00345746	0.00288651	0.00355262	0.0032037	0.00294995	0.00250587	0.00390154	0.00329886	0.00406014	0.00298167	0.0044725	0.00380638	0.00488486	0.0039967	0.00602677	0.00434562	0.00612193	0.00517034	0.00580473	0.00593161	0.00729557	0.00681977	0.0083106	0.00792996	0.0113557	0.00954767	0.0125293	0.0133541	0.0182706	0.0211571	0.037366
N162804	0.000852839	0.00162953	0.00186559	0.00182751	0.00186559	0.00183513	0.00210164	0.00188843	0.00172852	0.00163715	0.00206357	0.00184274	0.00194173	0.00196458	0.00222347	0.00193412	0.00227678	0.00178944	0.00226916	0.00191127	0.00228439	0.00197981	0.00242146	0.00206357	0.00247476	0.00220063	0.00284787	0.00242146	0.00281742	0.00253567	0.00337328	0.0028631	0.00370833	0.00293925	0.0040586	0.00342659	0.00478961	0.00392915	0.0058252	0.00486575	0.00674657	0.00637345	0.00846748	0.00833041	0.0124728	0.0129677	0.0201331	0.0231637	0.0461066
N162827	0.000582411	0.000748814	0.00108162	0.000582411	0.000832016	0.000832016	0.000582411	0.000998419	0.000915218	0.00108162	0.000998419	0.000748814	0.000832016	0.00141443	0.000998419	0.000582411	0.00133123	0.00116482	0.000998419	0.00108162	0.000748814	0.000915218	0.00183044	0.000915218	0.00183044	0.00166403	0.00183044	0.00124802	0.00208004	0.00191364	0.00191364	0.00191364	0.00224644	0.00232964	0.00341127	0.00266245	0.00332806	0.00307846	0.00424328	0.00474249	0.00615692	0.00599052	0.00915218	0.00898577	0.0131459	0.0143939	0.0236293	0.028871	0.0603212
N162859	0	0.000203211	0.000203211	0.000203211	0.000203211	0.000101605	0.000711238	0.000101605	0.000304816	0.000609632	0.000304816	0.000203211	0.000304816	0.000304816	0.000304816	0.000406421	0.000101605	0.000304816	0.000508027	0.000406421	0.000203211	0.000203211	0.000711238	0.000406421	0.000812843	0.000609632	0.000304816	0.000812843	0.00111766	0.000609632	0.00121926	0.000914448	0.00264174	0.0019305	0.0018289	0.00223532	0.00325137	0.00365779	0.00396261	0.00467385	0.00731559	0.00589311	0.00914448	0.00985572	0.014428	0.0158504	0.0315993	0.0344442	0.0657387
N162873	0.000200924	0.000200924	0.000602773	0	0.000200924	0	0.000602773	0	0	0.000200924	0.000401849	0.000602773	0.000401849	0	0	0.000401849	0.000602773	0	0.000803697	0.000401849	0.000200924	0.000200924	0.000401849	0.000602773	0.000602773	0.000401849	0.000803697	0.000803697	0.00120555	0.000803697	0.00120555	0.000602773	0.00200924	0.000803697	0.000602773	0.000803697	0.00200924	0.00241109	0.00361664	0.00200924	0.00341571	0.00421941	0.00301386	0.00381756	0.00783605	0.00884067	0.0152702	0.0202933	0.0379747
N162946	0	0.000133191	0	0	0.000133191	0	0	0	0.000133191	0	0.000133191	0	0.000266383	0.000266383	0	0	0	0	0	0.000532765	0.000399574	0.000399574	0.000532765	0.000399574	0.000665956	0.000266383	0.000532765	0.000799148	0.000399574	0.000399574	0.000665956	0.000399574	0.000665956	0.000266383	0.000932339	0.00173149	0.0014651	0.00226425	0.00199787	0.00279702	0.0030634	0.00372936	0.00586042	0.00652637	0.00812467	0.0091902	0.0185136	0.0234417	0.0519446
N162976	0.00150376	0.00175439	0.00200501	0.00200501	0.00200501	0.00238095	0.00225564	0.00213033	0.00175439	0.00150376	0.00250627	0.00213033	0.00275689	0.00225564	0.00275689	0.00200501	0.00275689	0.00263158	0.00213033	0.00238095	0.00225564	0.00200501	0.00263158	0.00288221	0.00288221	0.00213033	0.00388471	0.00238095	0.00263158	0.00288221	0.00438596	0.00275689	0.00325815	0.00388471	0.00588972	0.00451128	0.0056391	0.00513784	0.00714286	0.00639098	0.00789474	0.00776942	0.00989975	0.00952381	0.0154135	0.0152882	0.023183	0.0275689	0.0522556
N162977	0.000150376	0.000150376	7.5188e-05	0	0.000225564	0.000150376	0.000225564	0.000225564	0.000150376	0.000225564	0.000225564	7.5188e-05	0.00037594	0.000150376	0.000150376	0.000676692	0.000451128	0.00105263	0.000827068	0.000676692	0.000902256	0.000902256	0.00112782	0.00135338	0.00172932	0.00112782	0.00278195	0.00210526	0.00330827	0.00203008	0.00300752	0.00315789	0.00593985	0.00443609	0.00721805	0.00706767	0.00917293	0.00857143	0.012782	0.0104511	0.0175188	0.0142105	0.0191729	0.0203759	0.0293233	0.0271429	0.0379699	0.0450376	0.0791729
N163034	0.00131579	0.00215311	0.00382775	0.0034689	0.00322967	0.00358852	0.00358852	0.0027512	0.00311005	0.00287081	0.00287081	0.00311005	0.00490431	0.00322967	0.00299043	0.00394737	0.00263158	0.00334928	0.00502392	0.00311005	0.0041866	0.00382775	0.00394737	0.0041866	0.00490431	0.00382775	0.00526316	0.00490431	0.00562201	0.00610048	0.00526316	0.00574163	0.00633971	0.00729665	0.00861244	0.0062201	0.00885167	0.00574163	0.00933014	0.0076555	0.00885167	0.00992823	0.011244	0.0116029	0.0145933	0.0131579	0.016866	0.017823	0.0318182
N163035	0.00380952	0.00592593	0.00867725	0.00634921	0.00719577	0.00539683	0.00740741	0.00719577	0.00603175	0.00613757	0.00719577	0.00645503	0.00772487	0.00518519	0.00846561	0.00507937	0.00656085	0.00592593	0.00793651	0.00698413	0.00698413	0.00582011	0.00814815	0.00507937	0.00888889	0.00539683	0.00730159	0.00751323	0.00687831	0.00677249	0.00772487	0.00698413	0.00952381	0.00677249	0.00899471	0.00730159	0.00910053	0.00740741	0.00994709	0.00814815	0.0113228	0.00941799	0.00835979	0.0106878	0.0122751	0.00846561	0.0128042	0.0101587	0.015873
N163076	0.000403193	0.000725748	0.000483832	0.000806387	0.000967664	0.000806387	0.000806387	0.000967664	0.000403193	0.000725748	0.000725748	0.000241916	0.00112894	0.000887025	0.000967664	0.000483832	0.000806387	0.000564471	0.000645109	0.000322555	0.000725748	0.000806387	0.000887025	0.000564471	0.000887025	0.00120958	0.000483832	0.00120958	0.00112894	0.000725748	0.00185469	0.00129022	0.00193533	0.00137086	0.00185469	0.00161277	0.00201597	0.00161277	0.00177405	0.00161277	0.00298363	0.00346746	0.0045964	0.00427385	0.00725748	0.00725748	0.012499	0.0167728	0.0395936
N163121	0	0.000743218	0.000743218	0.000371609	0.00185805	0.000743218	0	0.000743218	0.000743218	0.000371609	0.00111483	0.000743218	0.00148644	0.000371609	0.000743218	0.000371609	0.00111483	0.00111483	0.00111483	0.00222965	0.00185805	0.00222965	0.000743218	0.00111483	0.00222965	0.00148644	0.00148644	0.00148644	0.00297287	0.00222965	0.00260126	0.00148644	0.00371609	0.00371609	0.00185805	0.00185805	0.00557414	0.00297287	0.00557414	0.00594575	0.00780379	0.00297287	0.00854701	0.00743218	0.0104051	0.0126347	0.0222965	0.0252694	0.0464511
N163157	0	0	0.00018498	0.00018498	0	0.00018498	0	0.00018498	0	0.000369959	0	0	0	0.000369959	0.00018498	0.000369959	0.000369959	0.00018498	0.000369959	0.000369959	0.000739919	0.00110988	0.00110988	0.000369959	0.000924898	0.000369959	0.000554939	0.000739919	0.00147984	0.000739919	0.0018498	0.0018498	0.00240474	0.00129486	0.00332963	0.00295967	0.00277469	0.00369959	0.00351461	0.00517943	0.0107288	0.00739919	0.0146134	0.0125786	0.0175731	0.0190529	0.0347762	0.0371809	0.0789863
N163198	0.000700148	0.00107715	0.00145415	0.00125219	0.00114447	0.00156187	0.00148108	0.0014003	0.00125219	0.00110408	0.00145415	0.00118487	0.00160226	0.00115794	0.00150801	0.00130605	0.00184462	0.00156187	0.00189848	0.00166958	0.00224855	0.00170998	0.00214084	0.00179076	0.00223509	0.00203312	0.00254477	0.00216777	0.00309681	0.00274673	0.00327185	0.00289484	0.00386428	0.00337956	0.00492797	0.0035546	0.00549347	0.00495489	0.00624748	0.00537229	0.0082806	0.00771509	0.0108388	0.0102733	0.0160765	0.0155514	0.0246802	0.0272788	0.052942
N163284	0.000699301	0.00104895	0.00110723	0.0011655	0.0013986	0.00145688	0.00122378	0.00110723	0.00104895	0.00151515	0.00145688	0.000874126	0.00180653	0.00104895	0.000874126	0.000990676	0.0016317	0.00128205	0.0018648	0.00122378	0.00145688	0.00134033	0.00192308	0.000990676	0.00215618	0.00262238	0.0013986	0.00221445	0.00221445	0.00151515	0.00285548	0.00262238	0.00308858	0.00291375	0.00273893	0.00273893	0.00343823	0.0039627	0.0048951	0.00477855	0.00734266	0.00594406	0.00862471	0.0100233	0.0111888	0.0147436	0.0217949	0.0263403	0.0574009
N163303	0.000994575	0.00144665	0.00244123	0.00180832	0.00180832	0.00180832	0.00325497	0.00153707	0.00235081	0.00180832	0.0022604	0.00235081	0.00207957	0.00162749	0.0022604	0.00316456	0.00262206	0.00153707	0.00262206	0.0017179	0.00207957	0.00289331	0.00180832	0.0022604	0.00316456	0.00189873	0.0022604	0.00262206	0.00253165	0.0034358	0.00298373	0.00207957	0.0039783	0.00244123	0.00415913	0.00244123	0.00388788	0.00415913	0.00515371	0.00334539	0.00506329	0.00533454	0.00632911	0.00632911	0.00958409	0.00913201	0.0122966	0.0122061	0.0235986
N163353	0.000600673	0.00108121	0.00144161	0.000840942	0.000961076	0.00144161	0.000600673	0.00108121	0.000840942	0.00108121	0.00180202	0.00144161	0.00120135	0.000961076	0.00192215	0.00168188	0.000961076	0.00192215	0.00132148	0.00156175	0.00204229	0.00120135	0.00192215	0.00144161	0.00216242	0.00180202	0.00144161	0.00108121	0.00216242	0.00240269	0.00360404	0.00396444	0.00396444	0.00360404	0.00444498	0.00420471	0.00504565	0.00564632	0.00792888	0.00492552	0.0103316	0.00840942	0.0126141	0.0129745	0.0174195	0.0204229	0.0297934	0.0338779	0.0673955
N163486	0.000983372	0.000983372	0.00125156	0.000893975	0.00116217	0.00125156	0.00160915	0.00116217	0.00169855	0.00134096	0.000893975	0.00116217	0.00116217	0.00116217	0.00187735	0.00160915	0.00107277	0.00125156	0.00178795	0.00116217	0.00178795	0.00107277	0.00178795	0.00205614	0.00187735	0.00187735	0.00116217	0.00196674	0.000983372	0.00160915	0.00178795	0.00160915	0.00312891	0.00214554	0.0033971	0.00303951	0.00446987	0.00429108	0.00509566	0.00429108	0.00616842	0.0070624	0.0101913	0.0114429	0.0132308	0.0143036	0.0262829	0.0311103	0.0641874
N170018	0.00201926	0.00232992	0.00333955	0.00287356	0.00287356	0.00295123	0.00357254	0.00256291	0.00318422	0.0036502	0.00411619	0.00295123	0.0036502	0.0027959	0.00427151	0.0027959	0.00372787	0.00333955	0.00403852	0.00295123	0.00388319	0.00295123	0.00434918	0.0027959	0.00372787	0.00287356	0.00489282	0.00442684	0.00590245	0.00310655	0.00411619	0.00333955	0.0047375	0.00357254	0.00380553	0.0047375	0.00442684	0.00419385	0.00629077	0.00442684	0.00566946	0.00605778	0.009242	0.0073004	0.0111836	0.0118049	0.0203479	0.0231438	0.0468313
N170874	0.00351865	0.00506685	0.00752991	0.00654469	0.00788177	0.00647431	0.00724842	0.00724842	0.00668543	0.00570021	0.00752991	0.00577058	0.00668543	0.00661506	0.00738916	0.00457424	0.0078114	0.00541872	0.00731879	0.00626319	0.00689655	0.00534835	0.00689655	0.0052076	0.00654469	0.00471499	0.00633357	0.00464462	0.00577058	0.0044335	0.00584096	0.00527797	0.00584096	0.00562984	0.00584096	0.00478536	0.00654469	0.00464462	0.00774103	0.00584096	0.00837438	0.00640394	0.00809289	0.00640394	0.0128783	0.0101337	0.0143561	0.0137931	0.0269529
N170893	0.00291153	0.00328481	0.00492721	0.00373274	0.0039567	0.00418066	0.00507652	0.00418066	0.00582307	0.00432997	0.00515118	0.0047779	0.00470325	0.00321015	0.00410601	0.00410601	0.00552445	0.00388205	0.00410601	0.00343412	0.00470325	0.00418066	0.00552445	0.00388205	0.00462859	0.00447928	0.00455394	0.00350877	0.00537514	0.00440463	0.00649496	0.00462859	0.00679358	0.00500187	0.00589772	0.00544979	0.00612169	0.00664427	0.00731616	0.00671892	0.0087346	0.00604703	0.00895857	0.00783875	0.0100784	0.0111236	0.0141844	0.016872	0.0326241
NO120430	0.000385632	0.000826355	0.000771265	0.000495813	0.000605994	0.000550903	0.000881446	0.000605994	0.000661084	0.000495813	0.000605994	0.000330542	0.000936536	0.000661084	0.000661084	0.000771265	0.0011569	0.000826355	0.00104672	0.000826355	0.000881446	0.000881446	0.000716175	0.00104672	0.000936536	0.000440723	0.000991626	0.000771265	0.00121199	0.000716175	0.00126708	0.00110181	0.00137726	0.000881446	0.00143235	0.00126708	0.00258925	0.00126708	0.00209343	0.00247907	0.00247907	0.00308506	0.00396651	0.00347069	0.00639048	0.00721684	0.0105223	0.0149295	0.03658
NO120582	0.0001485	0	0.000891001	0.000742501	0.001188	0.0010395	0.0013365	0.0001485	0.0004455	0.000891001	0.000742501	0.0004455	0.000594001	0.000742501	0.0001485	0.000297	0.000594001	0.000297	0.001188	0.000742501	0.0004455	0.0010395	0.001782	0.000742501	0.001782	0.0013365	0.001188	0.001782	0.0016335	0.001782	0.0010395	0.0019305	0.0022275	0.0013365	0.003564	0.002079	0.0025245	0.002079	0.0043065	0.00504901	0.00742501	0.00653401	0.00965251	0.00816751	0.0144045	0.0144045	0.022572	0.0298485	0.0573211
NO120714	0.001294	0.0015528	0.00207039	0.00181159	0.00181159	0.00258799	0.00181159	0.0015528	0.00207039	0.00181159	0.00258799	0.0015528	0.00207039	0.0010352	0.000776398	0.0015528	0.0015528	0.0010352	0.00310559	0.00310559	0.00284679	0.00232919	0.00258799	0.0015528	0.00310559	0.00258799	0.00181159	0.00258799	0.00232919	0.00362319	0.00517598	0.00414079	0.00517598	0.00439959	0.00621118	0.00439959	0.00465839	0.00646998	0.00854037	0.00776398	0.00905797	0.00957557	0.0121636	0.00776398	0.0170807	0.0139752	0.0227743	0.0274327	0.047619
NO120975	0.000125313	0.00037594	0.000877193	0.000626566	0.000877193	0.00100251	0.00037594	0.000626566	0.000626566	0.000501253	0.000877193	0.000501253	0.000501253	0.000626566	0.000501253	0.000501253	0.000501253	0.00137845	0.00112782	0.00125313	0.00213033	0.00137845	0.00112782	0.00100251	0.00238095	0.00175439	0.00162907	0.00175439	0.00313283	0.00200501	0.00250627	0.00438596	0.00238095	0.00300752	0.0037594	0.00350877	0.0047619	0.00438596	0.00626566	0.00576441	0.0102757	0.00776942	0.0141604	0.012406	0.0161654	0.0182957	0.0276942	0.0281955	0.0562657
NO121937	0.00261057	0.00552826	0.00476044	0.00568182	0.00552826	0.00399263	0.00675676	0.00460688	0.00429975	0.00476044	0.00752457	0.00522113	0.00506757	0.00522113	0.00629607	0.00460688	0.00522113	0.004914	0.00660319	0.00291769	0.00522113	0.00506757	0.00721744	0.00506757	0.00568182	0.00460688	0.00614251	0.00476044	0.00583538	0.00537469	0.00583538	0.00414619	0.00429975	0.00460688	0.00644963	0.00353194	0.00429975	0.00476044	0.00476044	0.00445332	0.00614251	0.00506757	0.00568182	0.00383907	0.00552826	0.00583538	0.00982801	0.00936732	0.0181204
NO121940	0.0015873	0.00283447	0.00351474	0.00226757	0.00260771	0.00260771	0.00453515	0.00306122	0.00238095	0.00226757	0.00408163	0.00136054	0.00396825	0.00260771	0.00328798	0.00283447	0.00408163	0.00328798	0.00385488	0.00385488	0.00283447	0.00294785	0.00430839	0.0031746	0.0031746	0.00362812	0.0047619	0.00408163	0.00430839	0.00396825	0.00362812	0.0047619	0.00419501	0.00419501	0.00487528	0.00464853	0.00725624	0.00578231	0.00657596	0.00782313	0.00918367	0.00600907	0.00782313	0.00793651	0.0102041	0.0105442	0.0139456	0.015873	0.0206349
TCGA-2A-A8VL	0.000737055	0.00147411	0.00147411	0.00110558	0.00147411	0.00184264	0.00128985	0.00147411	0.00239543	0.00110558	0.00239543	0.00110558	0.00165837	0.00128985	0.0020269	0.00257969	0.00221117	0.00313249	0.0020269	0.00184264	0.00350101	0.00313249	0.00313249	0.00276396	0.00165837	0.00165837	0.00350101	0.00276396	0.0046066	0.00515939	0.00497512	0.0046066	0.00405381	0.00681776	0.00755482	0.00773908	0.00939746	0.00939746	0.00995025	0.0130827	0.016031	0.0119772	0.0222959	0.0213746	0.0340888	0.0427492	0.0648609	0.0801548	0.15386
TCGA-2A-A8VO	0.00169227	0.00312419	0.00455611	0.00377506	0.00195262	0.00455611	0.00442593	0.00442593	0.00312419	0.00325436	0.00195262	0.00299401	0.00455611	0.00312419	0.00429576	0.00377506	0.00312419	0.00403541	0.00429576	0.00403541	0.0061182	0.00429576	0.00429576	0.00416558	0.00624837	0.00442593	0.0066389	0.00351471	0.00794064	0.00676907	0.00598802	0.00494663	0.00846134	0.00741994	0.00950273	0.011195	0.0154908	0.011976	0.0132778	0.0118459	0.0182244	0.0190055	0.0234314	0.0242124	0.0361885	0.0343661	0.0607915	0.0585785	0.107915
TCGA-2A-A8VT	0.00219342	0.00239282	0.00239282	0.00378863	0.00418744	0.00159521	0.00299103	0.00199402	0.00299103	0.00319043	0.00319043	0.00438684	0.00358923	0.00159521	0.00398804	0.00259222	0.00319043	0.00338983	0.00418744	0.00438684	0.00358923	0.00398804	0.00279163	0.00338983	0.00518445	0.00358923	0.00578265	0.00638086	0.00618146	0.00538385	0.00638086	0.00638086	0.00817547	0.00598205	0.0125623	0.00677966	0.00737787	0.0141575	0.0109671	0.0121635	0.0179462	0.018345	0.025324	0.0215354	0.0382851	0.0346959	0.0604187	0.064008	0.118445
TCGA-2A-A8VV	0.00394059	0.0054562	0.00788118	0.00636557	0.00484995	0.00697181	0.00636557	0.00666869	0.00757805	0.00454683	0.0081843	0.00515308	0.00788118	0.00666869	0.00666869	0.00454683	0.00636557	0.00697181	0.00575932	0.00606244	0.010003	0.00606244	0.00666869	0.00969991	0.00727493	0.00939679	0.00848742	0.00666869	0.0103062	0.00848742	0.0109124	0.00636557	0.0106093	0.00969991	0.0115186	0.0109124	0.0154592	0.0136405	0.014853	0.017278	0.0221279	0.0166717	0.0257654	0.0203092	0.0254623	0.0294028	0.039709	0.0436496	0.0897242
TCGA-2A-A8VX	0.0011873	0.00267142	0.00534283	0.00237459	0.00385871	0.00237459	0.00356189	0.00474918	0.00534283	0.00445236	0.00474918	0.00237459	0.00504601	0.00326506	0.00326506	0.00445236	0.00237459	0.00237459	0.00356189	0.00445236	0.00534283	0.00385871	0.00563966	0.00474918	0.00356189	0.00593648	0.00771742	0.0062333	0.00831107	0.00801425	0.00890472	0.00653013	0.00801425	0.00682695	0.00949837	0.00653013	0.00920154	0.0127634	0.0178094	0.0145444	0.0279015	0.0210745	0.02523	0.0317602	0.048976	0.0445236	0.0837044	0.0834075	0.146631
TCGA-2A-A8W1	0.00618325	0.00618325	0.0112423	0.00899382	0.00786959	0.00899382	0.00899382	0.0106802	0.0084317	0.00674536	0.0123665	0.00955593	0.0134907	0.00730748	0.00786959	0.0123665	0.0118044	0.00786959	0.00899382	0.00618325	0.0118044	0.0106802	0.0084317	0.00786959	0.0129286	0.00730748	0.014615	0.0118044	0.0157392	0.0123665	0.0129286	0.0123665	0.00899382	0.0168634	0.019674	0.0129286	0.0252951	0.019674	0.0286678	0.0219224	0.0331647	0.0219224	0.0370995	0.0320405	0.0354132	0.0365374	0.0629567	0.0607083	0.0730748
TCGA-2A-A8W3	0.00116741	0.00350222	0.0037357	0.00303526	0.00210133	0.00303526	0.00420266	0.00350222	0.00303526	0.00350222	0.00420266	0.00280177	0.00233481	0.00396918	0.00350222	0.00607051	0.00466962	0.00443614	0.00233481	0.00350222	0.00466962	0.00466962	0.00537007	0.00420266	0.00677095	0.00700444	0.00887229	0.00583703	0.0074714	0.00933925	0.0086388	0.00817184	0.0133084	0.00957273	0.012608	0.0109736	0.012141	0.0119075	0.0175111	0.018912	0.0277843	0.024749	0.0338548	0.031053	0.0466962	0.0464628	0.0737801	0.0754144	0.128415
TCGA-2A-AAYF	0.00263635	0.00131817	0.00197726	0.00197726	0.00131817	0.00247158	0.00313066	0.00296589	0.00263635	0.00181249	0.00395452	0.00197726	0.00296589	0.00263635	0.00247158	0.00296589	0.00362498	0.00247158	0.00263635	0.00280112	0.00247158	0.00411929	0.00329544	0.00395452	0.00444884	0.00395452	0.00444884	0.00461361	0.00724996	0.00543747	0.0087329	0.00692042	0.00840336	0.00840336	0.0112045	0.0110397	0.015159	0.0140056	0.0181249	0.0156533	0.0235624	0.0201022	0.0311419	0.0250453	0.0430054	0.0451475	0.0609656	0.0629428	0.114681
TCGA-2A-AAYO	0.00205539	0.00421895	0.00324535	0.0040026	0.00486802	0.00475984	0.00443531	0.00421895	0.00443531	0.00367806	0.00508438	0.0040026	0.00475984	0.00454349	0.0064907	0.00454349	0.00530074	0.00638252	0.00659887	0.00519256	0.00594981	0.00573345	0.00778884	0.00594981	0.00832973	0.0064907	0.0100606	0.00713977	0.00941151	0.00778884	0.012765	0.0102769	0.0103851	0.010926	0.0161186	0.0106015	0.0155777	0.0164431	0.0216357	0.018174	0.0259628	0.0214193	0.0340762	0.0274773	0.0419732	0.0460839	0.063717	0.0591735	0.0951969
TCGA-2A-AAYU	0.000966339	0.00322113	0.0037043	0.00386536	0.00306007	0.00306007	0.0037043	0.00386536	0.00531487	0.00338219	0.00322113	0.00354324	0.00386536	0.00306007	0.00499275	0.00338219	0.00531487	0.00177162	0.0048317	0.00467064	0.00595909	0.0048317	0.00756966	0.00467064	0.00805283	0.00531487	0.00934128	0.00789177	0.00918022	0.00918022	0.0103076	0.00982445	0.0115961	0.0099855	0.0119182	0.0138509	0.0159446	0.0136898	0.02287	0.0169109	0.025769	0.0241585	0.0330166	0.0301176	0.0402641	0.0441295	0.0669995	0.0618457	0.107264
TCGA-4L-AA1F	0.00779589	0.00921332	0.0155918	0.00566974	0.00566974	0.0113395	0.0141743	0.0106308	0.0127569	0.00921332	0.0106308	0.00921332	0.0134656	0.00850461	0.0212615	0.0141743	0.0134656	0.00992204	0.0127569	0.0163005	0.0170092	0.0141743	0.0141743	0.0120482	0.0248051	0.00637845	0.0134656	0.0127569	0.0170092	0.0127569	0.0141743	0.00992204	0.0191354	0.0155918	0.0177179	0.0205528	0.0177179	0.0233877	0.0290574	0.0198441	0.0297661	0.0304748	0.0396882	0.0368533	0.0304748	0.0318923	0.0460666	0.0453579	0.060241
TCGA-CH-5737	0.00116279	0.00465116	0.00116279	0.0104651	0.00581395	0.00581395	0.00581395	0.00232558	0.00697674	0.00581395	0.00232558	0.00697674	0.00465116	0	0.00116279	0.00697674	0.00348837	0.00232558	0.00930233	0.00813953	0.00465116	0.00465116	0.0104651	0.00348837	0.00697674	0.0127907	0.0116279	0.0104651	0.00348837	0.00813953	0.00930233	0.00697674	0.0127907	0.0139535	0.00581395	0.00930233	0.0209302	0.0162791	0.0174419	0.0162791	0.0325581	0.0162791	0.027907	0.0290698	0.044186	0.0465116	0.0709302	0.0837209	0.147674
TCGA-CH-5738	0.00691244	0.00691244	0.0103687	0.00806452	0.00921659	0.00691244	0.00806452	0.00576037	0.00921659	0.00115207	0.0184332	0.0115207	0.00806452	0.0126728	0.014977	0.0138249	0.00921659	0.00691244	0.00806452	0.00921659	0.0103687	0.00921659	0.0138249	0.0172811	0.0103687	0.0103687	0.0138249	0.014977	0.0230415	0.00806452	0.0115207	0.0184332	0.0184332	0.0172811	0.0218894	0.00921659	0.0172811	0.016129	0.0138249	0.0195853	0.016129	0.0172811	0.0357143	0.0276498	0.0299539	0.0357143	0.0610599	0.0380184	0.0714286
TCGA-CH-5739	0.0021692	0.00867679	0.00433839	0	0.0021692	0.00867679	0.00650759	0.00867679	0.00650759	0.00433839	0.00650759	0.00867679	0.0021692	0.00867679	0.00650759	0.00433839	0.00650759	0.010846	0.0021692	0.00867679	0.00867679	0.00650759	0.00433839	0.0021692	0.010846	0.0130152	0.010846	0.0021692	0.00433839	0.00867679	0.0151844	0.0195228	0.00650759	0.010846	0.0151844	0.0130152	0.0151844	0.021692	0.0260304	0.0195228	0.0260304	0.0195228	0.0347072	0.0390456	0.0477223	0.0368764	0.0715835	0.0737527	0.114967
TCGA-CH-5740	0.00220913	0.00368189	0.00294551	0.000736377	0.00294551	0.00368189	0.00515464	0.00441826	0.00147275	0.00368189	0.00147275	0.00736377	0.00368189	0.00368189	0.00441826	0.00220913	0.00294551	0.00441826	0.00294551	0.00147275	0.00810015	0.00294551	0.000736377	0.00736377	0.00515464	0.00220913	0.00589102	0.00368189	0.00662739	0	0.00736377	0.00589102	0.00736377	0.00662739	0.0095729	0.00810015	0.0132548	0.0110457	0.0095729	0.0154639	0.0154639	0.0139912	0.0139912	0.0243004	0.0309278	0.0243004	0.0530191	0.0736377	0.13623
TCGA-CH-5741	0.00101112	0.0141557	0.0141557	0.0091001	0.00707786	0.0111223	0.016178	0.0151668	0.0091001	0.0101112	0.0151668	0.00808898	0.0232558	0.00707786	0.0192113	0.00404449	0.00808898	0.00505561	0.0151668	0.0111223	0.0121335	0.016178	0.016178	0.0202224	0.0171891	0.0212336	0.0212336	0.0222447	0.0171891	0.0202224	0.0242669	0.016178	0.0192113	0.0171891	0.0171891	0.0151668	0.0283114	0.0192113	0.0232558	0.0212336	0.0364004	0.0202224	0.0273003	0.016178	0.0232558	0.0242669	0.016178	0.0202224	0.0192113
TCGA-CH-5743	0.00583658	0.00389105	0.00972763	0.00486381	0.00875486	0.00875486	0.00680934	0.00875486	0.0136187	0.00583658	0.00680934	0.0126459	0.00680934	0.00875486	0.0107004	0.0107004	0.0126459	0.00680934	0.0126459	0.00583658	0.00486381	0.00680934	0.0077821	0.0077821	0.016537	0.00875486	0.0107004	0.0155642	0.0136187	0.0107004	0.0155642	0.00875486	0.0126459	0.00972763	0.020428	0.0145914	0.0243191	0.0184825	0.0233463	0.0194553	0.0301556	0.016537	0.0252918	0.0262646	0.0291829	0.0330739	0.057393	0.0583658	0.077821
TCGA-CH-5744	0.000962464	0.00288739	0.00481232	0.00577478	0.00673725	0.00481232	0.00384986	0.00192493	0.00577478	0.00384986	0.00481232	0.00288739	0.00577478	0.00673725	0.00769971	0.00384986	0.00192493	0.00866218	0.0105871	0.00577478	0.0105871	0.00577478	0.00192493	0.00673725	0.0105871	0.00577478	0.00866218	0.00866218	0.00769971	0.00192493	0.00481232	0.00481232	0.0163619	0.00673725	0.014437	0.0134745	0.0182868	0.014437	0.0182868	0.012512	0.0115496	0.0163619	0.0173244	0.0221367	0.0461983	0.0346487	0.0413859	0.0279115	0.0683349
TCGA-CH-5745	0.00759878	0.00151976	0.00607903	0.00607903	0.0136778	0.00911854	0.0106383	0.0121581	0.00607903	0.00911854	0.00303951	0.00303951	0.0106383	0.0106383	0.0136778	0.00759878	0.0106383	0.0136778	0.00455927	0.00759878	0.0136778	0.0121581	0.0167173	0.00759878	0.0182371	0.0121581	0.0243161	0.0106383	0.0151976	0.0151976	0.0167173	0.0167173	0.0151976	0.0243161	0.0182371	0.0319149	0.0288754	0.0212766	0.0227964	0.0258359	0.0258359	0.0440729	0.0364742	0.0319149	0.0319149	0.0364742	0.0577508	0.0455927	0.0486322
TCGA-CH-5746	0.00390625	0.00976562	0.0078125	0.0078125	0.015625	0.0117188	0.0214844	0.00585938	0.015625	0.00195312	0.00585938	0.00585938	0.015625	0.00390625	0.0078125	0.00390625	0.0136719	0.0175781	0.0117188	0.00976562	0.0273438	0.0214844	0.0117188	0.0078125	0.00976562	0.0117188	0.0234375	0.0273438	0.0175781	0.0136719	0.0117188	0.015625	0.0117188	0.015625	0.0214844	0.0117188	0.0292969	0.0214844	0.0195312	0.0175781	0.0234375	0.0117188	0.0332031	0.0371094	0.0332031	0.03125	0.0546875	0.0332031	0.078125
TCGA-CH-5748	0.000755858	0.00680272	0.00529101	0.00302343	0.00377929	0.00377929	0.00529101	0.00604686	0.00377929	0.00302343	0.00529101	0.00377929	0.00529101	0.00453515	0.010582	0.00453515	0.00453515	0.00453515	0.00831444	0.00151172	0.00453515	0.00680272	0.0120937	0.00377929	0.00680272	0.00529101	0.00604686	0.00529101	0.00831444	0.00680272	0.00831444	0.00453515	0.00680272	0.00604686	0.0151172	0.0128496	0.0166289	0.0143613	0.0143613	0.0196523	0.0226757	0.0272109	0.0385488	0.0279667	0.0468632	0.0483749	0.0634921	0.0597128	0.130008
TCGA-CH-5750	0.00242277	0.00635978	0.00605694	0.0045427	0.00514839	0.00484555	0.00635978	0.00605694	0.00635978	0.00484555	0.00696548	0.00575409	0.00847971	0.00575409	0.00605694	0.00757117	0.00545124	0.00545124	0.00696548	0.00787402	0.00726832	0.00726832	0.00575409	0.00423985	0.00817686	0.00635978	0.0109025	0.00757117	0.0102968	0.00999394	0.0124167	0.0112053	0.00635978	0.0112053	0.011811	0.0124167	0.017868	0.013931	0.0193822	0.0154452	0.0221078	0.0148395	0.0330103	0.0266505	0.0436099	0.0366445	0.0466384	0.0523925	0.0781345
TCGA-CH-5751	0.015748	0.0137795	0.00984252	0.00787402	0.00787402	0.00984252	0.0019685	0.015748	0.0216535	0.0137795	0.011811	0.00984252	0.0137795	0.0019685	0.00590551	0.011811	0.00984252	0.011811	0.015748	0.011811	0.015748	0.015748	0.0295276	0.015748	0.015748	0.019685	0.0314961	0.0137795	0.0177165	0.00787402	0.015748	0.0177165	0.0334646	0.00984252	0.0216535	0.023622	0.0137795	0.015748	0.0255906	0.0216535	0.0275591	0.00590551	0.019685	0.0177165	0.0393701	0.0255906	0.0452756	0.0334646	0.0570866
TCGA-CH-5752	0.00848356	0.00530223	0.00954401	0.00424178	0.00954401	0.00848356	0.0116649	0.00742312	0.00530223	0.0180276	0.00636267	0.00636267	0.00848356	0.00848356	0.0159067	0.00848356	0.00954401	0.00848356	0.0127253	0.00954401	0.0148462	0.00636267	0.00636267	0.0137858	0.019088	0.00742312	0.00636267	0.0159067	0.0169671	0.019088	0.0275716	0.019088	0.019088	0.0106045	0.0201485	0.0180276	0.0360551	0.0201485	0.0201485	0.0275716	0.0307529	0.0233298	0.0424178	0.028632	0.0445387	0.0360551	0.0519618	0.0434783	0.0593849
TCGA-CH-5753	0.000990099	0.0108911	0.0118812	0.00891089	0.0039604	0.0118812	0.0118812	0.0108911	0.00792079	0.00693069	0.00891089	0.00792079	0.0138614	0.00891089	0.0108911	0.00594059	0.00990099	0.0019802	0.0138614	0.00990099	0.00891089	0.0158416	0.00792079	0.0108911	0.0237624	0.00792079	0.0138614	0.0118812	0.0158416	0.0148515	0.0158416	0.0138614	0.0148515	0.019802	0.0138614	0.0247525	0.0267327	0.019802	0.0366337	0.029703	0.0326733	0.0376238	0.0366337	0.0435644	0.0534653	0.0376238	0.0465347	0.0336634	0.0455446
TCGA-CH-5754	0.00846262	0.00705219	0.0141044	0.0112835	0.0169252	0.0169252	0.0126939	0.0126939	0.00846262	0.00846262	0.0141044	0.00564175	0.00705219	0.00564175	0.0267983	0.0112835	0.0197461	0.0126939	0.00987306	0.00987306	0.0197461	0.0126939	0.0183357	0.0141044	0.0197461	0.0155148	0.0126939	0.00705219	0.0155148	0.0112835	0.0169252	0.0197461	0.0211566	0.00987306	0.0183357	0.00705219	0.0296192	0.0253879	0.0211566	0.022567	0.0296192	0.022567	0.0423131	0.0324401	0.0352609	0.0267983	0.0465444	0.0296192	0.0507757
TCGA-CH-5761	0.00378072	0.00567108	0.0132325	0.00378072	0.00189036	0.00378072	0.0094518	0.00756144	0.00378072	0.00567108	0.0094518	0.00567108	0.0094518	0.00189036	0.00567108	0.00378072	0.00756144	0.00189036	0.00567108	0.0113422	0.0094518	0.00567108	0.00756144	0.00756144	0.0094518	0.00189036	0.00756144	0.0094518	0.0132325	0.0113422	0.00567108	0.0094518	0.0170132	0.00567108	0.0094518	0.0113422	0.020794	0.020794	0.0378072	0.0189036	0.0226843	0.0340265	0.0321361	0.0283554	0.0434783	0.0491493	0.0567108	0.0699433	0.0982987
TCGA-CH-5762	0.00438982	0.0158033	0.0175593	0.0219491	0.0114135	0.0140474	0.0122915	0.0140474	0.0158033	0.00790167	0.0149254	0.022827	0.0175593	0.0158033	0.0219491	0.0114135	0.0140474	0.0131694	0.0184372	0.0201932	0.0193152	0.0105356	0.022827	0.0140474	0.0272169	0.0149254	0.0140474	0.0166813	0.0201932	0.0175593	0.0175593	0.0166813	0.023705	0.0219491	0.0122915	0.0166813	0.0219491	0.0254609	0.022827	0.0210711	0.0254609	0.0280948	0.0333626	0.0289728	0.0351185	0.0333626	0.024583	0.0254609	0.0219491
TCGA-CH-5763	0.00264851	0.0045403	0.0045403	0.00302686	0.00529701	0.00378358	0.00529701	0.00605373	0.0071888	0.00491865	0.00643208	0.00340522	0.00567537	0.0045403	0.0071888	0.00302686	0.00643208	0.00491865	0.00567537	0.00491865	0.00794552	0.00832387	0.00908059	0.00567537	0.00945895	0.00643208	0.00832387	0.00416194	0.00605373	0.00908059	0.00832387	0.00756716	0.00908059	0.00908059	0.0121075	0.00832387	0.0132425	0.00832387	0.0139992	0.0071888	0.0143776	0.0124858	0.0132425	0.0151343	0.0208097	0.0204313	0.0238365	0.0249716	0.0461597
TCGA-CH-5764	0.003367	0.00505051	0.0117845	0.010101	0.013468	0.00841751	0.013468	0.00673401	0.00505051	0.010101	0.00505051	0.016835	0.00673401	0.00673401	0.013468	0.00841751	0.0151515	0.0151515	0.016835	0.003367	0.00505051	0.00841751	0.016835	0.00505051	0.013468	0.016835	0.013468	0.0151515	0.016835	0.016835	0.0151515	0.00841751	0.0117845	0.0151515	0.0117845	0.0218855	0.020202	0.00841751	0.016835	0.0185185	0.013468	0.020202	0.026936	0.026936	0.0387205	0.0387205	0.0319865	0.037037	0.0622896
TCGA-CH-5765	0.00212993	0.00745474	0.00532481	0.0085197	0.0127796	0.0085197	0.0106496	0.0106496	0.00532481	0.0106496	0.00958466	0.00319489	0.0117146	0.0106496	0.0127796	0.00745474	0.0127796	0.0127796	0.0191693	0.0106496	0.0117146	0.0127796	0.0106496	0.0117146	0.0138445	0.00958466	0.0149095	0.0159744	0.0191693	0.0191693	0.0149095	0.0170394	0.0212993	0.0117146	0.0266241	0.0159744	0.0266241	0.0255591	0.0415335	0.0244941	0.0234292	0.0394036	0.0319489	0.0415335	0.0468584	0.0415335	0.0394036	0.0404686	0.0457934
TCGA-CH-5766	0.00460829	0.00460829	0.00345622	0.00921659	0.00691244	0.00115207	0.0126728	0.00691244	0.00806452	0.00806452	0.00691244	0.00576037	0.00115207	0.00576037	0.00691244	0.00230415	0.00806452	0.00576037	0.00806452	0.00691244	0.0126728	0.00576037	0.016129	0.00806452	0.00806452	0.0138249	0.00576037	0.00576037	0.0115207	0.00921659	0.0115207	0.00460829	0.0115207	0.00921659	0.0126728	0.0103687	0.0115207	0.0115207	0.00921659	0.0126728	0.0241935	0.0172811	0.0276498	0.0172811	0.0276498	0.031106	0.0552995	0.0403226	0.0829493
TCGA-CH-5767	0.00366748	0.00733496	0.00122249	0.00244499	0.00488998	0.00122249	0.00611247	0.00366748	0.00244499	0.00244499	0.00366748	0.00733496	0.00488998	0.00244499	0	0.00366748	0.0110024	0.00611247	0.00733496	0	0.00366748	0.00733496	0.00366748	0.00855746	0.00733496	0.00733496	0.0110024	0.00855746	0.00366748	0.00366748	0.00855746	0.0134474	0.00977995	0.00977995	0.00611247	0.00733496	0.0122249	0.00855746	0.0122249	0.0158924	0.0268949	0.0281174	0.0171149	0.0256724	0.0366748	0.0293399	0.0611247	0.0696822	0.117359
TCGA-CH-5768	0.002	0.004	0.006	0.004	0	0.008	0.006	0.012	0.008	0.006	0.004	0.002	0.014	0.004	0.014	0.002	0.004	0.008	0.01	0.008	0.01	0.008	0.016	0.008	0.012	0.012	0.008	0.012	0.012	0.014	0.02	0.012	0.02	0.014	0.016	0.012	0.01	0.012	0.014	0.016	0.024	0.03	0.024	0.03	0.048	0.036	0.1	0.062	0.08
TCGA-CH-5769	0.00747065	0.0213447	0.0202775	0.0106724	0.0213447	0.0117396	0.0192102	0.0138741	0.0106724	0.0170758	0.0245464	0.0202775	0.0170758	0.0170758	0.0128068	0.0138741	0.0192102	0.0138741	0.0170758	0.0213447	0.0256137	0.0117396	0.022412	0.018143	0.0192102	0.00853789	0.0288154	0.0256137	0.0234792	0.0138741	0.0234792	0.0192102	0.0213447	0.022412	0.0245464	0.0192102	0.0288154	0.022412	0.0234792	0.0298826	0.0277481	0.0117396	0.0202775	0.022412	0.0288154	0.0138741	0.0277481	0.0320171	0.00853789
TCGA-EJ-5494	0.00357995	0.00596659	0.00596659	0.00596659	0.00387828	0.00835322	0.00686158	0.00447494	0.0071599	0.00775656	0.00656325	0.00865155	0.00745823	0.00626492	0.00894988	0.00984487	0.00865155	0.00865155	0.0140215	0.0071599	0.0107399	0.00835322	0.00775656	0.00924821	0.0071599	0.00686158	0.00954654	0.0128282	0.0125298	0.0116348	0.0146181	0.0107399	0.0143198	0.0149165	0.0184964	0.0143198	0.0173031	0.0170048	0.0220764	0.0193914	0.0256563	0.0214797	0.0283413	0.0241647	0.0319212	0.0292363	0.0411695	0.0360979	0.0522076
TCGA-EJ-5495	0.00498275	0.0107321	0.0103488	0.00958222	0.00919893	0.0099655	0.0114987	0.0099655	0.00804906	0.00728248	0.0134151	0.00804906	0.0099655	0.0103488	0.00766577	0.0126485	0.0103488	0.0122652	0.0134151	0.0107321	0.0137984	0.0099655	0.0114987	0.0107321	0.0153315	0.0141817	0.019931	0.00958222	0.0114987	0.0126485	0.019931	0.014565	0.019931	0.0141817	0.0187811	0.0122652	0.0122652	0.014565	0.019931	0.0249138	0.0187811	0.0187811	0.0245305	0.0229973	0.0298965	0.0279801	0.0379456	0.0256803	0.0417785
TCGA-EJ-5496	0.0012837	0.00353017	0.00513479	0.00192555	0.00481386	0.00513479	0.00417202	0.00353017	0.00449294	0.00385109	0.00513479	0.00481386	0.00609756	0.00545571	0.00481386	0.00513479	0.00449294	0.00353017	0.00513479	0.00385109	0.00577664	0.00609756	0.00609756	0.00577664	0.00770218	0.00545571	0.00994865	0.00898588	0.00706033	0.00898588	0.0131579	0.00898588	0.0118742	0.0102696	0.0147625	0.00994865	0.0160462	0.0131579	0.0179718	0.0157253	0.0247112	0.0234275	0.025353	0.0314506	0.0458922	0.0481386	0.0683569	0.0580873	0.084724
TCGA-EJ-5497	0.00189897	0.00303836	0.00322826	0.00284846	0.00417774	0.00417774	0.00379795	0.00474744	0.00607672	0.00341815	0.00379795	0.00379795	0.00284846	0.00341815	0.00436764	0.00512723	0.00531713	0.00379795	0.00493733	0.00455754	0.0072161	0.00607672	0.0077858	0.00550703	0.00626662	0.00607672	0.00854539	0.00683631	0.0077858	0.00645651	0.00816559	0.00930498	0.0121534	0.00873528	0.0119635	0.0123433	0.0180403	0.012913	0.0214584	0.0153817	0.0212685	0.01861	0.0300038	0.0224079	0.0338017	0.0326624	0.0571591	0.0457653	0.0801367
TCGA-EJ-5498	0.00175644	0.0029274	0.00526932	0.00253708	0.00312256	0.00273224	0.00409836	0.00214676	0.00273224	0.00273224	0.00331772	0.00273224	0.00351288	0.0029274	0.00351288	0.00429352	0.0029274	0.00253708	0.0029274	0.00429352	0.00448868	0.00370804	0.00370804	0.00370804	0.00644028	0.00312256	0.0068306	0.00526932	0.0058548	0.00565964	0.00741608	0.004879	0.00624512	0.00839188	0.0115144	0.00761124	0.0128806	0.0142467	0.0126854	0.0111241	0.0187354	0.018345	0.0216628	0.0197112	0.0267369	0.0284934	0.040203	0.0435207	0.0735753
TCGA-EJ-5499	0.00181736	0.00514917	0.00514917	0.00287748	0.00484628	0.00454339	0.00605785	0.0039376	0.00333182	0.00363471	0.00469484	0.00499773	0.00757232	0.00408905	0.00530062	0.00469484	0.0062093	0.0042405	0.00605785	0.00575496	0.00605785	0.00545207	0.00832955	0.00560351	0.00878389	0.00666364	0.00666364	0.00651219	0.00908678	0.00636075	0.0118128	0.00969256	0.0136302	0.00802665	0.018325	0.0148417	0.0163562	0.0159019	0.0222626	0.0139331	0.0233227	0.019688	0.0271089	0.0243829	0.0390731	0.0334696	0.0575496	0.0543692	0.0876874
TCGA-EJ-5501	0.00137315	0.00343289	0.00446275	0.00274631	0.00377618	0.00411946	0.00343289	0.0030896	0.00446275	0.00274631	0.00686577	0.00411946	0.00514933	0.00411946	0.00549262	0.00377618	0.00480604	0.00411946	0.00652249	0.00480604	0.00411946	0.00652249	0.00652249	0.00549262	0.00686577	0.00686577	0.00652249	0.00652249	0.00858222	0.0092688	0.00961208	0.0120151	0.0123584	0.0120151	0.0147614	0.0151047	0.0161346	0.0164779	0.0212839	0.0175077	0.0223138	0.0157913	0.0298661	0.0254034	0.0435977	0.0435977	0.053553	0.0545829	0.0937178
TCGA-EJ-5502	0.0017646	0.00370566	0.00405858	0.00405858	0.00441151	0.00458797	0.00317628	0.00282336	0.00247044	0.00211752	0.00370566	0.00423504	0.00317628	0.00282336	0.00405858	0.00282336	0.00388212	0.0035292	0.00335274	0.00299982	0.00335274	0.00441151	0.00582319	0.00370566	0.00423504	0.00511735	0.00811717	0.00335274	0.00882301	0.00723487	0.00670549	0.00617611	0.00635257	0.00899947	0.00864655	0.00952885	0.00899947	0.00829363	0.0155285	0.00847009	0.0144697	0.0165873	0.0224104	0.0151756	0.0321158	0.0298218	0.0485266	0.0554085	0.0942298
TCGA-EJ-5503	0.00433912	0.00534045	0.0046729	0.00200267	0.0046729	0.00200267	0.0046729	0.00534045	0.00267023	0.00400534	0.00267023	0.00233645	0.00400534	0.00267023	0.00400534	0.00233645	0.00300401	0.00400534	0.00500668	0.00433912	0.00333778	0.00534045	0.00200267	0.00367156	0.00600801	0.00500668	0.00500668	0.00367156	0.00801068	0.00534045	0.00834446	0.00834446	0.00567423	0.00834446	0.00901202	0.0076769	0.0113485	0.0100134	0.01502	0.0106809	0.0160214	0.0156876	0.0143525	0.021028	0.0300401	0.0337116	0.0393858	0.0504005	0.104139
TCGA-EJ-5504	0.00457367	0.0035936	0.00849396	0.00522705	0.00816727	0.00490036	0.00914734	0.00718719	0.00816727	0.00588043	0.00751388	0.00653381	0.00816727	0.00849396	0.00914734	0.00522705	0.00914734	0.00522705	0.00914734	0.00784057	0.0107808	0.00653381	0.0107808	0.00914734	0.0140477	0.0107808	0.0120876	0.00947403	0.0140477	0.00980072	0.0117609	0.0120876	0.0114342	0.0117609	0.0169879	0.013721	0.0205815	0.0147011	0.0241751	0.017968	0.0254819	0.0261352	0.0287488	0.0362627	0.0444299	0.0375694	0.0561908	0.0552107	0.0761189
TCGA-EJ-5505	0.000617284	0.00216049	0.00277778	0.00277778	0.00185185	0.00154321	0.00246914	0.00216049	0.00216049	0.00246914	0.00154321	0.00246914	0.00185185	0.00123457	0.00308642	0.00308642	0.00216049	0.00216049	0.00277778	0.00308642	0.00246914	0.00216049	0.0037037	0.00246914	0.00246914	0.0037037	0.00617284	0.00524691	0.00802469	0.00401235	0.00709877	0.00524691	0.00833333	0.00555556	0.00771605	0.00895062	0.0151235	0.00679012	0.0145062	0.0154321	0.0237654	0.017284	0.0333333	0.0280864	0.0364198	0.0398148	0.0626543	0.0737654	0.119136
TCGA-EJ-5506	0.0040521	0.00723589	0.00520984	0.00665702	0.00723589	0.00434153	0.00752533	0.00492041	0.00607815	0.00520984	0.0081042	0.00520984	0.00636758	0.00549928	0.00665702	0.00492041	0.00607815	0.00781476	0.0089725	0.00694645	0.00694645	0.00839363	0.011288	0.00636758	0.0138929	0.00723589	0.0115774	0.00723589	0.0089725	0.00868307	0.00955137	0.0101302	0.0141823	0.0109986	0.0127352	0.0109986	0.0136035	0.0124457	0.0188133	0.0167873	0.0234443	0.0214182	0.0263386	0.0231548	0.0327062	0.0335745	0.0474674	0.0489146	0.0714906
TCGA-EJ-5507	0.00248756	0.00359315	0.00552792	0.00276396	0.00359315	0.00359315	0.00580431	0.00304035	0.00276396	0.00469873	0.00414594	0.00580431	0.00718629	0.00469873	0.0063571	0.00248756	0.00359315	0.00525152	0.00608071	0.00469873	0.00939746	0.00552792	0.0063571	0.00442233	0.00801548	0.00718629	0.00746269	0.00525152	0.00442233	0.00580431	0.00801548	0.00884467	0.0102266	0.00856827	0.0113322	0.0116086	0.0140962	0.0129906	0.0190713	0.0157546	0.0226645	0.0185185	0.0345495	0.0281924	0.0472637	0.0403538	0.0710337	0.0726921	0.135987
TCGA-EJ-5508	0.000526593	0.00105319	0.00210637	0.000526593	0.00105319	0.00184308	0.000526593	0.000789889	0.00105319	0.00131648	0.00236967	0.000263296	0.000789889	0.000263296	0.00184308	0.000789889	0.00236967	0.00184308	0.00236967	0.00184308	0.00263296	0.00263296	0.00342285	0.00131648	0.00289626	0.00157978	0.00105319	0.00263296	0.00263296	0.00315956	0.00447604	0.00368615	0.00394945	0.00552923	0.007109	0.00421274	0.00605582	0.00895208	0.00947867	0.00658241	0.0110585	0.00974197	0.0184308	0.016851	0.0289626	0.0308057	0.0458136	0.0521327	0.108478
TCGA-EJ-5509	0.00101092	0.00505459	0.00384149	0.00323494	0.00505459	0.00343712	0.00525677	0.00444804	0.00323494	0.00384149	0.00465022	0.00384149	0.00707643	0.00444804	0.00545896	0.00384149	0.00465022	0.00444804	0.00465022	0.00444804	0.00525677	0.00465022	0.00727861	0.00525677	0.00505459	0.00444804	0.00727861	0.00525677	0.00828953	0.00545896	0.00707643	0.00788516	0.00748079	0.0105135	0.0105135	0.00566114	0.0119288	0.00849171	0.00808734	0.0113223	0.0161747	0.0117266	0.0194096	0.0179943	0.0240598	0.0254751	0.0347756	0.044076	0.0774363
TCGA-EJ-5510	0	0.000375375	0.00131381	0.00131381	0.000375375	0.000938438	0.000938438	0.00187688	0.000563063	0.000938438	0.000750751	0.000375375	0.0015015	0.000750751	0.000750751	0.00131381	0.000938438	0.000563063	0.00131381	0.00168919	0.00168919	0.00168919	0.00243994	0.00131381	0.00187688	0.00168919	0.00281532	0.00225225	0.00319069	0.00187688	0.00262763	0.00431682	0.0045045	0.00487988	0.00638138	0.00563063	0.00807057	0.00563063	0.0116366	0.0076952	0.0138889	0.0133258	0.0272147	0.0198949	0.0339715	0.0349099	0.0574324	0.0636261	0.123874
TCGA-EJ-5511	0.00178015	0.00578549	0.00801068	0.00445038	0.00712061	0.00534045	0.00756564	0.00801068	0.00445038	0.00489542	0.00756564	0.00445038	0.00801068	0.00667557	0.00934579	0.00845572	0.00623053	0.00934579	0.00890076	0.00623053	0.0106809	0.00712061	0.00979083	0.00979083	0.0133511	0.00534045	0.0102359	0.00979083	0.012016	0.0106809	0.0133511	0.0142412	0.0106809	0.0142412	0.0182466	0.0151313	0.0182466	0.0289275	0.0222519	0.023142	0.0284824	0.0244771	0.0293725	0.0329328	0.0396084	0.0387183	0.0534045	0.047174	0.0814419
TCGA-EJ-5512	0.00207407	0.00503704	0.00681481	0.00592593	0.00711111	0.00681481	0.00592593	0.008	0.00859259	0.00533333	0.00711111	0.00592593	0.00948148	0.00651852	0.0121481	0.00888889	0.0082963	0.00740741	0.0077037	0.00622222	0.00948148	0.00681481	0.00414815	0.00740741	0.010963	0.00918519	0.010963	0.0082963	0.0118519	0.013037	0.00977778	0.00711111	0.0151111	0.0118519	0.0174815	0.0171852	0.0183704	0.0180741	0.0171852	0.0139259	0.0219259	0.0231111	0.0308148	0.0257778	0.0331852	0.034963	0.0512593	0.0402963	0.0794074
TCGA-EJ-5514	0.00642949	0.00771539	0.00814402	0.00728676	0.00985855	0.0111444	0.00985855	0.00557222	0.0141449	0.00771539	0.0115731	0.00900129	0.00985855	0.00600086	0.0111444	0.0111444	0.00942992	0.0102872	0.00900129	0.00900129	0.0124303	0.00985855	0.0137162	0.0137162	0.0141449	0.0115731	0.0154308	0.0115731	0.0158594	0.0111444	0.0171453	0.0124303	0.0167167	0.016288	0.0175739	0.0154308	0.0197171	0.0141449	0.0188598	0.0184312	0.0248607	0.0214316	0.0227175	0.021003	0.0295757	0.0188598	0.0278611	0.0334333	0.037291
TCGA-EJ-5515	0.00122592	0.0028021	0.00315236	0.0028021	0.00227671	0.00297723	0.00210158	0.0033275	0.00367776	0.00245184	0.00385289	0.00350263	0.00262697	0.00402802	0.00472855	0.00367776	0.00367776	0.00350263	0.00437828	0.00315236	0.00542907	0.00262697	0.0056042	0.00437828	0.00595447	0.00542907	0.0056042	0.00490368	0.00665499	0.00402802	0.00788091	0.00542907	0.0061296	0.00525394	0.0089317	0.00735552	0.0103327	0.010683	0.0122592	0.0103327	0.0148862	0.0115587	0.0175131	0.0166375	0.0288967	0.0283713	0.0472855	0.0534151	0.091944
TCGA-EJ-5516	0.00251346	0.00251346	0.0032316	0.00359066	0.00143627	0.0032316	0.00502693	0.00179533	0.00179533	0.00610413	0.00143627	0.00287253	0.005386	0.00466786	0.00574506	0.0032316	0.00574506	0.00179533	0.00394973	0.0043088	0.00394973	0.00466786	0.00682226	0.005386	0.0043088	0.00394973	0.005386	0.005386	0.00789946	0.00861759	0.0064632	0.00718133	0.0129264	0.0100539	0.010772	0.00933573	0.0100539	0.0125673	0.0150808	0.0179533	0.0226212	0.0190305	0.0298025	0.0290844	0.0369838	0.0337522	0.0567325	0.0714542	0.117774
TCGA-EJ-5517	0.000804721	0.00214592	0.00402361	0.00241416	0.00295064	0.00348712	0.00321888	0.00456009	0.00241416	0.00563305	0.00429185	0.00321888	0.00429185	0.00402361	0.00321888	0.00241416	0.00321888	0.00321888	0.00563305	0.00563305	0.00536481	0.00429185	0.00724249	0.00831545	0.00804721	0.00563305	0.00509657	0.00429185	0.00616953	0.00831545	0.0101931	0.00831545	0.0109979	0.00777897	0.00992489	0.0142167	0.0131438	0.0128755	0.0160944	0.0190451	0.0219957	0.0209227	0.0284335	0.0249464	0.0402361	0.041309	0.0584764	0.0579399	0.103809
TCGA-EJ-5518	0.000828157	0.00331263	0.00331263	0.00289855	0.00207039	0.00207039	0.00455487	0.00289855	0.00248447	0.00124224	0.00207039	0.00455487	0.00207039	0.00372671	0.00289855	0.000828157	0.00455487	0.00248447	0.00414079	0.00414079	0.00372671	0.00248447	0.00289855	0.00331263	0.00414079	0.00331263	0.00703934	0.00455487	0.00455487	0.0057971	0.00828157	0.00331263	0.00621118	0.00745342	0.00621118	0.00745342	0.00455487	0.0057971	0.0057971	0.00910973	0.010352	0.0115942	0.0153209	0.0219462	0.0306418	0.0347826	0.0360248	0.0467909	0.0985507
TCGA-EJ-5519	0.00212565	0.00755786	0.00803023	0.00519603	0.00472367	0.00803023	0.00826641	0.00732168	0.00897496	0.0085026	0.00779405	0.00614077	0.0125177	0.00779405	0.0118092	0.00779405	0.00803023	0.0101559	0.0106282	0.0085026	0.00968351	0.0070855	0.0099197	0.0106282	0.0108644	0.0132263	0.0165328	0.011573	0.0172414	0.014171	0.0148795	0.0144072	0.0188947	0.0120453	0.0174776	0.0160605	0.0198394	0.016769	0.021965	0.0214927	0.0302315	0.0214927	0.0304676	0.0311762	0.0401512	0.0389702	0.051488	0.0493623	0.0793576
TCGA-EJ-5521	0.0029017	0.00362713	0.00652884	0.00435256	0.0054407	0.00435256	0.00580341	0.00580341	0.00471527	0.00507798	0.00906783	0.00362713	0.00761697	0.00725426	0.00616612	0.00507798	0.00689155	0.00943054	0.00943054	0.00870511	0.00906783	0.00943054	0.00652884	0.00725426	0.00797969	0.0105187	0.00725426	0.0083424	0.0083424	0.00652884	0.012695	0.00979325	0.0137831	0.0134204	0.0119695	0.012695	0.0130577	0.012695	0.0210374	0.0170475	0.0257526	0.0155967	0.0264781	0.0221255	0.0286543	0.0344577	0.0486036	0.0424374	0.0830613
TCGA-EJ-5522	0.00144838	0.00124146	0.0018622	0.00144838	0.00227602	0.00165529	0.00206911	0.00248293	0.00227602	0.00206911	0.00227602	0.00124146	0.0018622	0.00289675	0.00310366	0.00165529	0.00455204	0.00268984	0.00310366	0.00206911	0.00413822	0.00372439	0.00227602	0.00310366	0.00351748	0.00331057	0.00393131	0.00268984	0.00455204	0.00393131	0.00600041	0.00558659	0.0057935	0.00393131	0.00620732	0.00682806	0.00558659	0.0095179	0.00931099	0.0109663	0.0111732	0.0109663	0.0167598	0.0144838	0.018622	0.0227602	0.0339334	0.0413822	0.06497
TCGA-EJ-5524	0.00203459	0.00305188	0.00254323	0.0043235	0.00406918	0.00228891	0.00356053	0.00305188	0.00534079	0.00228891	0.00330621	0.00406918	0.00534079	0.00483215	0.00534079	0.00356053	0.00661241	0.00305188	0.0076297	0.00381485	0.00610376	0.00610376	0.00788403	0.00483215	0.00966429	0.00737538	0.00686673	0.00610376	0.0109359	0.0101729	0.00813835	0.0134791	0.0152594	0.00940997	0.0144964	0.0142421	0.0193286	0.0134791	0.0221261	0.0200916	0.025941	0.0246694	0.0391658	0.0307731	0.043235	0.0419634	0.0574771	0.051119	0.0890132
TCGA-EJ-5525	0.00147145	0.00588582	0.00676869	0.00353149	0.00618011	0.00676869	0.00412007	0.0064744	0.0064744	0.00470865	0.00529723	0.00353149	0.00559152	0.00441436	0.00706298	0.00618011	0.00882872	0.00529723	0.00824014	0.00559152	0.0094173	0.00676869	0.00882872	0.00618011	0.00794585	0.00853443	0.00765156	0.00882872	0.0103002	0.00882872	0.0147145	0.00853443	0.0164803	0.0100059	0.0129488	0.0138317	0.0226604	0.0188346	0.0244261	0.0309005	0.0300177	0.0258976	0.0447322	0.0403178	0.0497351	0.0417893	0.0641554	0.0609182	0.0794585
TCGA-EJ-5526	0.002143	0.00292227	0.00389636	0.00389636	0.00448081	0.00350672	0.00584454	0.00272745	0.00428599	0.0033119	0.00448081	0.00642899	0.00584454	0.0054549	0.00409117	0.00487045	0.00487045	0.00409117	0.00584454	0.00642899	0.00623417	0.00448081	0.00720826	0.00623417	0.00798753	0.00623417	0.00818235	0.00623417	0.00837717	0.00720826	0.0101305	0.00896162	0.00935126	0.00896162	0.0134424	0.00954607	0.0118839	0.0148062	0.0165595	0.0146113	0.0229885	0.019287	0.0268849	0.0253263	0.0383791	0.0432496	0.0594194	0.0767582	0.118449
TCGA-EJ-5527	0.00266565	0.0053313	0.0049505	0.00228484	0.00304646	0.00456969	0.00456969	0.00380807	0.00266565	0.00456969	0.0053313	0.00380807	0.00266565	0.00228484	0.0049505	0.0053313	0.00456969	0.0053313	0.00380807	0.00342727	0.00875857	0.00342727	0.00647372	0.00456969	0.00647372	0.00685453	0.00990099	0.00571211	0.00723534	0.00723534	0.00647372	0.00380807	0.0102818	0.0114242	0.0144707	0.00990099	0.0148515	0.0156131	0.0175171	0.0144707	0.0213252	0.0159939	0.0331302	0.0255141	0.0403656	0.0403656	0.0654989	0.0616908	0.104722
TCGA-EJ-5530	0.00279564	0.0030752	0.00782779	0.00223651	0.00587084	0.00642997	0.00726866	0.00391389	0.00475259	0.00559128	0.00447302	0.00419346	0.00754822	0.00754822	0.00726866	0.00531171	0.0069891	0.00642997	0.00810735	0.00642997	0.00531171	0.0069891	0.00754822	0.00503215	0.0069891	0.00531171	0.00950517	0.00754822	0.00978474	0.00726866	0.00754822	0.0069891	0.0142578	0.00670953	0.0156556	0.0123008	0.0170534	0.0128599	0.0192899	0.0145373	0.0206877	0.0195695	0.0243221	0.0229242	0.0369024	0.0243221	0.0492032	0.0438915	0.0863852
TCGA-EJ-5531	0.00314663	0.00629327	0.0094399	0.00566394	0.00503461	0.00440529	0.00503461	0.00440529	0.00566394	0.00566394	0.00566394	0.0100692	0.00377596	0.00377596	0.00629327	0.00692259	0.00818125	0.00692259	0.00188798	0.00818125	0.00440529	0.00755192	0.00692259	0.0113279	0.00629327	0.00377596	0.00629327	0.00692259	0.00692259	0.00818125	0.0138452	0.0100692	0.00755192	0.00881057	0.0113279	0.00818125	0.0163625	0.00818125	0.0100692	0.0138452	0.0195091	0.0188798	0.0188798	0.0144745	0.0213971	0.0245437	0.027061	0.0377596	0.0566394
TCGA-EJ-5532	0.00177423	0.00332668	0.00221779	0.00399202	0.00288312	0.00199601	0.00487913	0.00421379	0.00243957	0.00177423	0.00487913	0.00177423	0.00465735	0.00243957	0.00421379	0.00266134	0.00377024	0.00354846	0.0062098	0.00377024	0.00377024	0.00554447	0.00377024	0.00443557	0.0062098	0.00554447	0.0073187	0.00532269	0.00776225	0.00510091	0.00864937	0.00776225	0.00687514	0.00754047	0.00776225	0.00842759	0.011976	0.0130849	0.0161898	0.0113107	0.0199601	0.0166334	0.023065	0.0246174	0.033045	0.0308272	0.0527833	0.05611	0.0935906
TCGA-EJ-5542	0.00261267	0.00326584	0.00631396	0.00544307	0.00566079	0.00457218	0.00805574	0.00609623	0.00500762	0.0047899	0.0047899	0.00522534	0.00718485	0.00522534	0.00348356	0.00370128	0.00457218	0.00631396	0.00631396	0.00413673	0.0067494	0.00653168	0.00587851	0.0067494	0.0095798	0.00544307	0.0108861	0.00805574	0.010233	0.00936207	0.0104507	0.00936207	0.0119747	0.0106684	0.0132811	0.0124102	0.0185064	0.0174178	0.023514	0.0189419	0.023514	0.015676	0.0306989	0.0285217	0.0396255	0.0315698	0.0542129	0.0559547	0.0883954
TCGA-EJ-7115	0.000315657	0	0.000315657	0	0.000315657	0.000315657	0.000315657	0	0.000315657	0.00094697	0.000631313	0	0.000315657	0.000631313	0	0.000631313	0.00189394	0.00094697	0.0022096	0.000631313	0.000315657	0.00094697	0.00157828	0.000631313	0.000631313	0.00126263	0.00126263	0.000315657	0.00094697	0.00094697	0.00284091	0.000315657	0.0022096	0.000631313	0.00599747	0.00284091	0.00410354	0.00505051	0.0072601	0.00694444	0.00631313	0.00568182	0.0126263	0.0129419	0.0148359	0.0186237	0.0340909	0.0457702	0.0880682
TCGA-EJ-7123	0.00136674	0.00136674	0.00273349	0.00182232	0.00136674	0.00136674	0.00364465	0.00501139	0	0.00546697	0.00364465	0.00318907	0.00182232	0.0022779	0.00318907	0.00501139	0.00318907	0.00273349	0.00455581	0.00273349	0.00592255	0.00546697	0.00364465	0.00318907	0.00318907	0.00364465	0.00501139	0.00501139	0.00501139	0.00318907	0.00501139	0.00728929	0.00774487	0.00911162	0.00728929	0.00911162	0.00911162	0.0100228	0.0113895	0.0109339	0.0168565	0.0159453	0.0209567	0.0236902	0.0305239	0.0246014	0.0437358	0.0482916	0.0851936
TCGA-EJ-7314	0.00549268	0.00515979	0.00699068	0.00699068	0.00682423	0.00965379	0.00699068	0.00665779	0.00649134	0.00715712	0.00832224	0.00732357	0.00848868	0.00665779	0.00765646	0.00798935	0.00882157	0.00882157	0.00982024	0.00665779	0.010486	0.00798935	0.0108189	0.00815579	0.0126498	0.00749001	0.0131491	0.0103196	0.0126498	0.00699068	0.0131491	0.00765646	0.0138149	0.00865513	0.0136485	0.0129827	0.0106525	0.0139814	0.0156458	0.0136485	0.0178096	0.0184754	0.0234687	0.020972	0.0331225	0.0329561	0.046771	0.0476032	0.0822237
TCGA-EJ-7315	0.0015714	0.000982125	0.0031428	0.00255353	0.0031428	0.00216068	0.00294638	0.00333923	0.0031428	0.00216068	0.00333923	0.00274995	0.00373208	0.00294638	0.00373208	0.00255353	0.00274995	0.00353565	0.00274995	0.00137498	0.00333923	0.00412493	0.0023571	0.0031428	0.00491063	0.0047142	0.00432135	0.0047142	0.00687488	0.00412493	0.00883913	0.0070713	0.00982125	0.00726773	0.00923198	0.0102141	0.0139462	0.0102141	0.0178747	0.0137498	0.0214103	0.0186604	0.0276959	0.0273031	0.0473384	0.04066	0.0599096	0.0630524	0.114712
TCGA-EJ-7317	0.0005386	0.0010772	0.0016158	0.0010772	0.0010772	0.0010772	0.00125673	0.0010772	0.002693	0.000718133	0.0016158	0.0010772	0.0010772	0.00125673	0.00287253	0.0016158	0.00251346	0.00251346	0.00179533	0.00197487	0.0032316	0.0016158	0.00197487	0.00305206	0.00287253	0.00197487	0.00412926	0.00251346	0.0032316	0.00341113	0.0037702	0.002693	0.0059246	0.00233393	0.00466786	0.0048474	0.00843806	0.00610413	0.00933573	0.00718133	0.0143627	0.00897666	0.0159785	0.0174147	0.0262118	0.0258528	0.0443447	0.0554758	0.108438
TCGA-EJ-7321	0.00220143	0.00275179	0.00302697	0.000825537	0.00110072	0.00275179	0.0038525	0.00247661	0.00275179	0.00192625	0.00220143	0.00192625	0.00247661	0.00220143	0.00247661	0.00467804	0.0038525	0.00110072	0.00357733	0.00330215	0.00247661	0.00357733	0.0038525	0.00330215	0.0052284	0.00357733	0.00550358	0.00412768	0.0052284	0.00577876	0.00687947	0.00605394	0.00963126	0.00770501	0.0110072	0.00715465	0.0121079	0.00935608	0.0156852	0.0156852	0.0225647	0.0198129	0.0239406	0.0275179	0.0473308	0.0434783	0.0665933	0.0742983	0.136764
TCGA-EJ-7327	0.00217005	0.00217005	0.00453738	0.00236733	0.00394555	0.00315644	0.003551	0.00276189	0.00434011	0.00315644	0.00493194	0.00256461	0.00335372	0.003551	0.00453738	0.00118367	0.00512922	0.00315644	0.00394555	0.00374827	0.00453738	0.00315644	0.00493194	0.00394555	0.00591833	0.00512922	0.00591833	0.00414283	0.00532649	0.00335372	0.00690471	0.00651016	0.00572105	0.00512922	0.0108503	0.00749655	0.00868021	0.00868021	0.0134149	0.00946932	0.0151904	0.0136122	0.0191359	0.0193332	0.0311699	0.0327481	0.0503058	0.0570132	0.103176
TCGA-EJ-7328	0.00197239	0.00236686	0.00433925	0.0035503	0.00552268	0.00473373	0.00710059	0.00315582	0.00749507	0.00394477	0.00512821	0.00512821	0.00907298	0.0035503	0.00591716	0.00591716	0.00433925	0.00512821	0.0106509	0.00315582	0.0106509	0.00986193	0.00710059	0.00749507	0.00788955	0.00591716	0.00828402	0.0086785	0.0126233	0.0114398	0.0118343	0.0106509	0.0110454	0.0086785	0.0138067	0.0161736	0.0205128	0.0161736	0.0224852	0.0205128	0.0240631	0.0232742	0.0323471	0.0295858	0.0422091	0.0485207	0.0619329	0.0733728	0.101381
TCGA-EJ-7330	0.00147866	0.00422476	0.00380228	0.00337981	0.00422476	0.00316857	0.00464723	0.00401352	0.00401352	0.00274609	0.00232362	0.00443599	0.00337981	0.00316857	0.00274609	0.00359104	0.00401352	0.00253485	0.00528095	0.00464723	0.00506971	0.00380228	0.00591466	0.00464723	0.00422476	0.00443599	0.00654837	0.00506971	0.00633714	0.0061259	0.0078158	0.00633714	0.00739332	0.00802704	0.0111956	0.00971694	0.0152091	0.0152091	0.0156316	0.0145754	0.0211238	0.0202788	0.0289396	0.0291508	0.0386565	0.039079	0.0633714	0.0623152	0.0956907
TCGA-EJ-7331	0.00191518	0.00273598	0.00383037	0.00273598	0.00300958	0.00300958	0.00492476	0.00355677	0.00300958	0.00273598	0.000820793	0.00273598	0.00246238	0.00383037	0.00246238	0.00246238	0.00328317	0.00437756	0.00273598	0.00492476	0.00437756	0.00410397	0.00547196	0.00492476	0.00629275	0.00656635	0.00766074	0.00410397	0.00629275	0.00629275	0.00820793	0.00601915	0.0103967	0.00547196	0.0109439	0.00766074	0.0109439	0.00984952	0.0123119	0.0161423	0.0166895	0.0188782	0.0257182	0.025171	0.0372093	0.0317373	0.054446	0.0708618	0.126129
TCGA-EJ-7782	0.00131268	0.00236282	0.00262536	0.00157522	0.00105014	0.00341297	0.00315043	0.00183775	0.00157522	0.00131268	0.00183775	0.00262536	0.0028879	0.00183775	0.00341297	0.00157522	0.00420058	0.00210029	0.0028879	0.00183775	0.00315043	0.00262536	0.00315043	0.00131268	0.00315043	0.00420058	0.00367551	0.00472565	0.00472565	0.0028879	0.00525072	0.00630087	0.00472565	0.00525072	0.00866369	0.00971384	0.00971384	0.00866369	0.00971384	0.00892623	0.0120767	0.0157522	0.025466	0.0246784	0.0385928	0.0370176	0.0577579	0.0706222	0.135731
TCGA-EJ-7783	0.00169384	0.00296422	0.00190557	0.00296422	0.00381114	0.00296422	0.00592844	0.00338768	0.0042346	0.00275249	0.00402287	0.00381114	0.00402287	0.00465806	0.0042346	0.00275249	0.00338768	0.00486979	0.00486979	0.00444633	0.00592844	0.00296422	0.00381114	0.00359941	0.00592844	0.0042346	0.00571671	0.00444633	0.00868092	0.00444633	0.00698708	0.00486979	0.00846919	0.00804573	0.010163	0.00910438	0.00846919	0.00846919	0.0148211	0.00889265	0.0177853	0.0131272	0.0218082	0.0194791	0.0296422	0.0249841	0.0486979	0.0499682	0.0923142
TCGA-EJ-7784	0.000701459	0.000841751	0.000561167	0.000561167	0.000982043	0.000701459	0.000561167	0.00112233	0.00182379	0.00154321	0.000561167	0.00112233	0.00224467	0.00154321	0.00126263	0.000841751	0.00126263	0.000982043	0.00210438	0.000701459	0.00154321	0.00154321	0.00126263	0.00196409	0.00280584	0.00224467	0.00182379	0.00196409	0.00294613	0.00196409	0.00294613	0.00322671	0.003367	0.00308642	0.00434905	0.00266554	0.00476992	0.00547138	0.00603255	0.00743547	0.0105219	0.00729517	0.0133277	0.0112233	0.0169753	0.0217452	0.0325477	0.0363356	0.0662177
TCGA-EJ-7785	0.00167866	0.00239808	0.00215827	0.00239808	0.00263789	0.00359712	0.00215827	0.0028777	0.00263789	0.00239808	0.00191847	0.00407674	0.00311751	0.00311751	0.00143885	0.00311751	0.00239808	0.00215827	0.00407674	0.00215827	0.00335731	0.0028777	0.00503597	0.0028777	0.00263789	0.00503597	0.00743405	0.0028777	0.00647482	0.00359712	0.00551559	0.00551559	0.00503597	0.0057554	0.00815348	0.0088729	0.0088729	0.0122302	0.0139089	0.0107914	0.0182254	0.0158273	0.023741	0.022542	0.0306954	0.0330935	0.0565947	0.0635492	0.12518
TCGA-EJ-7786	0.000469925	0.00140977	0.00234962	0.00093985	0.00140977	0.00164474	0.00281955	0.00117481	0.00234962	0.00281955	0.00258459	0.0018797	0.00305451	0.00281955	0.00258459	0.00140977	0.00352444	0.00305451	0.00281955	0.0037594	0.00493421	0.00234962	0.00352444	0.00164474	0.00281955	0.00328947	0.00587406	0.00422932	0.00422932	0.0037594	0.00540414	0.00540414	0.00728383	0.00681391	0.00704887	0.00822368	0.0133929	0.00704887	0.0133929	0.00986842	0.018797	0.018562	0.0263158	0.024906	0.0401786	0.0361842	0.0653195	0.0697838	0.117951
TCGA-EJ-7788	0.0023825	0.00584795	0.00584795	0.0071475	0.00519818	0.00606454	0.00563136	0.00519818	0.0071475	0.00584795	0.00433182	0.00433182	0.00433182	0.00368204	0.00584795	0.00606454	0.00671432	0.00519818	0.00606454	0.00693091	0.00736409	0.00649773	0.00606454	0.00584795	0.00974659	0.00779727	0.00909682	0.00909682	0.0108295	0.00671432	0.0103964	0.0110461	0.0168941	0.0112627	0.0171107	0.0129955	0.015378	0.0162443	0.0203595	0.0205761	0.027507	0.0236084	0.0348711	0.0314057	0.0485164	0.0446177	0.0708252	0.0781893	0.12324
TCGA-EJ-7789	0.00212653	0.00292398	0.00372142	0.00212653	0.00239234	0.00372142	0.00372142	0.00239234	0.00345561	0.00212653	0.00398724	0.00265816	0.00531632	0.00451887	0.00451887	0.00318979	0.00292398	0.00318979	0.00398724	0.00478469	0.00611377	0.00372142	0.00611377	0.00505051	0.00478469	0.00425306	0.00558214	0.00505051	0.00691122	0.00292398	0.00611377	0.00558214	0.0082403	0.00637959	0.00877193	0.00717703	0.0127592	0.0108985	0.0183413	0.0170122	0.0252525	0.0204678	0.0287081	0.0305688	0.0473153	0.0454545	0.073631	0.0712387	0.124934
TCGA-EJ-7791	0.00362231	0.0038638	0.00482975	0.00410529	0.0038638	0.0057957	0.00265636	0.00241488	0.00265636	0.00338083	0.00362231	0.00265636	0.00410529	0.0038638	0.00603719	0.00555421	0.00555421	0.00289785	0.00555421	0.00362231	0.00507124	0.00313934	0.00700314	0.00603719	0.00627868	0.00676165	0.00796909	0.00748611	0.00748611	0.00748611	0.0113499	0.00917653	0.00917653	0.010384	0.0108669	0.0132818	0.0144893	0.0164212	0.0212509	0.0166626	0.0236658	0.0200435	0.0345327	0.0268051	0.0446752	0.0427433	0.0690654	0.0731707	0.114465
TCGA-EJ-7792	0.00150678	0.00226017	0.00452034	0.00351582	0.00477147	0.00276243	0.0025113	0.00276243	0.00175791	0.00301356	0.00477147	0.00226017	0.00401808	0.00276243	0.00376695	0.00376695	0.00301356	0.00226017	0.00351582	0.00477147	0.0050226	0.00226017	0.00426921	0.00602712	0.00627825	0.00552486	0.00778503	0.00351582	0.00678051	0.00477147	0.00828729	0.00878955	0.0105475	0.00828729	0.00904068	0.0113009	0.0120542	0.0120542	0.0163235	0.0150678	0.0213461	0.0168257	0.0258664	0.0258664	0.0349071	0.038674	0.053993	0.0577599	0.101457
TCGA-EJ-7793	0.00124669	0.00109085	0.000935016	0.000623344	0.00140252	0.00155836	0.0021817	0.00187003	0.00233754	0.00187003	0.0021817	0.00187003	0.00155836	0.00187003	0.00187003	0.00155836	0.00264921	0.0021817	0.00155836	0.00124669	0.00233754	0.00187003	0.0017142	0.00296089	0.00155836	0.00264921	0.00374007	0.00405174	0.00405174	0.00358423	0.00405174	0.0038959	0.0038959	0.00405174	0.00701262	0.00592177	0.00794764	0.00670095	0.010441	0.0077918	0.0124669	0.0129344	0.0174536	0.0158953	0.0258688	0.0233754	0.0417641	0.0430108	0.0707496
TCGA-EJ-7794	0.000924499	0.00123267	0.0027735	0.001849	0.00246533	0.0046225	0.0027735	0.00246533	0.00154083	0.00154083	0.00338983	0.00246533	0.00154083	0.00215716	0.00215716	0.00246533	0.0046225	0.00523883	0.0027735	0.00215716	0.00246533	0.003698	0.00523883	0.0046225	0.00647149	0.003698	0.00431433	0.00647149	0.00677966	0.00431433	0.00677966	0.00862866	0.0101695	0.00955316	0.0132512	0.00708783	0.0104777	0.011094	0.0141757	0.0114022	0.022188	0.0194145	0.029584	0.0271186	0.0382126	0.0431433	0.05547	0.0702619	0.106626
TCGA-EJ-7797	0.00332594	0.00609756	0.00637472	0.00498891	0.00859202	0.00748337	0.00803769	0.00859202	0.0058204	0.00692905	0.00859202	0.00720621	0.00831486	0.00803769	0.0110865	0.00609756	0.00748337	0.00720621	0.00970067	0.00914634	0.00831486	0.00748337	0.0094235	0.00886918	0.0116408	0.00970067	0.0113636	0.00803769	0.0124723	0.0113636	0.0124723	0.0149667	0.0157982	0.0144124	0.0213415	0.0121951	0.0213415	0.0174612	0.0238359	0.0221729	0.0266075	0.0243902	0.0388027	0.0340909	0.0401885	0.0407428	0.0609756	0.0576497	0.0864745
TCGA-EJ-A46B	0.0018423	0.00294768	0.00534267	0.0055269	0.00497421	0.00478998	0.00571113	0.00497421	0.00497421	0.00350037	0.00607959	0.00331614	0.00405306	0.00386883	0.00405306	0.00423729	0.00534267	0.00442152	0.00497421	0.00663228	0.00644805	0.00497421	0.00460575	0.00571113	0.00718497	0.00663228	0.00792189	0.00663228	0.00626382	0.00589536	0.00755343	0.00829035	0.0092115	0.0092115	0.00829035	0.0101326	0.0117907	0.0149226	0.013633	0.0163965	0.0198968	0.0217391	0.0274503	0.0237657	0.0351879	0.0381356	0.0532424	0.0598747	0.093773
TCGA-EJ-A46D	0.00214938	0.00429876	0.00322407	0.0059108	0.00322407	0.00644815	0.0059108	0.00376142	0.00268673	0.00698549	0.00537346	0.00214938	0.00537346	0.00322407	0.00698549	0.00483611	0.00913487	0.00698549	0.0107469	0.00429876	0.0118216	0.00537346	0.00752284	0.00698549	0.00429876	0.0059108	0.0107469	0.00913487	0.0118216	0.00967222	0.0112843	0.00913487	0.0118216	0.00913487	0.0128963	0.0102096	0.0171951	0.0128963	0.0193444	0.0145083	0.0236432	0.0257926	0.027942	0.0247179	0.0408383	0.0322407	0.0553466	0.0612574	0.112305
TCGA-EJ-A46E	0.00215827	0.00455635	0.00527578	0.00359712	0.00311751	0.00215827	0.00263789	0.00167866	0.0028777	0.00407674	0.00383693	0.00167866	0.00479616	0.00263789	0.00383693	0.00263789	0.00239808	0.00311751	0.00359712	0.00431655	0.00503597	0.00551559	0.00479616	0.00503597	0.00551559	0.00503597	0.00551559	0.00503597	0.00527578	0.0059952	0.00623501	0.00479616	0.0088729	0.00623501	0.0107914	0.00647482	0.0122302	0.00815348	0.0158273	0.0136691	0.0177458	0.0165468	0.0263789	0.018705	0.0338129	0.0263789	0.0551559	0.0489209	0.106715
TCGA-EJ-A46F	0	0	0.000668896	0.00200669	0.000668896	0.00133779	0.000668896	0.00133779	0.00200669	0	0	0.00133779	0.000668896	0	0.00133779	0.000668896	0	0.00200669	0.00267559	0	0.000668896	0.00200669	0.00133779	0	0.00267559	0.000668896	0.000668896	0	0.00200669	0.000668896	0.00200669	0	0.00133779	0.00334448	0	0.00200669	0.000668896	0.00200669	0.00334448	0.00267559	0.00334448	0.00200669	0.0100334	0.0107023	0.0180602	0.0120401	0.0247492	0.0374582	0.09699
TCGA-EJ-A46G	0.000627746	0.00188324	0.00408035	0.00219711	0.00188324	0.000627746	0.00251099	0.00188324	0.00219711	0.00094162	0.00188324	0.00156937	0.00251099	0.00251099	0.00125549	0.00125549	0.00251099	0.00313873	0.00156937	0.00251099	0.00251099	0.00345261	0.00282486	0.00282486	0.00313873	0.00156937	0.00533584	0.00345261	0.00219711	0.00408035	0.00408035	0.00439422	0.00439422	0.00564972	0.00564972	0.00376648	0.00847458	0.00659134	0.0116133	0.0112994	0.0112994	0.0112994	0.0153798	0.0188324	0.022285	0.0313873	0.0398619	0.04457	0.0875706
TCGA-EJ-A46H	0.00242836	0.00752793	0.00874211	0.00582807	0.00655658	0.00655658	0.00898494	0.00509956	0.00461389	0.00558524	0.00607091	0.00509956	0.00752793	0.00607091	0.0080136	0.00509956	0.00874211	0.00485673	0.00607091	0.00777076	0.0106848	0.00704225	0.00777076	0.00655658	0.00631374	0.0109276	0.0111705	0.00631374	0.0109276	0.0106848	0.0126275	0.0116561	0.0138417	0.0135988	0.0191841	0.0135988	0.0189412	0.0182127	0.0196697	0.0174842	0.0269548	0.025255	0.0315687	0.0259835	0.0405537	0.0369111	0.0524526	0.0490529	0.0699369
TCGA-EJ-A46I	0.0020337	0.0040674	0.00493899	0.00290529	0.00319582	0.0040674	0.00668216	0.00493899	0.00435793	0.0040674	0.00639163	0.00581058	0.00755375	0.00493899	0.00639163	0.00522952	0.00755375	0.00522952	0.00581058	0.0061011	0.0107496	0.00668216	0.00784428	0.00639163	0.00784428	0.00813481	0.00958745	0.00581058	0.0107496	0.00552005	0.00900639	0.00813481	0.0145264	0.00784428	0.0139454	0.00958745	0.0110401	0.0107496	0.0122022	0.015398	0.0171412	0.0171412	0.0217897	0.0200465	0.0281813	0.0290529	0.0371877	0.0339919	0.0618826
TCGA-FC-7708	0.0017192	0.00458453	0.00286533	0.00401146	0.0017192	0.00458453	0.0034384	0.00515759	0.00286533	0.00401146	0.00286533	0.00401146	0.00401146	0.00401146	0.00458453	0.00515759	0.00630372	0.00573066	0.00573066	0.00286533	0.00687679	0.00229226	0.00515759	0.00458453	0.00573066	0.0034384	0.00744986	0.00401146	0.00974212	0.00286533	0.00630372	0.00744986	0.0103152	0.00859599	0.0126074	0.00687679	0.0114613	0.0166189	0.0137536	0.017192	0.0189112	0.0148997	0.0280802	0.0206304	0.0355301	0.034957	0.0481375	0.0567335	0.112321
TCGA-FC-7961	0.0030303	0.0020202	0.00353535	0.00151515	0.0040404	0.0020202	0.00454545	0.0040404	0.0040404	0.00353535	0.00757576	0.00252525	0.0020202	0.00252525	0.00353535	0.0030303	0.00252525	0.0030303	0.00505051	0.0010101	0.00505051	0.00252525	0.00353535	0.0030303	0.00505051	0.0040404	0.00555556	0.00353535	0.00454545	0.0040404	0.00505051	0.0040404	0.0040404	0.00454545	0.00555556	0.00757576	0.00707071	0.00505051	0.0116162	0.00858586	0.0116162	0.0131313	0.0121212	0.0126263	0.0151515	0.0237374	0.0338384	0.029798	0.0636364
TCGA-FC-A4JI	0.00654762	0.0107143	0.0125	0.0125	0.00892857	0.0077381	0.014881	0.010119	0.010119	0.0130952	0.0154762	0.00714286	0.0136905	0.0119048	0.0136905	0.0107143	0.0178571	0.0130952	0.0107143	0.00654762	0.0184524	0.014881	0.0190476	0.0113095	0.0136905	0.00892857	0.0166667	0.0160714	0.0214286	0.0130952	0.0214286	0.0136905	0.0220238	0.0119048	0.025	0.0208333	0.0202381	0.0184524	0.0232143	0.0255952	0.0285714	0.0267857	0.0357143	0.0255952	0.0375	0.0309524	0.0434524	0.0428571	0.0565476
TCGA-FC-A5OB	0.00367197	0.00448796	0.00734394	0.00530396	0.00367197	0.00407997	0.00407997	0.00407997	0.00693594	0.00489596	0.00448796	0.00326397	0.00693594	0.00367197	0.00326397	0.00448796	0.00611995	0.00530396	0.00652795	0.00326397	0.00611995	0.00611995	0.00652795	0.00367197	0.00611995	0.00571195	0.00938392	0.00489596	0.00734394	0.00693594	0.00489596	0.00815993	0.00979192	0.00979192	0.00775194	0.0101999	0.0110159	0.00734394	0.0155039	0.0150959	0.0208078	0.0138719	0.0240718	0.0248878	0.0310078	0.0277438	0.0522236	0.0591595	0.109751
TCGA-FC-A66V	0.00160514	0.00267523	0.00535045	0.00481541	0.00481541	0.00321027	0.00374532	0.00321027	0.00267523	0.00481541	0.00481541	0.0058855	0.0058855	0.00481541	0.00374532	0.00642055	0.00481541	0.00535045	0.00321027	0.00963082	0.00481541	0.00321027	0.00535045	0.00802568	0.00535045	0.0058855	0.0133761	0.00267523	0.0058855	0.00749064	0.00802568	0.0058855	0.0144462	0.0128411	0.011236	0.012306	0.0171215	0.012306	0.0214018	0.0176565	0.0246121	0.0262172	0.0294275	0.0304976	0.0369181	0.0417335	0.0497592	0.0674157	0.105404
TCGA-FC-A6HD	0.00125786	0.00251572	0.00377358	0.00377358	0.00125786	0.00503145	0.00503145	0.00251572	0.00503145	0.00377358	0.00503145	0	0.00377358	0.00251572	0.0150943	0.00754717	0.00251572	0.0113208	0.00628931	0.0100629	0.00754717	0.00503145	0.00503145	0.00880503	0.0100629	0.00251572	0.00125786	0.00377358	0.00503145	0.00377358	0.00377358	0.0100629	0.00880503	0.0100629	0.0113208	0.00251572	0.0163522	0.0113208	0.0125786	0.0113208	0.0125786	0.00754717	0.0251572	0.0289308	0.0238994	0.0289308	0.0503145	0.0528302	0.120755
TCGA-FC-A8O0	0.00199601	0.00499002	0.00316035	0.00232868	0.00449102	0.00648703	0.00382568	0.00415835	0.00399202	0.00316035	0.00365935	0.00415835	0.00415835	0.00365935	0.00316035	0.00365935	0.00582169	0.00415835	0.00598802	0.00548902	0.00632069	0.00449102	0.00615436	0.00715236	0.00632069	0.00615436	0.0073187	0.00582169	0.00548902	0.00598802	0.00765136	0.00765136	0.00948104	0.00532269	0.0118097	0.010479	0.00948104	0.0121424	0.0158017	0.011477	0.0151364	0.0156354	0.0219561	0.0196274	0.0289421	0.0287758	0.0404192	0.0397538	0.0645376
TCGA-G9-6329	0.000375516	0.00375516	0.00394292	0.00150207	0.00375516	0.00281637	0.00375516	0.00281637	0.00469395	0.00281637	0.00544499	0.00206534	0.00244086	0.00356741	0.0045062	0.00375516	0.00506947	0.00488171	0.00506947	0.00375516	0.00600826	0.00300413	0.00600826	0.00563275	0.00638378	0.00469395	0.00901239	0.00431844	0.00788584	0.00844912	0.00863688	0.00826136	0.00976342	0.00675929	0.0110777	0.00957567	0.0135186	0.0122043	0.0159594	0.0152084	0.0245963	0.0191513	0.027976	0.0300413	0.0336087	0.0360496	0.0585805	0.0583928	0.101953
TCGA-G9-6332	0.00161394	0.00129116	0.00129116	0.00274371	0.00112976	0.00225952	0.00242092	0.00225952	0.00258231	0.0029051	0.00258231	0.00129116	0.00209813	0.00129116	0.00242092	0.00209813	0.00225952	0.00355068	0.00274371	0.00338928	0.00112976	0.00193673	0.00225952	0.00274371	0.00306649	0.00274371	0.0029051	0.00274371	0.00435765	0.00468044	0.00435765	0.00564881	0.00451904	0.00500323	0.00629438	0.00629438	0.00790833	0.00823112	0.00839251	0.00903809	0.0103292	0.0101679	0.0159781	0.0192059	0.022918	0.0214655	0.0348612	0.0416398	0.071175
TCGA-G9-6333	0.000783239	0.00117486	0.00215391	0.0019581	0.00254553	0.00293715	0.00254553	0.00176229	0.00215391	0.0019581	0.00176229	0.00215391	0.00332876	0.00234972	0.00254553	0.0019581	0.00254553	0.00332876	0.00313295	0.00332876	0.00293715	0.00372038	0.00313295	0.0019581	0.00567848	0.00274134	0.00352457	0.00469943	0.00763658	0.00430781	0.0060701	0.0060701	0.00900724	0.00450362	0.00861563	0.00900724	0.0107695	0.0105737	0.0146857	0.0117486	0.0144899	0.016448	0.0262385	0.0270217	0.0330918	0.0356374	0.0693166	0.0712747	0.132172
TCGA-G9-6336	0.00170604	0.00262467	0.00288714	0.0019685	0.0023622	0.00223097	0.00314961	0.00328084	0.0015748	0.00301837	0.00223097	0.00223097	0.00341207	0.0019685	0.00393701	0.00367454	0.00406824	0.00209974	0.00446194	0.00301837	0.00446194	0.00354331	0.00446194	0.00406824	0.00446194	0.00419948	0.00524934	0.00485564	0.00616798	0.00538058	0.00734908	0.00564304	0.00682415	0.00734908	0.00800525	0.00774278	0.0119423	0.010105	0.014042	0.00944882	0.0158793	0.0190289	0.0253281	0.023622	0.0329396	0.0335958	0.0560367	0.0602362	0.104987
TCGA-G9-6338	0.00954462	0.0160994	0.0175943	0.0182843	0.0167893	0.0164443	0.0174793	0.0178243	0.0160994	0.0148344	0.0212741	0.0156394	0.0185143	0.0148344	0.0175943	0.0137994	0.0179393	0.0135695	0.0162144	0.0146044	0.0163293	0.0144894	0.0157544	0.0143744	0.0173643	0.0125345	0.0134545	0.0132245	0.0190892	0.0128795	0.0143744	0.0120745	0.0124195	0.0124195	0.0149494	0.00977461	0.0150644	0.0103496	0.0126495	0.0121895	0.0135695	0.0109246	0.0118445	0.0121895	0.0162144	0.0186293	0.0231141	0.0218491	0.0464581
TCGA-G9-6339	0.00373289	0.00373289	0.00539195	0.00580672	0.00290336	0.00497719	0.00539195	0.00331813	0.00788055	0.00497719	0.00705102	0.00622148	0.00331813	0.00248859	0.00663625	0.00290336	0.00580672	0.00746578	0.00788055	0.00290336	0.00414766	0.00622148	0.00871008	0.00248859	0.00746578	0.00207383	0.00871008	0.00580672	0.00871008	0.00912484	0.00829531	0.00456242	0.00622148	0.00705102	0.00788055	0.00705102	0.0157611	0.012443	0.0111987	0.0136873	0.0186645	0.0165906	0.0215678	0.0149316	0.0311074	0.0269598	0.0547491	0.0452095	0.0999585
TCGA-G9-6342	0.000622278	0.00124456	0.00207426	0.00207426	0.00165941	0.00124456	0.00290396	0.00124456	0.00145198	0.00124456	0.00165941	0.00269654	0.00165941	0.00186683	0.00228168	0.00145198	0.00207426	0.00124456	0.00331881	0.00186683	0.00186683	0.00165941	0.00311139	0.00248911	0.00248911	0.00186683	0.00373367	0.00373367	0.00456337	0.00186683	0.00497822	0.00352624	0.00622278	0.00394109	0.00601535	0.00601535	0.00663763	0.00767476	0.00829703	0.00767476	0.011201	0.0136901	0.0155569	0.0147272	0.0211574	0.0265505	0.0398258	0.0528936	0.100602
TCGA-G9-6343	0.00141593	0.00283186	0.00318584	0.00283186	0.00389381	0.00212389	0.00318584	0.00176991	0.00318584	0.00283186	0.00424779	0.00424779	0.00353982	0.00176991	0.00212389	0.00318584	0.00141593	0.00247788	0.00353982	0.00212389	0.00389381	0.00247788	0.00247788	0.00460177	0.00460177	0.00353982	0.00530973	0.00495575	0.00530973	0.00566372	0.00495575	0.00672566	0.0060177	0.00530973	0.00672566	0.0060177	0.0113274	0.00920354	0.0116814	0.0099115	0.0134513	0.0169912	0.0152212	0.0148673	0.0272566	0.0261947	0.039292	0.0484956	0.0835398
TCGA-G9-6347	0.000674536	0.000505902	0.00185497	0.00185497	0.00185497	0.00151771	0.00219224	0.00202361	0.00185497	0.00118044	0.00134907	0.00084317	0.00219224	0.0010118	0.00185497	0.000674536	0.00185497	0.00219224	0.00269815	0.00168634	0.00151771	0.00151771	0.00202361	0.00252951	0.00286678	0.00269815	0.00252951	0.00303541	0.00370995	0.00269815	0.00404722	0.00404722	0.00472175	0.00421585	0.00607083	0.00640809	0.00725126	0.00556492	0.00775717	0.00826307	0.0121417	0.0109612	0.0182125	0.0177066	0.0268128	0.0242833	0.0460371	0.0551433	0.10253
TCGA-G9-6348	0.00107273	0.00171637	0.00386183	0.00193092	0.00343274	0.00214546	0.00171637	0.00364729	0.00300365	0.0027891	0.00128728	0.00257455	0.00343274	0.00407638	0.00321819	0.00257455	0.00386183	0.00514911	0.00386183	0.00364729	0.00600729	0.00472002	0.0055782	0.00386183	0.00536366	0.00386183	0.00579275	0.00321819	0.00600729	0.00429092	0.00429092	0.00643639	0.00815276	0.00815276	0.0100837	0.00729457	0.00922549	0.00858185	0.0111564	0.0118	0.0150182	0.0199528	0.0227419	0.0199528	0.0311092	0.0336838	0.0489165	0.0549238	0.101051
TCGA-G9-6351	0.00105708	0.00132135	0.00105708	0.00184989	0.00132135	0.00132135	0.00317125	0.00211416	0.00237844	0.00158562	0.00290698	0.00158562	0.00290698	0.00211416	0.00396406	0.00396406	0.00343552	0.00343552	0.00396406	0.00343552	0.00528541	0.00343552	0.00343552	0.00317125	0.0044926	0.00396406	0.00554968	0.00502114	0.00739958	0.00607822	0.00924947	0.00924947	0.0134778	0.0110994	0.0145349	0.0100423	0.0134778	0.0105708	0.0147992	0.0182347	0.0219345	0.0158562	0.0303911	0.0256342	0.0383192	0.0362051	0.0591966	0.0552326	0.10333
TCGA-G9-6353	0.000767263	0.00102302	0.00289855	0.00204604	0.00144928	0.00238704	0.00230179	0.00187553	0.00179028	0.00230179	0.00196078	0.00204604	0.00153453	0.00127877	0.00289855	0.00332481	0.00306905	0.00127877	0.00213129	0.00161978	0.00255754	0.0026428	0.00255754	0.00289855	0.00255754	0.0028133	0.00272805	0.0028133	0.00341006	0.0026428	0.00434783	0.00238704	0.00417732	0.00417732	0.00400682	0.00392157	0.0059676	0.00323956	0.0057971	0.00460358	0.00682012	0.0057971	0.00920716	0.00826939	0.0127025	0.0110827	0.0189258	0.0204604	0.0409207
TCGA-G9-6354	0.00132001	0.00188573	0.00320573	0.00150858	0.00264002	0.00113144	0.00150858	0.00245144	0.00132001	0.000942863	0.00282859	0.00282859	0.00226287	0.00188573	0.00264002	0.00245144	0.00245144	0.00188573	0.00282859	0.0020743	0.00452574	0.00264002	0.00264002	0.00188573	0.00471431	0.00301716	0.00301716	0.00377145	0.00490289	0.00528003	0.00622289	0.00452574	0.00641147	0.00565718	0.00716576	0.00697718	0.00905148	0.00829719	0.0101829	0.0096172	0.0143315	0.0120686	0.022063	0.0190458	0.0318688	0.0284744	0.0488403	0.0544975	0.102772
TCGA-G9-6356	0.00161377	0.00201721	0.00336202	0.00147929	0.00228618	0.00376547	0.00242066	0.00295858	0.00268962	0.00268962	0.00322754	0.00363098	0.00201721	0.00174825	0.00376547	0.00242066	0.0034965	0.00255514	0.00457235	0.00322754	0.00363098	0.00336202	0.0028241	0.00443787	0.00511027	0.00322754	0.00511027	0.00389995	0.00551372	0.00470683	0.00685853	0.00537924	0.00672405	0.00537924	0.00739645	0.00739645	0.0114309	0.0091447	0.013986	0.0125067	0.0149274	0.014255	0.0205756	0.0186928	0.0272996	0.0289134	0.0403443	0.0443787	0.0763852
TCGA-G9-6361	0.00222184	0.00239275	0.00136729	0.00358913	0.00427277	0.00273458	0.00324731	0.00341822	0.00376004	0.00273458	0.00410186	0.00205093	0.00324731	0.00205093	0.00239275	0.00222184	0.00410186	0.00341822	0.00393095	0.00341822	0.00324731	0.00324731	0.00444368	0.00324731	0.00427277	0.00581097	0.00564006	0.00495642	0.00427277	0.00341822	0.0046146	0.00598188	0.00615279	0.00683644	0.00734917	0.00854555	0.00820373	0.00871646	0.00752008	0.0107674	0.0126474	0.0136729	0.0169202	0.0150402	0.0198257	0.0246112	0.0362331	0.0432405	0.0791318
TCGA-G9-6362	0.00314424	0.00248919	0.00235818	0.00327525	0.0026202	0.00353727	0.00537141	0.00340626	0.00301323	0.00340626	0.00458535	0.00340626	0.0039303	0.00340626	0.00366828	0.0039303	0.00458535	0.00366828	0.00537141	0.00314424	0.00445434	0.00537141	0.00615747	0.00510939	0.00707454	0.00707454	0.00432333	0.0065505	0.00930172	0.00668151	0.00917071	0.00812263	0.00917071	0.00838465	0.0116599	0.00877768	0.0142801	0.0115289	0.0157212	0.0200445	0.0209616	0.0203066	0.0284292	0.026333	0.03891	0.038779	0.0638019	0.0609197	0.120136
TCGA-G9-6363	0.00303293	0.00324957	0.00411612	0.00368284	0.00541594	0.00433276	0.00693241	0.00368284	0.00411612	0.00476603	0.0080156	0.00519931	0.00693241	0.00541594	0.00519931	0.00411612	0.00389948	0.00584922	0.0062825	0.00433276	0.00606586	0.0062825	0.00541594	0.00541594	0.0080156	0.00433276	0.00844887	0.00693241	0.010182	0.00671577	0.00844887	0.00671577	0.00844887	0.00866551	0.0114818	0.00996534	0.0151646	0.0121317	0.0132149	0.0136482	0.0151646	0.0123484	0.017331	0.0216638	0.0305459	0.0301127	0.0422444	0.0463605	0.0957539
TCGA-G9-6364	0.00149665	0.00173297	0.00165419	0.00189051	0.00196928	0.00149665	0.00252068	0.00236314	0.00141788	0.00173297	0.00173297	0.000787712	0.00220559	0.00157542	0.0029933	0.00157542	0.00157542	0.00220559	0.00118157	0.00102403	0.00307208	0.00196928	0.00244191	0.00181174	0.00244191	0.00181174	0.00275699	0.00228436	0.00228436	0.00338716	0.00275699	0.00244191	0.00362347	0.00346593	0.00480504	0.00393856	0.00551398	0.00393856	0.00559275	0.00456873	0.00614415	0.00456873	0.00771957	0.00582907	0.0107917	0.0101615	0.0138637	0.0172509	0.0254431
TCGA-G9-6365	0.00132081	0.00088054	0.00264162	0.00176108	0.00234811	0.00220135	0.00220135	0.00234811	0.00205459	0.00190784	0.00264162	0.00176108	0.00278838	0.00205459	0.00308189	0.00117405	0.00366892	0.00293513	0.00308189	0.00190784	0.0033754	0.00205459	0.00293513	0.00264162	0.00308189	0.00425594	0.00366892	0.0033754	0.00513648	0.00293513	0.00454946	0.00352216	0.00513648	0.00410919	0.00631054	0.00557675	0.0088054	0.00645729	0.0104197	0.0113003	0.0126211	0.01086	0.0206927	0.0189316	0.0240681	0.0274435	0.0402113	0.054887	0.0990608
TCGA-G9-6366	0.00213675	0.00641026	0.00451092	0.00356125	0.00498575	0.00451092	0.00546059	0.00308642	0.0042735	0.00522317	0.00403609	0.00546059	0.00308642	0.00332384	0.00308642	0.00451092	0.00474834	0.00474834	0.00356125	0.00664767	0.00593542	0.00783476	0.00546059	0.0042735	0.00569801	0.00332384	0.00712251	0.00617284	0.00878443	0.00735992	0.00973409	0.00735992	0.00949668	0.00807217	0.0106838	0.0109212	0.0147198	0.0140076	0.0111586	0.0156695	0.019943	0.0225546	0.0360874	0.0294397	0.0384615	0.0389364	0.0626781	0.0610161	0.115147
TCGA-G9-6367	0.00408239	0.00426795	0.00593802	0.00445352	0.00501021	0.00668027	0.00686584	0.00482464	0.00575246	0.00519577	0.00538133	0.00501021	0.00408239	0.00686584	0.00575246	0.00408239	0.0090926	0.00445352	0.00612359	0.0055669	0.00723696	0.00538133	0.00630915	0.00668027	0.00964929	0.00630915	0.00890703	0.00835034	0.0103915	0.00797922	0.00927816	0.00723696	0.0115049	0.00779365	0.0100204	0.00853591	0.0148451	0.0120616	0.0122472	0.0124327	0.0152162	0.0137317	0.0261644	0.0202264	0.0317313	0.0337725	0.0515866	0.0578957	0.104472
TCGA-G9-6369	0.000646831	0.00172488	0.00043122	0.00043122	0.00150927	0.00107805	0.00150927	0.000646831	0.00129366	0.00043122	0.00258732	0.00043122	0.00107805	0.000646831	0.00129366	0.00129366	0.00150927	0.000862441	0.00129366	0.00129366	0.000862441	0.000862441	0.00150927	0.0021561	0.00150927	0.00323415	0.0021561	0.00129366	0.00280293	0.00280293	0.00301854	0.00280293	0.00366537	0.00280293	0.00452781	0.00409659	0.00560586	0.00603708	0.00646831	0.00819319	0.0101337	0.00884002	0.0125054	0.0135834	0.0217766	0.0263044	0.042044	0.0474342	0.101121
TCGA-G9-6370	0.00286636	0.00412039	0.00268721	0.00322465	0.00412039	0.00465783	0.0034038	0.00519527	0.00501612	0.0034038	0.00537442	0.00447868	0.00501612	0.00376209	0.00627015	0.00447868	0.00555357	0.00483698	0.00322465	0.00465783	0.00591186	0.00429953	0.00519527	0.00412039	0.00591186	0.00537442	0.00465783	0.00841992	0.00662845	0.00573271	0.00752418	0.00662845	0.00895736	0.0100322	0.00895736	0.0068076	0.0120029	0.00877822	0.0120029	0.0127195	0.0120029	0.012182	0.0128986	0.0136152	0.0223934	0.0198853	0.0315299	0.0300967	0.0530276
TCGA-G9-6371	0.00191525	0.00287288	0.00466842	0.00203495	0.00323198	0.00251377	0.00311228	0.00239406	0.00227436	0.00299258	0.00335169	0.00263347	0.00215466	0.00263347	0.00323198	0.00335169	0.0039502	0.00323198	0.00359109	0.00430931	0.00514723	0.00311228	0.0037108	0.00430931	0.00478813	0.00502753	0.00718219	0.00454872	0.00562605	0.00502753	0.00706249	0.00730189	0.00790041	0.007661	0.00981566	0.00957625	0.00957625	0.0101748	0.0119703	0.0129279	0.0158008	0.0148432	0.0222648	0.0233421	0.0341154	0.0360306	0.060091	0.0570984	0.11276
TCGA-G9-6373	0.000706714	0.00141343	0.00106007	0.00176678	0	0.00212014	0.00176678	0.00176678	0.0024735	0.00212014	0.00318021	0.00176678	0.0024735	0.00176678	0.00318021	0.00141343	0.00176678	0.0024735	0.00212014	0.00176678	0.00176678	0.00141343	0.00318021	0.00282686	0.00141343	0.00388693	0.0024735	0.00424028	0.00212014	0.00459364	0.00318021	0.004947	0.00424028	0.00176678	0.00353357	0.00530035	0.00671378	0.00777385	0.0130742	0.00989399	0.0106007	0.00883392	0.0176678	0.0109541	0.0180212	0.0204947	0.0360424	0.0374558	0.0780919
TCGA-G9-6377	0.000367512	0.00110254	0	0.000367512	0.000367512	0.000367512	0.000735024	0	0.000735024	0	0.00110254	0.000735024	0.000735024	0.000367512	0.000367512	0.00110254	0.000735024	0	0.000367512	0.000735024	0.000367512	0.000367512	0.000367512	0	0.000367512	0.000735024	0.000367512	0.000735024	0.000735024	0.00147005	0.00110254	0.00147005	0.00147005	0.00110254	0.00220507	0.0029401	0.00147005	0.00220507	0.00147005	0.00330761	0.00514517	0.00404263	0.00441014	0.00551268	0.00845277	0.0102903	0.015068	0.0257258	0.0661521
TCGA-G9-6378	0.00229504	0.00420757	0.00701262	0.00408007	0.0056101	0.0057376	0.00752263	0.00612011	0.00816014	0.00535509	0.00714012	0.00624761	0.00701262	0.00535509	0.00803264	0.00841515	0.00879765	0.00624761	0.00765013	0.00650261	0.00854265	0.00637511	0.00956267	0.00688512	0.00828765	0.00739513	0.00905266	0.00816014	0.0105827	0.00918016	0.00918016	0.0100727	0.0124952	0.0118577	0.0151728	0.0113477	0.0140252	0.0130052	0.0168303	0.0174678	0.0221854	0.0188703	0.027158	0.0242254	0.0367206	0.0367206	0.0535509	0.056611	0.0988142
TCGA-G9-6379	0.000581903	0.00145476	0.00203666	0.00232761	0.00116381	0.00203666	0.00203666	0.000872854	0.00203666	0.000581903	0.00378237	0.00232761	0.00232761	0.00203666	0.00145476	0.00174571	0.00407332	0.00203666	0.00116381	0.00261856	0.00203666	0.00145476	0.00261856	0.00290951	0.00378237	0.00523713	0.00378237	0.00349142	0.00610998	0.00378237	0.00610998	0.00494617	0.00640093	0.00640093	0.00785569	0.00843759	0.00989235	0.00669188	0.0165842	0.0096014	0.0171661	0.0151295	0.0215304	0.0189118	0.0407332	0.0389875	0.0608088	0.0628455	0.145476
TCGA-G9-6384	0.0010248	0.00163968	0.00245952	0.00184464	0.00225456	0.00327936	0.0030744	0.00286944	0.00389424	0.00430416	0.00245952	0.00266448	0.00122976	0.00286944	0.00286944	0.00286944	0.00450912	0.00143472	0.00348432	0.00286944	0.00286944	0.00348432	0.00368928	0.00348432	0.00327936	0.00266448	0.00553392	0.00450912	0.00553392	0.00430416	0.00594384	0.00389424	0.00676368	0.00532896	0.00696864	0.00553392	0.0112728	0.010453	0.0170117	0.0116827	0.0114778	0.0161918	0.0231605	0.020701	0.0317688	0.0379176	0.0625128	0.0637426	0.125436
TCGA-G9-6385	0.00285379	0.00302166	0.00318952	0.00302166	0.00352526	0.00352526	0.00436461	0.00335739	0.00268592	0.00369313	0.00402887	0.00251805	0.00352526	0.00402887	0.00369313	0.00302166	0.00470035	0.00268592	0.003861	0.00570757	0.00520396	0.00503609	0.00453248	0.00436461	0.00352526	0.00453248	0.00520396	0.00436461	0.00654692	0.00570757	0.00587544	0.00503609	0.00923284	0.00755414	0.00839349	0.00805775	0.00906497	0.00805775	0.0142689	0.0134296	0.0166191	0.0159476	0.0229982	0.0240054	0.0323989	0.0329025	0.0570757	0.0634548	0.110458
TCGA-G9-6494	0.000985869	0.00164312	0.00213605	0.00197174	0.00230036	0.00246467	0.0027933	0.00295761	0.00312192	0.000985869	0.00246467	0.00328623	0.00312192	0.00328623	0.00246467	0.00295761	0.00377917	0.0027933	0.00230036	0.00295761	0.00312192	0.00312192	0.00476503	0.00377917	0.0042721	0.0042721	0.00591522	0.0042721	0.00509366	0.00542228	0.00690108	0.00607953	0.00624384	0.00722971	0.00788695	0.00903713	0.0131449	0.0119947	0.0141308	0.0141308	0.0177456	0.014788	0.0246467	0.0192244	0.0305619	0.0340125	0.0496221	0.0547157	0.0971081
TCGA-G9-6496	0.00214002	0.00336289	0.00458575	0.00214002	0.00275145	0.0018343	0.0036686	0.00397432	0.00152858	0.00214002	0.00428004	0.00458575	0.00428004	0.00336289	0.00428004	0.0036686	0.00428004	0.00458575	0.00305717	0.00397432	0.00458575	0.00244574	0.00642006	0.00397432	0.0036686	0.00428004	0.00580862	0.00489147	0.00764292	0.00305717	0.00917151	0.00489147	0.00947722	0.00580862	0.00886579	0.00856007	0.00947722	0.00886579	0.0113115	0.0100887	0.016203	0.0174259	0.020483	0.0223173	0.0385203	0.036686	0.0525833	0.0583919	0.119841
TCGA-G9-6498	0.00206665	0.00284164	0.00361664	0.00232498	0.00154999	0.00284164	0.00361664	0.00309997	0.00439163	0.00309997	0.00284164	0.00180832	0.00361664	0.00335831	0.00464996	0.00129166	0.00335831	0.0041333	0.00258331	0.00335831	0.00542495	0.00387497	0.00490829	0.00490829	0.00516662	0.00439163	0.00671661	0.00439163	0.00335831	0.00387497	0.00852493	0.0082666	0.00904159	0.00852493	0.00774994	0.0100749	0.0103332	0.00929992	0.0144665	0.00878326	0.0178249	0.0209248	0.0229915	0.0273831	0.0387497	0.0480496	0.0681994	0.0746577	0.152157
TCGA-G9-7510	0.00109769	0.000548847	0.00109769	0.000274424	0.000823271	0.00192097	0.000823271	0	0.000548847	0.00137212	0.00164654	0.000274424	0.00137212	0.00137212	0.000548847	0.00164654	0.00164654	0.00109769	0.00219539	0.000823271	0.00164654	0.000823271	0.00219539	0.00246981	0.000823271	0.00274424	0.00329308	0.00109769	0.0046652	0.00164654	0.0057629	0.00274424	0.00548847	0.00274424	0.0046652	0.0057629	0.00521405	0.00658617	0.00933041	0.00960483	0.0115258	0.0101537	0.0145445	0.0145445	0.0225027	0.0279912	0.0354007	0.0447311	0.079034
TCGA-G9-7519	0.0040037	0.00585156	0.0040037	0.00338774	0.00492763	0.00307977	0.00554358	0.00246381	0.00585156	0.00369572	0.00677549	0.00492763	0.00585156	0.00554358	0.00677549	0.0052356	0.00831537	0.00585156	0.00677549	0.00492763	0.00739144	0.0052356	0.00831537	0.00492763	0.00769941	0.00615953	0.0092393	0.0107792	0.0113951	0.00893132	0.0117031	0.00769941	0.0144749	0.0104712	0.0107792	0.012935	0.0147829	0.0138589	0.0212504	0.0209424	0.0249461	0.0175547	0.02587	0.0255621	0.0384971	0.0375731	0.0600554	0.05328	0.0957807
TCGA-G9-7521	0.00107797	0.00179662	0.00251527	0.0014373	0.0014373	0.00503054	0.00359324	0.0014373	0.00359324	0.0014373	0.00431189	0.00179662	0.00215595	0.00179662	0.00395257	0.0014373	0.00179662	0.00251527	0.00323392	0.00179662	0.00215595	0.00359324	0.00503054	0.00503054	0.00610852	0.0028746	0.00431189	0.00395257	0.00646784	0.00359324	0.00610852	0.00790514	0.00718649	0.00610852	0.00790514	0.00718649	0.00898311	0.00682716	0.0118577	0.0114984	0.0197628	0.0172476	0.025512	0.0244341	0.0370104	0.0359324	0.0596479	0.0693496	0.118577
TCGA-G9-7522	0.000378072	0.000756144	0	0.000378072	0.000756144	0.000756144	0.00151229	0	0.000756144	0.000378072	0.00113422	0.000378072	0.000756144	0.000756144	0.000378072	0.000756144	0.00151229	0.000756144	0.00113422	0.0026465	0.000756144	0.000378072	0.000378072	0.00151229	0.000756144	0.00151229	0.00113422	0.000756144	0.0026465	0.00113422	0.00189036	0.00302457	0.0026465	0.00189036	0.00378072	0.00226843	0.00680529	0.00453686	0.00567108	0.0102079	0.0117202	0.00907372	0.0155009	0.0155009	0.0283554	0.0238185	0.0551985	0.0722117	0.124764
TCGA-G9-7523	0.000533903	0.00320342	0.00266951	0.00160171	0.00587293	0.00160171	0.00266951	0.00373732	0.00320342	0.00320342	0.00266951	0.00373732	0.00427122	0.00106781	0.00480513	0.00213561	0.00320342	0.00320342	0.00533903	0.00587293	0.00480513	0.00213561	0.00640683	0.00694074	0.00854245	0.00587293	0.00480513	0.00640683	0.00533903	0.00480513	0.00480513	0.00587293	0.0106781	0.00854245	0.00587293	0.00694074	0.00854245	0.00533903	0.0101442	0.00800854	0.0154832	0.016551	0.0224239	0.016551	0.0234917	0.0229578	0.0363054	0.0517886	0.0950347
TCGA-G9-7525	0.00250784	0.00397074	0.0045977	0.00355277	0.00292581	0.00355277	0.0031348	0.00208986	0.00543365	0.00292581	0.00397074	0.0031348	0.00376176	0.00208986	0.00376176	0.00376176	0.00626959	0.00334378	0.00355277	0.00334378	0.00585162	0.00376176	0.00522466	0.00355277	0.00543365	0.00417973	0.00480669	0.00438871	0.00585162	0.00585162	0.00626959	0.00564263	0.00626959	0.00626959	0.00961338	0.00856844	0.0110763	0.00794148	0.0133751	0.0125392	0.014838	0.0123302	0.0229885	0.0196447	0.0275862	0.0284222	0.0486938	0.0524556	0.0978056
TCGA-G9-A9S0	0.00248644	0.00361664	0.00565099	0.0033906	0.00497288	0.00406872	0.00542495	0.0045208	0.00429476	0.00271248	0.00361664	0.00497288	0.00610307	0.00384268	0.00474684	0.00678119	0.00610307	0.00565099	0.00565099	0.00474684	0.00700723	0.00610307	0.00678119	0.00497288	0.00700723	0.00497288	0.00791139	0.00723327	0.00768535	0.00813743	0.0103978	0.00700723	0.00949367	0.00791139	0.0135624	0.00971971	0.0146926	0.0122061	0.017179	0.0140145	0.0235081	0.0194394	0.0316456	0.02283	0.0359403	0.040009	0.0599005	0.0637432	0.105108
TCGA-G9-A9S4	0.0026053	0.00564481	0.00629614	0.00412505	0.0026053	0.00455927	0.00586192	0.00564481	0.00412505	0.00303951	0.00694746	0.00521059	0.00521059	0.00412505	0.00629614	0.0054277	0.00781589	0.00607903	0.00521059	0.00455927	0.00607903	0.00607903	0.00673035	0.00673035	0.0104212	0.00781589	0.00738168	0.00716457	0.00955276	0.00868432	0.0102041	0.0102041	0.0130265	0.0115067	0.0112896	0.0136778	0.0167173	0.0154147	0.0199739	0.0206253	0.0199739	0.0251845	0.0284412	0.0310465	0.0423361	0.0308294	0.0627442	0.0633956	0.0950934
TCGA-G9-A9S7	0.00220751	0.00441501	0.00409965	0.00283822	0.00504573	0.00441501	0.00567644	0.00252286	0.00473037	0.00536108	0.00630716	0.00283822	0.00819931	0.00504573	0.00567644	0.00504573	0.00693787	0.00441501	0.0059918	0.00725323	0.00567644	0.00504573	0.00725323	0.00473037	0.00441501	0.00662252	0.00851466	0.00756859	0.0110375	0.00756859	0.0100915	0.0113529	0.0138757	0.0116682	0.0173447	0.013245	0.0195522	0.0119836	0.0170293	0.0179754	0.0277515	0.0198675	0.0318512	0.0233365	0.0394197	0.0334279	0.0696941	0.0580259	0.0930306
TCGA-H9-7775	0.00410678	0.00410678	0.00821355	0.0143737	0.0184805	0.00616016	0.0184805	0.0102669	0.0123203	0.00616016	0.0123203	0.0102669	0.0123203	0.0164271	0.0123203	0.0102669	0.0102669	0.0143737	0.0143737	0.0205339	0.0164271	0.0143737	0.0123203	0.0143737	0.0225873	0.00821355	0.0328542	0.0102669	0.0143737	0.00821355	0.0205339	0.0102669	0.0143737	0.0164271	0.0184805	0.0246407	0.0225873	0.0225873	0.0308008	0.0246407	0.0246407	0.0184805	0.0328542	0.0410678	0.0349076	0.0205339	0.0225873	0.0349076	0.0492813
TCGA-H9-A6BX	0.000880282	0.00352113	0.00264085	0.00616197	0.00264085	0.00616197	0.00528169	0.0096831	0.00264085	0.00704225	0.00352113	0.00264085	0.000880282	0.00352113	0.00792254	0.00440141	0.00352113	0.00616197	0.00880282	0.00704225	0.00352113	0.00616197	0.00792254	0.00704225	0.00704225	0.00528169	0.00880282	0.00880282	0.0123239	0.0096831	0.0096831	0.0132042	0.0096831	0.0184859	0.0193662	0.0105634	0.0211268	0.0158451	0.0202465	0.0176056	0.0308099	0.0352113	0.0308099	0.0237676	0.0510563	0.0519366	0.0730634	0.0704225	0.0933099
TCGA-H9-A6BY	0.00767754	0.00575816	0.00959693	0.00959693	0.0134357	0.0191939	0.0153551	0.00767754	0.00767754	0.0172745	0.0153551	0.0115163	0.0153551	0.00959693	0.00959693	0.0172745	0.0134357	0.00959693	0.0115163	0.0115163	0.0115163	0.0211132	0.0211132	0.00767754	0.0153551	0.0115163	0.0172745	0.00767754	0.0211132	0.0134357	0.0172745	0.0115163	0.0134357	0.0134357	0.00767754	0.0153551	0.0191939	0.0191939	0.0172745	0.024952	0.0268714	0.0153551	0.0326296	0.024952	0.0441459	0.024952	0.0537428	0.0441459	0.0652591
TCGA-HC-7075	0	0.00248139	0	0	0	0	0	0.00248139	0.00248139	0.00496278	0.00744417	0.00496278	0.00744417	0	0.00744417	0	0	0	0.00248139	0.00744417	0	0.00248139	0.00248139	0.00496278	0.00248139	0.00992556	0	0.00496278	0.00744417	0.00744417	0.00992556	0.00744417	0.00992556	0.00496278	0	0.00496278	0.00496278	0.00744417	0.00248139	0.0124069	0.0173697	0.0173697	0.0223325	0.0223325	0.0223325	0.0248139	0.0521092	0.0669975	0.156328
TCGA-HC-7077	0.00920245	0	0.00306748	0.00613497	0.0122699	0.0214724	0.00613497	0.0122699	0.0122699	0.00306748	0.00613497	0.0153374	0.00306748	0.00920245	0.0153374	0.0184049	0.0184049	0.00613497	0.00306748	0.0214724	0	0.00613497	0.0153374	0.0184049	0.00613497	0.00920245	0.00920245	0.00920245	0.0153374	0.0184049	0.0276074	0.0122699	0.00920245	0.0122699	0.00613497	0.00306748	0.0214724	0.00920245	0.0276074	0.00613497	0.0429448	0.0184049	0.0337423	0.0245399	0.0368098	0.0306748	0.0613497	0.0306748	0.110429
TCGA-HC-7078	0.00746269	0.0149254	0.00746269	0	0	0.00746269	0	0	0.00746269	0	0	0	0	0	0	0.0149254	0	0.0223881	0.00746269	0.0149254	0	0	0.00746269	0	0	0	0.00746269	0	0.00746269	0	0.00746269	0.0149254	0.0149254	0.0298507	0.00746269	0	0.0223881	0.00746269	0.0298507	0.0149254	0.00746269	0.00746269	0.0522388	0.00746269	0.0597015	0.0447761	0.0671642	0.0522388	0.171642
TCGA-HC-7079	0.0107991	0.00215983	0.00863931	0.00863931	0.0107991	0.00863931	0.0237581	0.00647948	0.012959	0.0151188	0.012959	0.012959	0.0151188	0.0151188	0.012959	0.0107991	0.012959	0.00863931	0.00863931	0.012959	0.0237581	0.00863931	0.0194384	0.0259179	0.0151188	0.0151188	0.0172786	0.012959	0.0323974	0.0107991	0.0280778	0.012959	0.012959	0.0259179	0.012959	0.0259179	0.0323974	0.0215983	0.0280778	0.0237581	0.0215983	0.0151188	0.0323974	0.0215983	0.0388769	0.0345572	0.0475162	0.0475162	0.049676
TCGA-HC-7080	0.0078125	0	0	0.0078125	0.0078125	0.0078125	0.015625	0.0078125	0.0234375	0.0078125	0	0.0078125	0.0078125	0.015625	0	0.0078125	0.015625	0.0234375	0	0	0.015625	0.0078125	0.0078125	0.0078125	0.0078125	0.015625	0.03125	0.0234375	0.015625	0.0078125	0.015625	0.0078125	0.0078125	0.015625	0.046875	0.015625	0.0390625	0.015625	0.03125	0.0390625	0.015625	0.0390625	0.0625	0.015625	0.0625	0	0.0546875	0.0703125	0.0703125
TCGA-HC-7081	0.00582524	0.00776699	0.015534	0.0135922	0.00776699	0.0038835	0.00970874	0.0135922	0.00582524	0.00776699	0.0116505	0.015534	0.0174757	0.015534	0.0116505	0.0116505	0.0213592	0.0174757	0.015534	0.0174757	0.015534	0.0116505	0.00776699	0.00776699	0.0291262	0.0116505	0.015534	0.023301	0.015534	0.0174757	0.0252427	0.0116505	0.0213592	0.023301	0.023301	0.0271845	0.023301	0.0174757	0.0330097	0.00970874	0.0271845	0.0213592	0.038835	0.0174757	0.0368932	0.0194175	0.038835	0.0368932	0.0563107
TCGA-HC-7209	0.00649351	0.00974026	0.00974026	0.012987	0.00649351	0.012987	0.012987	0.00974026	0.0227273	0.012987	0.00649351	0.00974026	0.00974026	0.00324675	0.012987	0.00974026	0.00649351	0.0194805	0.00649351	0.012987	0.0324675	0.00649351	0.0292208	0.0162338	0.00649351	0.012987	0.025974	0.0162338	0.0194805	0.00649351	0.0194805	0.0194805	0.0162338	0.0162338	0.0194805	0.00974026	0.0357143	0.012987	0.0194805	0.0194805	0.0162338	0.0454545	0.0357143	0.0227273	0.0162338	0.0357143	0.038961	0.0227273	0.0487013
TCGA-HC-7210	0.00557621	0.00557621	0.00557621	0.00185874	0.00185874	0	0.00371747	0.00557621	0.00929368	0.00743494	0.00929368	0.00557621	0	0.00557621	0.00743494	0.00743494	0.00557621	0.00929368	0.00929368	0.00743494	0.0130112	0.00929368	0.00743494	0.0130112	0.00929368	0.00371747	0.00185874	0.0130112	0.0167286	0.00743494	0.0167286	0.0130112	0.0130112	0.00929368	0.0111524	0.0204461	0.0260223	0.0390335	0.0241636	0.0334572	0.0408922	0.027881	0.0408922	0.0204461	0.0427509	0.0539033	0.0613383	0.0576208	0.0650558
TCGA-HC-7211	0.00301811	0.00503018	0.00402414	0.00201207	0.00905433	0.00704225	0.00704225	0.00402414	0.00503018	0.00503018	0.00402414	0.00603622	0.00402414	0.00603622	0.00804829	0.00704225	0.00503018	0.00603622	0.00905433	0.00804829	0.00603622	0.00301811	0.00503018	0.00905433	0.00503018	0.00804829	0.0120724	0.0100604	0.0100604	0.0110664	0.0120724	0.00402414	0.0110664	0.0160966	0.0130785	0.0181087	0.0191147	0.0150905	0.0241449	0.0201207	0.0201207	0.0231388	0.028169	0.027163	0.0331992	0.0392354	0.0573441	0.0663984	0.115694
TCGA-HC-7212	0	0.00898204	0.00898204	0.00299401	0.011976	0.00449102	0.011976	0.0134731	0.00598802	0.00449102	0.0134731	0.00748503	0.010479	0.00748503	0.00898204	0.0149701	0.0134731	0.0134731	0.00598802	0.00748503	0.0164671	0.00299401	0.00898204	0.011976	0.00898204	0.00898204	0.0269461	0.00748503	0.0164671	0.0194611	0.0149701	0.0149701	0.0209581	0.0134731	0.0134731	0.011976	0.0284431	0.0209581	0.0299401	0.0224551	0.0209581	0.0239521	0.0404192	0.0314371	0.0464072	0.0374251	0.0628743	0.0508982	0.0688623
TCGA-HC-7213	0.00263852	0.00527704	0.00395778	0.00659631	0.00395778	0.0145119	0.00923483	0.00659631	0.00791557	0.00791557	0.0118734	0.00263852	0.0131926	0.00791557	0.00659631	0.00791557	0.0131926	0.0131926	0.0158311	0.0145119	0.0131926	0.0145119	0.0118734	0.00923483	0.0105541	0.00923483	0.0131926	0.0145119	0.00791557	0.0131926	0.0118734	0.00791557	0.0184697	0.0211082	0.0356201	0.0184697	0.0382586	0.0184697	0.0224274	0.0237467	0.0382586	0.0277045	0.0448549	0.0422164	0.0527704	0.0514512	0.0593668	0.0501319	0.060686
TCGA-HC-7230	0.00130039	0.00390117	0.00260078	0.00650195	0.00130039	0.00130039	0.00130039	0.00130039	0.00260078	0.00130039	0.00260078	0.00130039	0.00780234	0.00780234	0.00260078	0.00130039	0.00910273	0.00910273	0.00780234	0.0104031	0.00910273	0.00260078	0.00650195	0.00780234	0.0130039	0.00390117	0.00390117	0.00650195	0.00650195	0.00910273	0.0104031	0.00390117	0.00650195	0.00650195	0.0130039	0.00520156	0.0169051	0.0195059	0.0156047	0.0169051	0.0247074	0.0351105	0.0247074	0.0325098	0.0481144	0.046814	0.0702211	0.0884265	0.104031
TCGA-HC-7231	0.00510204	0	0.00510204	0.0102041	0	0.0102041	0	0.00510204	0	0.0153061	0.00510204	0.00510204	0	0.0102041	0.0102041	0	0.00510204	0	0.0102041	0.00510204	0.00510204	0.00510204	0.0102041	0.0102041	0.0102041	0.00510204	0.00510204	0	0.0204082	0	0.0102041	0	0.0204082	0.0153061	0.0204082	0.00510204	0.0153061	0.0102041	0.0357143	0.0306122	0.0306122	0.0153061	0.0255102	0.0153061	0.0357143	0.0408163	0.0357143	0.0663265	0.117347
TCGA-HC-7232	0.0110701	0.00645756	0.00830258	0.00738007	0.0101476	0.0147601	0.0147601	0.00645756	0.0119926	0.0101476	0.0119926	0.0101476	0.0129151	0.00922509	0.0230627	0.00738007	0.0110701	0.00738007	0.0166052	0.0193727	0.0147601	0.0129151	0.0175277	0.0110701	0.0147601	0.0147601	0.0129151	0.0119926	0.0156827	0.0175277	0.0184502	0.0193727	0.0193727	0.0184502	0.0166052	0.0175277	0.0184502	0.0129151	0.0193727	0.0221402	0.0295203	0.0175277	0.0369004	0.0276753	0.0405904	0.0369004	0.0654982	0.0461255	0.045203
TCGA-HC-7233	0	0.00628931	0.00628931	0.00314465	0.00943396	0.00314465	0.00314465	0.00314465	0.00314465	0.00314465	0.00314465	0.00628931	0.00628931	0	0.00314465	0.00314465	0.00628931	0	0	0.00314465	0	0.0157233	0.0125786	0.00628931	0.00628931	0.00628931	0	0.00943396	0.00628931	0.00314465	0.00628931	0.00314465	0	0.00314465	0.00943396	0.00628931	0.00628931	0.0157233	0.0157233	0.0188679	0.0220126	0.0314465	0.0283019	0.0345912	0.0377358	0.0220126	0.0377358	0.0534591	0.100629
TCGA-HC-7736	0.00278293	0.00649351	0.00463822	0.000927644	0.00185529	0.00185529	0.00556586	0.00278293	0.000927644	0.00463822	0.00463822	0.00278293	0.00371058	0.00371058	0.00463822	0.00185529	0.00371058	0.00556586	0.00185529	0.00278293	0.00742115	0.00834879	0.00463822	0.00649351	0.00463822	0.00463822	0.00371058	0.00278293	0.00463822	0.00649351	0.00834879	0.00556586	0.012987	0.00649351	0.0139147	0.0120594	0.0102041	0.0111317	0.0194805	0.0157699	0.0222635	0.028757	0.0278293	0.025974	0.0343228	0.0371058	0.0612245	0.0788497	0.16141
TCGA-HC-7737	0.00606061	0.00606061	0	0	0.0121212	0.0242424	0.0121212	0.0181818	0.00606061	0	0.00606061	0	0	0.00606061	0	0	0	0	0.00606061	0.00606061	0.00606061	0.00606061	0.00606061	0.00606061	0.0181818	0.00606061	0.0121212	0.0121212	0.0121212	0.00606061	0.0242424	0.0121212	0.00606061	0.0181818	0.0121212	0.0121212	0	0.00606061	0.0242424	0.030303	0.0121212	0.0242424	0.0121212	0.0242424	0.0666667	0.0363636	0.0545455	0.0727273	0.127273
TCGA-HC-7738	0.00315039	0.00447687	0.00679821	0.00547173	0.00911955	0.00630078	0.00696402	0.00480849	0.00596916	0.00580335	0.00712983	0.00530592	0.00762726	0.00563754	0.00812469	0.00596916	0.00779307	0.00596916	0.00878793	0.00762726	0.00812469	0.00762726	0.010446	0.00712983	0.00862212	0.0066324	0.0099486	0.00845631	0.0099486	0.0101144	0.0116067	0.00961698	0.0145913	0.0132648	0.0162494	0.0137622	0.0185707	0.0170784	0.0225502	0.01741	0.0253689	0.0263638	0.0273586	0.0283535	0.0402918	0.0404576	0.0631736	0.0557122	0.0958382
TCGA-HC-7740	0.00443262	0.00443262	0.0070922	0.00531915	0.0124113	0.00975177	0.0115248	0.00797872	0.00886525	0.00975177	0.0115248	0.016844	0.00975177	0.00975177	0.00531915	0.00975177	0.00620567	0.0070922	0.00797872	0.0070922	0.00620567	0.0070922	0.00797872	0.00975177	0.0106383	0.00886525	0.0150709	0.0115248	0.0150709	0.0115248	0.0141844	0.0106383	0.0248227	0.00886525	0.0150709	0.0115248	0.0141844	0.0248227	0.0230496	0.0265957	0.0336879	0.0248227	0.035461	0.0292553	0.0390071	0.0407801	0.0602837	0.0647163	0.0824468
TCGA-HC-7741	0.00679502	0.00679502	0.00792752	0.00679502	0.00679502	0.00566251	0.011325	0.00792752	0.0101925	0.0101925	0.00679502	0.00566251	0.00339751	0.00792752	0.00906002	0.00792752	0.011325	0.00906002	0.01359	0.00566251	0.011325	0.00906002	0.011325	0.0101925	0.0124575	0.01812	0.00792752	0.01359	0.011325	0.01812	0.0215176	0.0203851	0.0237826	0.0124575	0.0226501	0.00906002	0.0203851	0.0147225	0.0226501	0.0124575	0.0351076	0.0305776	0.0407701	0.0351076	0.0611552	0.0509626	0.0486976	0.0611552	0.0792752
TCGA-HC-7742	0.00257069	0.0102828	0.0128535	0.00514139	0.0128535	0.0102828	0.0102828	0.0179949	0.00514139	0.00771208	0.0102828	0.00257069	0.0102828	0.00514139	0.0154242	0.0102828	0.00771208	0.00771208	0.00771208	0.0102828	0.0154242	0.0205656	0.0205656	0.0102828	0.0154242	0.0179949	0.0179949	0.00771208	0.0179949	0.0102828	0.00771208	0.0179949	0.0179949	0.0231362	0.0308483	0.0308483	0.0205656	0.0179949	0.0205656	0.0102828	0.0411311	0.0128535	0.033419	0.0231362	0.0282776	0.0488432	0.0385604	0.0437018	0.0848329
TCGA-HC-7744	0.00280636	0.00935454	0.00841908	0.00561272	0.00467727	0.00280636	0.00841908	0.00374181	0.00654818	0.00280636	0.01029	0.00280636	0.00467727	0.00748363	0.00467727	0.00654818	0.00374181	0.00561272	0.00374181	0.00654818	0.00748363	0.00280636	0.00748363	0.00748363	0.01029	0.00467727	0.0130964	0.00841908	0.00467727	0.0140318	0.00935454	0.0130964	0.0130964	0.0140318	0.0159027	0.0121609	0.0261927	0.01029	0.0280636	0.0168382	0.0280636	0.03087	0.04116	0.0364827	0.0617399	0.0589336	0.0748363	0.0767072	0.109448
TCGA-HC-7745	0	0	0.00316957	0.00633914	0.00316957	0.00633914	0.00158479	0.00633914	0.00633914	0.00633914	0.00950872	0.00792393	0.00158479	0.00158479	0.00316957	0.00475436	0.00475436	0.00316957	0.00158479	0.00316957	0.00792393	0.00158479	0.00950872	0.0126783	0.00792393	0.00475436	0.00950872	0.00475436	0.0110935	0.00950872	0.0110935	0.00633914	0.0190174	0.0158479	0.022187	0.0110935	0.022187	0.0126783	0.0206022	0.0237718	0.0301109	0.0206022	0.0316957	0.0332805	0.0412044	0.0522979	0.0681458	0.0649762	0.110935
TCGA-HC-7747	0.00319829	0.00639659	0.00746269	0.00426439	0.0010661	0.0021322	0.00959488	0.010661	0.00426439	0.00319829	0.00533049	0.00319829	0.00426439	0.00319829	0.00319829	0.00639659	0.00852878	0.00319829	0.00639659	0.010661	0.00319829	0.010661	0.0127932	0.00319829	0.00852878	0.010661	0.0170576	0.010661	0.00959488	0.0149254	0.0127932	0.0117271	0.0117271	0.0138593	0.0234542	0.0159915	0.0127932	0.0149254	0.0159915	0.0234542	0.033049	0.0277186	0.0373134	0.04371	0.0554371	0.0458422	0.0746269	0.0682303	0.0810235
TCGA-HC-7748	0.00545455	0.00727273	0.0145455	0.0109091	0.0136364	0.01	0.01	0.00636364	0.00909091	0.0118182	0.0127273	0.00727273	0.0163636	0.0109091	0.0118182	0.0109091	0.0127273	0.0172727	0.0154545	0.0145455	0.00909091	0.0154545	0.0136364	0.00909091	0.0163636	0.0118182	0.0181818	0.0163636	0.0190909	0.0163636	0.0181818	0.0172727	0.0245455	0.0172727	0.0127273	0.0127273	0.0145455	0.0172727	0.0263636	0.02	0.03	0.0327273	0.0336364	0.0309091	0.04	0.0463636	0.0490909	0.0563636	0.0627273
TCGA-HC-7749	0.00612245	0.00204082	0.00408163	0.00204082	0.00204082	0	0.00816327	0.00408163	0.00204082	0.00204082	0.00408163	0.00408163	0.0102041	0.00204082	0.00204082	0.00204082	0.0142857	0.0102041	0.00204082	0	0.0102041	0.00816327	0.00612245	0.00612245	0.0102041	0.00816327	0.00408163	0.00612245	0.00612245	0.00204082	0.0122449	0.0163265	0.00612245	0.0142857	0.0142857	0.0102041	0.00408163	0.0102041	0.0183673	0.00612245	0.0142857	0.0244898	0.0285714	0.0244898	0.0265306	0.0326531	0.0367347	0.0510204	0.077551
TCGA-HC-7750	0.00757576	0.0132576	0.0132576	0.0113636	0.0132576	0.0132576	0.0227273	0.0151515	0.0113636	0.00378788	0.0094697	0.0151515	0.0208333	0.0170455	0.0094697	0.0151515	0.0189394	0.0113636	0.0113636	0.0113636	0.0132576	0.0151515	0.0265152	0.0113636	0.0170455	0.0227273	0.0208333	0.0208333	0.032197	0.00757576	0.0170455	0.0132576	0.0340909	0.0151515	0.0227273	0.0265152	0.0208333	0.0170455	0.0284091	0.0227273	0.0378788	0.0094697	0.030303	0.0454545	0.0397727	0.030303	0.0170455	0.0284091	0.0492424
TCGA-HC-7752	0.002079	0.002079	0.002079	0.00623701	0.004158	0.014553	0.002079	0.004158	0.010395	0.00623701	0.00831601	0.00623701	0.012474	0.004158	0.00623701	0.00831601	0.010395	0.016632	0.018711	0.010395	0.018711	0.00831601	0.022869	0.00623701	0.014553	0.00831601	0.022869	0.00623701	0.02079	0.016632	0.014553	0.012474	0.012474	0.00831601	0.02079	0.022869	0.018711	0.016632	0.024948	0.024948	0.039501	0.031185	0.029106	0.04158	0.0665281	0.0519751	0.0686071	0.0561331	0.0540541
TCGA-HC-7817	0.00958466	0.00319489	0.0159744	0.00958466	0.0127796	0.0159744	0.0159744	0.00638978	0.0223642	0.0127796	0.0159744	0.00638978	0.0159744	0.0127796	0.00319489	0.00958466	0.00638978	0.0159744	0.0191693	0.00319489	0.00958466	0.0159744	0.00638978	0.00958466	0.00958466	0.0191693	0.0255591	0.00958466	0.0127796	0.0223642	0.0127796	0.0159744	0.0255591	0.0319489	0.0415335	0.0159744	0.0159744	0.0191693	0.0159744	0.0351438	0.0191693	0.0191693	0.0255591	0.028754	0.0351438	0.0191693	0.0447284	0.0447284	0.0415335
TCGA-HC-7818	0.00497925	0.0107884	0.0116183	0.0141079	0.0116183	0.0107884	0.0182573	0.00912863	0.00995851	0.00829876	0.0107884	0.0107884	0.00912863	0.00829876	0.013278	0.00580913	0.006639	0.00746888	0.0116183	0.00912863	0.0149378	0.0149378	0.013278	0.0116183	0.013278	0.0157676	0.0141079	0.0124481	0.0165975	0.0174274	0.0116183	0.0107884	0.0207469	0.013278	0.0224066	0.0165975	0.0215768	0.0207469	0.0182573	0.019917	0.0298755	0.0182573	0.033195	0.0323651	0.0381743	0.033195	0.0556017	0.0481328	0.06639
TCGA-HC-7819	0	0.00207469	0	0.00414938	0.00414938	0.00207469	0.00207469	0.00207469	0.00414938	0.00622407	0.00414938	0.00207469	0.00414938	0.00207469	0.00207469	0.00622407	0.00414938	0.00829876	0.00622407	0.00414938	0.00207469	0.00622407	0.00829876	0.00829876	0.00414938	0.00622407	0.00207469	0.00622407	0.0145228	0.00829876	0.0207469	0.0145228	0.0186722	0.0145228	0.0186722	0.00622407	0.0145228	0.0124481	0.0290456	0.026971	0.0456432	0.0311203	0.0518672	0.0477178	0.0622407	0.0456432	0.0684647	0.0809129	0.10166
TCGA-HC-7820	0.00151682	0.00261997	0.00427468	0.00234418	0.00261997	0.00261997	0.00330943	0.00234418	0.00234418	0.00151682	0.00358522	0.00206839	0.00289575	0.00234418	0.00275786	0.00275786	0.00537783	0.00234418	0.00468836	0.00261997	0.00289575	0.00372311	0.00358522	0.00358522	0.00413679	0.00427468	0.00427468	0.00482625	0.00510204	0.00510204	0.00717044	0.00523993	0.00703254	0.00703254	0.00854937	0.00799779	0.0111693	0.0117209	0.0144788	0.0117209	0.0197187	0.0173745	0.0239934	0.0223387	0.0372311	0.0321291	0.0581908	0.0568119	0.0944567
TCGA-HC-7821	0.000938967	0.0056338	0.0028169	0.00751174	0.0056338	0.00657277	0.00469484	0.00469484	0.00375587	0.0056338	0.00375587	0.00469484	0.0056338	0.00469484	0.00469484	0.00469484	0.00187793	0.0028169	0.0056338	0.00375587	0.0103286	0.00469484	0.0140845	0.0112676	0.00469484	0.0112676	0.0178404	0.0112676	0.0131455	0.0103286	0.00938967	0.00938967	0.0159624	0.0150235	0.0150235	0.0131455	0.0215962	0.0159624	0.029108	0.0244131	0.0319249	0.0319249	0.0422535	0.0356808	0.0535211	0.056338	0.0788732	0.0807512	0.120188
TCGA-HC-8212	0.00364299	0.00364299	0.00546448	0.00910747	0.00182149	0.00364299	0.00364299	0.00546448	0.00728597	0.00728597	0.00546448	0.00182149	0.00364299	0.00364299	0.00364299	0.00546448	0.00546448	0.00364299	0.00546448	0.00182149	0.00546448	0.00364299	0.00546448	0.00364299	0.00182149	0.00364299	0.00546448	0.00728597	0.00728597	0.00728597	0.00910747	0.00910747	0.00728597	0.0163934	0.00910747	0.00182149	0.00364299	0.00910747	0.0145719	0.010929	0.0273224	0.0127505	0.0236794	0.0127505	0.0255009	0.0418944	0.0619308	0.0546448	0.129326
TCGA-HC-8213	0.00462428	0.00231214	0.00346821	0.00231214	0.00462428	0	0.00346821	0.00115607	0.00231214	0.00346821	0.00115607	0.00231214	0.00231214	0.00346821	0.00231214	0.00231214	0.00578035	0.00231214	0.00462428	0.00346821	0.00578035	0.00231214	0.00462428	0.00462428	0.00693642	0.00693642	0.00115607	0.00462428	0.00231214	0.00346821	0.00693642	0.0115607	0.00693642	0.00578035	0.00924855	0.0127168	0.0150289	0.0115607	0.0196532	0.0265896	0.0231214	0.0323699	0.0323699	0.0312139	0.0520231	0.0624277	0.0682081	0.0820809	0.134104
TCGA-HC-8216	0.00917431	0.00611621	0.00917431	0.00917431	0.0183486	0.0244648	0.00611621	0.0183486	0.0183486	0.00611621	0	0.00917431	0.00611621	0.00611621	0.0030581	0.00611621	0.00611621	0	0.0244648	0.0183486	0.0214067	0.00611621	0.0183486	0.00611621	0.0122324	0.00917431	0.0122324	0.0183486	0.0214067	0.0152905	0.00917431	0.0122324	0.0152905	0.0152905	0.0336391	0.0244648	0.0336391	0.030581	0.0366972	0.0152905	0.0214067	0.0397554	0.0366972	0.0366972	0.0366972	0.0428135	0.0397554	0.0366972	0.0795107
TCGA-HC-8256	0.000741015	0.00333457	0.00185254	0.00222305	0.00185254	0.00259355	0.00111152	0.00222305	0.00148203	0.00370508	0.00259355	0.00148203	0.00370508	0.00222305	0.00185254	0.00296406	0.00185254	0.00222305	0.00333457	0.00296406	0.00518711	0.00259355	0.00222305	0.00407558	0.00296406	0.00407558	0.00407558	0.00666914	0.00370508	0.00444609	0.00259355	0.0048166	0.00815117	0.00741015	0.00703964	0.00666914	0.00889218	0.00703964	0.0129678	0.00889218	0.0114857	0.0118562	0.0174139	0.0174139	0.0218599	0.0251945	0.0355687	0.0507595	0.0815117
TCGA-HC-8257	0	0.00684932	0.00684932	0.0136986	0.00684932	0.00342466	0.00684932	0.0171233	0.010274	0.00684932	0.00684932	0.0136986	0.0136986	0.010274	0.00342466	0.010274	0.00684932	0.00342466	0.0136986	0.00684932	0.00342466	0.00684932	0.0171233	0.00684932	0.010274	0.00684932	0.010274	0.00684932	0.0136986	0.00342466	0.010274	0.00684932	0.00684932	0.00684932	0.0171233	0.0239726	0.00342466	0.00684932	0.0205479	0.0239726	0.0239726	0.0205479	0.0616438	0.0273973	0.0308219	0.0376712	0.0753425	0.0650685	0.0753425
TCGA-HC-8258	0.0037037	0.00617284	0.0111111	0.00617284	0.0123457	0.0160494	0.00987654	0.00740741	0.0037037	0.00123457	0.00617284	0.00864198	0.00493827	0.00617284	0.00617284	0.00864198	0.00493827	0.0037037	0.00864198	0.00493827	0.0111111	0.00864198	0.0111111	0.0111111	0.0185185	0.0148148	0.0148148	0.00740741	0.0123457	0.00987654	0.0111111	0.0037037	0.0135802	0.0111111	0.0111111	0.0148148	0.0197531	0.0123457	0.017284	0.0234568	0.0234568	0.017284	0.0234568	0.0234568	0.0382716	0.0382716	0.0395062	0.0481481	0.0666667
TCGA-HC-8259	0.00529101	0.00793651	0.00529101	0.010582	0.010582	0.010582	0.0026455	0.00793651	0.00793651	0.00529101	0.010582	0.00793651	0.010582	0	0.00793651	0.00793651	0.00529101	0.00793651	0.00793651	0.0132275	0.00793651	0.010582	0.0026455	0.00793651	0.026455	0.0026455	0.0185185	0.0185185	0.0132275	0.015873	0.010582	0.00793651	0.021164	0.015873	0.021164	0.015873	0.0291005	0.0238095	0.026455	0.0238095	0.042328	0.021164	0.0291005	0.0291005	0.0449735	0.0634921	0.0608466	0.0449735	0.0846561
TCGA-HC-8260	0.00660066	0.00660066	0.00990099	0.0132013	0.019802	0.00990099	0.00990099	0.0231023	0.019802	0.0165017	0	0.00660066	0.0165017	0.00990099	0.0132013	0.00330033	0.0132013	0.0165017	0	0.00990099	0.00660066	0.0165017	0.039604	0.00660066	0.0231023	0.0132013	0.00330033	0.00660066	0.0132013	0.00660066	0.0231023	0.00660066	0.0231023	0.00660066	0.019802	0.00330033	0.0330033	0.0231023	0.0165017	0.019802	0.0231023	0.0231023	0.0132013	0.029703	0.0264026	0.029703	0.0561056	0.029703	0.049505
TCGA-HC-8261	0.00497512	0.00414594	0.00497512	0.00248756	0.00165837	0.0066335	0.0066335	0.00414594	0.00331675	0.00912106	0.00746269	0.00414594	0.00414594	0.0066335	0.00497512	0.0066335	0.00331675	0.00414594	0.00746269	0.00331675	0.00331675	0.00248756	0.0066335	0.00414594	0.00829187	0.00497512	0.00580431	0.00912106	0.00746269	0.00746269	0.0116086	0.0140962	0.00995025	0.0140962	0.013267	0.00995025	0.0207297	0.0215589	0.0149254	0.0149254	0.0306799	0.0199005	0.0298507	0.0232172	0.0331675	0.0348259	0.0696517	0.0572139	0.112769
TCGA-HC-8262	0.0028169	0.0028169	0.0056338	0.0056338	0.0056338	0.0056338	0.0084507	0.0028169	0	0.0056338	0.0140845	0.0028169	0.0028169	0	0.0056338	0.0112676	0.0084507	0.0169014	0.0056338	0.0056338	0.0140845	0	0.0084507	0.0112676	0.0112676	0.0028169	0.0084507	0.0140845	0.0112676	0.0084507	0.0169014	0.0169014	0.0197183	0.0056338	0.0140845	0.0140845	0.0112676	0.0084507	0.0112676	0.028169	0.028169	0.0169014	0.0394366	0.0394366	0.0338028	0.0478873	0.056338	0.0732394	0.112676
TCGA-HC-8264	0	0.0018622	0.0111732	0.00372439	0.00558659	0.0111732	0.00558659	0.00372439	0.00372439	0.00372439	0.00744879	0.00558659	0.0130354	0.00744879	0.00744879	0.00372439	0.00558659	0.00372439	0.00558659	0.00744879	0.00931099	0.00372439	0.0130354	0.0130354	0.00931099	0.00931099	0.0018622	0.00744879	0.0148976	0.00744879	0.018622	0.0111732	0.0148976	0.0130354	0.0167598	0.027933	0.0242086	0.0130354	0.0242086	0.0297952	0.0335196	0.0372439	0.0260708	0.0391061	0.0670391	0.0614525	0.0856611	0.0689013	0.0968343
TCGA-HC-8265	0	0.00347222	0	0	0.00347222	0	0.0104167	0.00694444	0.0138889	0	0	0.00347222	0.00694444	0	0	0.00694444	0.00347222	0.00347222	0	0.0104167	0.00347222	0.00347222	0	0.0104167	0.00347222	0	0.00347222	0.00347222	0.00347222	0.0138889	0.00694444	0.00694444	0.00694444	0.00347222	0.0104167	0.00347222	0.00694444	0.0138889	0.0208333	0.0138889	0.0208333	0.0138889	0.0243056	0.0381944	0.0347222	0.0451389	0.0694444	0.0868056	0.131944
TCGA-HC-8266	0.00595238	0.0119048	0.00595238	0	0	0.00595238	0.0119048	0.00595238	0.0178571	0.0238095	0.0178571	0.00595238	0.0119048	0.00595238	0.00595238	0.00595238	0.0119048	0.00595238	0.0178571	0.0119048	0.0238095	0.0119048	0.0119048	0.00595238	0.0178571	0.0178571	0.00595238	0.0178571	0.0238095	0.0416667	0.0119048	0.0178571	0.0119048	0.0178571	0.0297619	0.0178571	0.0238095	0.0297619	0.0297619	0.047619	0.0535714	0.0357143	0.0297619	0.0595238	0.0297619	0.0178571	0.0357143	0.0178571	0.0535714
TCGA-HC-A48F	0.0035524	0.0053286	0.0142096	0.0071048	0.0017762	0.0071048	0.0035524	0.0053286	0.0142096	0.0071048	0.0124334	0.00888099	0.00888099	0.00888099	0.0159858	0.0053286	0.0124334	0.0053286	0.0106572	0.0053286	0.0106572	0.0124334	0.0106572	0.0053286	0.0106572	0.017762	0.0159858	0.0142096	0.0230906	0.0071048	0.0213144	0.0195382	0.0248668	0.0213144	0.0142096	0.017762	0.0195382	0.0142096	0.017762	0.0195382	0.0301954	0.0230906	0.0284192	0.0106572	0.0301954	0.044405	0.0515098	0.0497336	0.0728242
TCGA-HC-A4ZV	0.014652	0	0.018315	0.003663	0.00732601	0.010989	0.00732601	0.010989	0.014652	0.010989	0.003663	0.00732601	0.010989	0.003663	0.014652	0.010989	0.00732601	0.014652	0.010989	0.00732601	0.00732601	0.00732601	0.010989	0.00732601	0.00732601	0.010989	0.003663	0.00732601	0.010989	0.003663	0.021978	0.018315	0.025641	0.014652	0.010989	0.00732601	0.029304	0.021978	0.010989	0.00732601	0.03663	0.03663	0.029304	0.03663	0.0549451	0.021978	0.0586081	0.0512821	0.0915751
TCGA-HC-A631	0.00170126	0.00272201	0.00442327	0.00306227	0.00408302	0.00340252	0.00442327	0.00476353	0.00578428	0.00306227	0.00578428	0.00374277	0.00510378	0.00374277	0.00408302	0.00442327	0.00544403	0.00408302	0.00476353	0.00544403	0.00544403	0.00510378	0.00442327	0.00408302	0.00816604	0.00680504	0.00612453	0.00952705	0.00850629	0.00544403	0.0112283	0.0105478	0.0129296	0.0142906	0.00884655	0.0159918	0.0149711	0.0098673	0.0248384	0.0204151	0.0241579	0.0248384	0.0353862	0.04049	0.0466145	0.0547805	0.09459	0.0925485	0.138482
TCGA-HC-A632	0.0020284	0.00608519	0.00608519	0.00608519	0.00608519	0.0040568	0.0020284	0.0121704	0.0020284	0.00811359	0.0040568	0.0020284	0.00608519	0.010142	0.00608519	0.0020284	0.00811359	0.0040568	0.0040568	0.00608519	0.00811359	0.0040568	0.0121704	0.010142	0.0141988	0.010142	0.00608519	0.00608519	0.00811359	0.0040568	0.010142	0.010142	0.00811359	0.0121704	0.0121704	0.0162272	0.0162272	0.0121704	0.0182556	0.0182556	0.0182556	0.0182556	0.040568	0.0507099	0.0324544	0.0730223	0.0973631	0.0973631	0.119675
TCGA-HC-A6AL	0.00238095	0.00119048	0.00833333	0.00238095	0.00714286	0.00238095	0.00595238	0.00357143	0.00357143	0.00357143	0.00357143	0.00119048	0.00595238	0.0047619	0.00357143	0.00238095	0.0047619	0.00238095	0.00119048	0.00595238	0.00714286	0.0047619	0.00238095	0.00357143	0.00952381	0.0047619	0.00595238	0.00595238	0.0130952	0.00238095	0.00595238	0.0107143	0.0154762	0.00595238	0.0130952	0.0190476	0.0214286	0.025	0.0178571	0.0154762	0.0202381	0.0321429	0.0357143	0.0285714	0.0380952	0.05	0.0559524	0.0738095	0.0869048
TCGA-HC-A6AN	0.00228311	0.00489237	0.00293542	0.00424005	0.00293542	0.00489237	0.00554468	0.00358774	0.00456621	0.00260926	0.00456621	0.00326158	0.00391389	0.00587084	0.00391389	0.00521853	0.00456621	0.00293542	0.00489237	0.00489237	0.00456621	0.00326158	0.00521853	0.00652316	0.00587084	0.00489237	0.00815395	0.00880626	0.00880626	0.00652316	0.00978474	0.00717547	0.0136986	0.0104371	0.0143509	0.0146771	0.0163079	0.0159817	0.0136986	0.0143509	0.024788	0.0221787	0.0296804	0.0264188	0.047619	0.0482714	0.0772994	0.0763209	0.0945858
TCGA-HC-A6AO	0.00271739	0.00815217	0.0108696	0.00815217	0.00815217	0.00543478	0.00543478	0.00543478	0.00815217	0.00271739	0.013587	0.00543478	0.00543478	0.0190217	0.0217391	0.00271739	0.00815217	0.00815217	0.00815217	0.0190217	0.0244565	0.00543478	0.00543478	0.0163043	0.00543478	0.0163043	0.0190217	0.0108696	0.0108696	0.00543478	0.0271739	0.0190217	0.0244565	0.0163043	0.0163043	0.013587	0.00815217	0.0298913	0.0163043	0.0163043	0.0353261	0.0190217	0.0326087	0.0190217	0.0380435	0.0407609	0.0516304	0.0434783	0.076087
TCGA-HC-A6AP	0.003125	0.00625	0.0078125	0.00234375	0.00390625	0.003125	0.003125	0.0046875	0.0046875	0.003125	0.00546875	0.00234375	0.0046875	0.00234375	0.00078125	0.003125	0.00390625	0.0078125	0.00859375	0.00546875	0.00546875	0.00234375	0.00703125	0.00390625	0.00703125	0.00234375	0.00625	0.00625	0.00859375	0.00546875	0.00625	0.0078125	0.0078125	0.00859375	0.0140625	0.0125	0.0132812	0.0242188	0.0164063	0.01875	0.0335937	0.0242188	0.0429688	0.0484375	0.0585938	0.0578125	0.115625	0.107031	0.132812
TCGA-HC-A6AQ	0.00296736	0.00296736	0.00296736	0.00593472	0	0.0118694	0.0178042	0.00296736	0	0.00296736	0.00593472	0	0.0118694	0.00593472	0.0118694	0.0118694	0.00593472	0.00296736	0.00296736	0.00296736	0.00296736	0.00593472	0.00593472	0.00593472	0.00890208	0.00593472	0.0118694	0.0148368	0.0178042	0.0118694	0.0267062	0.00890208	0.0118694	0.0207715	0.0267062	0.00890208	0.0118694	0.0178042	0.0178042	0.00890208	0.0296736	0.0385757	0.0445104	0.0563798	0.0445104	0.0474777	0.0830861	0.0623145	0.106825
TCGA-HC-A6AS	0.00330033	0.00660066	0.00660066	0.00330033	0.0132013	0.00660066	0.00330033	0.0165017	0.00990099	0.00990099	0.0165017	0.019802	0.0132013	0.0231023	0.00660066	0.019802	0.019802	0.0132013	0.00990099	0.00990099	0.00660066	0.00990099	0.0132013	0.0132013	0.019802	0.0264026	0.029703	0.0132013	0.00330033	0.00660066	0.0165017	0.00330033	0.019802	0.0165017	0.00660066	0.0132013	0.0429043	0.0330033	0.019802	0.0462046	0.0363036	0.00990099	0.0363036	0.0330033	0.0660066	0.0330033	0.0363036	0.049505	0.0429043
TCGA-HC-A6HX	0	0.0142857	0.0142857	0	0.0238095	0.0238095	0.00952381	0.0142857	0.0190476	0.00952381	0.0047619	0.00952381	0.0238095	0.00952381	0.0047619	0.00952381	0.00952381	0.0047619	0.0190476	0.00952381	0.0190476	0.0190476	0.00952381	0.0142857	0.0142857	0.00952381	0.0047619	0.0142857	0.00952381	0.0142857	0.0190476	0.0047619	0.0142857	0.0047619	0.00952381	0.0333333	0.0238095	0.00952381	0.0428571	0.0428571	0.052381	0.0142857	0.0190476	0.0333333	0.0380952	0.047619	0.052381	0.0428571	0.0619048
TCGA-HC-A6HY	0	0.00833333	0.00833333	0.00833333	0.0166667	0.00833333	0.0166667	0.025	0.025	0.025	0.0166667	0.0166667	0.00833333	0.0166667	0.0166667	0.00833333	0.00833333	0.0333333	0.00833333	0.00833333	0.0166667	0.00833333	0.00833333	0.00833333	0.025	0	0.0166667	0.00833333	0.0166667	0.00833333	0.025	0.0166667	0.025	0.0333333	0.00833333	0.0416667	0.00833333	0.00833333	0.025	0	0.0166667	0.0166667	0	0.0166667	0.05	0.00833333	0.025	0.05	0.0583333
TCGA-HC-A76W	0.00203666	0.01222	0.0142566	0.01222	0.0101833	0.00407332	0.0264766	0.00610998	0.0142566	0.00610998	0.00814664	0.0203666	0.00610998	0.0203666	0.01222	0.0183299	0.0162933	0.01222	0.0244399	0.0162933	0.0101833	0.0244399	0.00610998	0.00610998	0.0224033	0.01222	0.0386965	0.01222	0.0162933	0.0203666	0.0183299	0.0142566	0.0285132	0.0142566	0.0224033	0.0203666	0.0183299	0.0244399	0.0224033	0.0244399	0.0305499	0.0346232	0.0264766	0.0183299	0.0285132	0.0264766	0.0325866	0.0366599	0.0407332
TCGA-HC-A76X	0.00224719	0.011236	0.00224719	0.0134831	0.00449438	0.00224719	0.0134831	0.0134831	0.00449438	0.00898876	0.011236	0.0134831	0.00674157	0.00898876	0.00898876	0.00898876	0.00674157	0.0224719	0.00449438	0.00674157	0.011236	0.011236	0.0179775	0.00898876	0.00674157	0.00674157	0.0179775	0.0157303	0.0134831	0.00898876	0.0292135	0.0134831	0.0224719	0.0179775	0.0292135	0.0202247	0.0202247	0.0134831	0.0134831	0.0314607	0.0314607	0.0337079	0.0382022	0.047191	0.0426966	0.0359551	0.0629213	0.0382022	0.0696629
TCGA-HC-A8CY	0.00810185	0.0196759	0.0196759	0.0150463	0.00925926	0.00810185	0.00347222	0.0185185	0.0115741	0.00578704	0.0185185	0.0150463	0.0185185	0.0173611	0.0115741	0.0127315	0.0115741	0.0104167	0.0138889	0.0173611	0.0127315	0.0138889	0.0150463	0.00925926	0.0185185	0.0127315	0.0138889	0.0104167	0.0150463	0.0138889	0.0104167	0.0104167	0.0289352	0.0162037	0.0196759	0.0162037	0.0266204	0.0277778	0.0185185	0.0196759	0.03125	0.0243056	0.0347222	0.025463	0.0451389	0.037037	0.0405093	0.0289352	0.0578704
TCGA-HC-A8D0	0.00088968	0.00800712	0.00978648	0.00533808	0.0044484	0.0088968	0.00622776	0.0044484	0.00355872	0.00711744	0.0044484	0.00533808	0.0124555	0.00266904	0.0088968	0.0115658	0.0106762	0.0088968	0.0124555	0.0088968	0.0088968	0.00355872	0.00533808	0.00800712	0.0169039	0.0088968	0.0160142	0.0124555	0.0169039	0.0151246	0.0169039	0.0151246	0.0124555	0.0177936	0.0213523	0.0151246	0.019573	0.022242	0.0302491	0.019573	0.0382562	0.0275801	0.0489324	0.0346975	0.0578292	0.0507117	0.0676157	0.0702847	0.0720641
TCGA-HC-A8D1	0	0	0.00813008	0	0	0.00406504	0.00406504	0.00813008	0.00406504	0	0.00813008	0.00406504	0	0.0162602	0.0121951	0.00406504	0.0121951	0	0	0.0243902	0.00406504	0	0.00813008	0.00813008	0.0121951	0.00406504	0.0203252	0.00406504	0.00406504	0.00406504	0.00813008	0.0243902	0.0121951	0.0203252	0.0203252	0.0284553	0.0203252	0.0162602	0.0325203	0.0528455	0.0447154	0.0569106	0.0365854	0.0528455	0.0894309	0.0731707	0.0731707	0.0772358	0.0406504
TCGA-HC-A9TE	0.00682594	0.00341297	0.0170648	0.00682594	0.0102389	0.00682594	0.00341297	0.0102389	0.0102389	0.0102389	0.0102389	0.0102389	0.0102389	0.00341297	0.00682594	0.0102389	0.0102389	0.00341297	0.0136519	0.00682594	0.0136519	0.0204778	0.00682594	0	0.0136519	0.0102389	0.0238908	0.0170648	0.0170648	0.0238908	0.0170648	0.0170648	0.0307167	0.0238908	0.0238908	0.0170648	0.0307167	0.0341297	0.0273038	0.0273038	0.0238908	0.0375427	0.0477816	0.0341297	0.0273038	0.0375427	0.0614334	0.0477816	0.0546075
TCGA-HC-A9TH	0.0051458	0.00857633	0.0188679	0.0102916	0.00857633	0.00343053	0.0102916	0.00857633	0.0137221	0.0102916	0.0154374	0.0102916	0.0102916	0.0137221	0.0137221	0.00857633	0.0154374	0.0051458	0.0120069	0.0102916	0.0205832	0.0051458	0.0222985	0.0154374	0.0205832	0.0120069	0.0137221	0.00686106	0.0154374	0.0222985	0.0154374	0.0205832	0.0291595	0.0154374	0.0188679	0.0154374	0.025729	0.0291595	0.0360206	0.025729	0.0394511	0.0360206	0.0325901	0.0360206	0.0668954	0.0343053	0.0343053	0.0411664	0.0240137
TCGA-HI-7168	0.00292969	0.00292969	0.00878906	0.00585938	0.00683594	0.00683594	0.0078125	0.00585938	0.000976562	0.00390625	0.00292969	0.0078125	0.00390625	0.00683594	0.0117188	0.00390625	0.00585938	0.00390625	0.00585938	0.00195312	0.0107422	0.00390625	0.00292969	0.00976562	0.00976562	0.00585938	0.000976562	0.00488281	0.00585938	0.00683594	0.0078125	0.0078125	0.00585938	0.00292969	0.0205078	0.0078125	0.0146484	0.00585938	0.00683594	0.00878906	0.0146484	0.00488281	0.0224609	0.0185547	0.0224609	0.0166016	0.0429688	0.046875	0.116211
TCGA-HI-7169	0.00262123	0.00524246	0.00262123	0.00262123	0.00655308	0.00655308	0.00393185	0.00655308	0.00131062	0.0078637	0.00655308	0.00524246	0.00917431	0.00262123	0.0117955	0.00524246	0.00131062	0.00524246	0.00917431	0.00393185	0.00655308	0.00262123	0.00524246	0.00393185	0.00655308	0.00524246	0.00524246	0.00655308	0.00655308	0.0078637	0.0104849	0.0104849	0.00917431	0.0078637	0.0117955	0.00917431	0.0144168	0.017038	0.00917431	0.0131062	0.0157274	0.017038	0.0222805	0.0288336	0.0262123	0.0301442	0.0366972	0.0498034	0.08519
TCGA-HI-7170	0.0038961	0.00649351	0.0012987	0.00519481	0.0038961	0.0012987	0.0038961	0.00649351	0.00519481	0.00779221	0.0038961	0.0038961	0.0038961	0.0012987	0.00649351	0.00519481	0.0103896	0.0038961	0.00909091	0.0025974	0.0103896	0.00909091	0.00909091	0.012987	0.00519481	0.00779221	0.0038961	0.00519481	0.012987	0.0038961	0.0038961	0.0116883	0.0207792	0.012987	0.00519481	0.00909091	0.0103896	0.012987	0.0116883	0.0103896	0.0311688	0.0207792	0.0272727	0.0220779	0.0493506	0.0376623	0.0597403	0.0519481	0.11039
TCGA-HI-7171	0.00171821	0.00257732	0.00601375	0.00257732	0.00515464	0.00515464	0.00429553	0.00429553	0.00773196	0.00687285	0.00601375	0.00515464	0.00515464	0.00515464	0.0103093	0.00859107	0.00773196	0.0103093	0.00601375	0.00601375	0.0111684	0.00601375	0.0111684	0.00687285	0.0111684	0.00773196	0.00515464	0.00429553	0.0103093	0.00687285	0.0128866	0.00945017	0.0111684	0.0111684	0.0146048	0.0120275	0.0197595	0.0146048	0.0154639	0.00859107	0.0231959	0.0197595	0.0300687	0.0352234	0.0429553	0.0438144	0.0558419	0.0678694	0.104811
TCGA-J4-8198	0.0049456	0.00791296	0.0098912	0.00949555	0.00850643	0.00652819	0.0124629	0.0090999	0.0102868	0.00613254	0.00791296	0.00712166	0.0126607	0.00830861	0.0090999	0.00771513	0.010089	0.00633037	0.010089	0.00712166	0.0098912	0.0104847	0.0102868	0.0126607	0.00969337	0.0122651	0.0140455	0.0122651	0.013452	0.0106825	0.0189911	0.0136499	0.0158259	0.0122651	0.0174085	0.016815	0.0183976	0.0158259	0.0227498	0.0205737	0.0233432	0.0221563	0.0282888	0.023541	0.0336301	0.0334322	0.0441147	0.0423343	0.0605341
TCGA-J4-8200	0.00196502	0.00255453	0.00373354	0.00216152	0.00353704	0.00334054	0.00412655	0.00137552	0.00353704	0.00117901	0.00373354	0.00353704	0.00373354	0.00373354	0.00353704	0.00157202	0.00353704	0.00255453	0.00373354	0.00334054	0.00550206	0.00530556	0.00412655	0.00451955	0.00569857	0.00353704	0.00550206	0.00314404	0.00707408	0.00432305	0.00786009	0.00825309	0.00982511	0.00825309	0.00766359	0.00962861	0.0133622	0.0123796	0.0165062	0.0145412	0.0168992	0.0149342	0.0241698	0.0279033	0.043427	0.0455885	0.0595402	0.0742779	0.127333
TCGA-J4-A67K	0.00182456	0.00238596	0.00238596	0.00449123	0.00378947	0.00364912	0.00533333	0.00322807	0.00421053	0.00308772	0.00378947	0.00350877	0.00378947	0.00252632	0.00364912	0.00364912	0.00477193	0.00266667	0.00336842	0.00392982	0.00364912	0.00308772	0.00421053	0.00449123	0.00547368	0.00435088	0.00589474	0.00364912	0.00561404	0.00519298	0.00631579	0.00463158	0.00870175	0.00757895	0.0085614	0.00926316	0.00898246	0.0109474	0.0144561	0.0117895	0.0179649	0.013193	0.0221754	0.0232982	0.0314386	0.0324211	0.0474386	0.0579649	0.114526
TCGA-J4-A67L	0.00183685	0.00308925	0.00367371	0.00325624	0.00283877	0.00325624	0.00367371	0.00333973	0.00325624	0.00292227	0.00409117	0.00225432	0.00392419	0.00417467	0.00342323	0.00267179	0.00367371	0.00417467	0.00409117	0.00400768	0.0037572	0.00325624	0.00333973	0.00333973	0.00442515	0.00233781	0.00484262	0.00267179	0.00526008	0.00392419	0.00559406	0.00409117	0.00542707	0.00534358	0.00667947	0.00617851	0.00776488	0.00801536	0.00985222	0.00684646	0.012524	0.0112716	0.0149453	0.0172831	0.0236286	0.0273858	0.0398263	0.0531853	0.115722
TCGA-J4-A67M	0.00448934	0.00516274	0.00493827	0.0047138	0.00516274	0.00538721	0.00448934	0.00606061	0.00561167	0.00650954	0.00426487	0.00493827	0.00493827	0.00246914	0.00538721	0.0047138	0.00561167	0.0047138	0.00448934	0.00561167	0.00538721	0.00650954	0.00628507	0.00493827	0.00583614	0.00538721	0.00897868	0.00718294	0.00875421	0.00673401	0.00897868	0.00695847	0.00763187	0.00808081	0.0112233	0.00740741	0.0132435	0.0103255	0.0130191	0.00920314	0.0105499	0.0118967	0.0181818	0.013468	0.0208754	0.0217733	0.030752	0.0410774	0.0945006
TCGA-J4-A67N	0.00114698	0.00262166	0.00262166	0.00344093	0.00327708	0.00278552	0.00360478	0.00245781	0.00507947	0.00180239	0.00409635	0.00278552	0.00442405	0.00327708	0.00376864	0.00344093	0.00393249	0.0021301	0.00409635	0.00491562	0.00344093	0.00360478	0.00475176	0.00294937	0.00540718	0.00327708	0.00507947	0.00688186	0.00622645	0.00540718	0.00606259	0.00507947	0.00688186	0.0063903	0.00884811	0.00606259	0.0085204	0.00573488	0.00868425	0.0124529	0.0121252	0.0117975	0.0198263	0.0185155	0.0267082	0.028019	0.0407996	0.0466983	0.0932328
TCGA-J4-A67Q	0.00152775	0.00254626	0.00390426	0.00186726	0.00254626	0.00288576	0.00305551	0.00203701	0.00305551	0.0016975	0.00288576	0.00203701	0.00373451	0.00237651	0.00254626	0.0016975	0.00305551	0.00254626	0.00390426	0.00186726	0.00509251	0.00271601	0.00373451	0.00356476	0.00475301	0.00373451	0.00645052	0.00322526	0.00424376	0.00339501	0.00543201	0.00662027	0.00695977	0.00695977	0.00763877	0.00628077	0.010185	0.00848752	0.010864	0.0110338	0.0174843	0.0140893	0.0200306	0.0212188	0.0280088	0.0366661	0.0536411	0.0614497	0.120014
TCGA-J4-A67R	0.00110686	0.0042262	0.00472932	0.00432683	0.00291809	0.0046287	0.00311934	0.00362246	0.00382371	0.00362246	0.00352184	0.00402495	0.00402495	0.00332059	0.0046287	0.0046287	0.00513182	0.00472932	0.00503119	0.0046287	0.00563494	0.00301872	0.00503119	0.00493057	0.00623868	0.00513182	0.0063393	0.00734554	0.00774804	0.00784866	0.00865365	0.00714429	0.0100624	0.00835178	0.012578	0.010163	0.0139867	0.00965989	0.0171061	0.0142886	0.0209298	0.0191185	0.0269672	0.0239485	0.034514	0.0356208	0.0526263	0.0609781	0.114912
TCGA-J4-A67S	0.000980255	0.00266069	0.00224058	0.00252066	0.0030808	0.00238062	0.00322084	0.00252066	0.00336087	0.00182047	0.00336087	0.00182047	0.00280073	0.00238062	0.00378098	0.00322084	0.00434113	0.00182047	0.00434113	0.00364095	0.00350091	0.00252066	0.00504131	0.00420109	0.00448117	0.00434113	0.00532138	0.00476124	0.00574149	0.00518135	0.00588153	0.00546142	0.00644167	0.00630164	0.00868226	0.00658171	0.00896233	0.00840218	0.011623	0.0102227	0.0149839	0.0141437	0.0211455	0.0198852	0.0249265	0.0281473	0.0544742	0.0490127	0.109088
TCGA-J4-A67T	0.00123487	0.000740924	0.00370462	0.00123487	0.00296369	0.00123487	0.00222277	0.00246975	0.00271672	0.00222277	0.00148185	0.0019758	0.00345764	0.00148185	0.00271672	0.000740924	0.00246975	0.0019758	0.00246975	0.00172882	0.00123487	0.00172882	0.00321067	0.00321067	0.00271672	0.00246975	0.00395159	0.00321067	0.00148185	0.00296369	0.00469252	0.00321067	0.00444554	0.00395159	0.00469252	0.00419857	0.00716226	0.00716226	0.00864411	0.00987898	0.0133366	0.0108669	0.0153124	0.0148185	0.0244505	0.0239565	0.0424796	0.0521116	0.117066
TCGA-J4-A6G1	0.00264389	0.00305064	0.00284726	0.00406752	0.00325402	0.00447427	0.00467765	0.00305064	0.00589791	0.00386414	0.00447427	0.00183038	0.00366077	0.00488103	0.00549115	0.00406752	0.0042709	0.00488103	0.0042709	0.00345739	0.00630466	0.00447427	0.00589791	0.00305064	0.00650803	0.00284726	0.00854179	0.00467765	0.0093553	0.00752491	0.00894855	0.00650803	0.0105756	0.00732154	0.0107789	0.00894855	0.0140329	0.0124059	0.0152532	0.0170836	0.0193207	0.0166768	0.0225747	0.025422	0.0423022	0.0392516	0.0589791	0.0744356	0.115314
TCGA-J4-A6G3	0.0043986	0.0075838	0.00773548	0.00485363	0.00546034	0.00712877	0.00621872	0.00561201	0.00834218	0.00561201	0.00637039	0.00637039	0.00773548	0.00621872	0.00788715	0.00637039	0.00682542	0.00743212	0.00894889	0.00606704	0.00985894	0.00803883	0.00637039	0.00591536	0.010314	0.00743212	0.00940391	0.00940391	0.0106173	0.00849386	0.0124374	0.0116791	0.0136508	0.0141059	0.0118307	0.0141059	0.0162293	0.0144092	0.0177461	0.0200212	0.0204763	0.0189595	0.0254816	0.0242682	0.0335204	0.0354922	0.0444411	0.0544517	0.0876687
TCGA-J4-A6M7	0.000684229	0.00410537	0.00273691	0.00273691	0.00410537	0.00547383	0.00752651	0.0047896	0.00410537	0.00307903	0.00444749	0.00581594	0.00547383	0.00444749	0.00513171	0.0023948	0.0047896	0.00444749	0.00684229	0.00547383	0.00615806	0.00342114	0.00855286	0.00513171	0.00513171	0.0106055	0.00786863	0.00684229	0.011974	0.0071844	0.0123161	0.00752651	0.0130003	0.00821074	0.0133425	0.011974	0.0123161	0.0102634	0.0205269	0.015053	0.0198426	0.0191584	0.0348957	0.0307903	0.0352378	0.0413958	0.0673965	0.0759494	0.102634
TCGA-J4-A83I	0.00125203	0.00262927	0.00438212	0.00300488	0.00325529	0.00225366	0.0037561	0.00237887	0.00275448	0.00200326	0.0035057	0.00325529	0.00300488	0.00287968	0.00400651	0.00313009	0.00275448	0.00275448	0.00212846	0.00300488	0.00212846	0.00250407	0.0037561	0.00388131	0.00388131	0.00287968	0.00450732	0.00325529	0.00400651	0.00262927	0.00500814	0.00262927	0.00550895	0.0036309	0.00488293	0.00400651	0.00626017	0.00500814	0.00638538	0.00663578	0.00813822	0.0071366	0.007387	0.0108927	0.0174033	0.0164017	0.0279204	0.0302992	0.0637286
TCGA-J4-A83J	0.00391042	0.00515464	0.0069321	0.00515464	0.00426591	0.00586562	0.00479915	0.00604337	0.00604337	0.00497689	0.00533239	0.0046214	0.00622112	0.00657661	0.00639886	0.00515464	0.00604337	0.0046214	0.00586562	0.00551013	0.00551013	0.00479915	0.00710985	0.00515464	0.00764309	0.00675435	0.00728759	0.00497689	0.00853182	0.00551013	0.00959829	0.00657661	0.00870956	0.00551013	0.00906506	0.00746534	0.00959829	0.00799858	0.0122645	0.0106648	0.01262	0.0138642	0.0191966	0.0159972	0.0218628	0.0255954	0.0431923	0.0533239	0.102382
TCGA-J4-A83K	0.00367647	0.00220588	0.00294118	0.00110294	0.00257353	0.00551471	0.00330882	0.00441176	0.00294118	0.00441176	0.00257353	0.00330882	0.00330882	0.00625	0.00625	0.00147059	0.00404412	0.00330882	0.00661765	0.00367647	0.00441176	0.00330882	0.00661765	0.00441176	0.00514706	0.00477941	0.00808824	0.00588235	0.00698529	0.00808824	0.00955882	0.00551471	0.00772059	0.00845588	0.00919118	0.00661765	0.00882353	0.0113971	0.0117647	0.0125	0.0150735	0.0154412	0.0220588	0.0238971	0.0290441	0.0356618	0.0488971	0.0636029	0.102941
TCGA-J4-A83L	0.000189681	0.000758725	0.000948407	0.000189681	0.00113809	0.000189681	0.00113809	0.00132777	0.000948407	0.000379363	0.00132777	0.00132777	0.00246586	0.000758725	0.00132777	0.000758725	0.00113809	0.000948407	0.00151745	0.000948407	0.000948407	0.000948407	0.00151745	0.000948407	0.00113809	0.00170713	0.000758725	0.00113809	0.00189681	0.0030349	0.00246586	0.00246586	0.00417299	0.00265554	0.00322458	0.00341426	0.00455235	0.00436267	0.00550076	0.00701821	0.00891502	0.00891502	0.0153642	0.0117602	0.0218134	0.0231411	0.038695	0.0440061	0.119879
TCGA-J4-A83M	0.00208117	0.00485605	0.00450919	0.00346861	0.00450919	0.00346861	0.00381547	0.0062435	0.00450919	0.00312175	0.00520291	0.00450919	0.00450919	0.00520291	0.0062435	0.00277489	0.00520291	0.00416233	0.00312175	0.0062435	0.00589664	0.00450919	0.00693722	0.00589664	0.00693722	0.00589664	0.00763094	0.00485605	0.00901838	0.00659036	0.00971211	0.00554977	0.00971211	0.00971211	0.00971211	0.00832466	0.0128339	0.00971211	0.0128339	0.014915	0.0180368	0.0169962	0.0246271	0.0260146	0.0332986	0.0339924	0.0492542	0.0475199	0.121748
TCGA-J4-A83N	0.000667223	0.00200167	0.0030025	0.00133445	0.000834028	0.00216847	0.00183486	0.00166806	0.00200167	0.00133445	0.00216847	0.00183486	0.00133445	0.00133445	0.00266889	0.00216847	0.00216847	0.00200167	0.00216847	0.00233528	0.00266889	0.00250209	0.00250209	0.00183486	0.0030025	0.00233528	0.00550459	0.00250209	0.00333611	0.00383653	0.00483736	0.00250209	0.00517098	0.00383653	0.00433695	0.00366972	0.00683903	0.00633862	0.00767306	0.00834028	0.0100083	0.00850709	0.0113428	0.0153461	0.0235196	0.0245204	0.0361968	0.0473728	0.0902419
TCGA-J4-AATV	0.00108696	0.0023913	0.00478261	0.00304348	0.0026087	0.00217391	0.0026087	0.00326087	0.00173913	0.0026087	0.00304348	0.00326087	0.00326087	0.00282609	0.00369565	0.0023913	0.00413043	0.00217391	0.00434783	0.00282609	0.00543478	0.005	0.00717391	0.00456522	0.00608696	0.00478261	0.00608696	0.00521739	0.00521739	0.005	0.00652174	0.00630435	0.00956522	0.00652174	0.00934783	0.00652174	0.0106522	0.0076087	0.0115217	0.01	0.0169565	0.0143478	0.0195652	0.0191304	0.0315217	0.0291304	0.0541304	0.0547826	0.106304
TCGA-J4-AATZ	0.00218878	0.00164159	0.00355677	0.00136799	0.00191518	0.00136799	0.00109439	0.00273598	0.00246238	0.00191518	0.00109439	0.00300958	0.00246238	0.00164159	0.00328317	0.00164159	0.00273598	0.00410397	0.00355677	0.00191518	0.00300958	0.00164159	0.00519836	0.00300958	0.00492476	0.00164159	0.00629275	0.00273598	0.00547196	0.00547196	0.00519836	0.00410397	0.00629275	0.00355677	0.00738714	0.00766074	0.00820793	0.00957592	0.0120383	0.0139535	0.0150479	0.0147743	0.0194254	0.022435	0.0352941	0.0361149	0.0536252	0.0659371	0.130233
TCGA-J4-AAU2	0.000467836	0.000701754	0.000935673	0.000701754	0.000935673	0.000935673	0.00116959	0.000233918	0.000935673	0.000233918	0.00140351	0.00140351	0.00116959	0.000467836	0.00140351	0.00140351	0.00163743	0.000935673	0.00187135	0.000467836	0.00140351	0.00140351	0.00327485	0.00163743	0.00187135	0.00140351	0.00210526	0.00187135	0.00187135	0.00210526	0.00163743	0.00210526	0.00327485	0.00280702	0.00233918	0.00327485	0.00491228	0.00467836	0.00444444	0.00538012	0.0100585	0.00795322	0.014269	0.0121637	0.0236257	0.0252632	0.0444444	0.0594152	0.11883
TCGA-KK-A59V	0.00152246	0.00456737	0.0035524	0.0017762	0.00329866	0.00405988	0.00507485	0.00405988	0.00405988	0.00329866	0.00456737	0.0035524	0.00405988	0.00126871	0.00456737	0.0035524	0.00380614	0.00608982	0.00507485	0.00405988	0.00558234	0.00380614	0.00583608	0.00405988	0.00558234	0.00482111	0.0114184	0.00761228	0.00964222	0.00583608	0.0106572	0.00685105	0.0071048	0.00811977	0.0111647	0.00938848	0.0170008	0.0126871	0.0182695	0.0180157	0.024613	0.0220756	0.0309566	0.0279117	0.0400913	0.0449125	0.0659731	0.0654656	0.114692
TCGA-KK-A59X	0.00314589	0.00668502	0.0086512	0.00786473	0.00904444	0.00688164	0.00924105	0.00570193	0.00511207	0.00629178	0.00688164	0.00707825	0.00825796	0.00688164	0.00904444	0.00530869	0.0100275	0.00727487	0.0106174	0.00727487	0.010814	0.0086512	0.0110106	0.00845458	0.0114039	0.00786473	0.0102241	0.00943767	0.00943767	0.00806134	0.0104208	0.0127802	0.0145497	0.0116005	0.0159261	0.0145497	0.017499	0.0145497	0.0212348	0.017499	0.0251671	0.019072	0.0320488	0.0202517	0.0393236	0.0342116	0.0509241	0.0511207	0.0821864
TCGA-KK-A59Y	0.00312323	0.0048268	0.00908575	0.0048268	0.00198751	0.00596252	0.00397501	0.00340716	0.00539466	0.0048268	0.00795003	0.00227144	0.00653038	0.00539466	0.00795003	0.00454287	0.00624645	0.00596252	0.00738217	0.00539466	0.00681431	0.00567859	0.00681431	0.00795003	0.00823396	0.00567859	0.00851789	0.00596252	0.0076661	0.00851789	0.0127768	0.011925	0.0153322	0.011925	0.0150483	0.0116411	0.0193072	0.0144804	0.0227144	0.0218626	0.028109	0.0272572	0.0346394	0.0306644	0.048268	0.0454287	0.068427	0.0749574	0.0951164
TCGA-KK-A59Z	0.00209534	0.00104767	0.00209534	0.00235726	0.00340492	0.00261917	0.00340492	0.000785752	0.00366684	0.00235726	0.00235726	0.00130959	0.00340492	0.00235726	0.00288109	0.00314301	0.00392876	0.00471451	0.00314301	0.00235726	0.00419068	0.00550026	0.00497643	0.00288109	0.00392876	0.00288109	0.00445259	0.00366684	0.00523834	0.00445259	0.00550026	0.00366684	0.00785752	0.00550026	0.00680985	0.00628601	0.0091671	0.00628601	0.0091671	0.00680985	0.0136197	0.0112624	0.0185961	0.0162389	0.0343112	0.031692	0.0432163	0.0531692	0.107386
TCGA-KK-A5A1	0.00371353	0.00424403	0.00424403	0.00424403	0.00291777	0.00583554	0.00583554	0.00450928	0.00557029	0.00557029	0.00424403	0.00583554	0.00557029	0.00503979	0.00742706	0.00424403	0.0071618	0.00503979	0.00769231	0.0061008	0.00769231	0.00530504	0.00530504	0.00557029	0.00769231	0.0061008	0.00981432	0.00875332	0.00742706	0.00795756	0.0124668	0.00795756	0.0124668	0.0137931	0.0137931	0.0124668	0.0172414	0.0127321	0.0241379	0.0167109	0.0230769	0.0204244	0.0286472	0.0265252	0.0432361	0.038992	0.0615385	0.0649867	0.104775
TCGA-KK-A6DY	0.00299307	0.00488343	0.00456837	0.00582861	0.00677379	0.00488343	0.00551355	0.00441084	0.00425331	0.00362319	0.00598614	0.0047259	0.00771897	0.00582861	0.00693132	0.0047259	0.00598614	0.00614367	0.00677379	0.00771897	0.00834909	0.00771897	0.00834909	0.00677379	0.00771897	0.00708885	0.00834909	0.00960933	0.0114997	0.00882168	0.0118147	0.00992439	0.0124449	0.010712	0.010712	0.00976686	0.0135476	0.0124449	0.0152804	0.0126024	0.0225268	0.0159105	0.0250473	0.023472	0.0311909	0.0293006	0.044581	0.0516698	0.0874291
TCGA-KK-A6E0	0.00276799	0.00578762	0.00603926	0.00327126	0.00679416	0.00452944	0.0070458	0.00251636	0.00452944	0.00578762	0.00654253	0.00377453	0.00754907	0.00427781	0.00553598	0.00528435	0.00603926	0.00427781	0.0070458	0.00553598	0.00830398	0.00553598	0.00578762	0.00805234	0.00931052	0.0070458	0.00981379	0.0078007	0.00754907	0.00629089	0.0108203	0.0103171	0.0118269	0.0118269	0.0108203	0.0133367	0.0145949	0.0145949	0.0228988	0.018621	0.0201309	0.0193759	0.029693	0.0276799	0.0405133	0.0362355	0.0518369	0.0583795	0.0931052
TCGA-KK-A6E3	0.00161316	0.00371028	0.00516212	0.00371028	0.00435554	0.00467817	0.00564607	0.00451686	0.00371028	0.00532344	0.0069366	0.00532344	0.00403291	0.00613002	0.00725924	0.00467817	0.00500081	0.00500081	0.00500081	0.00483949	0.00742055	0.00564607	0.00613002	0.00467817	0.00532344	0.00645265	0.00709792	0.00645265	0.00838845	0.00709792	0.0079045	0.00871108	0.0100016	0.0088724	0.0117761	0.0104856	0.0146798	0.0120987	0.0159703	0.0111308	0.0169382	0.0174222	0.0191966	0.0221003	0.028069	0.0266172	0.037748	0.0472657	0.0909824
TCGA-KK-A6E4	0.00114416	0.00286041	0.00247902	0.00209764	0.00247902	0.00152555	0.00228833	0.00133486	0.00228833	0.00286041	0.00381388	0.00133486	0.0032418	0.00171625	0.00190694	0.00152555	0.00228833	0.00305111	0.00305111	0.00228833	0.00514874	0.00419527	0.00228833	0.00305111	0.00457666	0.0032418	0.00476735	0.00476735	0.00286041	0.00438596	0.00572082	0.00743707	0.00724638	0.00686499	0.0097254	0.00896262	0.011251	0.00858124	0.0116323	0.0122044	0.0165904	0.0120137	0.0202136	0.016209	0.0329901	0.0314645	0.0526316	0.0553013	0.0980168
TCGA-KK-A6E5	0.00326597	0.00510308	0.00632782	0.00489896	0.00510308	0.00571545	0.00591958	0.00510308	0.00387834	0.00428659	0.00632782	0.00571545	0.00551133	0.00428659	0.00653195	0.00449071	0.0061237	0.00469484	0.00510308	0.00489896	0.00489896	0.00653195	0.00571545	0.00632782	0.00734844	0.00775669	0.0061237	0.00836905	0.010002	0.0087773	0.00959379	0.00653195	0.0106144	0.00898142	0.0151051	0.0106144	0.0138804	0.0118392	0.0175546	0.016534	0.0198	0.0224536	0.0267402	0.0228618	0.0369463	0.0277608	0.0573586	0.061237	0.0959379
TCGA-KK-A6E6	0.00325163	0.00350175	0.00275138	0.00375188	0.0030015	0.00475238	0.00550275	0.0050025	0.00450225	0.00250125	0.00450225	0.0030015	0.00250125	0.00375188	0.004002	0.00425213	0.0050025	0.00475238	0.00475238	0.0050025	0.004002	0.006003	0.0070035	0.00450225	0.00575288	0.00525263	0.006003	0.00675338	0.0090045	0.00575288	0.00775388	0.00750375	0.0107554	0.0070035	0.0105053	0.00925463	0.0155078	0.010005	0.0162581	0.0162581	0.0212606	0.0165083	0.0270135	0.0267634	0.04002	0.0422711	0.0637819	0.0725363	0.121061
TCGA-KK-A6E7	0.00147456	0.00294913	0.00344065	0.00393217	0.00368641	0.00221185	0.00294913	0.00393217	0.00319489	0.00368641	0.00491521	0.00368641	0.00270337	0.00368641	0.00466945	0.00516097	0.00466945	0.00344065	0.00417793	0.00761858	0.00540673	0.00516097	0.00565249	0.00540673	0.00663554	0.00786434	0.00614402	0.0068813	0.00761858	0.0068813	0.00835586	0.00614402	0.0103219	0.00712706	0.0115507	0.00884738	0.0137626	0.0125338	0.0117965	0.0176948	0.0191693	0.0159744	0.0250676	0.0216269	0.0294913	0.0282625	0.0511182	0.0545589	0.093389
TCGA-KK-A6E8	0.00108882	0.00233318	0.00155545	0.00139991	0.00139991	0.00139991	0.00186654	0.00108882	0.00186654	0.00031109	0.00186654	0.00202209	0.00233318	0.00202209	0.00388863	0.00124436	0.00295536	0.00248872	0.00186654	0.00326645	0.00357754	0.00248872	0.00373308	0.00186654	0.00357754	0.00435527	0.00326645	0.00279981	0.00373308	0.00373308	0.00342199	0.00559963	0.00746617	0.00606626	0.00746617	0.00668844	0.00979935	0.00871053	0.0115103	0.0139991	0.0174211	0.0172655	0.0206875	0.0203764	0.0354643	0.0368642	0.0611293	0.0692176	0.121636
TCGA-KK-A7AP	0.00136281	0.00287704	0.00378558	0.00333131	0.00317989	0.00287704	0.00242277	0.00211993	0.00272562	0.00136281	0.00211993	0.00211993	0.00317989	0.00393701	0.00333131	0.00181708	0.00348274	0.00333131	0.00408843	0.0045427	0.00469412	0.00181708	0.00348274	0.00348274	0.00529982	0.00529982	0.00408843	0.00484555	0.00605694	0.00317989	0.00696548	0.00757117	0.00802544	0.0071169	0.00938825	0.0090854	0.0113568	0.00999394	0.0127196	0.0149909	0.0181708	0.017868	0.0234706	0.0211993	0.0339188	0.0348274	0.053301	0.0586008	0.098728
TCGA-KK-A7AQ	0.00132953	0.000759734	0.00132953	0.00151947	0.0011396	0.000759734	0.0017094	0.0022792	0.00151947	0.00132953	0.000759734	0.00189934	0.0022792	0.0017094	0.00208927	0.0017094	0.00208927	0.00151947	0.00208927	0.00151947	0.0034188	0.0022792	0.00265907	0.00189934	0.00379867	0.00246914	0.00436847	0.0039886	0.0045584	0.00493827	0.00645774	0.00493827	0.00721747	0.00778727	0.0104463	0.00683761	0.0112061	0.00873694	0.0169041	0.0151947	0.0237417	0.0191833	0.0271605	0.0290598	0.037227	0.0474834	0.0659069	0.0700855	0.109212
TCGA-KK-A7AU	0.00355161	0.00688124	0.00577137	0.00665927	0.00776915	0.00732519	0.00488346	0.00510544	0.00843507	0.00665927	0.00665927	0.00554939	0.0082131	0.00577137	0.00799112	0.00577137	0.00932297	0.00621532	0.00954495	0.00621532	0.0126526	0.00954495	0.009101	0.00688124	0.0126526	0.00799112	0.0113208	0.00799112	0.0108768	0.00776915	0.0122087	0.00954495	0.0117647	0.0113208	0.0170921	0.0133185	0.0153163	0.0142064	0.0162042	0.0137625	0.0199778	0.0155383	0.0244173	0.0250832	0.0281909	0.0319645	0.0370699	0.0357381	0.063485
TCGA-KK-A7AV	0.00213447	0.00249022	0.0039132	0.00498043	0.00711491	0.00213447	0.00675916	0.00569192	0.00355745	0.0039132	0.00462469	0.0039132	0.00604767	0.00284596	0.00533618	0.0039132	0.0039132	0.00426894	0.00320171	0.00498043	0.00498043	0.00213447	0.00604767	0.00569192	0.00498043	0.00533618	0.00711491	0.00889363	0.00533618	0.00711491	0.00924938	0.00498043	0.00924938	0.00711491	0.00996087	0.0128068	0.0156528	0.0117396	0.0188545	0.0163643	0.01672	0.0188545	0.0227677	0.0288154	0.0430452	0.0387762	0.0622554	0.0594095	0.104589
TCGA-KK-A7AW	0.00177215	0.00405063	0.00329114	0.00303797	0.00329114	0.00379747	0.00481013	0.00531646	0.0035443	0.00329114	0.00708861	0.00455696	0.00506329	0.00303797	0.00455696	0.0035443	0.00556962	0.00455696	0.00455696	0.0043038	0.00506329	0.00379747	0.00632911	0.00607595	0.00582278	0.00481013	0.00607595	0.00708861	0.00734177	0.00683544	0.00835443	0.0106329	0.0113924	0.00835443	0.0131646	0.0103797	0.0189873	0.0139241	0.0197468	0.0151899	0.0263291	0.0220253	0.0301266	0.0306329	0.0473418	0.0410127	0.0627848	0.0650633	0.105316
TCGA-KK-A7AY	0.000719528	0.000863434	0.00187077	0.00158296	0.0024464	0.0024464	0.00172687	0.00143906	0.00158296	0.000431717	0.00201468	0.00143906	0.00374155	0.00172687	0.00215858	0.0025903	0.00287811	0.00158296	0.0025903	0.00215858	0.00374155	0.00273421	0.00172687	0.00287811	0.00215858	0.00273421	0.00215858	0.00316592	0.00316592	0.00431717	0.00359764	0.00345373	0.00489279	0.00302202	0.00575622	0.00546841	0.007627	0.00676356	0.0100734	0.00978558	0.00978558	0.0103612	0.0172687	0.016837	0.0231688	0.0257591	0.0364081	0.0456181	0.0874946
TCGA-KK-A7AZ	0.00253365	0.00443389	0.00380048	0.00285036	0.00475059	0.00380048	0.00459224	0.00332542	0.00380048	0.00443389	0.00522565	0.00364212	0.00570071	0.00221694	0.00554236	0.00364212	0.00490895	0.00522565	0.00633413	0.00427553	0.00696754	0.00617577	0.0050673	0.00538401	0.00680918	0.00665083	0.00823436	0.00712589	0.00981789	0.00712589	0.00902613	0.00886778	0.0118765	0.00997625	0.0104513	0.0101346	0.0120348	0.0136184	0.0152019	0.0153603	0.0177356	0.0186857	0.0231196	0.0193191	0.0308789	0.031829	0.0451306	0.0435471	0.0728424
TCGA-KK-A7B0	0.00374813	0.00649675	0.00749625	0.00449775	0.00474763	0.00549725	0.00549725	0.00574713	0.00449775	0.003998	0.00649675	0.00424788	0.0089955	0.00424788	0.0049975	0.00324838	0.0069965	0.00424788	0.00449775	0.00574713	0.00849575	0.00674663	0.00949525	0.00574713	0.00849575	0.00874563	0.0109945	0.0089955	0.0109945	0.00874563	0.00974513	0.00849575	0.0142429	0.0102449	0.0124938	0.0162419	0.0172414	0.011994	0.0187406	0.0209895	0.0217391	0.0227386	0.0289855	0.0289855	0.0427286	0.0387306	0.0552224	0.061969	0.0962019
TCGA-KK-A7B1	0.00472002	0.00536366	0.00665093	0.00429092	0.00450547	0.00472002	0.0055782	0.0055782	0.00536366	0.00493456	0.00750912	0.00450547	0.00729457	0.00472002	0.00643639	0.00450547	0.00622184	0.00536366	0.0087964	0.00321819	0.00708003	0.00622184	0.00986913	0.00600729	0.00922549	0.00793821	0.00729457	0.00793821	0.00986913	0.00922549	0.011371	0.0087964	0.0100837	0.0111564	0.0111564	0.0105128	0.0188801	0.0111564	0.016091	0.0197383	0.023171	0.0175928	0.0266037	0.0225274	0.0388329	0.0336838	0.0587857	0.0630766	0.0944003
TCGA-KK-A7B2	0.00303783	0.00469484	0.00303783	0.00359017	0.003314	0.00386634	0.00441867	0.00359017	0.0024855	0.00359017	0.004971	0.00359017	0.00359017	0.00359017	0.0074565	0.00635184	0.004971	0.004971	0.004971	0.00552334	0.00800884	0.004971	0.00607567	0.0057995	0.00441867	0.0041425	0.00690417	0.00524717	0.0110467	0.00718034	0.0091135	0.00552334	0.00856117	0.0074565	0.0138083	0.0127037	0.0179508	0.0157415	0.0168462	0.0146368	0.0220933	0.0190555	0.0278928	0.0251312	0.0394919	0.0353494	0.0541287	0.0582712	0.0905827
TCGA-KK-A7B3	0.00150279	0.0027909	0.00300558	0.00257621	0.00171748	0.00171748	0.00257621	0.00300558	0.00300558	0.00214684	0.00386432	0.0027909	0.00450837	0.00300558	0.004079	0.0027909	0.00364964	0.00300558	0.00386432	0.00429369	0.00536711	0.0027909	0.00386432	0.00193216	0.00665522	0.00343495	0.00579648	0.00214684	0.00429369	0.00493774	0.00515243	0.0027909	0.00880206	0.00622585	0.00622585	0.00837269	0.011593	0.00837269	0.00944611	0.011593	0.0158866	0.0139545	0.0206097	0.0199657	0.0257621	0.0276943	0.0403607	0.0502362	0.0897381
TCGA-KK-A7B4	0.00323167	0.00525146	0.00666532	0.00666532	0.00706928	0.0078772	0.00525146	0.00363563	0.00504948	0.00666532	0.00626136	0.00605938	0.0068673	0.00424157	0.00949303	0.00646334	0.00727126	0.00605938	0.00767522	0.00727126	0.00605938	0.00646334	0.00807918	0.00727126	0.00888709	0.00706928	0.010099	0.0078772	0.010099	0.00929105	0.0115128	0.0078772	0.0129267	0.00767522	0.0123207	0.0123207	0.0155524	0.0137346	0.0155524	0.0147445	0.0185821	0.0183801	0.0222177	0.0240355	0.0284791	0.0337306	0.0434256	0.0458493	0.0830135
TCGA-KK-A8I4	0.00236078	0.00499931	0.00486044	0.00444383	0.00583252	0.00597139	0.0045827	0.00388835	0.00402722	0.00486044	0.00624913	0.00624913	0.00472157	0.00263852	0.00555478	0.00597139	0.00527704	0.00555478	0.00597139	0.00611026	0.00694348	0.00680461	0.00722122	0.00624913	0.00916539	0.00652687	0.00874878	0.00819331	0.00999861	0.00805444	0.0118039	0.00930426	0.012776	0.010693	0.012776	0.0137481	0.0183308	0.0155534	0.020275	0.0172198	0.0233301	0.022358	0.0295792	0.0316623	0.0374948	0.0334676	0.0545758	0.0609638	0.0942925
TCGA-KK-A8I5	0.00537815	0.00907563	0.00991597	0.00655462	0.00739496	0.00806723	0.00773109	0.00638655	0.010084	0.00857143	0.00840336	0.00739496	0.00991597	0.0092437	0.0097479	0.00890756	0.0102521	0.00957983	0.0119328	0.0105882	0.012605	0.00705882	0.00957983	0.00840336	0.0142857	0.00840336	0.0109244	0.00857143	0.0114286	0.0110924	0.0127731	0.00957983	0.0115966	0.00890756	0.0104202	0.0109244	0.0134454	0.0129412	0.0136134	0.012605	0.0151261	0.0132773	0.0168067	0.0154622	0.022521	0.0252101	0.027395	0.030084	0.0522689
TCGA-KK-A8I6	0.0029383	0.0046523	0.00416259	0.00440744	0.00489716	0.00440744	0.00563173	0.00636631	0.00563173	0.0046523	0.00685602	0.00342801	0.00391773	0.00367287	0.00489716	0.00538688	0.00636631	0.00563173	0.00612145	0.00636631	0.00661117	0.00832517	0.00710088	0.00587659	0.00783546	0.00587659	0.00808031	0.00734574	0.0122429	0.00661117	0.011998	0.00857003	0.0110186	0.0127326	0.0208129	0.0142018	0.0210578	0.013712	0.0203232	0.0183643	0.0195886	0.0235064	0.0303624	0.0279138	0.0386876	0.0401567	0.0590108	0.053379	0.0812929
TCGA-KK-A8I7	0.00362647	0.00543971	0.0074796	0.00430644	0.00702629	0.00453309	0.00679964	0.00679964	0.00634633	0.00453309	0.00611967	0.00430644	0.00883953	0.00566636	0.00430644	0.0049864	0.00770626	0.00883953	0.00543971	0.00543971	0.00883953	0.00521306	0.00861287	0.00566636	0.00906618	0.00475975	0.0106528	0.0074796	0.00793291	0.00929284	0.0147325	0.00861287	0.0106528	0.0113327	0.0126927	0.0106528	0.0142792	0.0156392	0.018359	0.0151859	0.0233454	0.0192656	0.0287851	0.0247053	0.0376247	0.0344515	0.0478241	0.0473708	0.0788758
TCGA-KK-A8I8	0.00274725	0.00549451	0.00892857	0.00858516	0.00824176	0.00618132	0.00755495	0.00858516	0.00721154	0.00789835	0.00549451	0.00549451	0.00755495	0.00412088	0.00961538	0.00652473	0.00652473	0.00789835	0.0120192	0.0051511	0.00721154	0.00824176	0.00927198	0.00652473	0.0123626	0.0113324	0.0113324	0.00686813	0.00892857	0.00995879	0.0130495	0.00927198	0.0161401	0.00824176	0.0157967	0.010989	0.0233516	0.0182005	0.018544	0.0182005	0.0230082	0.0216346	0.0257555	0.0254121	0.0315934	0.0339973	0.043956	0.0487637	0.0779533
TCGA-KK-A8I9	0.00108401	0.00216802	0.00325203	0.00271003	0.00189702	0.00189702	0.00216802	0.00271003	0.00352304	0.00162602	0.00189702	0.00216802	0.00298103	0.00216802	0.00243902	0.00352304	0.00460705	0.00243902	0.00460705	0.00243902	0.00542005	0.00406504	0.00325203	0.00271003	0.00650407	0.00243902	0.00487805	0.00433604	0.00623306	0.00569106	0.00514905	0.00596206	0.0097561	0.00623306	0.00921409	0.00867209	0.0105691	0.00623306	0.0119241	0.0132791	0.0124661	0.0170732	0.0249322	0.0203252	0.0289973	0.0344173	0.0455285	0.0588076	0.104065
TCGA-KK-A8IA	0.00234349	0.00318045	0.00502176	0.00451958	0.00552394	0.00485437	0.00552394	0.0063609	0.00502176	0.0041848	0.00485437	0.00502176	0.00552394	0.00401741	0.00451958	0.00502176	0.0063609	0.00485437	0.00585872	0.00652829	0.00468698	0.00753264	0.00770003	0.0063609	0.00686307	0.00786743	0.00820221	0.00786743	0.0083696	0.00619351	0.00887178	0.0063609	0.00937395	0.0113827	0.0125544	0.00937395	0.0157349	0.0120522	0.0159022	0.0150653	0.0177436	0.0202544	0.0276197	0.0215936	0.0378306	0.0398393	0.0513894	0.0570807	0.106629
TCGA-KK-A8IB	0.00263803	0.00282646	0.00263803	0.00263803	0.00226116	0.00395704	0.00207273	0.00358018	0.00263803	0.00131901	0.00376861	0.00226116	0.00358018	0.00263803	0.00546448	0.00320332	0.00395704	0.00489919	0.00376861	0.00358018	0.00584134	0.00320332	0.00584134	0.00489919	0.00358018	0.00489919	0.00565291	0.00527605	0.00489919	0.0043339	0.00734878	0.0062182	0.00753721	0.00772565	0.00678349	0.00791408	0.00960995	0.00640663	0.00979838	0.0113058	0.0167703	0.013567	0.014886	0.0177125	0.0199736	0.0239307	0.0401357	0.0373092	0.0768796
TCGA-KK-A8IC	0.002405	0.001924	0.00513067	0.003848	0.003367	0.003848	0.00416867	0.00416867	0.00625301	0.00481	0.00448934	0.00256534	0.00497034	0.00320667	0.00545134	0.002886	0.00513067	0.00513067	0.00497034	0.00641334	0.00657367	0.00368767	0.00609267	0.00513067	0.00625301	0.00577201	0.00785634	0.00593234	0.00625301	0.00881834	0.00881834	0.00705467	0.0102613	0.0112233	0.0123457	0.00978034	0.015392	0.0128267	0.0171557	0.0150713	0.0189194	0.0165143	0.024531	0.0243707	0.0333494	0.032708	0.0397627	0.0445727	0.0639731
TCGA-KK-A8ID	0.00263443	0.00588873	0.0074384	0.0055788	0.0069735	0.00619867	0.0055788	0.00495893	0.00728343	0.00526887	0.00867813	0.00495893	0.00728343	0.00433907	0.00635363	0.00635363	0.0097629	0.00542383	0.00728343	0.00635363	0.0069735	0.00681853	0.00666357	0.00635363	0.00852317	0.0051139	0.0097629	0.00728343	0.0105377	0.0074384	0.0106927	0.0088331	0.00960793	0.0102278	0.0097629	0.00821323	0.0123973	0.0128622	0.0144119	0.0154967	0.0164265	0.0182861	0.0182861	0.0192159	0.0291337	0.0275841	0.0379668	0.0362622	0.0663257
TCGA-KK-A8IF	0.0046033	0.00487409	0.00731113	0.00812348	0.00541565	0.00649878	0.00812348	0.00758191	0.00676956	0.006228	0.00866504	0.00839426	0.00785269	0.006228	0.00785269	0.006228	0.00568643	0.00812348	0.0121852	0.00758191	0.00785269	0.00785269	0.00866504	0.00487409	0.00920661	0.00704035	0.0108313	0.0102897	0.0102897	0.0127268	0.0113729	0.0143515	0.0143515	0.014893	0.0157054	0.0132683	0.0192256	0.0170593	0.0200379	0.0203087	0.0265367	0.0213918	0.0322231	0.0205795	0.0303276	0.0370972	0.0536149	0.0465746	0.077173
TCGA-KK-A8IG	0.00234349	0.00368262	0.00736525	0.00267827	0.00401741	0.00368262	0.00602611	0.00401741	0.00368262	0.00334784	0.00301306	0.00301306	0.00535655	0.00535655	0.00803482	0.00535655	0.00669568	0.00468698	0.0103783	0.00569133	0.00569133	0.00569133	0.00569133	0.0063609	0.00569133	0.00770003	0.00870439	0.00937395	0.00703047	0.00736525	0.0103783	0.0063609	0.0133914	0.0107131	0.0160696	0.00870439	0.0164044	0.0143957	0.0227653	0.0204218	0.0264479	0.0224305	0.0331436	0.0338132	0.0482089	0.0448611	0.0595916	0.0562437	0.0917308
TCGA-KK-A8IH	0.00141218	0.00211827	0.00264784	0.00282436	0.00317741	0.00335393	0.00370697	0.00511915	0.00282436	0.00229479	0.00247132	0.00176523	0.00123566	0.00247132	0.00247132	0.00264784	0.00335393	0.00247132	0.00247132	0.00282436	0.00406002	0.0038835	0.00441306	0.00211827	0.00406002	0.00300088	0.00317741	0.00370697	0.00670786	0.00458959	0.00582524	0.00441306	0.0054722	0.0038835	0.00847308	0.00635481	0.00882613	0.0086496	0.00882613	0.00653133	0.0116505	0.0130627	0.0157105	0.0167696	0.0197705	0.0197705	0.0375993	0.0458959	0.0889673
TCGA-KK-A8II	0.00235664	0.00455617	0.00471328	0.00439906	0.00471328	0.00361351	0.00424195	0.00471328	0.00392773	0.00471328	0.00565593	0.00267086	0.00549882	0.00628437	0.00424195	0.00534171	0.00659859	0.00565593	0.00738413	0.00565593	0.00628437	0.00471328	0.00738413	0.0069128	0.00769835	0.00502749	0.0108405	0.00534171	0.00942655	0.00644148	0.00785546	0.00816968	0.010055	0.00879811	0.0111548	0.00801257	0.0152396	0.0139827	0.0175962	0.0113119	0.0182247	0.0166536	0.0229379	0.0188531	0.0342498	0.0323645	0.0538885	0.0562451	0.094894
TCGA-KK-A8IJ	0.000819672	0.00273224	0.00300546	0.0010929	0.00245902	0.000546448	0.00327869	0.0010929	0.00245902	0.00191257	0.00218579	0.000819672	0.00218579	0.00273224	0.00519126	0.00273224	0.00327869	0.00191257	0.00191257	0.00382514	0.00382514	0.00355191	0.00382514	0.00327869	0.00300546	0.00300546	0.00546448	0.00409836	0.00546448	0.00300546	0.0068306	0.00519126	0.0057377	0.00382514	0.00765027	0.0057377	0.00983607	0.00983607	0.0101093	0.00901639	0.0180328	0.0125683	0.0199454	0.020765	0.0256831	0.029235	0.0453552	0.0510929	0.107923
TCGA-KK-A8IK	0.00385746	0.00440852	0.00551065	0.0064291	0.00587803	0.00495959	0.00771492	0.00404115	0.00587803	0.00495959	0.00826598	0.00569434	0.00734754	0.00753123	0.00771492	0.00716385	0.00771492	0.00569434	0.00900073	0.00771492	0.0115724	0.00606172	0.00881705	0.00679647	0.0101029	0.00900073	0.0104702	0.00679647	0.0126745	0.0108376	0.0115724	0.0101029	0.0115724	0.0124908	0.0152461	0.0154298	0.017083	0.0191036	0.020022	0.0183688	0.0273696	0.0183688	0.0271859	0.028288	0.0405952	0.0349008	0.050147	0.0499633	0.0802719
TCGA-KK-A8IL	0.00387297	0.00645494	0.00903692	0.00722954	0.00774593	0.00645494	0.00697134	0.00826233	0.0103279	0.00619675	0.0100697	0.00568035	0.0121353	0.00593855	0.00748774	0.00955332	0.0105861	0.00516396	0.0126517	0.00697134	0.0113607	0.00826233	0.00852053	0.0131681	0.0113607	0.00877872	0.0105861	0.0105861	0.0129099	0.0131681	0.0142009	0.0123935	0.0172993	0.0105861	0.0170411	0.0160083	0.0178156	0.0180738	0.0240124	0.0160083	0.0284018	0.0229796	0.0294345	0.0237542	0.0356313	0.0302091	0.0392461	0.0317583	0.0568035
TCGA-KK-A8IM	0.0042123	0.00358045	0.00652906	0.00358045	0.00442291	0.00400168	0.0056866	0.00610783	0.00547599	0.00442291	0.0056866	0.00484414	0.00400168	0.00484414	0.0056866	0.00484414	0.00631845	0.00231676	0.00652906	0.00758214	0.00652906	0.00631845	0.00695029	0.00695029	0.00884583	0.00673968	0.0098989	0.0084246	0.00968829	0.0098989	0.0113732	0.0124263	0.0103201	0.0113732	0.0145324	0.0115838	0.0172704	0.0134794	0.0237995	0.017481	0.0244313	0.0252738	0.0282224	0.0309604	0.0425442	0.0358045	0.0589722	0.059604	0.0987784
TCGA-M7-A71Y	0.00514286	0.00457143	0.00342857	0.00514286	0.00571429	0.00571429	0.00514286	0.00685714	0.00457143	0.00514286	0.00857143	0.00571429	0.0114286	0.00285714	0.0102857	0.00685714	0.00514286	0.00628571	0.00742857	0.00628571	0.00685714	0.008	0.00742857	0.00628571	0.00857143	0.00685714	0.00914286	0.00857143	0.008	0.0131429	0.00971429	0.00742857	0.0108571	0.012	0.0142857	0.0131429	0.0205714	0.0131429	0.0188571	0.0205714	0.0217143	0.0257143	0.0291429	0.0274286	0.0354286	0.0365714	0.064	0.0594286	0.114286
TCGA-M7-A71Z	0.00179211	0.00806452	0.00582437	0.00448029	0.00403226	0.00403226	0.00537634	0.00358423	0.00403226	0.00358423	0.00537634	0.00179211	0.00537634	0.00672043	0.00582437	0.00582437	0.00582437	0.00448029	0.00672043	0.00358423	0.00896057	0.00672043	0.0094086	0.00537634	0.00985663	0.00716846	0.00851254	0.00806452	0.00851254	0.0116487	0.0125448	0.00716846	0.0134409	0.0116487	0.0120968	0.0107527	0.0165771	0.015233	0.0197133	0.0174731	0.0147849	0.0129928	0.031362	0.0237455	0.0331541	0.030914	0.046595	0.0591398	0.104391
TCGA-M7-A720	0.00369686	0.004313	0.00492914	0.00492914	0.00554529	0.004313	0.00492914	0.00554529	0.00492914	0.00554529	0.00369686	0.00492914	0.00739372	0.00554529	0.00492914	0.00677757	0.00985829	0.00616143	0.00308071	0.00677757	0.0147874	0.00800986	0.008626	0.00985829	0.0123229	0.00616143	0.0117067	0.00985829	0.012939	0.0135551	0.012939	0.00800986	0.0203327	0.0141713	0.0184843	0.021565	0.025878	0.0209489	0.0252619	0.0277264	0.0252619	0.0289587	0.0357363	0.034504	0.0449784	0.0597659	0.0702403	0.0523722	0.101664
TCGA-M7-A721	0.0037296	0.00745921	0.00792541	0.00885781	0.00839161	0.0037296	0.00792541	0.0107226	0.00699301	0.00559441	0.00839161	0.00559441	0.00792541	0.00792541	0.00606061	0.00559441	0.00885781	0.00699301	0.00839161	0.011655	0.0107226	0.00606061	0.00839161	0.0125874	0.00885781	0.00979021	0.00745921	0.0111888	0.0167832	0.0135198	0.0125874	0.0111888	0.018648	0.013986	0.018648	0.02331	0.018648	0.0135198	0.0242424	0.0247086	0.0340326	0.0275058	0.0344988	0.030303	0.0456876	0.0386946	0.0638695	0.0596737	0.0913753
TCGA-M7-A722	0.00727449	0.014549	0.0252182	0.0169738	0.0203686	0.0193986	0.0160039	0.013579	0.0184287	0.0184287	0.0213385	0.0101843	0.0179437	0.0130941	0.0179437	0.0116392	0.0203686	0.0189137	0.0198836	0.0164888	0.0160039	0.0164888	0.014064	0.0174588	0.0198836	0.0155189	0.0169738	0.0155189	0.0164888	0.0198836	0.0164888	0.0150339	0.0208535	0.0174588	0.014549	0.0160039	0.0223084	0.014549	0.0150339	0.0164888	0.0174588	0.0198836	0.0213385	0.0116392	0.0300679	0.0184287	0.0247333	0.0295829	0.0499515
TCGA-M7-A723	0.0160976	0.0226829	0.0314634	0.0256098	0.0292683	0.0265854	0.0282927	0.0256098	0.0265854	0.0209756	0.0287805	0.0217073	0.0221951	0.0243902	0.0234146	0.0231707	0.0263415	0.0178049	0.0231707	0.0212195	0.0202439	0.0170732	0.0197561	0.0192683	0.0214634	0.0158537	0.022439	0.0095122	0.0153659	0.0126829	0.0156098	0.0136585	0.017561	0.0143902	0.0168293	0.0109756	0.0126829	0.0112195	0.0126829	0.0131707	0.0153659	0.0136585	0.0139024	0.0141463	0.0163415	0.0146341	0.0202439	0.0182927	0.0282927
TCGA-M7-A724	0.00520156	0.00715215	0.00455137	0.00650195	0.00520156	0.00845254	0.00650195	0.0123537	0.00585176	0.00910273	0.00715215	0.00715215	0.00780234	0.00845254	0.00845254	0.00650195	0.00715215	0.00650195	0.00910273	0.00585176	0.0123537	0.00910273	0.00715215	0.0123537	0.00780234	0.0117035	0.00780234	0.0104031	0.0162549	0.00650195	0.0156047	0.0162549	0.0110533	0.0123537	0.00975293	0.0104031	0.0123537	0.0162549	0.0208062	0.0156047	0.0162549	0.0136541	0.020156	0.0312094	0.0279584	0.0331599	0.0572172	0.0604681	0.0988296
TCGA-M7-A725	0.00644567	0.0101289	0.00828729	0.00644567	0.00552486	0.00276243	0.0101289	0.00736648	0.00460405	0.00736648	0.0092081	0.00276243	0.0128913	0.00552486	0.00736648	0.00644567	0.00644567	0.00644567	0.00736648	0.00552486	0.00644567	0.00828729	0.014733	0.0092081	0.0128913	0.00828729	0.00644567	0.0138122	0.0138122	0.0128913	0.0174954	0.0101289	0.019337	0.0184162	0.0156538	0.019337	0.0248619	0.0138122	0.0230203	0.0211786	0.0303867	0.0303867	0.0359116	0.0368324	0.0506446	0.0524862	0.0626151	0.0543278	0.0773481
TCGA-MG-AAMC	0.00169731	0.00282885	0.00424328	0.0039604	0.00339463	0.00367751	0.00339463	0.00169731	0.0019802	0.00254597	0.00339463	0.00254597	0.00565771	0.00282885	0.00311174	0.0019802	0.0039604	0.0019802	0.00282885	0.00424328	0.00735502	0.0039604	0.00509194	0.00565771	0.00509194	0.00424328	0.00480905	0.00565771	0.00763791	0.00594059	0.00792079	0.00792079	0.00792079	0.00537482	0.00735502	0.0121641	0.0127298	0.0101839	0.0155587	0.0101839	0.0166902	0.0181047	0.0220651	0.0231966	0.029703	0.0291372	0.0472419	0.0531825	0.0975955
TCGA-QU-A6IL	0.00045489	0.00015163	0.00166793	0.00045489	0.00060652	0.00121304	0.00121304	0.0015163	0.00045489	0.00060652	0.00166793	0.00136467	0.00090978	0.00045489	0.00045489	0.00106141	0.00045489	0.00121304	0.00136467	0.00045489	0.00106141	0.00060652	0.00090978	0.0015163	0.00075815	0.00136467	0.00181956	0.00090978	0.0015163	0.0015163	0.0015163	0.00136467	0.00166793	0.00227445	0.00136467	0.00257771	0.00379075	0.00363912	0.00576194	0.00439727	0.00803639	0.00970432	0.00970432	0.011069	0.0222896	0.0195603	0.0360879	0.045489	0.107354
TCGA-QU-A6IM	0.00151934	0.00138122	0.00262431	0.00234807	0.00179558	0.0019337	0.0019337	0.00303867	0.00345304	0.00234807	0.0038674	0.00331492	0.00276243	0.00179558	0.00179558	0.00220994	0.00234807	0.00290055	0.00345304	0.00262431	0.00331492	0.00290055	0.00303867	0.00290055	0.00345304	0.00359116	0.00290055	0.00248619	0.00455801	0.0038674	0.00359116	0.0038674	0.00455801	0.00248619	0.00455801	0.00331492	0.00303867	0.00455801	0.00621547	0.00649171	0.00676796	0.00621547	0.00814917	0.00911602	0.0106354	0.0149171	0.0233425	0.023895	0.05
TCGA-QU-A6IN	0.00154825	0.00361259	0.00344056	0.00223637	0.00206434	0.00309651	0.00326854	0.00292448	0.00395665	0.00292448	0.00498882	0.00412868	0.00326854	0.00189231	0.00447273	0.00292448	0.00447273	0.00240839	0.00309651	0.00206434	0.00378462	0.00292448	0.00464476	0.00223637	0.00567693	0.00464476	0.00464476	0.00464476	0.00464476	0.00567693	0.00619302	0.00636504	0.00584896	0.00602099	0.00980561	0.00894547	0.00928952	0.00877344	0.0132462	0.0127301	0.0139343	0.0115259	0.0206434	0.018579	0.0227077	0.0273525	0.0399105	0.042835	0.0789609
TCGA-QU-A6IO	0.000867553	0.00144592	0.00173511	0.00260266	0.00173511	0.00260266	0.00318103	0.00260266	0.000578369	0.00260266	0.00347021	0.00144592	0.00347021	0.00231348	0.00289184	0.00231348	0.00289184	0.00347021	0.0037594	0.00347021	0.00318103	0.00260266	0.00231348	0.00202429	0.00491614	0.00318103	0.00520532	0.00144592	0.00549451	0.00578369	0.00491614	0.00520532	0.00462695	0.00578369	0.00954309	0.0106998	0.0092539	0.0092539	0.0130133	0.0135917	0.0150376	0.0185078	0.0280509	0.021978	0.0419318	0.0433777	0.0694043	0.082996	0.134471
TCGA-QU-A6IP	0.00185874	0.0023898	0.0031864	0.00345194	0.0031864	0.00345194	0.00504514	0.00345194	0.0023898	0.00212427	0.00557621	0.00477961	0.00371747	0.00424854	0.00345194	0.00292087	0.00557621	0.00398301	0.00451407	0.00292087	0.00531067	0.00637281	0.00398301	0.00584174	0.00584174	0.00424854	0.00531067	0.00424854	0.00743494	0.00504514	0.00743494	0.00477961	0.00876261	0.00610728	0.0103558	0.00663834	0.0127456	0.0111524	0.0135422	0.0127456	0.0148699	0.0146044	0.0268189	0.0257568	0.0281466	0.0294742	0.051248	0.0576208	0.102762
TCGA-SU-A7E7	0	0	0	0	0	0	0	0.000947867	0	0	0	0	0	0	0.000947867	0	0	0	0	0.000947867	0	0	0	0	0.000947867	0.000947867	0	0	0	0.000947867	0.000947867	0	0.000947867	0.000947867	0.000947867	0.000947867	0.000947867	0.0028436	0.000947867	0.00189573	0	0.00189573	0.00473934	0.000947867	0.00853081	0.0056872	0.0208531	0.0218009	0.0616114
TCGA-TK-A8OK	0.00132203	0.00124426	0.00248853	0.0016331	0.00194416	0.0018664	0.0025663	0.00202193	0.002333	0.00155533	0.00241076	0.00225523	0.0030329	0.00217746	0.002333	0.00217746	0.00194416	0.00241076	0.002333	0.00217746	0.00342173	0.0030329	0.0030329	0.0025663	0.00287736	0.00225523	0.00334396	0.0030329	0.00349949	0.00264406	0.00326619	0.00412163	0.00489929	0.0018664	0.00489929	0.00388833	0.00482153	0.00474376	0.00598802	0.00629909	0.00746559	0.00762112	0.00940975	0.00839879	0.0105763	0.0117427	0.0181196	0.0174197	0.0340617
TCGA-TP-A8TT	0.00303951	0.00607903	0.00683891	0.00633232	0.00531915	0.00633232	0.00506586	0.00582573	0.00810537	0.00506586	0.00785208	0.00531915	0.00506586	0.00759878	0.00531915	0.00683891	0.00987842	0.00658561	0.0113982	0.00658561	0.0108916	0.00911854	0.00734549	0.00734549	0.00911854	0.00937183	0.0108916	0.00911854	0.0116515	0.010385	0.0131712	0.0101317	0.0159574	0.0129179	0.0139311	0.0144377	0.0243161	0.0141844	0.0222898	0.0200101	0.0253293	0.025076	0.0321682	0.031155	0.0321682	0.029382	0.0486322	0.0504053	0.0739615
TCGA-TP-A8TV	0.00161878	0.00445164	0.00607042	0.00485633	0.00566572	0.00809389	0.0072845	0.00526103	0.00526103	0.00647511	0.00566572	0.00485633	0.0072845	0.00687981	0.0113314	0.0072845	0.00607042	0.0072845	0.0101174	0.00485633	0.0109268	0.00809389	0.00930797	0.0109268	0.00930797	0.00607042	0.0129502	0.0129502	0.0121408	0.0153784	0.0129502	0.0105221	0.0182113	0.0157831	0.0149737	0.0174019	0.0210441	0.0161878	0.0246864	0.0214488	0.0331849	0.0222582	0.0404694	0.0356131	0.0542291	0.0461352	0.0671793	0.0611089	0.0938891
TCGA-V1-A8MF	0.00102916	0.00102916	0.00308748	0.00343053	0.00137221	0.00411664	0.00445969	0.00274443	0.00171527	0.00137221	0.00171527	0.00274443	0.00343053	0.00343053	0.00240137	0.00205832	0.00308748	0.00377358	0.00343053	0.00171527	0.00240137	0.00205832	0.00480274	0.00274443	0.00617496	0.00343053	0.0051458	0.0051458	0.00651801	0.00343053	0.0051458	0.00445969	0.00720412	0.0051458	0.00823328	0.00480274	0.0109777	0.00686106	0.0116638	0.00926244	0.0157804	0.0154374	0.0212693	0.0205832	0.0236707	0.0274443	0.0473413	0.0662093	0.109777
TCGA-V1-A8MJ	0.003003	0.00800801	0.00533867	0.00767434	0.00600601	0.00700701	0.00734067	0.00600601	0.00600601	0.00567234	0.00333667	0.00433767	0.0113447	0.00500501	0.00500501	0.00533867	0.00533867	0.00333667	0.00600601	0.00567234	0.00633967	0.00266934	0.00633967	0.00767434	0.00767434	0.00667334	0.00867534	0.00567234	0.00767434	0.00467134	0.00734067	0.00767434	0.00667334	0.00800801	0.00834168	0.00834168	0.0113447	0.00867534	0.01001	0.00734067	0.0123457	0.01001	0.0156823	0.02002	0.025025	0.028028	0.048048	0.0573907	0.105439
TCGA-V1-A8MK	0.00104431	0.000895122	0.00179024	0.000596748	0.00149187	0.000596748	0.000895122	0.000895122	0.0011935	0.00104431	0.00208862	0.0011935	0.00134268	0.0022378	0.000895122	0.0011935	0.0011935	0.00134268	0.00268536	0.0011935	0.00253618	0.00149187	0.0022378	0.00313293	0.00313293	0.00164106	0.00313293	0.00253618	0.00253618	0.00253618	0.00551992	0.00313293	0.00372967	0.00268536	0.00522154	0.00358049	0.00522154	0.00626585	0.00626585	0.0068626	0.00939878	0.00924959	0.0149187	0.0140236	0.0201402	0.0217813	0.0399821	0.0378935	0.0823512
TCGA-V1-A8ML	0.000909918	0.0022748	0.00363967	0.00318471	0.00181984	0.00318471	0.00500455	0.00363967	0.00363967	0.00318471	0.00454959	0.0022748	0.00591447	0.00318471	0.00409463	0.00409463	0.00500455	0.00272975	0.00318471	0.00682439	0.00636943	0.00545951	0.00500455	0.00363967	0.0104641	0.00500455	0.00545951	0.00818926	0.00955414	0.00727934	0.00955414	0.00864422	0.00909918	0.00545951	0.010919	0.0118289	0.0136488	0.0118289	0.0163785	0.010919	0.0236579	0.0204732	0.0254777	0.0282075	0.0414013	0.0327571	0.0505005	0.0609645	0.109645
TCGA-V1-A8MM	0.000457561	0.000915122	0.00160146	0.00137268	0.00228781	0.00137268	0.00228781	0.00137268	0.00137268	0.000686342	0.00183024	0.00205903	0.0011439	0.00160146	0.00205903	0.00205903	0.00228781	0.00205903	0.00183024	0.0011439	0.00228781	0.00205903	0.00274537	0.00137268	0.00228781	0.00274537	0.00526195	0.00274537	0.00343171	0.00320293	0.00411805	0.00434683	0.00617708	0.00571951	0.00754976	0.00549073	0.00983757	0.00663464	0.00846488	0.0109815	0.0178449	0.0164722	0.0217342	0.020819	0.0329444	0.03752	0.0528483	0.0693205	0.14253
TCGA-V1-A8MU	0.00115119	0.00537222	0.00422103	0.00345357	0.00690714	0.00575595	0.00537222	0.00498849	0.00613968	0.00498849	0.00422103	0.00460476	0.0038373	0.0038373	0.00575595	0.00575595	0.00575595	0.00537222	0.00844206	0.00498849	0.00690714	0.00345357	0.00729087	0.00613968	0.00729087	0.00729087	0.00690714	0.00652341	0.00729087	0.00460476	0.0103607	0.00959325	0.0111282	0.00920952	0.00959325	0.00959325	0.0130468	0.0134305	0.0145817	0.0130468	0.019954	0.0161167	0.0303147	0.0207214	0.0310821	0.0399079	0.0544896	0.0675365	0.103991
TCGA-V1-A8WL	0.00472122	0.00584532	0.0121403	0.00764388	0.00989209	0.00921763	0.0116906	0.00899281	0.0101169	0.00809353	0.00854317	0.00899281	0.0103417	0.00786871	0.0130396	0.0121403	0.0105665	0.00854317	0.0116906	0.0123651	0.00809353	0.00966727	0.013714	0.0107914	0.0128147	0.0134892	0.0119155	0.00989209	0.0191097	0.00944245	0.0188849	0.0150629	0.0132644	0.0141637	0.0166367	0.0177608	0.0218076	0.017536	0.024955	0.0179856	0.0229317	0.0213579	0.0299011	0.0242806	0.0283273	0.0292266	0.0427158	0.0406924	0.0618255
TCGA-V1-A8WS	0.00101963	0.00229416	0.00152944	0.00203926	0.00178435	0.00127453	0.00229416	0.00127453	0.00203926	0.00229416	0.00178435	0.00178435	0.00280398	0.00178435	0.00229416	0.00152944	0.00178435	0.00407851	0.00331379	0.00254907	0.00305888	0.00331379	0.0035687	0.00280398	0.00560795	0.00254907	0.0035687	0.00331379	0.00535305	0.00229416	0.00535305	0.00229416	0.00790212	0.00484323	0.00892174	0.00586286	0.0119806	0.00994137	0.00968646	0.0142748	0.0160591	0.0170788	0.0221769	0.0234514	0.0402753	0.038491	0.0650013	0.0680602	0.128473
TCGA-V1-A8WV	0.00203897	0.00589035	0.00543725	0.00181242	0.00521069	0.00271862	0.00498414	0.00475759	0.00634345	0.00453104	0.00475759	0.00317173	0.00407793	0.00475759	0.00589035	0.00339828	0.00475759	0.00407793	0.00543725	0.00317173	0.00543725	0.00453104	0.0056638	0.00475759	0.00589035	0.00747621	0.00770276	0.00543725	0.00860897	0.00906208	0.00634345	0.00951518	0.0104214	0.00951518	0.0122338	0.0120072	0.00974173	0.00815587	0.0140462	0.0122338	0.0135931	0.0142728	0.0199366	0.0183507	0.0251473	0.0258269	0.0423652	0.0419121	0.0962845
TCGA-V1-A8WW	0.00612384	0.0077115	0.0113404	0.00861873	0.00884554	0.0117941	0.0124745	0.0104332	0.0124745	0.0113404	0.0111136	0.014289	0.014289	0.01066	0.0149694	0.0129281	0.0161034	0.0120209	0.0145158	0.0122477	0.0147426	0.0117941	0.0151962	0.0136085	0.0161034	0.0127013	0.0179179	0.0131549	0.0190519	0.00952597	0.0176911	0.0127013	0.0183715	0.0122477	0.0185983	0.0129281	0.0192787	0.0163302	0.0188251	0.0185983	0.0204128	0.0147426	0.02132	0.0238149	0.0226809	0.0283511	0.0358358	0.026083	0.0505784
TCGA-V1-A8X3	0.000566091	0.00113218	0.00198132	0.000990659	0.000849137	0.000990659	0.00113218	0.000990659	0.000424568	0.0018398	0.00113218	0.000990659	0.00155675	0.00113218	0.00198132	0.00113218	0.00240589	0.00113218	0.00198132	0.00127371	0.0018398	0.00226436	0.00240589	0.00283046	0.00198132	0.00155675	0.00212284	0.00226436	0.00353807	0.00325502	0.00367959	0.00353807	0.00523634	0.00410416	0.00580243	0.0049533	0.00665157	0.0080668	0.00976507	0.0104727	0.0131616	0.0101896	0.0202378	0.0169827	0.0239174	0.0291537	0.046844	0.0597226	0.109397
TCGA-V1-A9O5	0.00484262	0.00372509	0.00838145	0.00745018	0.00596014	0.00819519	0.00745018	0.00931272	0.00633265	0.00819519	0.00875396	0.00521512	0.00819519	0.00577389	0.0085677	0.00745018	0.00745018	0.00633265	0.0137828	0.00912647	0.00819519	0.00782269	0.00912647	0.00838145	0.0108028	0.0085677	0.0100577	0.00931272	0.010244	0.00912647	0.010244	0.0106165	0.0122928	0.012479	0.0139691	0.0122928	0.0143416	0.0121065	0.0147141	0.0115478	0.0195567	0.011734	0.021978	0.019743	0.0296145	0.0262619	0.0342708	0.0365059	0.0633265
TCGA-V1-A9O9	0.00413223	0.00609996	0.0108225	0.00590319	0.00550964	0.00570641	0.0072806	0.00669028	0.00826446	0.0072806	0.00787092	0.00846124	0.0100354	0.00747737	0.0110193	0.00826446	0.0112161	0.00747737	0.00806769	0.0123967	0.0118064	0.0102322	0.0121999	0.00865801	0.014758	0.0127902	0.0120031	0.00865801	0.0135773	0.0123967	0.0153483	0.0133806	0.0157418	0.0112161	0.0151515	0.0118064	0.0155451	0.0153483	0.0210547	0.0123967	0.0196773	0.017316	0.0196773	0.0204644	0.0267611	0.021645	0.038961	0.0358127	0.0627706
TCGA-V1-A9OA	0.00368924	0.00846354	0.00889757	0.00499132	0.00694444	0.00759549	0.0093316	0.00759549	0.0108507	0.00868056	0.00998264	0.00824653	0.0106337	0.00802951	0.0104167	0.00868056	0.0101997	0.00694444	0.0101997	0.00846354	0.00954861	0.0104167	0.0108507	0.00954861	0.00976562	0.00846354	0.0130208	0.0117188	0.0134549	0.0141059	0.0145399	0.0115017	0.015191	0.0147569	0.015625	0.0143229	0.0214844	0.0197483	0.0260417	0.0177951	0.0271267	0.0227865	0.0290799	0.0262587	0.030816	0.0271267	0.0436198	0.0334201	0.0451389
TCGA-V1-A9OF	0.000685401	0.0020562	0.00297007	0.00319854	0.0027416	0.0020562	0.00297007	0.0027416	0.00251314	0.00319854	0.00228467	0.0020562	0.003427	0.003427	0.00365547	0.00388394	0.00479781	0.00479781	0.00388394	0.003427	0.00365547	0.00319854	0.00434087	0.00388394	0.00502627	0.00502627	0.00479781	0.00502627	0.00708248	0.00502627	0.00708248	0.00388394	0.00776788	0.00982408	0.00936715	0.00959561	0.0118803	0.00822481	0.0125657	0.00913868	0.017592	0.0155358	0.0189628	0.0187343	0.0328992	0.0331277	0.0429518	0.0566598	0.093443
TCGA-V1-A9OH	0.000977517	0.00293255	0.00351906	0.00273705	0.00234604	0.00430108	0.00273705	0.00273705	0.00234604	0.00293255	0.00508309	0.00273705	0.00273705	0.00273705	0.00215054	0.00410557	0.00488759	0.00215054	0.00391007	0.00273705	0.00508309	0.00254154	0.00410557	0.00312805	0.00625611	0.00312805	0.00606061	0.00508309	0.0054741	0.00488759	0.00625611	0.00664712	0.00821114	0.00645161	0.00782014	0.00879765	0.00957967	0.00899316	0.0144673	0.0109482	0.0166178	0.0173998	0.0173998	0.0209189	0.0314761	0.0375367	0.0533724	0.058651	0.107918
TCGA-V1-A9OL	0.00279525	0.00733753	0.00733753	0.00663871	0.00349406	0.00454228	0.00628931	0.00489168	0.00733753	0.00908456	0.00873515	0.0059399	0.00733753	0.00663871	0.0059399	0.00803634	0.0101328	0.00698812	0.0104822	0.00908456	0.00943396	0.00803634	0.0125786	0.00943396	0.00698812	0.00803634	0.0125786	0.00873515	0.012928	0.0132774	0.0143256	0.012928	0.0143256	0.0136268	0.011181	0.0125786	0.0167715	0.0122292	0.0174703	0.0178197	0.0209644	0.0178197	0.0202655	0.0167715	0.0265549	0.0213138	0.0349406	0.03529	0.0607966
TCGA-V1-A9OQ	0.00225225	0.00423953	0.00569687	0.00291468	0.00569687	0.00582936	0.00569687	0.0045045	0.00609433	0.00463699	0.00582936	0.00437202	0.00503445	0.0045045	0.00609433	0.00397456	0.00662427	0.00688924	0.00688924	0.00741918	0.00768415	0.00622682	0.00887652	0.00702173	0.0082141	0.00900901	0.00993641	0.00808161	0.00993641	0.00715421	0.00993641	0.00847907	0.0108638	0.0116587	0.0155008	0.0111288	0.0170906	0.013646	0.0218601	0.0148384	0.0208002	0.0198728	0.0284844	0.0245098	0.040673	0.0340488	0.0515368	0.0604134	0.0912825
TCGA-V1-A9OT	0.000238095	0.000238095	0.000714286	0.000714286	0.00047619	0.000714286	0.000238095	0.00119048	0.00047619	0.00047619	0.00119048	0.000238095	0.000714286	0.00047619	0.00119048	0.00142857	0.00142857	0.00119048	0.000714286	0.00238095	0.00285714	0.00119048	0.00166667	0.00190476	0.00238095	0.00238095	0.00238095	0.00333333	0.00357143	0.0052381	0.00404762	0.00333333	0.005	0.00333333	0.0052381	0.00642857	0.0102381	0.00595238	0.00880952	0.0109524	0.0145238	0.0130952	0.0245238	0.017381	0.03	0.0357143	0.0604762	0.0630952	0.128333
TCGA-V1-A9OX	0	0.00158278	0.000633112	0.000949668	0.000633112	0.00126622	0.000949668	0.000633112	0.00158278	0.00158278	0.00189934	0.000633112	0.000949668	0.00189934	0.000949668	0.00126622	0.00189934	0.000633112	0.00221589	0.000949668	0.00253245	0.00221589	0.00221589	0.00379867	0.00189934	0.00221589	0.00316556	0.00189934	0.00189934	0.00253245	0.00411523	0.00379867	0.00538145	0.00411523	0.00474834	0.00601456	0.00569801	0.00506489	0.00823045	0.00696423	0.0120291	0.0148781	0.0193099	0.0208927	0.0265907	0.0275404	0.045584	0.0591959	0.129788
TCGA-V1-A9OY	0.00851064	0.0119149	0.0119149	0.0119149	0.0104965	0.0164539	0.0153191	0.0130496	0.0178723	0.0124823	0.017305	0.00964539	0.0161702	0.0144681	0.018156	0.0141844	0.0130496	0.00992908	0.0153191	0.0156028	0.018156	0.013617	0.0195745	0.0170213	0.0133333	0.013617	0.0187234	0.0153191	0.0141844	0.012766	0.0221277	0.0184397	0.0204255	0.0175887	0.0232624	0.0141844	0.0201418	0.0207092	0.0195745	0.0175887	0.0190071	0.0175887	0.0235461	0.0221277	0.0252482	0.0238298	0.0229787	0.0306383	0.0397163
TCGA-V1-A9Z7	0.000231481	0.000694444	0.00208333	0.00162037	0.00138889	0.00231481	0.00277778	0.000694444	0.00208333	0.000925926	0.00162037	0.00208333	0.0025463	0.00138889	0.00231481	0.00138889	0.00208333	0.00162037	0.00208333	0.000925926	0.00208333	0.00277778	0.00162037	0.00185185	0.0037037	0.00347222	0.00462963	0.00300926	0.0025463	0.0025463	0.00393519	0.00347222	0.00555556	0.00324074	0.00486111	0.00694444	0.00740741	0.00555556	0.00902778	0.0113426	0.0111111	0.0125	0.0145833	0.0171296	0.0236111	0.0284722	0.0430556	0.0488426	0.0967593
TCGA-V1-A9Z8	0.0022899	0.00389283	0.00320586	0.00412182	0.00423632	0.00297687	0.00572475	0.00354935	0.00446531	0.0046943	0.00389283	0.00446531	0.00446531	0.00423632	0.00538127	0.00286238	0.00423632	0.00389283	0.00561026	0.00629723	0.00629723	0.00366384	0.00652622	0.00606824	0.00721319	0.00549576	0.00801466	0.00755668	0.00744218	0.00812915	0.0104191	0.00732768	0.0100756	0.00732768	0.0121365	0.00893062	0.0136249	0.0123655	0.0167163	0.0144264	0.0208381	0.0179757	0.0271353	0.0277078	0.0333181	0.0319441	0.0499199	0.0504923	0.092512
TCGA-V1-A9Z9	0.0031663	0.00536894	0.00991189	0.00647026	0.00495595	0.0063326	0.00688326	0.00605727	0.00812225	0.00660793	0.00619493	0.00660793	0.00564427	0.00564427	0.00757159	0.00619493	0.00715859	0.00619493	0.00825991	0.00605727	0.00963656	0.00647026	0.00825991	0.00784692	0.00881057	0.00963656	0.0118392	0.00688326	0.0103249	0.00743392	0.0114262	0.00825991	0.0132159	0.00977423	0.0125275	0.0100496	0.0141795	0.0129405	0.0163822	0.0115639	0.0176211	0.0150055	0.0236784	0.0200991	0.0286344	0.027533	0.0412996	0.0421256	0.0680066
TCGA-V1-A9ZG	0.00141688	0.0020466	0.00299118	0.00299118	0.00220403	0.00283375	0.00330605	0.00377834	0.0020466	0.00267632	0.00330605	0.00251889	0.00251889	0.00236146	0.00393577	0.00377834	0.00330605	0.0040932	0.00362091	0.00283375	0.00425063	0.00314861	0.00362091	0.00283375	0.00472292	0.00330605	0.00551008	0.00362091	0.00535264	0.00362091	0.00708438	0.00535264	0.00598237	0.00503778	0.00645466	0.00771411	0.0110202	0.00708438	0.010233	0.0118073	0.0162154	0.0118073	0.019364	0.0181045	0.0280227	0.0250315	0.0472292	0.0516373	0.0985516
TCGA-V1-A9ZI	0.000395257	0.000790514	0.00395257	0.00237154	0.00118577	0.00474308	0.0055336	0.0027668	0.00197628	0.00355731	0.00237154	0.00197628	0.00395257	0.00474308	0.00237154	0.0027668	0.00513834	0.00355731	0.00474308	0.00395257	0.00711462	0.00434783	0.00355731	0.00434783	0.00592885	0.00474308	0.00592885	0.0055336	0.00869565	0.00513834	0.00632411	0.00750988	0.00790514	0.00988142	0.0114625	0.00869565	0.0142292	0.0114625	0.0118577	0.015415	0.0166008	0.0173913	0.0268775	0.029249	0.0387352	0.0403162	0.0648221	0.070751	0.127668
TCGA-V1-A9ZK	0.000533428	0.000177809	0.000355619	0.000533428	0.00106686	0.00231152	0.00160028	0.00142248	0.00124467	0.000889047	0.000889047	0.000711238	0.000711238	0.000889047	0.00124467	0.00106686	0.00124467	0.000711238	0.000889047	0.00106686	0.00106686	0.00124467	0.0019559	0.00177809	0.00177809	0.00142248	0.00160028	0.00337838	0.00160028	0.00160028	0.00391181	0.00302276	0.003734	0.00320057	0.00711238	0.00462304	0.00711238	0.00640114	0.00746799	0.00853485	0.0108464	0.0104908	0.0144026	0.0202703	0.026138	0.0304054	0.0542319	0.0661451	0.135669
TCGA-V1-A9ZR	0.00305011	0.00392157	0.00348584	0.00261438	0.00261438	0.00784314	0.00348584	0.00217865	0.00087146	0.00261438	0.00392157	0.00261438	0.00653595	0.00305011	0.00392157	0.00261438	0.00305011	0.00305011	0.0043573	0.00087146	0.00392157	0.00392157	0.00697168	0.00348584	0.00697168	0.00392157	0.00522876	0.00610022	0.00697168	0.00610022	0.0126362	0.00740741	0.0108932	0.00958606	0.011329	0.00479303	0.0139434	0.0126362	0.0135076	0.0152505	0.0200436	0.0165577	0.0287582	0.0239651	0.0331155	0.037037	0.0631808	0.0684096	0.111111
TCGA-VP-A872	0.00251477	0.00364642	0.00414938	0.00264051	0.0038979	0.00352068	0.00465233	0.0038979	0.00402364	0.00326921	0.00465233	0.00364642	0.00314347	0.00364642	0.00729285	0.00578398	0.00565824	0.00414938	0.0055325	0.00440086	0.00490381	0.00666415	0.00792154	0.00653841	0.00465233	0.00465233	0.00653841	0.00628694	0.00528103	0.00490381	0.00855023	0.00540676	0.0106878	0.00691563	0.0105621	0.00704137	0.00980762	0.0094304	0.0128253	0.0106878	0.0178549	0.0125739	0.0171005	0.0206211	0.0282912	0.025022	0.0432541	0.0490381	0.0897774
TCGA-VP-A875	0.00381888	0.00381888	0.00436443	0.00418258	0.00436443	0.00400073	0.00763775	0.00472813	0.00472813	0.00636479	0.00581924	0.00545554	0.00563739	0.00363702	0.00509183	0.00490998	0.00636479	0.00345517	0.00691035	0.00800145	0.00509183	0.00527369	0.00654664	0.00527369	0.0107292	0.0070922	0.00618294	0.00618294	0.0078196	0.00763775	0.00909256	0.0070922	0.012184	0.00618294	0.012184	0.0101837	0.0112748	0.00872886	0.0114566	0.0109111	0.0163666	0.0120022	0.017094	0.0181851	0.0227314	0.0223677	0.0330969	0.040371	0.0681942
TCGA-VP-A876	0.00198784	0.00362488	0.00362488	0.0025725	0.00409261	0.00409261	0.00374181	0.00315716	0.00409261	0.0025725	0.00467727	0.00374181	0.00444341	0.00350795	0.00491113	0.00432647	0.00362488	0.00362488	0.00444341	0.00444341	0.00374181	0.00502806	0.00526193	0.00467727	0.00713283	0.00385875	0.00666511	0.00619738	0.00689897	0.00456034	0.0095884	0.00760056	0.0109916	0.00830215	0.0140318	0.00923761	0.0128625	0.0107577	0.0132133	0.0155519	0.0208138	0.0206969	0.0286483	0.0252572	0.0380028	0.0377689	0.0561272	0.0636109	0.118569
TCGA-VP-A878	0.00101249	0.00101249	0.00337496	0.00151873	0.00219372	0.00354371	0.00151873	0.00236247	0.00219372	0.00303746	0.00168748	0.00168748	0.00219372	0.00286871	0.00320621	0.00371245	0.00236247	0.00236247	0.00354371	0.00168748	0.00269997	0.00286871	0.0038812	0.00269997	0.00354371	0.00219372	0.00337496	0.00320621	0.00320621	0.00320621	0.00590618	0.00354371	0.00455619	0.0042187	0.00607492	0.00607492	0.0080999	0.00793115	0.00793115	0.00759366	0.0123186	0.00877489	0.0155248	0.0153561	0.0242997	0.0226122	0.041512	0.0442119	0.0926426
TCGA-VP-A879	0.000985869	0.00197174	0.00328623	0.00197174	0.00197174	0.00262898	0.00361485	0.00394348	0.000328623	0.00328623	0.00394348	0.00197174	0.00197174	0.00230036	0.00361485	0.00295761	0.00525797	0.00164312	0.00591522	0.00361485	0.00394348	0.00460072	0.00460072	0.00262898	0.00624384	0.00492935	0.00722971	0.00591522	0.00722971	0.00394348	0.0111732	0.00591522	0.00985869	0.00821558	0.0144594	0.00953007	0.0111732	0.014788	0.0138022	0.0131449	0.0203746	0.0187315	0.0345054	0.0276043	0.0397634	0.0391061	0.0535656	0.057509	0.110417
TCGA-VP-A87B	0.00195389	0.00234467	0.00234467	0.00156311	0.00312622	0.00390778	0.00195389	0.00234467	0.003517	0.00234467	0.00312622	0.00429855	0.00390778	0.00234467	0.00390778	0.00312622	0.003517	0.003517	0.00508011	0.00312622	0.00508011	0.003517	0.00390778	0.00429855	0.007034	0.00429855	0.00468933	0.00937866	0.00742478	0.00312622	0.00937866	0.00664322	0.00859711	0.010551	0.0113326	0.0121141	0.0132864	0.00976944	0.0195389	0.0125049	0.0238374	0.0179758	0.0300899	0.028136	0.0425948	0.0441579	0.066823	0.0621336	0.112153
TCGA-VP-A87C	0.00144485	0.00112378	0.00337133	0.00128432	0.00176593	0.00160539	0.00321079	0.00305025	0.00224755	0.00176593	0.00240809	0.00128432	0.00337133	0.00192647	0.00385295	0.00208701	0.00288971	0.00240809	0.00224755	0.00176593	0.00288971	0.00256863	0.00337133	0.00385295	0.00481618	0.00385295	0.00369241	0.00337133	0.00642158	0.00417402	0.0061005	0.00465564	0.00593996	0.00658212	0.0052978	0.00706373	0.00947183	0.00995344	0.0134853	0.0109167	0.0166961	0.0158934	0.022315	0.0219939	0.0325895	0.0362819	0.055065	0.0627709	0.119441
TCGA-VP-A87D	0.00207436	0.00175523	0.00367002	0.00223392	0.00255306	0.00351045	0.00335089	0.00191479	0.00414872	0.00255306	0.00335089	0.00287219	0.00367002	0.00143609	0.00351045	0.00239349	0.00335089	0.00398915	0.00462741	0.00462741	0.00382958	0.00446785	0.00558481	0.00398915	0.00351045	0.00430828	0.00510611	0.00414872	0.00574438	0.00382958	0.00813787	0.00526568	0.00973352	0.00670177	0.00829743	0.00909526	0.0100527	0.00861656	0.0108505	0.013244	0.0175523	0.0175523	0.0186692	0.0186692	0.0347854	0.029041	0.0475507	0.0518589	0.0978139
TCGA-VP-A87E	0.00265211	0.00468019	0.00468019	0.00483619	0.00358814	0.00530421	0.00561622	0.00468019	0.00624025	0.00546022	0.00468019	0.00421217	0.00655226	0.00514821	0.00436817	0.00561622	0.00780031	0.00592824	0.00655226	0.00670827	0.00639626	0.0049922	0.00826833	0.00655226	0.00764431	0.00795632	0.00936037	0.00826833	0.0102964	0.00655226	0.0106084	0.00842434	0.0107644	0.00780031	0.0113885	0.00889236	0.0154446	0.0120125	0.0179407	0.0190328	0.0283931	0.0230889	0.0282371	0.0288612	0.0407176	0.0336973	0.0567863	0.0588144	0.0887676
TCGA-VP-A87H	0.00161812	0.00404531	0.00444984	0.00303398	0.00323625	0.00343851	0.00444984	0.00384304	0.00404531	0.00485437	0.00404531	0.00364078	0.00384304	0.00404531	0.00384304	0.00323625	0.00627023	0.00444984	0.00323625	0.00364078	0.00627023	0.0052589	0.00485437	0.0052589	0.00687702	0.00485437	0.00788835	0.00444984	0.00788835	0.0058657	0.00687702	0.00485437	0.00849515	0.0101133	0.00970874	0.00788835	0.0105178	0.0109223	0.0125405	0.0147654	0.0141586	0.009911	0.0216424	0.0214401	0.0315534	0.0285194	0.046521	0.0562298	0.0914239
TCGA-VP-A87J	0.00347095	0.00365364	0.00347095	0.00365364	0.00438436	0.00438436	0.00255754	0.00219218	0.00383632	0.00310559	0.00328827	0.00255754	0.00474973	0.00219218	0.00474973	0.00456704	0.00511509	0.00237486	0.00529777	0.00328827	0.00328827	0.00328827	0.00420168	0.00292291	0.00328827	0.00438436	0.00584582	0.00365364	0.00639386	0.00237486	0.00548045	0.00511509	0.00858604	0.00657654	0.00748995	0.00748995	0.00858604	0.00895141	0.00949945	0.0107782	0.0137011	0.00858604	0.0169894	0.0182682	0.0261235	0.0233833	0.0456704	0.0480453	0.100292
TCGA-VP-A87K	0.00100435	0.00502176	0.00569133	0.00267827	0.0063609	0.00468698	0.00301306	0.00334784	0.0063609	0.00234349	0.00870439	0.00401741	0.00602611	0.00602611	0.00435219	0.00368262	0.00535655	0.0063609	0.00669568	0.00468698	0.0063609	0.0063609	0.00770003	0.00669568	0.0063609	0.00736525	0.0103783	0.00770003	0.0063609	0.00870439	0.00870439	0.0103783	0.0113827	0.00870439	0.0107131	0.0120522	0.0164044	0.0113827	0.0210914	0.0100435	0.0220957	0.0177436	0.0251088	0.0207566	0.0398393	0.0321393	0.049548	0.0502176	0.103448
TCGA-VP-AA1N	0.00424689	0.00481314	0.00481314	0.00679502	0.00849377	0.00509626	0.00792752	0.00707814	0.00736127	0.00736127	0.00906002	0.00368063	0.00651189	0.0087769	0.00764439	0.00537939	0.0104757	0.00396376	0.00821065	0.00764439	0.0116082	0.00962627	0.0101925	0.00934315	0.00764439	0.0121744	0.0121744	0.0104757	0.0104757	0.00906002	0.011325	0.00962627	0.0206682	0.0124575	0.0169875	0.01359	0.0192525	0.0138732	0.0184032	0.0169875	0.0263307	0.01812	0.0218007	0.0251982	0.0379388	0.0334088	0.0436014	0.0467157	0.0846546
TCGA-WW-A8ZI	0.00131634	0.00235555	0.00277123	0.00242483	0.00256339	0.00304836	0.00294444	0.00294444	0.00332548	0.00263267	0.00346404	0.00242483	0.00356796	0.00218235	0.00381045	0.00259803	0.00297908	0.00311764	0.00394901	0.0029098	0.00433005	0.00349868	0.00401829	0.00408757	0.00547319	0.00419149	0.00523071	0.00478038	0.00533463	0.0048843	0.0066856	0.00575031	0.00647776	0.0063392	0.00886795	0.00751697	0.0105307	0.00911043	0.0119509	0.0115699	0.0164196	0.0156228	0.0208882	0.0223777	0.0317306	0.0337398	0.0578149	0.0661979	0.127858
TCGA-X4-A8KQ	0.00186212	0.00338016	0.003704	0.00323847	0.00342064	0.003704	0.00354208	0.00348136	0.00325871	0.00348136	0.00358256	0.00279318	0.00378497	0.0036028	0.00406833	0.00313727	0.00421001	0.00342064	0.00416953	0.00374448	0.00451362	0.0045541	0.00560661	0.00437194	0.00497915	0.00465531	0.00552564	0.00526252	0.00682103	0.00603166	0.00746873	0.00682103	0.00833907	0.00835931	0.00999879	0.00898676	0.0120836	0.0108894	0.0145731	0.0130146	0.0186617	0.0169008	0.0232765	0.0224062	0.034004	0.0335992	0.0533741	0.0591021	0.108792
TCGA-X4-A8KS	0.000803511	0.00154521	0.0014834	0.00154521	0.00154521	0.0014834	0.00191606	0.00179245	0.00135979	0.00154521	0.00191606	0.00166883	0.00179245	0.0014216	0.0021633	0.000927128	0.00203968	0.00241053	0.002905	0.00173064	0.00210149	0.00222511	0.00278138	0.00253415	0.00271957	0.00296681	0.00327585	0.00228692	0.00352309	0.00451202	0.00383213	0.00383213	0.00457383	0.00420298	0.00581	0.0050683	0.00778787	0.00784968	0.00939489	0.00673713	0.0114346	0.0122381	0.0183571	0.0186662	0.0238581	0.0270721	0.0422152	0.0521664	0.104024
TCGA-XA-A8JR	0.00417711	0.00793651	0.0100251	0.00584795	0.00793651	0.0100251	0.0100251	0.00710109	0.00668338	0.00543024	0.00835422	0.00501253	0.0112782	0.00710109	0.0075188	0.0112782	0.0112782	0.00960735	0.0112782	0.0104428	0.0137845	0.00960735	0.0104428	0.0116959	0.0137845	0.00835422	0.0100251	0.00877193	0.0150376	0.0104428	0.00835422	0.0075188	0.0108605	0.0125313	0.0146199	0.0142022	0.0150376	0.012949	0.0171261	0.0104428	0.021721	0.015873	0.0208855	0.0221387	0.0367586	0.0229741	0.0413534	0.037594	0.0680869
TCGA-XJ-A83F	0.00639269	0.0103501	0.00913242	0.00639269	0.0100457	0.00669711	0.0118721	0.00761035	0.0103501	0.00882801	0.00913242	0.00852359	0.0112633	0.0112633	0.0109589	0.0112633	0.00852359	0.0109589	0.0106545	0.0109589	0.0109589	0.00852359	0.0112633	0.00974125	0.0121766	0.0115677	0.0109589	0.00913242	0.0121766	0.0100457	0.0121766	0.0127854	0.0136986	0.00943683	0.0158295	0.0149163	0.0133942	0.0112633	0.0240487	0.0152207	0.0234399	0.0191781	0.0252664	0.017656	0.0298326	0.0298326	0.0432268	0.0432268	0.0757991
TCGA-XJ-A83G	0.00735294	0.00991049	0.0092711	0.0105499	0.015665	0.0102302	0.00959079	0.0111893	0.0108696	0.00895141	0.0159847	0.0092711	0.0105499	0.0111893	0.0102302	0.0147059	0.00991049	0.00735294	0.00799233	0.00767263	0.012468	0.00991049	0.0121483	0.00959079	0.0121483	0.0102302	0.0127877	0.00959079	0.0102302	0.00991049	0.0111893	0.0102302	0.0147059	0.0118286	0.0147059	0.0134271	0.015665	0.0143862	0.0179028	0.012468	0.0246164	0.0169437	0.0329284	0.0236573	0.0306905	0.0361253	0.0431586	0.0578645	0.0824808
TCGA-XJ-A83H	0.00172414	0.00241379	0.00517241	0.00275862	0.00310345	0.00344828	0.00517241	0.00344828	0.00551724	0.00275862	0.00206897	0.00172414	0.00586207	0.0037931	0.00482759	0.00517241	0.00586207	0.00689655	0.00862069	0.00448276	0.00965517	0.00655172	0.00655172	0.00724138	0.00931034	0.00551724	0.00793103	0.01	0.0113793	0.00827586	0.0110345	0.0113793	0.0175862	0.017931	0.0148276	0.0175862	0.017931	0.0224138	0.03	0.0234483	0.0324138	0.0296552	0.0455172	0.0351724	0.0531034	0.0558621	0.0806897	0.0662069	0.1
TCGA-XJ-A9DI	0.00263158	0.0037594	0.00338346	0.00225564	0.00300752	0.00263158	0.00150376	0.00300752	0.00526316	0.00338346	0.0037594	0.00300752	0.00300752	0.0018797	0.0037594	0.00451128	0.00300752	0.00338346	0.00338346	0.0056391	0.00451128	0.00413534	0.00488722	0.00601504	0.00676692	0.00451128	0.00526316	0.00451128	0.00827068	0.00639098	0.00676692	0.0075188	0.0075188	0.0056391	0.0101504	0.0101504	0.012782	0.0154135	0.0191729	0.0184211	0.0278195	0.0233083	0.0263158	0.0315789	0.0511278	0.0548872	0.0691729	0.0725564	0.120301
TCGA-XJ-A9DK	0.00355714	0.0053357	0.00711427	0.00622499	0.00933748	0.00622499	0.00711427	0.00800356	0.00578035	0.00489106	0.00489106	0.00311249	0.00933748	0.0111161	0.00755892	0.00489106	0.00711427	0.00933748	0.0102268	0.00800356	0.0111161	0.0084482	0.0102268	0.0106714	0.0115607	0.00666963	0.00711427	0.0102268	0.0111161	0.0128946	0.0182303	0.0111161	0.00978213	0.00933748	0.0120053	0.0146732	0.0177857	0.0168964	0.0151178	0.0191196	0.0311249	0.0266785	0.0333482	0.0306803	0.0426856	0.0431303	0.0644731	0.0666963	0.100934
TCGA-XJ-A9DQ	0.000772947	0.00173913	0.00115942	0.00135266	0.00173913	0.0021256	0.0021256	0.00135266	0.00154589	0.00173913	0.00173913	0.000966184	0.00154589	0.000966184	0.0021256	0.00115942	0.00270531	0.00193237	0.00173913	0.000966184	0.00289855	0.00193237	0.00328502	0.00173913	0.00444444	0.00289855	0.00444444	0.00309179	0.0036715	0.00444444	0.00541063	0.0036715	0.00463768	0.00637681	0.00676329	0.00637681	0.0100483	0.00811594	0.0121739	0.00850242	0.0152657	0.0129469	0.022029	0.0202899	0.0351691	0.035942	0.0577778	0.066087	0.129855
TCGA-XJ-A9DX	0.00191939	0.00230326	0.00326296	0.00307102	0.00383877	0.0024952	0.00537428	0.00345489	0.00537428	0.00326296	0.00441459	0.00479846	0.00230326	0.00383877	0.0024952	0.00479846	0.00364683	0.00326296	0.00556622	0.00614203	0.0059501	0.00441459	0.00537428	0.00345489	0.00575816	0.00518234	0.0059501	0.00710173	0.00690979	0.00729367	0.0103647	0.00825336	0.0084453	0.0084453	0.0136276	0.0105566	0.0153551	0.00998081	0.0174664	0.0138196	0.0230326	0.0236084	0.0333973	0.0326296	0.0452975	0.0495202	0.0740883	0.0785029	0.124376
TCGA-XK-AAIR	0.010989	0.0175824	0.0175824	0.0197802	0.0208791	0.00989011	0.021978	0.0164835	0.0131868	0.0142857	0.0186813	0.0186813	0.0230769	0.0208791	0.021978	0.0208791	0.0208791	0.021978	0.0252747	0.0153846	0.0208791	0.0186813	0.0263736	0.0164835	0.0208791	0.0208791	0.0175824	0.021978	0.0230769	0.0131868	0.0197802	0.0175824	0.0252747	0.0164835	0.0131868	0.0142857	0.0164835	0.0208791	0.0164835	0.0230769	0.021978	0.0142857	0.0186813	0.00549451	0.0164835	0.0153846	0.0307692	0.0186813	0.0395604
TCGA-XK-AAIV	0.00713012	0.0136661	0.0112894	0.0148544	0.010101	0.0184195	0.0148544	0.0154486	0.0124777	0.016637	0.0219846	0.0172311	0.0184195	0.016637	0.0190137	0.0154486	0.0237671	0.0219846	0.0154486	0.0172311	0.0196078	0.0112894	0.0207962	0.0154486	0.0273321	0.00713012	0.0285205	0.020202	0.0196078	0.016637	0.0261438	0.020202	0.0249554	0.0154486	0.026738	0.0142602	0.0261438	0.016637	0.020202	0.0190137	0.0213904	0.0160428	0.0178253	0.0130719	0.0219846	0.0160428	0.0207962	0.0219846	0.030303
TCGA-XK-AAIW	0.0117188	0.0175781	0.0169271	0.0130208	0.014974	0.0234375	0.0227865	0.0143229	0.015625	0.0169271	0.0182292	0.0136719	0.015625	0.0195312	0.0208333	0.0195312	0.015625	0.0175781	0.0182292	0.015625	0.0130208	0.0130208	0.0208333	0.0143229	0.0182292	0.016276	0.0208333	0.016276	0.0195312	0.014974	0.015625	0.016276	0.0169271	0.014974	0.0208333	0.0214844	0.0214844	0.00846354	0.0201823	0.016276	0.0325521	0.0253906	0.0240885	0.0208333	0.0279948	0.0208333	0.0371094	0.030599	0.0397135
TCGA-XK-AAJ3	0.00365297	0.0100457	0.0109589	0.0155251	0.00913242	0.0109589	0.0164384	0.00639269	0.0136986	0.0118721	0.0127854	0.0173516	0.0210046	0.0155251	0.0182648	0.0127854	0.0191781	0.0109589	0.0118721	0.0109589	0.0155251	0.0136986	0.0146119	0.0109589	0.0237443	0.0109589	0.0182648	0.0146119	0.0164384	0.0182648	0.0191781	0.0146119	0.0182648	0.0109589	0.030137	0.0146119	0.0155251	0.0246575	0.0136986	0.0164384	0.0246575	0.0273973	0.026484	0.0273973	0.0429224	0.0410959	0.0593607	0.0493151	0.060274
TCGA-XK-AAJA	0.00890736	0.0207838	0.0172209	0.0154394	0.0166271	0.0231591	0.0172209	0.0225653	0.0184086	0.0225653	0.0225653	0.0190024	0.0219715	0.0160333	0.0195962	0.0118765	0.0231591	0.0160333	0.0225653	0.0190024	0.0225653	0.0184086	0.0207838	0.0195962	0.0213777	0.013658	0.0213777	0.0184086	0.0207838	0.0124703	0.0172209	0.0178147	0.0243468	0.0154394	0.02019	0.013658	0.0225653	0.0142518	0.0207838	0.0142518	0.0261283	0.0219715	0.02019	0.0130641	0.02019	0.0148456	0.0279097	0.0178147	0.0267221
TCGA-XK-AAJP	0.0035	0.0065	0.009	0.0055	0.006	0.008	0.0115	0.006	0.011	0.0085	0.0075	0.004	0.0125	0.0085	0.0095	0.007	0.01	0.009	0.0105	0.0055	0.0075	0.007	0.0075	0.006	0.0065	0.0025	0.006	0.0055	0.004	0.006	0.003	0.003	0.002	0.002	0.0035	0.0035	0.004	0.0015	0.0065	0.0025	0.005	0.0035	0.005	0.002	0.005	0.005	0.0065	0.0115	0.017
TCGA-XK-AAJR	0.0101483	0.019516	0.0218579	0.0140515	0.0148322	0.0187354	0.0218579	0.0249805	0.0132709	0.0163934	0.0163934	0.0210773	0.0296643	0.0124902	0.0156128	0.0171741	0.0163934	0.0156128	0.0179547	0.0140515	0.0226386	0.0132709	0.0187354	0.0148322	0.0163934	0.0101483	0.0163934	0.0148322	0.0171741	0.0171741	0.0101483	0.0101483	0.0124902	0.00936768	0.0117096	0.0101483	0.00936768	0.0101483	0.0140515	0.00936768	0.0241998	0.0156128	0.0156128	0.0156128	0.019516	0.0187354	0.019516	0.0257611	0.0546448
TCGA-XK-AAJT	0.00287081	0.00191388	0.000956938	0.00191388	0.00287081	0.00382775	0.00191388	0.00669856	0.000956938	0.00669856	0.00574163	0.00382775	0.00382775	0.00287081	0.00287081	0.00382775	0.00287081	0.00287081	0.00574163	0.000956938	0.00287081	0.00382775	0.00382775	0.00287081	0.00478469	0.00478469	0.00574163	0.00574163	0.00669856	0.00861244	0.00478469	0.00478469	0.0076555	0.00574163	0.00956938	0.00478469	0.0143541	0.00478469	0.00861244	0.0114833	0.0162679	0.0076555	0.0162679	0.0162679	0.0210526	0.0248804	0.0325359	0.0449761	0.0698565
TCGA-XK-AAJU	0.00101667	0.00183001	0.00101667	0.00244002	0.00203335	0.00223668	0.00162668	0.00345669	0.00203335	0.00203335	0.00183001	0.00284669	0.00406669	0.00142334	0.00183001	0.00264335	0.00203335	0.00406669	0.00244002	0.00162668	0.00345669	0.00406669	0.00386336	0.00325336	0.00549004	0.00366002	0.00671004	0.00630338	0.00772672	0.00325336	0.00772672	0.00630338	0.00732005	0.00752338	0.00793005	0.00915006	0.0093534	0.0099634	0.0132168	0.0111834	0.0170801	0.0160634	0.0227735	0.0256202	0.0351769	0.0309069	0.0490037	0.0544937	0.0961773
TCGA-XK-AAK1	0.0101266	0.0202532	0.0227848	0.0151899	0.0227848	0.00759494	0.0253165	0.0379747	0.0151899	0.0126582	0.0278481	0.0278481	0.0253165	0.0126582	0.0151899	0.0278481	0.0253165	0.0227848	0.0278481	0.0151899	0.0126582	0.0177215	0.0177215	0.00506329	0.0101266	0.0177215	0.0151899	0.0101266	0.0151899	0.0101266	0.0101266	0.00759494	0.0227848	0.00506329	0.0177215	0.0253165	0.0177215	0.0101266	0.0278481	0.0126582	0.0101266	0.0101266	0.0227848	0.0126582	0.00759494	0.0278481	0.0278481	0.0101266	0.0227848
TCGA-XQ-A8TA	0.00256504	0.0053133	0.00476365	0.00403078	0.00467204	0.00503848	0.0053133	0.00448882	0.00503848	0.00494687	0.00522169	0.00448882	0.00522169	0.00366435	0.00604617	0.00577134	0.006321	0.00540491	0.00522169	0.00430561	0.00613778	0.00494687	0.00778674	0.00513008	0.00558813	0.00503848	0.00705387	0.00613778	0.00723708	0.00622939	0.00650421	0.00641261	0.00677904	0.00687065	0.0085196	0.00586295	0.0109014	0.00833639	0.0116343	0.00934408	0.0114511	0.010993	0.0165812	0.014749	0.023177	0.0217112	0.0357274	0.0414987	0.0869366
TCGA-XQ-A8TB	0.000545058	0.00163517	0.0025436	0.00109012	0.0025436	0.00218023	0.0025436	0.00290698	0.00181686	0.0025436	0.0025436	0.00308866	0.00308866	0.00199855	0.00363372	0.00218023	0.0025436	0.00327035	0.00454215	0.00472384	0.00345203	0.0025436	0.00399709	0.00236192	0.00399709	0.00363372	0.00599564	0.0052689	0.00563227	0.00617733	0.00617733	0.00472384	0.00744913	0.00545058	0.00835756	0.00763081	0.0109012	0.00981105	0.0138081	0.0119913	0.0150799	0.0170785	0.024891	0.0203488	0.0308866	0.037064	0.0568677	0.0632267	0.118278
TCGA-Y6-A8TL	0.0018543	0.00384106	0.00596026	0.00331126	0.00291391	0.00688742	0.00490066	0.00476821	0.00569536	0.00490066	0.00543046	0.00529801	0.00556291	0.00476821	0.00688742	0.00569536	0.00529801	0.00688742	0.00529801	0.00662252	0.00675497	0.00569536	0.00794702	0.00529801	0.00649007	0.00741722	0.00847682	0.00635762	0.00874172	0.00688742	0.00874172	0.00834437	0.00953642	0.00662252	0.00993377	0.00874172	0.0115232	0.013245	0.0127152	0.0107285	0.0164238	0.0150993	0.0198675	0.0168212	0.0260927	0.0223841	0.0352318	0.0360265	0.0695364
TCGA-Y6-A9XI	0.00146078	0.00204509	0.00287286	0.00277548	0.00238594	0.00214247	0.0026294	0.00248332	0.00258071	0.00321371	0.00360325	0.00238594	0.00223986	0.00253202	0.00272679	0.0026294	0.00292156	0.00311633	0.00384672	0.00272679	0.00423626	0.00311633	0.00399279	0.00365195	0.00345717	0.00374933	0.00428495	0.0032624	0.0045771	0.00472318	0.00574573	0.00438233	0.00642742	0.0052588	0.00720651	0.0059405	0.00959244	0.00754735	0.0103715	0.0100794	0.0140235	0.0114915	0.0189414	0.017578	0.026294	0.0241028	0.0391975	0.044359	0.0894483
TCGA-YL-A8HJ	0.00128139	0.00281907	0.00461302	0.00205023	0.0035879	0.0035879	0.00333162	0.00333162	0.00384418	0.00256279	0.0048693	0.00461302	0.00589441	0.00153767	0.0048693	0.00230651	0.00538186	0.0035879	0.0048693	0.00256279	0.00615069	0.00512558	0.00563813	0.00563813	0.00666325	0.00563813	0.00820092	0.00512558	0.00794464	0.00666325	0.00640697	0.00666325	0.0102512	0.00794464	0.01102	0.00896976	0.0135828	0.0120451	0.0158893	0.0148642	0.0228088	0.0217837	0.0274218	0.0287032	0.0386981	0.04408	0.0612506	0.0712455	0.129165
TCGA-YL-A8HK	0.0037389	0.0074778	0.00560835	0.00825674	0.00887989	0.0074778	0.00810095	0.00638729	0.00778938	0.00560835	0.00965883	0.0074778	0.00716623	0.00529678	0.0087241	0.00841253	0.00965883	0.00591993	0.00716623	0.00841253	0.00856831	0.00825674	0.0107493	0.00778938	0.00950304	0.00856831	0.0127746	0.00732201	0.0118399	0.0113725	0.014644	0.0132419	0.0116841	0.0116841	0.015423	0.014644	0.0147998	0.015423	0.0199408	0.0179156	0.0202524	0.0216545	0.0277302	0.0208755	0.0333385	0.0294438	0.0475152	0.0415953	0.0655865
TCGA-YL-A8HL	0.00361181	0.00392588	0.00486809	0.00518216	0.00298367	0.00502513	0.00549623	0.00423995	0.00565327	0.0053392	0.00628141	0.00471106	0.00549623	0.00329774	0.00518216	0.00392588	0.00502513	0.00486809	0.00722362	0.00596734	0.00753769	0.0053392	0.0058103	0.0053392	0.00785176	0.00486809	0.00643844	0.00628141	0.00989322	0.00675251	0.00973618	0.00879397	0.0114636	0.00879397	0.0125628	0.013191	0.0117776	0.0119347	0.0166457	0.013505	0.0204146	0.0166457	0.0218279	0.0279523	0.0329774	0.031093	0.0480528	0.0530779	0.0957915
TCGA-YL-A8HM	0.00522388	0.00485075	0.00634328	0.00895522	0.00708955	0.00746269	0.00970149	0.00746269	0.00746269	0.00485075	0.00746269	0.00746269	0.00783582	0.00932836	0.00783582	0.00895522	0.00932836	0.00597015	0.00858209	0.00746269	0.011194	0.00820896	0.00746269	0.00447761	0.00970149	0.00895522	0.0115672	0.00932836	0.0145522	0.011194	0.0141791	0.0134328	0.0134328	0.0126866	0.016791	0.013806	0.0179104	0.0123134	0.0205224	0.0152985	0.0264925	0.025	0.0208955	0.0201493	0.0347015	0.0358209	0.0544776	0.0488806	0.0951493
TCGA-YL-A8S8	0.00158205	0.00417086	0.00330792	0.00445851	0.00359557	0.00359557	0.00445851	0.00359557	0.00373939	0.00460233	0.00575291	0.0031641	0.00402704	0.00345175	0.0050338	0.00517762	0.0063282	0.00445851	0.00488998	0.00488998	0.00417086	0.00402704	0.00805408	0.00517762	0.0050338	0.00532144	0.00647203	0.00575291	0.00618438	0.00488998	0.00920466	0.00834172	0.00949231	0.0103552	0.00805408	0.0103552	0.00977995	0.0112182	0.0161082	0.0115058	0.013807	0.0149576	0.0198475	0.0218611	0.0312095	0.0296275	0.0431468	0.0496189	0.0867252
TCGA-YL-A8S9	0.00147493	0.00324484	0.00265487	0.00353982	0.00147493	0.00265487	0.00442478	0.00383481	0.00589971	0.00324484	0.00589971	0.0020649	0.00442478	0.00265487	0.00560472	0.00324484	0.00530973	0.00294985	0.00619469	0.00471976	0.00471976	0.00294985	0.00648968	0.00560472	0.00619469	0.00501475	0.00943953	0.00619469	0.00914454	0.00619469	0.0100295	0.00619469	0.0132743	0.0079646	0.0120944	0.00825959	0.0147493	0.00973451	0.0138643	0.0138643	0.019174	0.020649	0.0309735	0.0253687	0.0348083	0.0303835	0.0631268	0.0471976	0.0920354
TCGA-YL-A8SA	0.00319729	0.00432575	0.00959188	0.00827534	0.00808727	0.00714689	0.00846342	0.00846342	0.00808727	0.00639458	0.0110965	0.00658266	0.00883957	0.00677074	0.0086515	0.00771112	0.00977995	0.00789919	0.00959188	0.00808727	0.0094038	0.00695881	0.00921572	0.0101561	0.0116607	0.00846342	0.0141057	0.0094038	0.0159865	0.0120369	0.0150461	0.0116607	0.0171149	0.0137295	0.0184314	0.0141057	0.0174911	0.0139176	0.0229453	0.0220049	0.0257664	0.0212526	0.0338537	0.0342298	0.0402483	0.037051	0.0517209	0.0528494	0.0746662
TCGA-YL-A8SB	0.00200328	0.0045529	0.00236751	0.00400656	0.00437079	0.00382444	0.00473502	0.00364232	0.00528137	0.00327809	0.00509925	0.00400656	0.0045529	0.00346021	0.0045529	0.00364232	0.00528137	0.0056456	0.0056456	0.00364232	0.00509925	0.00546349	0.00655618	0.00528137	0.00637407	0.00528137	0.0067383	0.00491714	0.00855946	0.00947004	0.00983427	0.0067383	0.00983427	0.00746676	0.0111091	0.00983427	0.0136587	0.0120197	0.0180295	0.0158441	0.0216718	0.0158441	0.0267711	0.0267711	0.0366054	0.0402477	0.0546349	0.0710253	0.114915
TCGA-YL-A8SC	0.00364631	0.00638104	0.00546946	0.00432999	0.0077484	0.00706472	0.00820419	0.0077484	0.00820419	0.00615314	0.0102552	0.00752051	0.00888788	0.00843209	0.00888788	0.0077484	0.00934366	0.00888788	0.00888788	0.0077484	0.0109389	0.00820419	0.0102552	0.00865998	0.00843209	0.00706472	0.0118505	0.0104831	0.0148131	0.0136737	0.0159526	0.0113947	0.0191431	0.0161805	0.0195989	0.0143573	0.0195989	0.0170921	0.0248405	0.0209663	0.0303099	0.0289426	0.0337284	0.0316773	0.0437557	0.0353236	0.0544667	0.0530994	0.0722425
TCGA-YL-A8SF	0.00263399	0.00515346	0.00721484	0.00343564	0.00503894	0.00584059	0.0085891	0.00595511	0.0053825	0.00423729	0.00664224	0.00458085	0.00595511	0.0053825	0.00606963	0.00675676	0.00801649	0.0053825	0.00675676	0.00778745	0.00813101	0.00675676	0.00755841	0.00675676	0.00767293	0.0069858	0.0103069	0.00836005	0.00870362	0.0091617	0.0119102	0.010536	0.0113376	0.010536	0.0124828	0.0116812	0.0135135	0.0150023	0.0170637	0.0154604	0.0207284	0.018667	0.0275996	0.0261109	0.0338983	0.0343564	0.0458085	0.0482135	0.0756986
TCGA-YL-A8SH	0.00170261	0.00220709	0.00425653	0.0029638	0.00293227	0.00264851	0.00343675	0.00312145	0.00321604	0.00346828	0.00365746	0.00302686	0.00378358	0.00308992	0.00381511	0.00305839	0.00375205	0.00315298	0.00419347	0.00337369	0.00435112	0.0032791	0.00400429	0.00375205	0.00472947	0.00472947	0.00526548	0.00479253	0.00554925	0.00517089	0.00643208	0.00472947	0.00621138	0.00649514	0.00709421	0.00608526	0.00819776	0.00646361	0.00971119	0.00964813	0.0114769	0.0101841	0.0145353	0.0133686	0.0163955	0.0183504	0.0270526	0.0271787	0.0464434
TCGA-YL-A8SI	0.00109625	0.00158956	0.00268581	0.00169919	0.0021925	0.00235694	0.00230213	0.00197325	0.00208288	0.00246656	0.0030695	0.00290506	0.00208288	0.00274063	0.0021925	0.0030695	0.002631	0.00279544	0.00290506	0.00257619	0.003508	0.0030695	0.00361763	0.00235694	0.00339838	0.00328875	0.00520719	0.00383688	0.00405613	0.00422057	0.00553607	0.00460425	0.00630344	0.00443982	0.006139	0.00581013	0.00679676	0.00586494	0.00942776	0.00778338	0.0100855	0.0105788	0.014032	0.0138128	0.0173208	0.019897	0.028941	0.028667	0.0560184
TCGA-YL-A8SJ	0.000544493	0.00142605	0.0018409	0.00140012	0.00142605	0.00158162	0.0020224	0.00140012	0.00129641	0.00132234	0.00186683	0.00191869	0.00199647	0.00142605	0.0022039	0.00142605	0.00215204	0.00176312	0.00199647	0.00181498	0.00222983	0.00210019	0.00272246	0.00256689	0.00290396	0.00186683	0.00272246	0.00230761	0.00290396	0.00277432	0.00362995	0.00316324	0.00378552	0.00337067	0.00503008	0.00448558	0.00598942	0.00534122	0.00764883	0.0066117	0.00954159	0.00783033	0.0118492	0.0114084	0.0158162	0.0182275	0.0251763	0.0265764	0.0471894
TCGA-YL-A8SK	0.00209966	0.00489922	0.00608903	0.00517917	0.00608903	0.00461926	0.00552912	0.00720885	0.00601904	0.00601904	0.00734882	0.00538914	0.00629899	0.00419933	0.00797872	0.00566909	0.00615901	0.00433931	0.00643897	0.00587906	0.00804871	0.00566909	0.00762878	0.00657895	0.00650896	0.00517917	0.00587906	0.00615901	0.00734882	0.00657895	0.00734882	0.0074888	0.00790873	0.0068589	0.00853863	0.00902856	0.00853863	0.00783875	0.0112682	0.00909854	0.0116881	0.00965845	0.0133679	0.0131579	0.0174272	0.0150476	0.0216965	0.0214166	0.0359043
TCGA-YL-A8SL	0.00226791	0.00321041	0.004418	0.00326932	0.00341659	0.00379948	0.00456527	0.00344604	0.00344604	0.00362276	0.00409402	0.00326932	0.00382893	0.00297479	0.0048009	0.00374057	0.0043591	0.00359331	0.00412347	0.00341659	0.00518379	0.00347549	0.00553723	0.0043591	0.00477144	0.00412347	0.00550778	0.00438855	0.00550778	0.0048598	0.0061852	0.00559614	0.00674482	0.00527215	0.00765787	0.00627356	0.00842366	0.00645028	0.00942507	0.00827639	0.0104559	0.00951343	0.0134013	0.0113984	0.0155219	0.0147561	0.0232681	0.0234449	0.0425306
TCGA-YL-A8SO	0.00431717	0.00474888	0.00575622	0.00546841	0.00388545	0.00633185	0.00748309	0.00575622	0.00575622	0.00532451	0.00690747	0.0050367	0.00618794	0.00618794	0.0050367	0.00590013	0.00849043	0.00661966	0.00863434	0.0050367	0.00992949	0.00647575	0.0100734	0.007627	0.00949777	0.00935386	0.0125198	0.00892215	0.00964168	0.010649	0.0128076	0.00733919	0.0132393	0.0107929	0.0155418	0.0141027	0.0155418	0.016693	0.0215858	0.016693	0.027486	0.0234566	0.0269103	0.0270543	0.0408692	0.0368398	0.0526694	0.0538207	0.0733919
TCGA-YL-A8SP	0.0026536	0.00489896	0.00551133	0.00367422	0.00489896	0.0047969	0.00551133	0.00530721	0.00489896	0.00591958	0.00520514	0.00500102	0.00673607	0.0061237	0.00571545	0.0047969	0.00571545	0.00642988	0.00847112	0.00551133	0.0074505	0.00796081	0.00806287	0.00683813	0.0102062	0.00602164	0.00949173	0.00796081	0.0109206	0.00928761	0.011635	0.0117371	0.0147989	0.00969586	0.0156154	0.0136763	0.0186773	0.0194938	0.0237804	0.0206165	0.031537	0.0216371	0.0327618	0.0307206	0.0437844	0.0415391	0.0571545	0.0537865	0.0793019
TCGA-YL-A8SQ	0.00266819	0.00476463	0.0038117	0.00285878	0.00438346	0.00343053	0.0051458	0.00362112	0.00457404	0.00247761	0.00571755	0.00362112	0.00400229	0.0038117	0.00323995	0.00304936	0.00667048	0.00304936	0.00647989	0.0038117	0.00476463	0.00343053	0.00609872	0.00419287	0.00609872	0.00571755	0.00781399	0.00686106	0.00838574	0.00743282	0.00667048	0.00667048	0.00819516	0.00838574	0.0116257	0.010101	0.013341	0.010101	0.0169621	0.0146751	0.0163903	0.0186773	0.0240137	0.0232514	0.0377358	0.0392605	0.0529827	0.0596531	0.0909091
TCGA-YL-A8SR	0.00183299	0.00488798	0.00448065	0.00224033	0.00488798	0.00346232	0.00244399	0.00407332	0.00610998	0.00427699	0.00570265	0.00366599	0.00610998	0.00529532	0.00427699	0.00285132	0.00529532	0.00610998	0.00488798	0.00936864	0.00672098	0.00529532	0.00672098	0.00570265	0.00509165	0.00753564	0.00855397	0.00672098	0.00916497	0.00773931	0.00855397	0.00672098	0.0105906	0.010387	0.01222	0.0095723	0.010387	0.01222	0.014053	0.0148676	0.0156823	0.0175153	0.0217923	0.0207739	0.0293279	0.0301426	0.0492872	0.0484725	0.087169
TCGA-YL-A9WH	0.00242444	0.00339421	0.00323258	0.00355584	0.00420236	0.00404073	0.00323258	0.00420236	0.00290933	0.00226281	0.00517214	0.00501051	0.00517214	0.0027477	0.00436399	0.00468725	0.00501051	0.00307096	0.00581865	0.00468725	0.00339421	0.00355584	0.00549539	0.00517214	0.00533376	0.00323258	0.00630354	0.00646517	0.00695006	0.00678843	0.0105059	0.00565702	0.0111524	0.00678843	0.0108292	0.0105059	0.0134152	0.00856635	0.0148699	0.0145466	0.0185874	0.0181025	0.0239211	0.023113	0.0286084	0.0332956	0.0438015	0.0525295	0.0846937
TCGA-YL-A9WI	0.00140935	0.00326714	0.00326714	0.00198591	0.00329917	0.00281871	0.00294683	0.00227418	0.00256246	0.00275464	0.00403587	0.00288277	0.00317104	0.00288277	0.00256246	0.00323511	0.00352338	0.00301089	0.00432415	0.0037476	0.004164	0.00387572	0.00474055	0.00413197	0.00470852	0.00365151	0.00586163	0.00461243	0.00605381	0.00461243	0.00618193	0.00592569	0.0070788	0.00691864	0.00848815	0.0070788	0.0105381	0.00832799	0.0113709	0.00983344	0.0125881	0.0134849	0.018706	0.0162076	0.0241832	0.0246316	0.0347213	0.0369315	0.0584881
TCGA-YL-A9WJ	0.00193133	0.00300429	0.00107296	0.00128755	0.00257511	0.00236052	0.00214592	0.00193133	0.0027897	0.00107296	0.00214592	0.00214592	0.00257511	0.000858369	0.00236052	0.00300429	0.00386266	0.00236052	0.00171674	0.00364807	0.00407725	0.00343348	0.00429185	0.00386266	0.00386266	0.0027897	0.00493562	0.00386266	0.00450644	0.00450644	0.00536481	0.00622318	0.00665236	0.00751073	0.00536481	0.00622318	0.00729614	0.00793991	0.0126609	0.00858369	0.0133047	0.0128755	0.0180258	0.0227468	0.0296137	0.0300429	0.0495708	0.0603004	0.0984979
TCGA-YL-A9WK	0.00196394	0.00482057	0.00624888	0.00508838	0.00669523	0.00598107	0.00651669	0.00446349	0.00669523	0.00553473	0.00669523	0.00624888	0.00651669	0.00553473	0.00580254	0.00553473	0.00633815	0.00526692	0.0067845	0.00607034	0.00669523	0.00517765	0.00732012	0.00687377	0.00633815	0.00749866	0.0085699	0.00758793	0.0106231	0.00705231	0.00919479	0.00776647	0.00937333	0.00999821	0.0124085	0.0116943	0.0123192	0.0105338	0.0155329	0.0139261	0.0193715	0.0183003	0.0227638	0.0246385	0.0295483	0.0295483	0.0469559	0.0465096	0.0797179
TCGA-YL-A9WL	0.002032	0.00533401	0.00431801	0.00508001	0.00406401	0.00584201	0.00457201	0.00330201	0.00508001	0.00457201	0.00609601	0.00406401	0.00736601	0.00457201	0.00457201	0.00558801	0.00609601	0.00406401	0.00635001	0.00508001	0.00558801	0.00457201	0.00762002	0.00558801	0.00965202	0.00558801	0.00584201	0.00838202	0.00939802	0.00838202	0.00685801	0.00558801	0.012954	0.00787402	0.011684	0.01016	0.016764	0.012446	0.015748	0.01397	0.017272	0.013716	0.019812	0.018542	0.021336	0.02159	0.0365761	0.0358141	0.0685801
TCGA-YL-A9WX	0.0038036	0.00449516	0.0055325	0.00484094	0.00656985	0.00345781	0.00968188	0.00587828	0.00622407	0.00449516	0.00484094	0.00484094	0.00691563	0.00518672	0.00656985	0.0038036	0.00795297	0.00656985	0.00760719	0.00795297	0.00691563	0.00726141	0.00622407	0.0038036	0.00691563	0.00968188	0.00484094	0.0100277	0.00899032	0.0107192	0.00795297	0.00864454	0.011065	0.00899032	0.0134855	0.0124481	0.0131397	0.0134855	0.0152144	0.0217842	0.019018	0.0193638	0.0259336	0.0259336	0.0297372	0.0266252	0.04426	0.0373444	0.0653527
TCGA-YL-A9WY	0.00110654	0.00411002	0.00379387	0.0028454	0.0028454	0.00347771	0.00363579	0.00316156	0.00521657	0.00347771	0.00458426	0.00379387	0.0042681	0.00331963	0.00363579	0.00411002	0.00347771	0.00379387	0.00411002	0.00363579	0.00411002	0.00363579	0.00411002	0.00379387	0.00490041	0.00521657	0.00600696	0.00505849	0.00490041	0.00553272	0.00584888	0.00600696	0.00758773	0.00442618	0.0110654	0.00758773	0.0109074	0.00885236	0.0110654	0.0112235	0.014227	0.0147012	0.0213405	0.0164401	0.0254505	0.0292444	0.0393614	0.0490041	0.0834651
[truncated: 57 more columns]
