# Supplementary material for: Multimodal deep learning model for predicting homologous recombination deficiency in prostate cancer: an international multi-cohort study
Source: Research Square preprint supplement (doi:10.21203/rs.3.rs-6488233/v1), 2025-05-07
Supplement: Supplementary file 6 [file 95226eb0dc4ccd31d999614a.docx]

Supplementary Table 8: Predictive performance of deep learning models with Pathology features.

| Model | Cohort | AUC | 95% CI | Accuracy | Sensitivity | Specificity | PPV | NPV |
| --- | --- | --- | --- | --- | --- | --- | --- | --- |
| LR | Training | 0.582 | 0.503-0.662 | 0.657 | 0.500 | 0.693 | 0.273 | 0.858 |
|  | Test | 0.661 | 0.524-0.799 | 0.646 | 0.722 | 0.640 | 0.220 | 0.941 |
| NaiveBayes | Training | 0.587 | 0.508-0.666 | 0.631 | 0.569 | 0.667 | 0.270 | 0.867 |
|  | Test | 0.649 | 0.510-0.788 | 0.708 | 0.611 | 0.728 | 0.239 | 0.929 |
| SVM | Training | 0.607 | 0.531-0.683 | 0.673 | 0.528 | 0.708 | 0.292 | 0.867 |
|  | Test | 0.697 | 0.566-0.828 | 0.701 | 0.722 | 0.704 | 0.255 | 0.946 |
| KNN | Training | 0.933 | 0.907-0.959 | 0.761 | 0.958 | 0.716 | 0.437 | 0.987 |
|  | Test | 0.396 | 0.262-0.530 | 0.875 | 0.056 | 1.000 | 0.500 | 0.880 |
| RandomForest | Training | 1.000 | 1.000-1.000 | 0.995 | 1.000 | 0.994 | 0.973 | 1.000 |
|  | Test | 0.566 | 0.414-0.718 | 0.799 | 0.389 | 0.864 | 0.280 | 0.908 |
| ExtraTrees | Training | 1.000 | nan - nan | 1.000 | 1.000 | 1.000 | 1.000 | 1.000 |
|  | Test | 0.593 | 0.439-0.748 | 0.792 | 0.389 | 0.856 | 0.269 | 0.907 |
| XGBoost | Training | 1.000 | nan - nan | 1.000 | 1.000 | 1.000 | 1.000 | 1.000 |
|  | Test | 0.745 | 0.633-0.857 | 0.632 | 0.889 | 0.595 | 0.239 | 0.974 |
| LightGBM | Training | 0.992 | 0.985-0.999 | 0.956 | 0.958 | 0.955 | 0.831 | 0.990 |
|  | Test | 0.815 | 0.732-0.898 | 0.653 | 1.000 | 0.603 | 0.265 | 1.000 |
| GradientBoosting | Training | 0.930 | 0.897-0.962 | 0.842 | 0.889 | 0.831 | 0.547 | 0.970 |
|  | Test | 0.767 | 0.665-0.869 | 0.681 | 0.833 | 0.664 | 0.259 | 0.965 |
| MLP | Training | 0.574 | 0.496-0.652 | 0.738 | 0.347 | 0.827 | 0.316 | 0.846 |
|  | Test | 0.698 | 0.567-0.829 | 0.715 | 0.722 | 0.720 | 0.265 | 0.947 |

This table shows the performance of different machine learning models in Pathology features, including logistic regression (LR), naive bayes (NB), support vector machine (SVM), k-nearest neighbors (KNN), random forest (RF), extra trees, extreme gradient boosting (XGBoost), LightGBM, gradient boosting (GB), and multilayer perceptron (MLP). These models were trained and tested for a specific task. The metrics used for evaluation were accuracy, area under the curve (AUC), 95% confidence interval (CI), sensitivity, specificity, positive predictive value (PPV), negative predictive value (NPV), and the threshold that was set for each model.
