# Supplementary material for: Multimodal deep learning model for predicting homologous recombination deficiency in prostate cancer: an international multi-cohort study
Source: Research Square preprint supplement (doi:10.21203/rs.3.rs-6488233/v1), 2025-05-07
Supplement: Supplementary file 7 [file abb1315e5548b976233479fb.xlsx]

## Sheet: Sheet1
ID	wavelet_LHH_glcm_ClusterShade	wavelet_LLH_glszm_ZoneVariance	wavelet_LHL_glszm_LargeAreaHighGrayLevelEmphasis	original_shape_LeastAxisLength	wavelet_HHL_glszm_GrayLevelNonUniformityNormalized	wavelet_LHL_firstorder_Skewness	log_sigma_5_0_mm_3D_glszm_SmallAreaLowGrayLevelEmphasis	log_sigma_4_0_mm_3D_glcm_MaximumProbability	wavelet_HLL_firstorder_Median
DP712198-1.nii.gz	4.99314	3.825	11989.3	25.4193	0.0234724	-0.035266	0.00179236	0.00351902	-15.5965
DP712198-2.nii.gz	14.9694	60.1097	39482.5	22.267	0.0276195	-0.933883	0.00325806	0.0205589	0.0173647
DP715676-1.nii.gz	-4.48147	2.10385	14428.2	23.3459	0.0219361	0.4492	0.00165531	0.00301771	-19.0828
DP715676-2.nii.gz	-7.99838	6.8137	48487.1	31.1124	0.0173781	-0.602144	0.00141102	0.00696284	1.2538
N132039-1.nii.gz	89.2956	10.0136	80634.6	29.4947	0.056129	-1.69533	0.00180932	0.00476392	-12.2284
N132039-2.nii.gz	-6.00293	966.993	56212.7	22.3748	0.0521671	-0.467893	0.0110552	0.0386069	1.90053
N132151-1.nii.gz	1846.47	0.324872	26512.5	19.9521	0.0170454	-0.266871	0.00242822	0.00422285	-30.5808
N132151-2.nii.gz	34.8251	3.11721	8369.96	13.087	0.0322921	-0.210642	0.0143537	0.0183062	3.82446
N140033-1.nii.gz	66.3213	0.441671	51670.8	30.2204	0.0228776	-0.346283	0.000518319	0.00169856	-26.3132
N140033-2.nii.gz	6.93612	154.381	8916.47	21.6444	0.0394973	-0.431378	0.0189527	0.048748	1.27861
N140320-1.nii.gz	310.079	0.213956	18014.4	12.9958	0.017827	0.18796	0.003956	0.0125624	-42.875
N140320-2.nii.gz	-5.94334	1.27419	4008.55	9.66938	0.0448147	0.299819	0.0278594	0.0267404	7.0456
N140627-1.nii.gz	80.6804	0.508764	24171.7	20.3461	0.0142802	-0.108901	0.00151139	0.00366383	-32.4743
N140627-2.nii.gz	12.4789	109.189	14338.9	19.1245	0.0405026	-0.782216	0.00439628	0.0223047	-1.01439
N141022-1.nii.gz	0.68593	389.279	11921.8	27.2799	0.0650268	-0.366217	0.00591905	0.0457187	-2.55397
N141022-2.nii.gz	5.29846	46.9659	10855.6	33.8277	0.0399669	-0.138841	0.00612099	0.0444937	2.64037
N141189-1.nii.gz	-11.4106	0.459025	6330.52	14.2837	0.0204458	-0.169814	0.00617296	0.00839015	-13.5524
N141189-2.nii.gz	150.715	2.6358	4890.28	9.09209	0.0324715	-0.709727	0.0236775	0.0292648	-2.89966
N141421-1.nii.gz	558.155	0.0151479	6212.85	6.81652	0.0433058	-0.0863588	0.0220023	0.0291897	-99.7616
N141421-2.nii.gz	16.212	6.86981	1059.29	7.62684	0.0445274	0.1324	0.0382292	0.0848088	7.03508
N141783-1.nii.gz	10.7852	3.36288	3780.92	12.8528	0.0356653	0.386922	0.00437678	0.00619744	-29.1928
N141783-2.nii.gz	-4.43896	3.0816	1121.29	6.2819	0.0610352	-0.351275	0.0446588	0.0525645	-4.84841
N142161-1.nii.gz	242.641	0.597833	15117.5	17.8117	0.020706	0.213333	0.00244218	0.00545191	-5.5093
N142161-2.nii.gz	0.554365	210.924	13543.1	20.0673	0.0368762	0.31141	0.0031497	0.00961142	-5.62454
N142443-1.nii.gz	202.054	0.818969	6636.48	8.40342	0.0278005	-0.322185	0.00776557	0.00963874	-29.4191
N142443-2.nii.gz	71.7146	7.86381	3966.26	8.38767	0.0241881	-0.57391	0.0205314	0.02744	0.92936
N143205-1.nii.gz	-60.7835	0.52551	12272.6	8.48982	0.0333577	-1.12386	0.0144411	0.0139427	-45.4025
N143205-2.nii.gz	97.1207	6.30917	5093.25	10.3301	0.0339427	-0.421059	0.0395231	0.0229689	1.00438
N143265-1.nii.gz	54.2835	2.38391	12525.7	17.801	0.0429094	-0.0182377	0.000828852	0.00390669	-49.8133
N143265-2.nii.gz	8.94691	48.4312	14252.1	12.4194	0.0380609	-0.730745	0.00973761	0.0491133	-5.29351
N143530-1.nii.gz	-53.87	0.391094	4939.82	7.62699	0.0341696	-0.0536273	0.0216908	0.0190363	-33.8124
N143530-2.nii.gz	-23.3018	6.08107	3430.99	7.92904	0.0327084	0.995356	0.021914	0.0343027	6.73876
N150364-1.nii.gz	162.883	0.50426	32494	12.6277	0.0212466	-0.467681	0.00502167	0.00445256	-26.1714
N150364-2.nii.gz	2.79197	488.532	15335.8	13.45	0.0426974	-0.0465938	0.00511528	0.0178117	1.84407
N150627-1.nii.gz	135.305	0.493764	25838.3	23.1933	0.0183804	-0.0324662	0.00107748	0.00193721	-41.5508
N150627-2.nii.gz	-1.4933	345.666	45144.5	21.3832	0.0364866	-0.48978	0.00314582	0.0167626	2.01319
N150727-1.nii.gz	658.782	0.234127	20520.4	14.0705	0.0166942	-0.27922	0.00502936	0.00691124	-49.6809
N150727-2.nii.gz	58.0559	0.894807	49445.5	14.7247	0.0217136	-0.211035	0.00455896	0.00854253	-0.0188804
N151019-1.nii.gz	61.1864	0.291887	6048.05	9.49668	0.0258114	-0.0570026	0.00446167	0.00779244	-34.3271
N151019-2.nii.gz	0.27446	3.23792	3908.01	6.29047	0.0669919	-1.17025	0.0443019	0.0474787	-13.5605
N151022-1.nii.gz	27.5994	1.54034	8274.12	29.1572	0.0263556	-0.0950866	0.00198835	0.00394346	-26.2571
N151022-2.nii.gz	1.98622	49.5683	36874.1	21.2832	0.0294821	-0.644428	0.00158094	0.00777956	8.65116
N151249-1.nii.gz	-43.6475	1.00325	5502.15	17.8929	0.0289227	-0.135978	0.00306996	0.00795688	-4.16002
N151249-2.nii.gz	-2.34194	46.0891	23956.3	16.2916	0.035697	-0.612901	0.0124992	0.0145629	5.51263
N151307-1.nii.gz	-2.04937	1.15198	11477.4	25.0238	0.0220461	0.308856	0.000759528	0.0021326	-16.7274
N151307-2.nii.gz	-0.755307	159.885	10694.1	17.4887	0.0334587	-0.0694833	0.00489222	0.0144273	4.68804
N151400-1.nii.gz	6.70919	10.1061	23555	33.4404	0.041686	-0.245265	0.00103475	0.00187852	-16.5589
N151400-2.nii.gz	0.597084	447.881	28698.2	32.3523	0.0265256	-0.509197	0.00226778	0.00765498	2.09457
N151520-1.nii.gz	36.693	0.14232	12975.4	28.3913	0.0180401	-0.0924364	0.00626164	0.00902277	-66.5833
N151520-2.nii.gz	-17.8167	1.12314	1266.75	7.96871	0.0509886	0.369709	0.0567569	0.0562733	-0.942576
N151606-1.nii.gz	209.341	0.895449	29231.3	35.0228	0.0235136	-0.400904	0.000575048	0.00297628	-18.9767
N151606-2.nii.gz	3.05285	799.07	132960	36.4747	0.035294	-1.18349	0.00327729	0.0123266	3.23462
N151653-1.nii.gz	104.674	0.597223	25652.9	29.3835	0.0193102	-0.461682	0.000580628	0.002003	-38.1771
N151653-2.nii.gz	-0.258309	480.067	16963.6	31.9194	0.0340887	0.208571	0.00305055	0.013468	-0.774878
N151847-1.nii.gz	282.649	0.407631	56410.1	27.2127	0.0161497	-0.423124	0.00109272	0.00169965	-24.5922
N151847-2.nii.gz	-14.8988	177.492	14264	23.8955	0.0355601	0.0975821	0.00544538	0.00811679	4.02733
N151881-1.nii.gz	58.0066	0.904752	10515.8	19.858	0.0230359	0.147411	0.00193651	0.00413513	-34.4785
N151881-2.nii.gz	-13.3071	254.898	29450.4	23.8466	0.0334809	-0.500944	0.00360263	0.012765	1.11896
N152001-1.nii.gz	-0.483826	53.7871	14443.3	28.9227	0.0547859	0.00544902	0.00159115	0.00378153	-12.9209
N152001-2.nii.gz	0.453303	14.8848	11116	11.9067	0.0351192	-0.482978	0.00382671	0.0123944	2.98662
N152235-1.nii.gz	45.1728	0.37385	7151.47	8.20816	0.0308667	-0.185795	0.00766511	0.0115391	-56.8267
N152235-2.nii.gz	-6.86139	1.40972	654.647	6.64323	0.0688889	-0.227158	0.0280115	0.161899	18.0098
N152637-1.nii.gz	12.6612	1.78869	12944.7	25.0242	0.0258223	-0.146329	0.00154648	0.00471834	-10.1835
N152637-2.nii.gz	-0.0976651	29.7342	13873.2	17.6539	0.03659	-0.726975	0.00698208	0.0108032	2.31157
N152679-1.nii.gz	-30.7159	0.665597	10268.8	21.8327	0.0194203	0.0279938	0.00214707	0.00407028	-21.43
N152679-2.nii.gz	-0.368387	140.173	59317.6	23.1723	0.0310019	-0.0227107	0.00390552	0.0156351	2.46969
N152845-1.nii.gz	-25.1232	0.838581	28633.3	23.4153	0.0230442	-0.102935	0.00101775	0.00339679	-29.1684
N152845-2.nii.gz	-0.408905	119.319	56816.1	21.5353	0.0353668	-0.0877882	0.00259931	0.00733142	5.57573
N152949-1.nii.gz	142.386	0.30609	13385.5	23.1789	0.0220841	0.109645	0.0023274	0.00362	-48.2537
N152949-2.nii.gz	4.19946	10.4257	18739.1	13.3407	0.0371028	-0.671497	0.0093966	0.0179818	3.4274
N153026-1.nii.gz	-13.7476	0.489974	3098.48	11.8393	0.0260156	0.0461846	0.00270965	0.00867968	-81.8173
N153026-2.nii.gz	4.652	14.623	9616.07	10.4327	0.0321361	-0.144171	0.00609102	0.0130505	7.82069
N153475-1.nii.gz	1.02384	324.613	19717.7	31.2232	0.0891811	-0.40196	0.000636395	0.00325208	-13.2725
N153475-2.nii.gz	0.993205	13583.4	115641	35.5702	0.0386795	-0.600903	0.00441141	0.0178665	-0.296091
N153476-1.nii.gz	-412.241	0.3322	20496.4	21.9764	0.0115485	0.208038	0.00138079	0.00235072	-27.5187
N153476-2.nii.gz	19.1852	28.4251	24090.1	28.7852	0.030418	-0.638587	0.00195182	0.011262	2.71988
N153617-1.nii.gz	28.1472	0.535309	10222.1	22.1232	0.0234282	0.0132953	0.00280025	0.00431817	-26.5779
N153617-2.nii.gz	7.17098	93.9975	30758.8	21.6531	0.0335839	-0.916754	0.00456696	0.0119562	-0.759076
N153654-1.nii.gz	61.9492	0.330789	16947.2	14.9718	0.0116148	-0.281076	0.00578043	0.0054326	-29.799
N153654-2.nii.gz	8.02132	63.5177	12451.2	14.373	0.031524	-0.669314	0.00884964	0.0172057	-2.89926
N153673-1.nii.gz	7.66399	1.28911	4778.06	24.5878	0.0267599	0.210595	0.00282201	0.00431588	-22.3264
N153673-2.nii.gz	0.9453	366.85	30694.2	23.8989	0.0364628	0.802331	0.00288353	0.0136424	3.75827
N153700-1.nii.gz	5.12142	2.19109	12977.1	34.5079	0.0249475	-0.147719	0.000965524	0.00369026	-13.931
N153700-2.nii.gz	-1.60887	27.8563	10267.2	26.8401	0.0345822	-0.0695729	0.00351024	0.00712878	0.336085
N153842-1.nii.gz	110.823	0.47865	9310.65	14.0632	0.0251177	-0.256009	0.00363266	0.00635111	-29.8092
N153842-2.nii.gz	-0.955976	32.3864	10721.2	14.659	0.0307777	-0.305984	0.0130238	0.0203389	11.7488
N153899-1.nii.gz	138.087	0.282261	9082.96	10.1854	0.0266042	0.298291	0.00243055	0.00693507	-80.2044
N153899-2.nii.gz	-1.06506	94.4822	13383.6	15.184	0.035454	-0.68542	0.00724448	0.0177824	3.87098
N153976-1.nii.gz	-10.1696	0.397301	50564.9	20.4654	0.0202024	-0.746421	0.00232346	0.00361289	-28.8063
N153976-2.nii.gz	-18.4404	50.9103	31808.4	17.1379	0.032446	-0.443149	0.00423902	0.0140544	1.68355
N154076-1.nii.gz	128.606	1.01332	39584.9	25.5925	0.0181567	-0.495084	0.000584298	0.00232907	-20.9222
N154076-2.nii.gz	4.06592	62.8233	28749.7	21.0494	0.0355497	-0.910228	0.00458328	0.0089369	7.81243
N160069-1.nii.gz	-3.76092	1.70636	8696.24	15.9823	0.0271314	-0.412377	0.00161828	0.00517953	-11.1545
N160069-2.nii.gz	-19.279	6.29309	7428.96	14.789	0.0340388	-0.305838	0.00532141	0.00788271	2.579
N160205-1.nii.gz	-103.411	0.289156	22971.1	20.4775	0.0148374	-0.132428	0.00142415	0.00219438	-38.7825
N160205-2.nii.gz	-15.4994	560.842	12495.4	21.7047	0.0432051	-0.345751	0.0174508	0.0640328	-1.00615
N160302-1.nii.gz	-0.489899	1.08123	12994.5	19.745	0.0273058	-0.332356	0.00214187	0.00369545	-15.4273
N160302-2.nii.gz	-0.703285	471.806	19904	14.4593	0.0517987	-0.506396	0.00746751	0.0525815	1.94152
N160311-1.nii.gz	205.432	0.267776	14880.6	17.6083	0.0212005	-0.371782	0.00252929	0.00388883	-30.4572
N160311-2.nii.gz	5.59531	35.9792	26999	17.5398	0.0241393	0.0815171	0.00105814	0.00626515	5.31902
N160387-1.nii.gz	6.19595	0.673454	6011.26	15.7512	0.0258568	0.0234499	0.00259918	0.00543817	-23.1974
N160387-2.nii.gz	46.5897	22.3815	14326.2	12.215	0.0306272	-0.608841	0.00750995	0.0188553	9.04284
N160607-1.nii.gz	24.2512	0.560745	15522.4	21.7218	0.0258918	-0.0477485	0.00169632	0.00309044	-24.9722
N160607-2.nii.gz	0.386972	167.782	64507.7	26.5658	0.0341594	-1.12396	0.00259208	0.0103623	3.95342
N160709-1.nii.gz	27.2537	0.636934	6073.68	14.2147	0.0337615	-0.193548	0.00280339	0.00828675	-22.3403
N160709-2.nii.gz	-0.560085	814.51	7292.34	13.4134	0.0537471	-0.176245	0.0364683	0.0390968	1.28432
N160714-1.nii.gz	2.23567	1.12694	4993.32	15.8491	0.0277726	0.215474	0.0115913	0.0177235	-67.1586
N160714-2.nii.gz	-2.97423	7.04847	2933.19	9.70668	0.0234237	0.150121	0.00648153	0.0150347	9.23236
N160788-1.nii.gz	195.52	0.405221	9449.61	14.6486	0.0216343	0.081289	0.00352323	0.00511432	-19.9071
N160788-2.nii.gz	1.11909	30.04	745.438	8.96302	0.073724	-0.102165	0.00509962	0.0439436	0.386452
N161142-1.nii.gz	81.8906	0.277989	10318	13.2129	0.0275292	0.304459	0.00846935	0.0109243	-22.9464
N161142-2.nii.gz	17.1184	2.65959	7560.27	12.617	0.0237325	-0.507402	0.00803188	0.00969589	6.5971
N161144-1.nii.gz	30.082	1.99117	8360.23	28.7801	0.0258153	-0.0298762	0.00366301	0.00715273	-9.37182
N161144-2.nii.gz	19.08	11.8922	13958.5	18.1538	0.0214659	0.0465274	0.00205243	0.00680514	0.396486
N161393-1.nii.gz	-110.083	0.660657	9317.57	8.55507	0.0388677	-0.822671	0.00560437	0.00712269	-0.575017
N161393-2.nii.gz	-0.113942	666.045	10962	16.6404	0.0470166	-0.331745	0.0182303	0.0782928	3.25217
N161395-1.nii.gz	4.04644	2.19699	6596.6	21.5718	0.029509	-0.261924	0.00221412	0.00657408	-17.9469
N161395-2.nii.gz	3.11267	29.3502	9293.41	14.3576	0.0310699	-0.172311	0.00372003	0.0148547	1.38259
N161580-1.nii.gz	149.693	0.756144	28947.5	26.2924	0.0209055	-0.1988	0.00109493	0.00211174	-24.5587
N161580-2.nii.gz	21.1395	119.339	86429.3	27.3903	0.0304893	-1.61201	0.00419953	0.0147615	3.2996
N161583-1.nii.gz	81.8022	0.325545	13637.5	17.7938	0.0221341	-0.0780574	0.000644664	0.00363561	-40.0353
N161583-2.nii.gz	5.9805	168.715	9134.14	16.9093	0.0493525	0.324232	0.0138822	0.0246836	8.5897
N161662-1.nii.gz	-14.2913	0.972735	21407.2	20.8628	0.0256822	-0.0366274	0.00182077	0.0032361	-20.6104
N161662-2.nii.gz	-1.50862	138.902	1578.91	12.4446	0.0643739	0.156306	0.0465999	0.0453779	1.06888
N161701-1.nii.gz	-60.1504	0.418875	29438.7	16.0392	0.0232491	-0.577422	0.00246006	0.00283628	-32.9981
N161701-2.nii.gz	-0.634189	31.2121	12686.4	17.3854	0.0378562	-0.778907	0.00508457	0.00699264	3.71
N161730-1.nii.gz	-477.216	0.334383	25563.7	11.0548	0.0122695	-0.20221	0.00565571	0.0089936	-25.7155
N161730-2.nii.gz	-1.13794	33.8596	23303.1	14.1347	0.0450267	-1.04176	0.0046366	0.0133772	7.55049
N161784-1.nii.gz	19.6417	1.10252	9784.91	25.1324	0.0247218	0.216734	0.00253344	0.00277087	-18.5245
N161784-2.nii.gz	19.9036	329.866	283868	29.0819	0.0349707	-2.08051	0.00524962	0.017209	-1.15878
N161788-1.nii.gz	332.852	0.295517	24821.4	12.4253	0.0159412	-0.05849	0.00128585	0.0037349	-41.6943
N161788-2.nii.gz	-19.6013	29.4435	16164.4	21.8578	0.0308282	0.0165064	0.00347229	0.0082948	-0.29991
N161789-1.nii.gz	-34.4706	0.540173	19561.7	14.7781	0.0248278	-0.201204	0.00272224	0.00362526	-24.2939
N161789-2.nii.gz	-36.8646	10.3291	2282.38	9.10724	0.0330894	0.181079	0.00836992	0.0160184	2.38671
N161799-1.nii.gz	730.425	0.327776	49294.3	10.143	0.0266813	-0.723842	0.00414008	0.00559698	-11.156
N161799-2.nii.gz	3.17998	58.9169	11773.2	19.2635	0.0333599	0.428438	0.00474864	0.0109158	-0.650782
N161814-1.nii.gz	26.75	0.3361	8222.24	17.2542	0.0274012	0.155661	0.00229653	0.00351334	-51.3766
N161814-2.nii.gz	17.6853	63.8626	17186.2	21.7892	0.0372575	-0.152942	0.01328	0.0230222	-0.99011
N161875-1.nii.gz	1661.8	0.72604	47656.4	15.7859	0.0250995	-0.930233	0.00294414	0.00546201	-15.7686
N161875-2.nii.gz	-0.711055	121.338	10897.3	14.188	0.0354323	-0.459517	0.00612614	0.0213972	-4.23802
N161877-1.nii.gz	-8.45858	0.538576	5004.66	17.1997	0.0254191	0.204353	0.00453911	0.0057412	-16.0762
N161877-2.nii.gz	-1.76449	70.0714	32899.8	18.1613	0.0369898	-0.224988	0.00585636	0.0153213	4.86984
N161879-1.nii.gz	9.15037	2.01052	10074.3	20.5434	0.0341429	-0.190415	0.00215093	0.00426159	-6.04536
N161879-2.nii.gz	0.427537	1294.29	10526	20.8634	0.0537618	0.205486	0.0233893	0.0312679	2.4705
N161896-1.nii.gz	-23.3087	0.248945	19239.5	28.9136	0.0104428	0.00887468	0.00105212	0.00293478	-12.0281
N161896-2.nii.gz	22.9955	267.988	39427.5	37.1693	0.025297	0.0125139	0.00249829	0.0108579	-0.308884
N161934-1.nii.gz	-38.4514	0.43377	6891.53	13.5087	0.0222144	-0.106049	0.00261445	0.0060048	-10.7599
N161934-2.nii.gz	18.0368	6.96217	18242.5	14.5992	0.0287436	-0.97807	0.0071008	0.0108859	2.56641
N161937-1.nii.gz	-49.179	0.461529	8491.18	20.2789	0.018443	0.0414981	0.00133374	0.00384248	-30.2342
N161937-2.nii.gz	-0.381019	214.895	15044.9	20.9468	0.0376205	0.985063	0.00498716	0.0270648	0.139132
N161963-1.nii.gz	57.6896	0.0938921	5823.04	10.8732	0.0299408	0.256026	0.009572	0.0126928	-32.7555
N161963-2.nii.gz	4.62826	1.39197	4058.97	9.34139	0.0373264	-0.172283	0.0183576	0.0235324	19.0976
N161980-1.nii.gz	-380.774	0.0285467	737.556	0	0.148148	-0.180712	0.0413216	0.0470238	-11.6546
N161980-2.nii.gz	52.1901	1.28345	1052.63	5.88217	0.0447531	-0.330726	0.030038	0.139568	15.6505
N161997-1.nii.gz	55.495	0.729275	11364.7	15.0273	0.0237256	-0.294491	0.00191597	0.00400833	-19.7468
N161997-2.nii.gz	16.731	4.72741	11443.3	10.9537	0.0269745	-0.0402402	0.00235204	0.0116893	9.11289
N162059-1.nii.gz	122.267	0.469091	5991.98	8.50912	0.028595	0.426301	0.0136552	0.0124907	-55.7878
N162059-2.nii.gz	35.2564	0.452148	6762.91	7.14476	0.0270891	-0.10863	0.0290931	0.0315014	38.3985
N162113-1.nii.gz	-13.7624	1.1037	2927.93	10.6954	0.0280332	-0.145359	0.00651627	0.0145446	-35.7186
N162113-2.nii.gz	2.68008	3.16313	3277.99	8.68811	0.0412764	-0.0326966	0.0254871	0.0662327	5.85337
N162170-1.nii.gz	29.878	0.573731	2901.57	8.63332	0.0330056	0.00590804	0.00290897	0.0111818	-10.3894
N162170-2.nii.gz	-70.2011	2.74669	15744.2	9.10258	0.0303288	-1.06132	0.016054	0.0177973	13.0635
N162237-1.nii.gz	75.0645	1.06512	17259.7	31.3949	0.0264067	-0.431634	0.000495579	0.00322338	-21.9654
N162237-2.nii.gz	-3.70566	79.8852	20605.7	25.6481	0.0304989	0.0102663	0.00445209	0.00829811	3.88702
N162254-1.nii.gz	-0.902659	130.859	9081.13	18.3105	0.0788537	-0.117009	0.00283891	0.00443198	-8.33287
N162254-2.nii.gz	22.3674	48.392	9193.57	14.2884	0.0456848	-0.336889	0.0330887	0.0460884	3.15781
N162263-1.nii.gz	79.9597	0.457977	29154	20.3891	0.0163949	0.00161467	0.00122118	0.00184114	-30.6639
N162263-2.nii.gz	-2.36122	227.573	39347.5	16.8472	0.0360675	-0.356286	0.00418206	0.014562	0.25629
N162281-1.nii.gz	21.3397	1.12115	6201.33	19.3345	0.0222595	0.209453	0.0027619	0.00407164	-33.6217
N162281-2.nii.gz	-61.5562	124.507	23455.3	21.4081	0.0363678	0.48001	0.00336166	0.00885253	3.25714
N162365-1.nii.gz	21.2859	2.42433	19941.9	27.3536	0.0239708	-0.49384	0.00112917	0.00617114	-9.40613
N162365-2.nii.gz	-19.9934	14.3678	35608	18.0638	0.0261673	-0.484804	0.00305531	0.0056503	7.21098
N162430-1.nii.gz	1.52878	0.793034	7267.98	19.877	0.0241235	0.189415	0.0030958	0.00410349	-23.1689
N162430-2.nii.gz	0.749523	180.662	16458.9	18.8567	0.0641332	-0.621264	0.00996378	0.0267456	-0.167746
N162546-1.nii.gz	2.81347	22.1001	8726.15	27.746	0.0491232	-0.300322	0.00173695	0.0108895	-3.30234
N162546-2.nii.gz	26.7544	21.4553	20510.8	24.4189	0.0251584	-0.339545	0.0011415	0.00590764	9.15061
N162559-1.nii.gz	24.0095	0.807729	12297.4	16.7671	0.0202172	0.373251	0.00249464	0.00334015	-23.9455
N162559-2.nii.gz	32.463	24.9814	7202.38	13.6286	0.034479	0.237199	0.0020515	0.0133989	3.64852
N162579-1.nii.gz	177.026	4.55175	38216.3	24.5419	0.0291955	-0.720974	0.00220398	0.00790657	-7.50148
N162579-2.nii.gz	-7.09	239.981	62434	24.5619	0.0384517	-0.849556	0.00376485	0.0217492	6.02857
N162735-1.nii.gz	32.6111	0.958904	9500.21	15.2319	0.0320546	-0.861359	0.00323182	0.0059119	-22.2958
N162735-2.nii.gz	10.4771	23.5511	4091.35	11.5449	0.0369516	0.035889	0.0202886	0.024937	16.7695
N162774-1.nii.gz	55.3748	0.377228	25632.9	22.7144	0.0169156	-0.15343	0.00148836	0.0025238	-16.9644
N162774-2.nii.gz	-52.5997	37.7839	10838.6	22.1709	0.0252051	0.4117	0.0052571	0.01206	2.28551
N162804-1.nii.gz	188.61	0.349686	21774.8	18.6495	0.0204338	-0.338228	0.00298758	0.00336862	-19.3925
N162804-2.nii.gz	-1.34303	68.7177	10131	12.5232	0.0414633	-0.362507	0.0151833	0.0248539	0.891424
N162827-1.nii.gz	7.91619	1.16935	12893.1	26.8072	0.0217142	-0.193092	0.00156994	0.00263014	-11.3769
N162827-2.nii.gz	-7.2699	6.27105	34377.8	19.8619	0.030108	-0.789043	0.00349984	0.0102881	4.82746
N162859-1.nii.gz	-0.850789	3.16377	7533.87	27.6344	0.0235425	-0.0948572	0.00148198	0.00700021	-4.54007
N162859-2.nii.gz	37.9179	7.38177	20893.6	21.7123	0.0232932	-0.232838	0.00112789	0.00488433	9.34948
N162873-1.nii.gz	71.809	0.703365	15288.1	14.7487	0.0212577	-0.498816	0.00464427	0.0049868	12.296
N162873-2.nii.gz	-79.2968	17.571	7242.54	16.0103	0.0345562	0.800463	0.0141337	0.0230752	1.08955
N162946-1.nii.gz	255.582	0.295428	11022.6	13.3983	0.0236859	-0.394893	0.00143323	0.00492977	-17.7768
N162946-2.nii.gz	5.52241	11.0971	2024.6	13.9315	0.0295884	0.212977	0.019404	0.0281606	-1.63231
N162977-1.nii.gz	400.09	0.491674	9573.52	8.58239	0.0268347	-0.472327	0.00264725	0.00836652	-27.8626
N162977-2.nii.gz	80.8535	2.08002	18384	21.8854	0.0203299	-0.151518	0.00826098	0.0115228	0.713015
N163034-1.nii.gz	167.154	0.292647	16661.3	22.8629	0.0201054	-0.214667	0.00156442	0.00313708	-20.3044
N163034-2.nii.gz	3.96614	140.244	17410.1	24.0315	0.0382924	-0.263697	0.00255369	0.00778333	4.23908
N163035-1.nii.gz	85.7693	0.869468	25508.3	29.5261	0.0193894	-0.367148	0.00114677	0.00205013	-17.3971
N163035-2.nii.gz	-0.615257	277.517	56818.4	25.6596	0.0345007	-0.996156	0.00218884	0.0163305	3.21155
N163076-1.nii.gz	11.632	59.7132	19068.2	24.1079	0.024279	-0.358802	0.0020808	0.0036999	-8.18231
N163121-1.nii.gz	-0.625725	4.39925	12047.9	38.0793	0.027114	-0.14756	0.00101295	0.00594731	-7.40365
N163121-2.nii.gz	7.95578	220.211	31284.9	36.9696	0.0276843	-0.0458221	0.00148791	0.0065939	2.33207
N163157-1.nii.gz	0.813578	127.404	4953.83	17.6391	0.0860404	-0.0935709	0.00815636	0.00945804	-7.60949
N163157-2.nii.gz	-7.36271	215.7	2512.57	16.6171	0.0481503	2.7484	0.0180513	0.0179052	4.59984
N163353-1.nii.gz	-4.23107	0.6775	23001.7	14.2768	0.0242584	0.253509	0.00435397	0.00479856	-29.3423
N163353-2.nii.gz	3.31085	14.7359	5629.17	12.8473	0.0344671	-0.499178	0.00563365	0.0210104	-1.47225
N163486-1.nii.gz	-9.25391	1.04609	6605.67	22.7974	0.0256787	-0.256479	0.00430774	0.00616843	-9.05081
N163486-2.nii.gz	9.26151	22.2644	20444.9	19.9134	0.0284765	-0.824947	0.00365117	0.00798535	5.96684
N170018-1.nii.gz	29.6468	0.761558	14539.7	41.5912	0.0210347	0.0104072	0.000458075	0.00188244	-16.0299
N170018-2.nii.gz	-2.99996	2004.2	165834	42.935	0.0362923	-0.42262	0.000943122	0.0130528	0.642877
N170860-1.nii.gz	-1.65787	2.44166	6102.08	17.7169	0.0306923	-0.387654	0.00756714	0.0104044	-14.6788
N170860-2.nii.gz	0.385252	384.856	7609.47	19.4878	0.037661	-0.114421	0.00659967	0.0365252	0.240656
N170874-1.nii.gz	208.904	0.39282	36391	24.4933	0.0186671	-0.479714	0.00104084	0.0019812	-32.1673
N170874-2.nii.gz	-2.55851	641.682	51834.6	27.5987	0.0429158	0.0261926	0.00241134	0.0159483	1.61754
N170893-1.nii.gz	13.6589	1.51111	21918.1	34.686	0.0225312	-0.185428	0.00113918	0.00304575	-9.1774
N170893-2.nii.gz	7.85105	75.1	22886.1	32.9217	0.0269741	-0.192372	0.00197664	0.00574803	2.17253
TCGA-EJ-5542-1.nii.gz	749.059	5.96765	137387	34.1776	0.0195666	-0.677935	0.000836587	0.0117198	-5.44874
TCGA-EJ-5542-2.nii.gz	10.457	588.568	78748.2	29.8033	0.0384256	-0.966821	0.00451782	0.0692299	0.793077
TCGA-J4-8198-2.nii.gz	-3.54069	216.318	213030	21.5552	0.050425	-0.445617	0.00336517	0.0347421	0.320385
TCGA-J4-A67M-1.nii.gz	510.59	4.86466	135481	25.2849	0.0140451	-0.249679	0.000386178	0.00289068	-18.3579
TCGA-J4-A67M-2.nii.gz	-13.6094	985.093	195639	24.8259	0.0288403	-2.04552	0.00485519	0.0255229	0.0377979
TCGA-J4-A67O-1.nii.gz	577.266	11.4192	289632	32.0035	0.0159096	-1.69334	0.000929848	0.00544334	-6.53774
TCGA-J4-A67O-2.nii.gz	10.9443	75.1027	24440.5	22.3342	0.0390195	-0.556091	0.00309732	0.0157701	1.16786
TCGA-J4-A67S-1.nii.gz	232.488	31.8952	58419.9	30.3608	0.0164227	-0.574646	0.00117433	0.00958973	-9.62118
TCGA-J4-A67S-2.nii.gz	0.0599706	361.644	197657	28.5481	0.0401411	-0.169682	0.00331554	0.0413458	2.19011
TCGA-J4-A6G1-1.nii.gz	305.455	4.41493	29375.7	26.3206	0.0158696	-0.0729972	0.000260663	0.00278644	-22.7196
TCGA-J4-A6G1-2.nii.gz	0.155183	638.49	201491	23.8128	0.0485528	-0.296132	0.0164539	0.049772	1.36012
TCGA-J4-A6G3-1.nii.gz	39.1686	3.74691	54597.8	32.1218	0.0159167	-0.624121	0.000969837	0.00506035	-10.8723
TCGA-J4-A6G3-2.nii.gz	1.84713	1020.99	794121	30.6025	0.0551605	-1.3919	0.00823569	0.0638927	1.60074
TCGA-J4-AATZ-1.nii.gz	97.5852	17.0617	91047.3	37.5146	0.0176294	-1.11794	0.000937311	0.0144824	-4.41818
TCGA-J4-AATZ-2.nii.gz	6.21799	977.289	212422	33.5765	0.0436451	-1.32179	0.00415681	0.029343	1.59867
ZD3251212-1.nii.gz	-0.799633	367.963	62179.1	24.1196	0.100204	2.96851	0.00223931	0.0165437	0.92155
ZD3251212-2.nii.gz	0.66827	511.585	15255	18.1099	0.0531096	1.55736	0.00747199	0.0225965	1.76691
