# Supplementary material for: Multimodal deep learning model for predicting homologous recombination deficiency in prostate cancer: an international multi-cohort study
Source: Research Square preprint supplement (doi:10.21203/rs.3.rs-6488233/v1), 2025-05-07
Supplement: Supplementary file 8 [file dcb93914c85a24a2d28a9821.docx]

Supplementary Table 5: Predictive performance of the ResNet50 model in distinguish tumor region and non-tumor region.

| **Cohort** | **ACC** | **AUC** | **95% CI** | **Sensitivity** | **Specificity** | **PPV** | **NPV** | **Precision** | **Recall** | **F1** |
| --- | --- | --- | --- | --- | --- | --- | --- | --- | --- | --- |
| Training | 0.920 | 0.960 | 0.969-0.969 | 0.842 | 0.950 | 0.866 | 0.939 | 0.866 | 0.842 | 0.854 |
| test | 0.927 | 0.936 | 0.935-0.936 | 0.434 | 0.987 | 0.800 | 0.935 | 0.800 | 0.434 | 0.563 |

This table illustrates the predictive performance of ResNet50 in differentiating between tumor and non-tumor regions based on pathological features. The metrics used for evaluation were accuracy, area under the curve (AUC), 95% confidence interval (CI), sensitivity, specificity, positive predictive value (PPV), negative predictive value (NPV), precision, recall, F1 score, and the threshold that was set for each model.
