# Supplementary material for: Multimodal deep learning model for predicting homologous recombination deficiency in prostate cancer: an international multi-cohort study
Source: Research Square preprint supplement (doi:10.21203/rs.3.rs-6488233/v1), 2025-05-07
Supplement: Supplementary file 9 [file ff250754def68ddfd9dc3419.xlsx]

## Sheet: Supplementary Table S5
ID	prob-0.52	prob-0.56	prob-0.57	prob-0.58	prob-0.59	prob-0.6	prob-0.62	prob-0.64	prob-0.65	prob-0.66	prob-0.68	prob-0.7	prob-0.72	prob-0.73	prob-0.74	prob-0.75	prob-0.77	prob-0.78	prob-0.81	prob-0.82	prob-0.84	prob-0.85	prob-0.86	prob-0.87	prob-0.88	prob-0.89	prob-0.91	prob-0.93	prob-0.94	prob-0.95	prob-0.97	prob-0.98	prob-0.99	prob05	prob051	prob053	prob054	prob067	prob079	prob099	prob10	pred1
DP712198	0.00680735	0.00816882	0.00816882	0.010211	0.0115725	0.012934	0.012934	0.0149762	0.010211	0.0149762	0.0190606	0.0136147	0.0149762	0.012934	0.0142954	0.0122532	0.0149762	0.0204221	0.0108918	0.0238257	0.0204221	0.0163376	0.023145	0.0197413	0.0265487	0.0224643	0.0313138	0.0422056	0.0428863	0.0415248	0.0299523	0.0285909	0.0496937	0.0302275	0.0338698	0.0719732	0.101245	0.0507135	0.120593	0.301931	0.3557	0.861982
DP715676	0.00703125	0.015625	0.0117188	0.0125	0.00703125	0.0148437	0.0109375	0.0179687	0.00625	0.009375	0.0140625	0.0125	0.0109375	0.00859375	0.0101563	0.0140625	0.0101563	0.0109375	0.0148437	0.0171875	0.021875	0.0101563	0.0164063	0.0132812	0.0234375	0.0203125	0.0179687	0.0210938	0.0296875	0.0265625	0.0460938	0.053125	0.1	0.0321682	0.0551929	0.0551929	0.0707078	0.0314822	0.0348497	0.492978	0.58156	0.568418
N1300136	0.00102041	0.00119048	0.00102041	0.00170068	0.00187075	0.00136054	0.00238095	0.00204082	0.00187075	0.00238095	0.00187075	0.0037415	0.00102041	0.00170068	0.00187075	0.00119048	0.00187075	0.00357143	0.00204082	0.00340136	0.00408163	0.0042517	0.0047619	0.00408163	0.00714286	0.00442177	0.00680272	0.0103741	0.012415	0.0130952	0.020068	0.0384354	0.055102	0.00123973	0.00170166	0.00218785	0.0031489	0.00169861	0.0045366	0.0769455	0.993879	0.0503113
N130360	0.00144479	0.00199518	0.00227038	0.00151359	0.00178879	0.00199518	0.00171999	0.00213278	0.00116959	0.00247678	0.00288958	0.00206398	0.00254558	0.00185759	0.00337117	0.00233918	0.00282078	0.00316477	0.00337117	0.00385277	0.00515996	0.00515996	0.00639835	0.00481596	0.00970072	0.00736154	0.00935673	0.0118335	0.0147231	0.0153423	0.0235982	0.0441004	0.0797386	0.00155251	0.00282683	0.00239193	0.00357503	0.0026047	0.00363084	0.123104	0.986956	0.044138
N131248	0.00213191	0.00106596	0.00133245	0.00159893	0.0011992	0.00173218	0.00159893	0.00133245	0.00133245	0.00226516	0.00173218	0.00199867	0.00133245	0.00133245	0.00226516	0.00173218	0.00226516	0.00426382	0.00226516	0.00493005	0.00639574	0.00333111	0.00746169	0.00679547	0.0083944	0.00786143	0.0115923	0.0107928	0.0210526	0.0186542	0.0334444	0.0494337	0.0623584	0.00130027	0.00169977	0.00254966	0.000846838	0.00106045	0.00521726	0.0971425	0.987823	0.118801
N131723	0.0047619	0.00350877	0.00488722	0.00526316	0.00526316	0.0056391	0.00488722	0.00451128	0.00501253	0.00413534	0.00614035	0.00551378	0.00501253	0.00413534	0.0056391	0.00513784	0.00513784	0.00451128	0.00413534	0.00463659	0.00701754	0.00363409	0.00701754	0.00488722	0.00601504	0.0066416	0.00614035	0.00639098	0.00839599	0.00802005	0.0139098	0.0224311	0.0313283	0.00499393	0.0058378	0.00546117	0.00938205	0.00639126	0.00924825	0.0459929	0.996574	0.139123
N131966	0.00241109	0.00256178	0.0021097	0.00316456	0.0022604	0.00271248	0.00301386	0.00195901	0.00286317	0.00331525	0.00482218	0.00256178	0.00241109	0.0045208	0.0022604	0.00316456	0.00316456	0.0045208	0.00346594	0.00527426	0.00617842	0.00542495	0.00632911	0.00617842	0.00858951	0.00753466	0.00843882	0.0123568	0.0195901	0.0189873	0.035865	0.0669078	0.0807715	0.00162254	0.00477239	0.0015908	0.00343437	0.00396985	0.0054687	0.138832	0.977525	0.0182569
N132039	0.000818713	0.00105263	0.00128655	0.00152047	0.00128655	0.00116959	0.00105263	0.00222222	0.000584795	0.00128655	0.00128655	0.00175439	0.00140351	0.0019883	0.00152047	0.00222222	0.00152047	0.0019883	0.00222222	0.00233918	0.00327485	0.00362573	0.00327485	0.00339181	0.00491228	0.00432749	0.00783626	0.00912281	0.0145029	0.0161404	0.0259649	0.0494737	0.0535673	0.00102408	0.00100404	0.00184075	0.000666962	0.00133632	0.0026298	0.0748738	0.992649	0.015317
N132136	0.0015873	0.00124717	0.000793651	0.000793651	0.00113379	0.0015873	0.000566893	0.00102041	0.0015873	0.0021542	0.0021542	0.00238095	0.00170068	0.00192744	0.00306122	0.00192744	0.00226757	0.00351474	0.00226757	0.00385488	0.00419501	0.00362812	0.00464853	0.00328798	0.00578231	0.00612245	0.00578231	0.00997732	0.010771	0.0108844	0.0190476	0.0344671	0.047619	0.0011177	0.00203512	0.00156548	0.00124789	0.00156267	0.0019989	0.064233	0.995459	0.00684915
N132151	0.000981932	0.00157109	0.00183294	0.00144017	0.00130924	0.00196386	0.00150563	0.00235664	0.00170202	0.00183294	0.00216025	0.00320765	0.00248756	0.00229118	0.00307672	0.00222571	0.00274941	0.00366588	0.00425504	0.00458235	0.00608798	0.00490966	0.00667714	0.00549882	0.00706991	0.00733176	0.00798638	0.0112595	0.0200969	0.0178057	0.0318146	0.0607489	0.114231	0.00174232	0.00227764	0.00284705	0.00329073	0.00329665	0.00604018	0.194139	0.970361	0.107534
N132598	0.00197368	0.00234962	0.00197368	0.00300752	0.00263158	0.00225564	0.00328947	0.00319549	0.0018797	0.00319549	0.00319549	0.00338346	0.00338346	0.00319549	0.00366541	0.0037594	0.00432331	0.0049812	0.00582707	0.00770677	0.00855263	0.00695489	0.00864662	0.0093985	0.012688	0.0102444	0.0137218	0.0190789	0.0278195	0.0229323	0.0420113	0.0720865	0.087782	0.00160297	0.00412547	0.00412547	0.00332769	0.00549075	0.0098407	0.179252	0.957865	0.022776
N132761	0.00451128	0.00364068	0.00474871	0.00387812	0.00324495	0.00514444	0.00411555	0.004907	0.00451128	0.00585675	0.00506529	0.00601504	0.00474871	0.00498615	0.00443213	0.00498615	0.00403641	0.00617333	0.00759794	0.00720222	0.00720222	0.00593589	0.00918085	0.0082311	0.0102097	0.00759794	0.0091017	0.0111595	0.015275	0.0136921	0.0235853	0.0395726	0.0891175	0.0046195	0.00715892	0.00715892	0.00655094	0.00889613	0.00817953	0.160714	0.979268	0.0569642
N140320	0.00188964	0.000755858	0.00151172	0.000755858	0.0026455	0.00151172	0.0026455	0.00188964	0	0.00226757	0.00340136	0.00340136	0.00566893	0.0026455	0.00529101	0.00755858	0.00718065	0.00793651	0.00566893	0.0128496	0.0109599	0.0113379	0.0124717	0.0185185	0.0196523	0.0173847	0.0279667	0.037037	0.0411943	0.0309902	0.0461073	0.0597128	0.0695389	0	0.0019405	0.000970248	0.00483385	0.0106536	0.0123888	0.174407	0.930802	0.00531907
N140460	0.000304445	0.000558149	0.000558149	0.000558149	0.000710371	0.000456667	0.000964076	0.000862594	0.000405927	0.000862594	0.0011163	0.00121778	0.000710371	0.00106556	0.00147148	0.000964076	0.00131926	0.00177593	0.00152222	0.00167445	0.00268926	0.00268926	0.00380556	0.00324741	0.00563223	0.00492186	0.00756038	0.0117719	0.0179115	0.0183682	0.0363304	0.0721534	0.131977	0.000510378	0.000583791	0.000583791	0.000332399	0.000749241	0.00253935	0.211915	0.9658	0.0345201
N140626	0.00472411	0.00547997	0.00604686	0.00604686	0.0058579	0.00566893	0.00642479	0.00623583	0.00302343	0.00566893	0.00642479	0.00661376	0.00623583	0.00472411	0.0058579	0.00680272	0.00623583	0.00529101	0.00604686	0.00963719	0.00812547	0.00793651	0.010393	0.00888133	0.00755858	0.0102041	0.00547997	0.0111489	0.016062	0.0128496	0.0156841	0.0275888	0.0291005	0.00592291	0.00709747	0.00742009	0.00835785	0.00611864	0.0117242	0.0485361	0.993414	0.105366
N140627	0.00315315	0.00292793	0.00405405	0.00157658	0.00247748	0.00315315	0.00315315	0.00337838	0.0027027	0.00382883	0.00225225	0.00247748	0.00405405	0.00337838	0.00540541	0.0027027	0.00585586	0.00540541	0.00630631	0.00765766	0.00833333	0.00810811	0.0148649	0.0105856	0.00968468	0.0123874	0.0157658	0.0245495	0.0315315	0.0259009	0.0506757	0.065991	0.0644144	0.00299979	0.00392146	0.00490182	0.00732638	0.00636094	0.00818481	0.136958	0.959183	0.0320616
N140768	0.00300752	0.00242915	0.00138809	0.00323887	0.00150376	0.00242915	0.0021978	0.00196645	0.00161943	0.0021978	0.00161943	0.00161943	0.00323887	0.0021978	0.00300752	0.0026605	0.00208213	0.0026605	0.00242915	0.00323887	0.00393291	0.0026605	0.00370156	0.00427993	0.00543667	0.00347021	0.0048583	0.00555234	0.00960093	0.00855986	0.0149219	0.027299	0.0384037	0.00204901	0.00278158	0.00200892	0.00277161	0.00293085	0.00318743	0.0501211	0.997288	0.0526546
N140833	0.00404313	0.00592992	0.00485175	0.00377358	0.00269542	0.00619946	0.00458221	0.00485175	0.00350404	0.00269542	0.00377358	0.00566038	0.00539084	0.00566038	0.00862534	0.00458221	0.00592992	0.00700809	0.00619946	0.00431267	0.00889488	0.00727763	0.00619946	0.00754717	0.0115903	0.0097035	0.00808625	0.0083558	0.0126685	0.00727763	0.0167116	0.0296496	0.0450135	0.00408837	0.00578988	0.00578988	0.00443779	0.00622407	0.00918645	0.0726618	0.992899	0.128307
N141003	0.00149604	0.00159804	0.00137704	0.00139404	0.00129203	0.00197205	0.00198905	0.00151304	0.00144504	0.00192105	0.00207405	0.00195505	0.00263507	0.00205705	0.00231206	0.00212506	0.00222706	0.00277107	0.00246506	0.00306008	0.00409711	0.0037401	0.00535514	0.00443712	0.00572915	0.00533814	0.00669817	0.00946925	0.0143994	0.0138214	0.0269627	0.0516643	0.107987	0.00150653	0.00217529	0.00177246	0.00208722	0.00238585	0.00393026	0.16665	0.980094	0.0162729
N141022	0.00185766	0.00189557	0.00157964	0.00179447	0.001567	0.00241369	0.00237578	0.00246424	0.00205985	0.00275489	0.00318455	0.00317192	0.00398069	0.00332356	0.00387959	0.00387959	0.0040186	0.00506748	0.00587626	0.0064702	0.00780974	0.00695041	0.00875752	0.00811303	0.0103624	0.00985695	0.0109817	0.0124096	0.0172497	0.0168074	0.0235682	0.0403882	0.0601274	0.00115128	0.00221571	0.00223661	0.00256184	0.00344279	0.00730902	0.0971616	0.988871	0.0117621
N141037	0.00221056	0.00200332	0.00165792	0.00165792	0.00193424	0.0020724	0.00186516	0.00200332	0.00200332	0.00297043	0.00338491	0.00324675	0.00269411	0.00248687	0.00373031	0.0020724	0.00269411	0.00317767	0.00248687	0.00442111	0.00373031	0.00469743	0.00476651	0.00462835	0.00898038	0.00545731	0.00594087	0.0109837	0.0150594	0.0146449	0.0281846	0.0491158	0.10438	0.00263514	0.0022466	0.0022466	0.00279818	0.00269108	0.00419257	0.165814	0.979853	0.0905087
N141090	0.00167461	0.00251192	0.00167461	0.00206106	0.00186783	0.00225428	0.00231869	0.00212547	0.00180343	0.00199665	0.00302718	0.00302718	0.00354244	0.00283396	0.003156	0.00251192	0.00360685	0.00412212	0.00521706	0.0063764	0.0063764	0.00611877	0.00817983	0.0087595	0.0104341	0.00863068	0.0123664	0.0146206	0.0197089	0.0184851	0.028404	0.0570012	0.106273	0.00131527	0.00339969	0.00222738	0.00327069	0.00269146	0.00909641	0.188968	0.970607	0.0115309
N141188	0.000623701	0.000970201	0.000831601	0.000831601	0.000762301	0.0004851	0.000693001	0.000900901	0.000970201	0.000554401	0.0010395	0.0015246	0.0011088	0.000831601	0.0019404	0.000970201	0.0015939	0.0022176	0.0012474	0.0018018	0.0031185	0.0024255	0.0038808	0.0033957	0.0042273	0.0035343	0.00540541	0.00845461	0.0160776	0.0161469	0.0309078	0.0569647	0.10097	0.000744341	0.000834031	0.000938285	0.00114268	0.0012488	0.00276476	0.148393	0.982635	0.0307733
N141647	0.00289892	0.00320141	0.00279808	0.00282329	0.00204185	0.00368036	0.00312579	0.00378119	0.00307537	0.00398286	0.00431056	0.0047391	0.00458785	0.00332745	0.00426015	0.00390723	0.00466347	0.0060247	0.00594908	0.00806655	0.00869675	0.00778926	0.00988152	0.0102596	0.0127552	0.0118477	0.0132342	0.0168137	0.0228888	0.0233678	0.0334006	0.0601966	0.108999	0.00348659	0.00470026	0.00491391	0.00638647	0.00586479	0.0111743	0.225625	0.953847	0.0425097
N141782	7.9233e-05	0.000396165	7.9233e-05	0.000158466	7.9233e-05	0.000237699	0.000475398	0.000396165	0.000396165	0.000475398	0.000554631	0.000871563	0.000316932	0.000475398	0.000633864	0.000633864	0.000633864	0.00110926	0.000950796	0.00190159	0.00126773	0.00182236	0.00245622	0.00316932	0.00499168	0.00419935	0.00594248	0.0107757	0.0171936	0.0175105	0.0415973	0.0785199	0.135568	0.000262652	0.000643784	0.000643784	0.00051318	0.000514103	0.00126465	0.21522	0.963522	0.00166666
N141783	0.00155502	0.000956938	0.00107656	0.00119617	0.00119617	0.00155502	0.00203349	0.00167464	0.00215311	0.00263158	0.00203349	0.00191388	0.00203349	0.00215311	0.00263158	0.00203349	0.00179426	0.00334928	0.00311005	0.00406699	0.00394737	0.0041866	0.00526316	0.00550239	0.00825359	0.00586124	0.0101675	0.0106459	0.0165072	0.0171053	0.0287081	0.0440191	0.0710526	0.00113034	0.00166233	0.00147763	0.00184042	0.00276559	0.00580534	0.107183	0.988825	0.0151774
N141899	0.000160875	0.00032175	0.000160875	0	0.000482625	0.000482625	0.00032175	0.000804376	0.00032175	0.000160875	0.000482625	0.000643501	0.000804376	0.00032175	0.00032175	0.000804376	0	0.000160875	0.000965251	0.00144788	0.002574	0.002574	0.00289575	0.00273488	0.00353925	0.00241313	0.00675676	0.0104569	0.0131918	0.0178571	0.036036	0.0677284	0.0823681	0	0.000235861	0.000471723	0.000470032	0.000706315	0.00208498	0.117975	0.985275	0.00128866
N141935	0.000453515	0.00113379	0.000226757	0.000680272	0.00113379	0.000680272	0.000453515	0.000907029	0.000453515	0.00136054	0.000680272	0.000680272	0.000680272	0.00136054	0.00113379	0.00113379	0.000907029	0.00226757	0.000907029	0.00136054	0.00249433	0.00362812	0.00181406	0.00226757	0.00430839	0.0047619	0.00566893	0.00657596	0.0122449	0.014059	0.024263	0.0653061	0.108163	0.000685054	0.00067165	0.00100748	0.00100386	0.000335223	0.00164925	0.156493	0.981279	0.00707906
N142078	0.000961101	0.00106227	0.00131519	0.00111285	0.00141636	0.00146694	0.00156811	0.00212454	0.00106227	0.00197279	0.0016187	0.00171986	0.00182103	0.00202337	0.00166928	0.00182103	0.00197279	0.0019222	0.00217512	0.00268097	0.0035409	0.00338914	0.00379382	0.00349031	0.00475492	0.00414791	0.00490667	0.00809348	0.0107744	0.0107239	0.021296	0.0370783	0.0691487	0.00108229	0.00141482	0.00148556	0.00183267	0.00233027	0.00201498	0.094472	0.992889	0.0191222
N142161	0.00425685	0.0049062	0.0034632	0.0030303	0.0034632	0.00411255	0.0038961	0.00425685	0.002886	0.004329	0.00505051	0.00533911	0.00425685	0.00324675	0.00483405	0.00281385	0.00281385	0.00519481	0.0037518	0.0038961	0.00512266	0.0040404	0.00519481	0.00613276	0.00505051	0.00533911	0.00663781	0.00728716	0.0114719	0.0106061	0.0191198	0.0430014	0.0962482	0.00363982	0.00654244	0.00535291	0.00628193	0.00688693	0.005725	0.155023	0.983013	0.108075
N142380	0.00189036	0.0021004	0.00175033	0.00161031	0.00189036	0.00154029	0.00224043	0.00224043	0.00147028	0.00245047	0.00182035	0.00217041	0.00217041	0.00245047	0.00308059	0.00238045	0.00308059	0.00301057	0.00266051	0.00364069	0.00441084	0.00287055	0.00343065	0.00252048	0.00364069	0.00287055	0.00364069	0.00490093	0.00707134	0.0063012	0.0129525	0.0272352	0.079045	0.000972195	0.0021923	0.00209698	0.00227941	0.00380585	0.00290225	0.10513	0.993199	0.0697176
N142443	0.00110184	0.000708327	0.000865733	0.000708327	0.00141665	0.00118054	0.00133795	0.00157406	0.000865733	0.00149536	0.00133795	0.00125925	0.00110184	0.00133795	0.00157406	0.00110184	0.000865733	0.00196757	0.00157406	0.00306942	0.00283331	0.00165276	0.00401385	0.0026759	0.00401385	0.00432866	0.00385645	0.00739808	0.00991657	0.0114119	0.0162915	0.0323469	0.0579254	0.000639061	0.00114869	0.000730984	0.000728363	0.00135511	0.00184622	0.0750845	0.99538	0.0545336
N142894	0.000250627	0.000451128	0.000200501	0.000300752	0.000150376	0.000451128	0.000601504	0.000451128	0.000300752	0.000451128	0.000401003	0.00075188	0.000651629	0.000952381	0.000651629	0.000601504	0.00085213	0.00135338	0.00125313	0.00160401	0.00270677	0.00305764	0.00390977	0.00345865	0.00531328	0.0045614	0.00561404	0.00882206	0.0154887	0.0166416	0.0318797	0.0637594	0.122105	0.00039386	0.000231692	0.000308923	0.000461723	0.000154184	0.00189641	0.183793	0.975177	0.00200904
N142909	0.0045954	0.00504496	0.00344655	0.0043956	0.00384615	0.00434565	0.0047952	0.00494505	0.0044955	0.00484515	0.00454545	0.00559441	0.004995	0.00464535	0.00474525	0.0044955	0.003996	0.00634366	0.00509491	0.00534466	0.00664336	0.00754246	0.00774226	0.00609391	0.00969031	0.00724276	0.00919081	0.00934066	0.0121379	0.011988	0.0172328	0.0333666	0.0745255	0.00379562	0.00566661	0.00617406	0.00682611	0.00683838	0.00905476	0.123276	0.987616	0.11743
N143048	0.00288489	0.00278873	0.00221175	0.00134628	0.00192326	0.00298106	0.00269257	0.00326955	0.00211559	0.00221175	0.0025964	0.0036542	0.0036542	0.00326955	0.00346187	0.00326955	0.00288489	0.00461583	0.00528897	0.00596211	0.00615444	0.00605827	0.00567362	0.00721223	0.00875084	0.00778921	0.00913549	0.00875084	0.0180787	0.017117	0.0261564	0.04837	0.0933744	0.00151166	0.00296417	0.00312885	0.00377398	0.00328762	0.00646983	0.156212	0.980063	0.0373841
N143082	0.00237431	0.00255435	0.00262187	0.00246433	0.00222802	0.00272314	0.00271189	0.0029707	0.0023518	0.00295945	0.00310573	0.00317325	0.00383715	0.00302696	0.00372463	0.00317325	0.00334204	0.00367961	0.00380339	0.00501868	0.0050862	0.00439978	0.00680785	0.00573885	0.00688662	0.00607643	0.0072467	0.00951974	0.0138633	0.0138633	0.024362	0.0499055	0.123104	0.0026	0.00385244	0.00369911	0.0040678	0.00394119	0.00583584	0.204842	0.972065	0.0450053
N143265	0.00289557	0.00326919	0.00205492	0.00289557	0.00261536	0.00345601	0.00177471	0.00317579	0.00270876	0.00317579	0.00233514	0.00354941	0.00373622	0.00280217	0.0033626	0.00280217	0.00280217	0.00410984	0.00345601	0.00373622	0.0050439	0.00429666	0.0050439	0.00345601	0.00523071	0.0050439	0.00457687	0.00775266	0.0100878	0.00980758	0.0177471	0.0413787	0.106296	0.00147886	0.00362481	0.00333483	0.00491207	0.00332884	0.00370272	0.161195	0.983315	0.0503677
N143498	0.00456995	0.00427801	0.00426679	0.00388502	0.00357063	0.0043903	0.00478329	0.00510892	0.00389625	0.00503032	0.00468224	0.0051426	0.00528857	0.0043117	0.00562542	0.00474961	0.00492926	0.00604087	0.00571525	0.00774759	0.00816304	0.00625421	0.00935325	0.00705143	0.00997081	0.00852234	0.0101055	0.0136762	0.0187739	0.0181563	0.0314732	0.0619695	0.120705	0.00471908	0.00708176	0.00753027	0.00827948	0.00791734	0.010735	0.247908	0.950792	0.113583
N143500	0.00110665	0.00119887	0.00112202	0.000952952	0.000983692	0.00110665	0.00113739	0.00101443	0.00078388	0.00121425	0.00142943	0.00133721	0.00147554	0.000906841	0.00164461	0.00136795	0.00155239	0.00185979	0.0020135	0.00210572	0.0023209	0.00218257	0.0028896	0.00244386	0.00301256	0.003197	0.00454958	0.0060866	0.00854583	0.00923748	0.0178602	0.0415917	0.10029	0.000676956	0.0010705	0.00124178	0.00149333	0.0017311	0.00212393	0.136477	0.988138	0.0141364
N143501	0.00374269	0.00315789	0.00397661	0.00385965	0.00421053	0.0045614	0.00397661	0.00409357	0.00421053	0.00374269	0.00374269	0.00573099	0.00549708	0.00432749	0.00385965	0.00526316	0.00479532	0.00538012	0.00479532	0.0045614	0.00690058	0.00479532	0.00678363	0.00339181	0.00736842	0.0071345	0.00888889	0.00748538	0.014386	0.0104094	0.0164912	0.0247953	0.0394152	0.00257533	0.00577129	0.00523023	0.00646943	0.00540088	0.00850289	0.0593767	0.995132	0.0968222
N143529	0.00125	0.00178571	0.00160714	0.00107143	0.00125	0.00133929	0.00125	0.00169643	0.00142857	0.00169643	0.00205357	0.001875	0.00169643	0.001875	0.00267857	0.00196429	0.00178571	0.00258929	0.00232143	0.003125	0.00321429	0.003125	0.00339286	0.00401786	0.00571429	0.00464286	0.00678571	0.00625	0.0109821	0.0129464	0.021875	0.0476786	0.0725	0.00105347	0.00271126	0.00193661	0.00167238	0.00231977	0.00266301	0.102417	0.990743	0.0188268
N143530	0.00711238	0.00640114	0.0056899	0.00611664	0.00369844	0.00611664	0.00497866	0.00711238	0.00625889	0.00711238	0.00825036	0.00910384	0.00796586	0.00910384	0.00924609	0.00782361	0.00825036	0.0112376	0.0105263	0.0133713	0.00981508	0.0128023	0.0170697	0.0116643	0.0184922	0.013229	0.0118065	0.0133713	0.0173542	0.014936	0.0162162	0.0227596	0.0247511	0.00621337	0.013634	0.0107332	0.0106947	0.0150574	0.0168105	0.0493104	0.987341	0.065816
N143570	0.00276484	0.00276484	0.00305588	0.00349243	0.00305588	0.00327416	0.00371071	0.00334692	0.00312864	0.00298312	0.00371071	0.00458382	0.0048021	0.00378347	0.00552969	0.00422002	0.00371071	0.006039	0.00640279	0.00713038	0.00814901	0.00814901	0.0100407	0.00902212	0.0115687	0.00974971	0.0112049	0.0152066	0.0213184	0.0183353	0.0275757	0.0437282	0.0587165	0.00242717	0.00449494	0.00436274	0.00447883	0.00514671	0.00844035	0.104227	0.984542	0.0949701
N150004	0.000142248	0.000284495	0	0	0	0.000426743	0	0.000142248	0.000142248	0.000142248	0	0.000142248	0.000142248	0.000284495	0.000142248	0.000142248	0	0.00056899	0.000284495	0.000426743	0.000711238	0.000284495	0.000426743	0.000711238	0.00170697	0.00142248	0.00170697	0.00341394	0.00668563	0.00697013	0.0174964	0.0470839	0.0881935	0.00036927	0	0.000181022	0.000180373	0	0.000177801	0.109644	0.991752	0.00170989
N150364	0.00156642	0.00125313	0.00167084	0.000835422	0.00114871	0.00125313	0.00125313	0.00093985	0.000522139	0.00135756	0.00198413	0.00271512	0.00208855	0.00104428	0.00146199	0.00104428	0.00177527	0.00261069	0.00219298	0.00240184	0.00396825	0.00386383	0.0049081	0.00532581	0.00574353	0.00741437	0.00793651	0.0137845	0.0200501	0.0181704	0.0393693	0.0848997	0.141291	0.000962658	0.00151012	0.000943822	0.00188088	0.00263796	0.00444973	0.249506	0.950077	0.0134394
N150398	0.000881679	0.000793511	0.000617175	0.000705343	0.000529007	0.000617175	0.000617175	0.000617175	0.000352671	0.00149885	0.000705343	0.00114618	0.00176336	0.000881679	0.000969847	0.00149885	0.00158702	0.00238053	0.00167519	0.00290954	0.0024687	0.00264504	0.00343855	0.00352671	0.00581908	0.00440839	0.00661259	0.0071416	0.012608	0.0137542	0.0267149	0.0536061	0.114442	0.000405451	0.00119255	0.00119255	0.000792185	0.00105815	0.00273311	0.168025	0.980575	0.00665646
N150399	0.000386772	0.000451234	0.000451234	0.000515697	0.000515697	0.000193386	0.000515697	0.000644621	0.000128924	0.000386772	0.000709083	0.000451234	0.000902469	0.000515697	0.000773545	0.00032231	0.000773545	0.000580159	0.000966931	0.00109586	0.00148263	0.00109586	0.00161155	0.00154709	0.00174048	0.00270741	0.00302972	0.00464127	0.00670405	0.00547928	0.0130858	0.0264939	0.0769032	8.16915e-05	0.000240279	0.000160186	0.000239418	0.000319798	0.00102268	0.0933466	0.99481	0.00323351
N150425	0.00152695	0.00213773	0.00229043	0.00229043	0.00213773	0.00236677	0.00190869	0.00274851	0.00175599	0.00236677	0.00236677	0.00267216	0.00313025	0.00274851	0.00335929	0.00229043	0.00244312	0.00358833	0.00259582	0.00397007	0.00488624	0.00397007	0.00572607	0.00549702	0.00656589	0.00534433	0.00801649	0.00870362	0.0128264	0.0116812	0.0218354	0.0459612	0.104443	0.00184752	0.00253593	0.00350199	0.00240651	0.00409842	0.0037955	0.161386	0.98212	0.0614818
N150576	0.00608338	0.00715692	0.00679907	0.0105565	0.00662015	0.00805153	0.00697799	0.00751476	0.00465199	0.00751476	0.0085883	0.00805153	0.0100197	0.00733584	0.00751476	0.00840938	0.00912507	0.00805153	0.00608338	0.00984076	0.0114511	0.00805153	0.0110932	0.00912507	0.0109143	0.00840938	0.00823045	0.0114511	0.0168188	0.0114511	0.0128824	0.0189658	0.0191447	0.00671376	0.00756975	0.0118483	0.0118058	0.0147838	0.0161631	0.0344033	0.992552	0.0882788
N150627	0.00282768	0.00276827	0.00300589	0.0026257	0.00236432	0.00318411	0.00292273	0.00300589	0.00241184	0.00323163	0.00323163	0.00325539	0.00371875	0.00297025	0.00369499	0.00305342	0.00302965	0.00384944	0.00346925	0.00419399	0.00521576	0.00389697	0.00539397	0.00474052	0.00571476	0.00528704	0.00602367	0.00791275	0.0110374	0.00986123	0.018368	0.0503398	0.13934	0.00226925	0.00407226	0.00345646	0.00441394	0.00412444	0.00534607	0.227598	0.968185	0.100984
N150727	0.00430828	0.00418063	0.0041168	0.00376576	0.00370193	0.00443593	0.00446785	0.00481889	0.00418063	0.00430828	0.00491463	0.00510611	0.00446785	0.00437211	0.00485081	0.00376576	0.00405298	0.00603159	0.00421254	0.00552098	0.00727621	0.00619116	0.00670177	0.0058082	0.00935057	0.00737195	0.00791447	0.0104037	0.0142652	0.0135312	0.0237753	0.0534865	0.106048	0.0042057	0.00695089	0.00706871	0.00651511	0.00776163	0.00867865	0.191228	0.972139	0.0808113
N151249	0.00727513	0.00595238	0.00462963	0.00595238	0.00496032	0.00595238	0.00760582	0.00595238	0.00363757	0.00496032	0.00462963	0.0082672	0.00727513	0.00462963	0.00760582	0.0082672	0.00628307	0.0082672	0.00595238	0.0122354	0.0082672	0.00793651	0.010582	0.0102513	0.0102513	0.00694444	0.0109127	0.0142196	0.0175265	0.0135582	0.0188492	0.0274471	0.0274471	0.00557533	0.00971776	0.00971776	0.0114985	0.0109129	0.00656207	0.0492478	0.99089	0.215636
N151307	0.00194363	0.00194363	0	0.00291545	0	0.000971817	0.00194363	0.000971817	0	0.00291545	0	0	0.00194363	0.000971817	0.00291545	0.00194363	0.00194363	0.00194363	0.00194363	0.00194363	0.00291545	0.00291545	0.000971817	0.000971817	0.00388727	0.00194363	0.000971817	0.00194363	0.00291545	0.00194363	0.00680272	0.0126336	0.0126336	0	0	0.00334764	0.00222376	0	0.00109602	0.0141718	0.999655	0.0383169
N151400	0.000505051	0.000252525	0	0	0.000126263	0.000252525	0.000252525	0.0010101	0.000505051	0.000505051	0.000505051	0.000505051	0.000505051	0.000505051	0.00151515	0.000378788	0.000505051	0.000757576	0.000883838	0.00138889	0.00151515	0.00113636	0.00214646	0.00265152	0.00252525	0.0030303	0.0040404	0.00694444	0.00770202	0.00858586	0.022096	0.0606061	0.198359	0	0.000384884	0.000192442	0.000767008	0.00057629	0.000945087	0.295351	0.949974	0.00253164
N151519	0.00124103	0.00182277	0.00124103	0.00124103	0.00151251	0.00201668	0.00267597	0.00139616	0.00127981	0.00166764	0.00170642	0.00205546	0.00197789	0.00182277	0.00205546	0.00178398	0.00190033	0.0024045	0.00236572	0.00333527	0.00492534	0.00333527	0.0045763	0.00445996	0.00585612	0.00554586	0.00663176	0.00903626	0.0133411	0.0139228	0.0266822	0.0527826	0.0955207	0.00134672	0.0021606	0.00270075	0.00281067	0.001977	0.00300638	0.144411	0.983729	0.0233703
N151520	0.00270819	0.00240728	0.00255774	0.00142932	0.00203114	0.00240728	0.00278342	0.00180546	0.00142932	0.00255774	0.0035357	0.00293387	0.00293387	0.0030091	0.00263296	0.00225683	0.00376138	0.00361092	0.00376138	0.0051907	0.0051907	0.00466411	0.00646957	0.00609343	0.00804935	0.0073723	0.00887685	0.0112089	0.0154217	0.0163244	0.0223426	0.0362597	0.0798917	0.00122139	0.00299373	0.00311348	0.00250572	0.00358603	0.00482234	0.12424	0.987482	0.0209631
N151565	0.000386997	0.000541796	0.000386997	0.000928793	0.000541796	0.000464396	0.000619195	0.00100619	0.000464396	0.000696594	0.000309598	0.00116099	0.000696594	0.000541796	0.00123839	0.000696594	0.000851393	0.00123839	0.00139319	0.00131579	0.00239938	0.00139319	0.00309598	0.00216718	0.00386997	0.00379257	0.00634675	0.0100619	0.0165635	0.0177245	0.0350619	0.0729102	0.121827	0.000743886	0.000486221	0.000486221	0.000968955	0.000728022	0.00274602	0.186914	0.97245	0.00654395
N151606	0.00357545	0.00367209	0.0039942	0.00380093	0.00354324	0.00386536	0.00418747	0.00470285	0.00392978	0.00566919	0.00473506	0.0051216	0.0051216	0.00460622	0.00560477	0.00525044	0.00486391	0.00686101	0.0059913	0.00869705	0.00840715	0.00779514	0.011435	0.00792398	0.0115316	0.00901917	0.0106619	0.0119826	0.0168143	0.0163956	0.0209051	0.0354324	0.0578193	0.00335073	0.0063398	0.00639743	0.00608736	0.00753658	0.00996317	0.101067	0.987587	0.0723244
N151607	0.000383644	0.000351674	0.000287733	0.000479555	0.000287733	0.000671377	0.000639407	0.000831229	0.000639407	0.00099108	0.000703347	0.00143866	0.00153458	0.00134275	0.00147064	0.00124684	0.00179034	0.00246172	0.00249369	0.00418811	0.00469964	0.00444388	0.00652195	0.00601042	0.00939928	0.00860002	0.0124684	0.0181591	0.0259919	0.025896	0.0422008	0.0766009	0.124461	0.00103496	0.000596889	0.000656578	0.00136792	0.00148955	0.00451426	0.227008	0.953223	0.0038834
N151653	0.00129955	0.00233918	0.00233918	0.00181936	0.00259909	0.00350877	0.00272904	0.00181936	0.00220923	0.00311891	0.00194932	0.00181936	0.00389864	0.00324886	0.00298895	0.00246914	0.00272904	0.00233918	0.00194932	0.00376868	0.002859	0.00272904	0.00415854	0.00415854	0.00558804	0.00454841	0.005718	0.00740741	0.011306	0.00896686	0.0188434	0.0292398	0.0419753	0.0014664	0.00179714	0.00215656	0.00358139	0.00215269	0.00423637	0.0567083	0.996345	0.0749597
N151777	0.0011505	0.000876568	0.00175314	0.00120528	0.00120528	0.00131485	0.00147921	0.00164357	0.00164357	0.00142442	0.00158878	0.00131485	0.00202706	0.00175314	0.00213664	0.00191749	0.00224621	0.00273928	0.00268449	0.00334192	0.00372542	0.00350627	0.00520462	0.00476634	0.00608119	0.00575248	0.00695776	0.00969704	0.0141347	0.0154495	0.0229551	0.0422396	0.0765901	0.00132424	0.00219094	0.00137948	0.0016171	0.00178201	0.0043039	0.110825	0.989892	0.0182386
N151847	0.00322061	0.00304169	0.00143138	0.00143138	0.00143138	0.00304169	0.00304169	0.00286277	0.00196815	0.00304169	0.00178923	0.00375738	0.00286277	0.00214707	0.002326	0.00339953	0.002326	0.00339953	0.0039363	0.0039363	0.00411523	0.0039363	0.00518876	0.00322061	0.00805153	0.00554661	0.00608338	0.00805153	0.00805153	0.00966184	0.0214707	0.0366792	0.0526033	0.00131251	0.00205892	0.00360311	0.00230798	0.00333974	0.00530849	0.0739197	0.994396	0.139016
N151864	0.00322175	0.00251454	0.0026717	0.00298601	0.00306459	0.0041647	0.00220022	0.00212164	0.00385039	0.00353607	0.00385039	0.00385039	0.00408612	0.00235738	0.00432186	0.00275028	0.0026717	0.00463618	0.00369323	0.00471476	0.00581487	0.00479334	0.00581487	0.00589345	0.00754361	0.00667924	0.00746503	0.00950809	0.0144586	0.0102939	0.0166588	0.0322961	0.0747289	0.00199317	0.00354193	0.00366406	0.0047462	0.00414515	0.0059981	0.113471	0.990217	0.155723
N151881	0.00385453	0.00385453	0.00272084	0.00340105	0.00272084	0.00353709	0.00326501	0.00403592	0.00276619	0.0042173	0.00367314	0.0042173	0.00448939	0.00281154	0.00439869	0.00417196	0.00417196	0.00480682	0.00535099	0.00666606	0.00925086	0.00625794	0.00743697	0.00748231	0.0102485	0.00884274	0.011881	0.0139216	0.0190005	0.0181389	0.0306548	0.0525122	0.0784056	0.00360096	0.00537982	0.00495952	0.00536053	0.00637707	0.00825638	0.141986	0.978299	0.0770541
N152001	0.00358077	0.00482027	0.0037185	0.00440711	0.00399394	0.00592205	0.00468255	0.00523344	0.00440711	0.00440711	0.00358077	0.00605977	0.00344305	0.00468255	0.00495799	0.00454483	0.0037185	0.00482027	0.00509572	0.00440711	0.00633522	0.00578433	0.00716155	0.00509572	0.00647294	0.00785016	0.00716155	0.00922738	0.0115687	0.00895193	0.0187302	0.030712	0.0633522	0.00336326	0.00637508	0.00461643	0.00569509	0.00438872	0.0071253	0.0987889	0.99154	0.0611249
N152235	0.000340909	0.000681818	0.000454545	0.000568182	0.000227273	0.000795455	0.000568182	0.000227273	0.000454545	0.000568182	0.000340909	0.000340909	0.000454545	0.000340909	0.000568182	0.000795455	0.000454545	0.00113636	0.000454545	0.000909091	0.00125	0.00170455	0.000909091	0.00204545	0.00340909	0.00284091	0.00488636	0.00534091	0.0114773	0.0121591	0.0223864	0.0526136	0.0840909	0	0.000461368	0.000615157	0.000459713	0.00046054	0.00135947	0.111178	0.990239	0.019813
N152637	0.00238393	0.00232433	0.000953573	0.00143036	0.00178795	0.00214554	0.00184755	0.00214554	0.00148996	0.00226474	0.00256273	0.00244353	0.00256273	0.00262233	0.00327791	0.00268192	0.00226474	0.00387389	0.00297992	0.00458907	0.00524465	0.00476786	0.00601943	0.00488706	0.00804577	0.00756899	0.00888015	0.0116217	0.0141844	0.0138864	0.0214554	0.0356398	0.0629954	0.00192426	0.00242564	0.00215613	0.00250646	0.00224194	0.00502967	0.0927686	0.99193	0.0313959
N152679	0.00225225	0.00105105	0.0012012	0.00135135	0.00255255	0.0021021	0.00255255	0.0033033	0.00225225	0.00165165	0.0027027	0.00195195	0.00225225	0.00195195	0.00195195	0.0021021	0.00255255	0.0024024	0.0033033	0.0033033	0.00345345	0.0045045	0.0036036	0.00585586	0.00660661	0.00525526	0.00840841	0.00990991	0.0117117	0.0127628	0.0202703	0.0468468	0.115465	0.00120197	0.00282829	0.0025926	0.000939383	0.000941072	0.00509293	0.177065	0.979497	0.0155516
N152730	0.00117206	0.0012502	0.00148461	0.00101578	0.000859509	0.00117206	0.00101578	0.000703235	0.00101578	0.00148461	0.000937647	0.00117206	0.00148461	0.00117206	0.00179716	0.00164088	0.00156274	0.00148461	0.00164088	0.00234412	0.00296921	0.00195343	0.00304735	0.00289108	0.00453196	0.00390686	0.00484451	0.00820441	0.0138303	0.0130489	0.0286764	0.0668855	0.139475	0.00114162	0.00111928	0.000994914	0.00210661	0.00111727	0.00232087	0.216869	0.967951	0.0290141
N152845	0.00262493	0.00359712	0.00272215	0.00262493	0.00213883	0.00359712	0.00301381	0.0034999	0.00233327	0.00311102	0.00262493	0.00427766	0.00281937	0.00233327	0.00359712	0.00311102	0.00272215	0.00408322	0.00311102	0.00408322	0.00476376	0.00534707	0.00563873	0.00486098	0.00554151	0.00573595	0.00651371	0.00806922	0.0148746	0.0122497	0.0226521	0.0391795	0.0613455	0.00180719	0.00398662	0.00310071	0.0044137	0.00442163	0.0040607	0.0910193	0.991981	0.046551
N152949	0.00276319	0.00293744	0.00291255	0.00298723	0.00293744	0.0030868	0.00323617	0.00338553	0.00288766	0.00323617	0.00341042	0.00378382	0.00405765	0.00318638	0.0042817	0.00316148	0.00365936	0.00492893	0.0038585	0.00517786	0.00577531	0.00515297	0.00704488	0.00599935	0.00769212	0.00714446	0.00799084	0.0107291	0.0153344	0.0163053	0.0299221	0.0575291	0.121754	0.00273488	0.00527184	0.00490827	0.00470954	0.00499019	0.00723139	0.217153	0.965621	0.122299
N153006	0.00366415	0.00492044	0.00481575	0.00387353	0.00408291	0.00670017	0.0053392	0.00471106	0.00397822	0.00554858	0.00512982	0.00502513	0.00617672	0.00408291	0.00680486	0.00544389	0.00670017	0.00670017	0.00565327	0.00900335	0.00889866	0.00764238	0.00984087	0.00931742	0.0095268	0.00816583	0.00879397	0.00994556	0.0151801	0.0105737	0.0110972	0.0184255	0.0216709	0.00325688	0.00789885	0.00605019	0.0060285	0.00838796	0.00924392	0.033986	0.995772	0.258883
N153026	0.00226757	0.00388727	0.00518303	0.0016197	0.00194363	0.0058309	0.00356333	0.00291545	0.00259151	0.00356333	0.00453515	0.00388727	0.00323939	0.00453515	0.00485909	0.00226757	0.0016197	0.00615484	0.00323939	0.0058309	0.00518303	0.0058309	0.00712666	0.00291545	0.00680272	0.00712666	0.00777454	0.00485909	0.0123097	0.0126336	0.0142533	0.0252672	0.0401684	0.0029019	0.00426768	0.0037935	0.00519736	0.00426003	0.00791773	0.0574426	0.995981	0.108589
N153244	0.000858001	0.000643501	0.000858001	0.00032175	0.000858001	0.000858001	0.000858001	0.000536251	0.000643501	0.000750751	0.00117975	0.000965251	0.00117975	0.001716	0.001287	0.000858001	0.00160875	0.000750751	0.00203775	0.00289575	0.003003	0.00289575	0.00396825	0.0036465	0.004719	0.00396825	0.00697126	0.0104033	0.0172673	0.0160875	0.030459	0.0589876	0.0806521	0.000161581	0.000792096	0.000475258	0.000473554	0.00173949	0.0026452	0.116383	0.986932	0.00452484
N153335	0.00328093	0.00519481	0.00300752	0.00287081	0.00273411	0.00300752	0.0050581	0.00314422	0.00300752	0.00410116	0.00423787	0.00464798	0.00451128	0.00410116	0.00451128	0.00355434	0.00341763	0.00519481	0.00560492	0.00738209	0.00779221	0.00628845	0.00710868	0.00533151	0.00847573	0.00724539	0.00820232	0.00806562	0.0128503	0.0140807	0.0133971	0.0239234	0.0278879	0.00334341	0.00512186	0.00430236	0.0051035	0.00347661	0.00523194	0.0408301	0.996335	0.13155
N153384	0.00515814	0.00488666	0.00461518	0.00393647	0.00312203	0.00407221	0.00407221	0.00366499	0.00542962	0.00434369	0.00556536	0.0050224	0.00583684	0.00244333	0.00352925	0.00475092	0.00434369	0.00529388	0.00434369	0.00447944	0.00665128	0.00610832	0.00610832	0.00556536	0.00542962	0.0070585	0.00841591	0.00855165	0.00990905	0.00909461	0.0157459	0.0305416	0.0472377	0.00347732	0.00617932	0.00511392	0.00594485	0.00744442	0.00816224	0.0724411	0.993983	0.0977702
N153439	0.00321479	0.00442033	0.00421941	0.00341571	0.00261202	0.00361664	0.00281294	0.00361664	0.00180832	0.00281294	0.00281294	0.00361664	0.00381756	0.00301386	0.00421941	0.00200924	0.00442033	0.0066305	0.00401849	0.00602773	0.00984529	0.00683142	0.00723327	0.0066305	0.0116536	0.0104481	0.0136628	0.0168776	0.02391	0.0251155	0.0379747	0.0528431	0.0685152	0.0035245	0.00691108	0.00268764	0.0068863	0.00498238	0.0113135	0.127906	0.976736	0.0377129
N153475	0.00267587	0.00284851	0.0037117	0.00293483	0.00258956	0.00336642	0.00302115	0.00302115	0.00310747	0.0037117	0.0037117	0.0037117	0.00379801	0.00250324	0.00440224	0.00431593	0.00293483	0.00492016	0.00664653	0.00483384	0.00776867	0.00707812	0.00811394	0.00802762	0.00914976	0.00863185	0.0125162	0.0142426	0.0204575	0.0183858	0.0305568	0.0566249	0.0908071	0.00214627	0.00517975	0.00437042	0.00516119	0.00436258	0.00922124	0.166356	0.973466	0.139333
N153476	0.0025856	0.0027423	0.00227219	0.00219384	0.00266395	0.00329076	0.00235054	0.0025856	0.00235054	0.00329076	0.00344747	0.00297736	0.002899	0.0025856	0.00352582	0.00211549	0.00438768	0.00391757	0.00336911	0.00407428	0.00571966	0.00462274	0.00783515	0.00673823	0.0077568	0.00626812	0.0101857	0.0115177	0.0153569	0.014495	0.0256993	0.0499882	0.103032	0.00218483	0.00401641	0.00428417	0.00360181	0.00307372	0.00565441	0.171991	0.977666	0.107277
N153617	0.00116279	0.00155039	0.00155039	0.00142119	0.000839793	0.00167959	0.00122739	0.00142119	0.00155039	0.00193798	0.00174419	0.00200258	0.00142119	0.00174419	0.00174419	0.00142119	0.00206718	0.00206718	0.00245478	0.00394057	0.00400517	0.00303618	0.00342377	0.00277778	0.00536176	0.00458656	0.00626615	0.00710594	0.0142765	0.0141473	0.02823	0.0563307	0.134948	0.00137621	0.00166065	0.00145307	0.00248205	0.00186488	0.00305832	0.211817	0.970464	0.060237
N153654	0.00350526	0.00307604	0.00257529	0.00228915	0.00293297	0.00414908	0.00314758	0.00250376	0.00193147	0.00393447	0.00407754	0.00371987	0.00329065	0.00364833	0.00436369	0.00407754	0.00321911	0.00486444	0.00472137	0.00579441	0.0073682	0.00679591	0.00822663	0.00650976	0.00915659	0.00808355	0.0116603	0.0126618	0.0208885	0.0203162	0.0316189	0.0583017	0.100651	0.00219935	0.00579509	0.0044474	0.00564003	0.00497753	0.00728043	0.185246	0.969678	0.115226
N153673	0.002083	0.00288415	0.00192277	0.00256369	0.00192277	0.00248358	0.00152219	0.002083	0.002083	0.00200288	0.00240346	0.00256369	0.00256369	0.00240346	0.00304438	0.00248358	0.00320461	0.00288415	0.00296427	0.00400577	0.00488704	0.00504727	0.00560808	0.00424611	0.00680981	0.00592854	0.00745073	0.00921327	0.0136196	0.0125781	0.020109	0.0453453	0.0991027	0.00102549	0.00238788	0.0045244	0.002755	0.00376357	0.00382668	0.151877	0.983822	0.148024
N153675	0.000918274	0.00157418	0.000524728	0.000262364	0.000262364	0.00065591	0.00104946	0.00065591	0.000131182	0.00104946	0.00065591	0.001443	0.00118064	0.000524728	0.00065591	0.000524728	0.00104946	0.00118064	0.000918274	0.00183655	0.004329	0.00183655	0.00327955	0.00196773	0.00419782	0.00524728	0.00498491	0.00760855	0.0116752	0.0139053	0.027417	0.0549652	0.108094	0.000588614	0.00192366	0.000961829	0.000958381	0.000768083	0.00226731	0.154852	0.982862	0.0510915
N153700	0.00216372	0.00171295	0.00207357	0.00117202	0.00216372	0.00171295	0.00243419	0.00144248	0.00198341	0.00252434	0.00342589	0.00270465	0.00297512	0.00216372	0.00288496	0.00342589	0.00333574	0.0036062	0.00351605	0.00468806	0.00549946	0.00477822	0.00766318	0.00604039	0.00649116	0.00685179	0.0080238	0.0115398	0.0172196	0.0164082	0.0275875	0.0544537	0.124775	0.00175788	0.00219352	0.00203684	0.00359073	0.00297158	0.00630958	0.211843	0.968445	0.0196689
N153773	0.0116352	0.0110063	0.0081761	0.0072327	0.00597484	0.00786164	0.00691824	0.0100629	0.0091195	0.00880503	0.00691824	0.0103774	0.00660377	0.0116352	0.00534591	0.00660377	0.00628931	0.00974843	0.00974843	0.0122642	0.0113208	0.0110063	0.0119497	0.00880503	0.013522	0.0100629	0.0141509	0.0160377	0.018239	0.0216981	0.0245283	0.0415094	0.0484277	0.0116329	0.0197692	0.0167278	0.0250017	0.0197337	0.0231515	0.114393	0.970855	0.133693
N153842	0.00206964	0.00133918	0.00194789	0.00292184	0.00121743	0.00231312	0.00267835	0.00255661	0.00219138	0.0036523	0.00267835	0.00182615	0.00243487	0.00231312	0.00316533	0.00219138	0.0028001	0.00511322	0.0028001	0.00426102	0.00535671	0.00401753	0.00486973	0.00523496	0.00791332	0.00486973	0.00742635	0.0112004	0.0138787	0.0144875	0.0253226	0.0485756	0.111882	0.00225487	0.00261271	0.00381858	0.00200257	0.00341049	0.00513243	0.180437	0.977385	0.100269
N153899	0.00306087	0.00341211	0.00291033	0.00331176	0.00381354	0.0043655	0.00386372	0.00336193	0.00346229	0.00376336	0.00356265	0.00506799	0.00466657	0.00381354	0.00476692	0.00406443	0.00441568	0.00446585	0.00466657	0.00541924	0.00582066	0.00501781	0.00622209	0.00516835	0.00647298	0.00592102	0.0059712	0.00747654	0.0111395	0.00938331	0.0153043	0.0283506	0.043655	0.00282159	0.00441127	0.00441127	0.00581093	0.00403019	0.00602181	0.0635468	0.99542	0.0536423
N153976	0.00386862	0.00394447	0.00333763	0.00379276	0.00386862	0.00402033	0.00402033	0.00485474	0.00242737	0.00333763	0.00447546	0.00561329	0.005765	0.00455132	0.00500645	0.00432375	0.00515816	0.00538572	0.00470303	0.00591671	0.0071304	0.00697868	0.00788895	0.00766138	0.0114541	0.00819237	0.0093302	0.0122886	0.0157779	0.0143366	0.022529	0.0339073	0.0687249	0.00375277	0.00657025	0.00473058	0.00680856	0.00498443	0.0089056	0.116306	0.987191	0.139705
N154076	0.00370813	0.00287081	0.00263158	0.00299043	0.0034689	0.00322967	0.00394737	0.00370813	0.00322967	0.00394737	0.00442584	0.00442584	0.0041866	0.00334928	0.00454545	0.00394737	0.00466507	0.00610048	0.0062201	0.00741627	0.00885167	0.00777512	0.00944976	0.00825359	0.0120813	0.00909091	0.0156699	0.0196172	0.0245215	0.0217703	0.0303828	0.0422249	0.0385167	0.00181696	0.00601224	0.00445351	0.00532506	0.00666829	0.00940467	0.0700474	0.985014	0.384838
N160069	0.0025974	0.00298701	0.00285714	0.00168831	0.00324675	0.00220779	0.00402597	0.00415584	0.00285714	0.00246753	0.00233766	0.00311688	0.00428571	0.00337662	0.00519481	0.00272727	0.00350649	0.00454545	0.00454545	0.00363636	0.00467532	0.00519481	0.00545455	0.00623377	0.0061039	0.0038961	0.00649351	0.00987013	0.0122078	0.0105195	0.011039	0.0219481	0.0363636	0.00224401	0.00366683	0.00311681	0.00200953	0.00475833	0.0043219	0.0501513	0.996937	0.0863263
N160138	0.00190878	0.00170786	0.00130601	0.00120555	0.00180832	0.00170786	0.00221017	0.00150693	0.00190878	0.00261202	0.00231063	0.00311433	0.00221017	0.00251155	0.00311433	0.0029134	0.00221017	0.00381756	0.00442033	0.00512357	0.00683142	0.0045208	0.00562588	0.00612819	0.00642958	0.00592727	0.00753466	0.00984529	0.0142656	0.015873	0.0224031	0.0370705	0.0903155	0.0012905	0.00205603	0.0036376	0.00441251	0.0034732	0.00528163	0.138902	0.985913	0.0178926
N160205	0.00296069	0.00288478	0.00279368	0.00289996	0.00282404	0.00299106	0.00311252	0.00285441	0.00267221	0.00306697	0.00367429	0.003401	0.00394759	0.00289996	0.00346173	0.00305179	0.00387167	0.00443345	0.00435753	0.00481302	0.00516223	0.00479784	0.00649834	0.00551144	0.0067109	0.00613394	0.00766743	0.00821402	0.011448	0.0106737	0.0151223	0.0270562	0.0493449	0.00236843	0.00368408	0.00377339	0.00380436	0.00454669	0.00521944	0.070891	0.995092	0.115617
N160216	0.00116187	0.00143705	0.00131474	0.00131474	0.00113129	0.00119244	0.00113129	0.00165107	0.00119244	0.00180395	0.00183453	0.00201798	0.00207913	0.00155935	0.00259891	0.00180395	0.00192625	0.00247661	0.00247661	0.00412768	0.00357733	0.00400538	0.005473	0.00476977	0.0072158	0.00587048	0.0072158	0.0105179	0.0162356	0.01541	0.0242769	0.0447013	0.0655537	0.00115709	0.00127058	0.00136134	0.00198947	0.00212893	0.00325364	0.0950455	0.990885	0.0174812
N160302	0.00574903	0.00541736	0.00409066	0.00442233	0.00364842	0.00563847	0.00519624	0.00497512	0.00364842	0.00674406	0.00574903	0.00475401	0.00685462	0.00541736	0.00630182	0.00674406	0.00707573	0.00519624	0.00619127	0.00873411	0.00895522	0.00851299	0.0102819	0.00862355	0.0114981	0.00818132	0.013267	0.0119403	0.0181316	0.0172471	0.0200111	0.0365948	0.0818132	0.00486548	0.00693859	0.00585444	0.00864215	0.00930701	0.015334	0.156753	0.9778	0.0792345
N160311	0.00123686	0.0021645	0.00170068	0.00185529	0.00200989	0.00231911	0.00170068	0.00154607	0.00170068	0.00247372	0.00200989	0.00200989	0.00371058	0.00200989	0.00340136	0.00139147	0.00200989	0.00371058	0.00262832	0.00510204	0.00463822	0.00371058	0.00479283	0.00448361	0.00726654	0.0063389	0.00695733	0.00912183	0.0140693	0.0151515	0.0279839	0.0431354	0.059833	0.00118328	0.000696074	0.00208822	0.0032367	0.00162126	0.00341844	0.0877219	0.991462	0.0184192
N160445	0.00764037	0.00675195	0.00461976	0.00604122	0.00639659	0.00764037	0.00604122	0.00604122	0.00533049	0.00764037	0.007285	0.0083511	0.00799574	0.00746269	0.00764037	0.00568586	0.00817342	0.00995025	0.007285	0.00995025	0.00923952	0.0104833	0.00746269	0.00781805	0.0119048	0.00710732	0.0131485	0.0101279	0.0142146	0.00977257	0.0165245	0.0241649	0.0399787	0.00715153	0.00968269	0.0143571	0.0119768	0.011665	0.0114781	0.0733911	0.989965	0.169756
N160607	0.00348932	0.00325032	0.00303523	0.00292768	0.00289183	0.00344152	0.00363271	0.00383586	0.00321447	0.00365661	0.00366856	0.00396731	0.00474404	0.00363271	0.00454089	0.00391951	0.00431385	0.00555662	0.00540127	0.00671574	0.00744467	0.00560442	0.00889059	0.00736102	0.00958367	0.00808996	0.0102648	0.0127623	0.0186177	0.0172793	0.026612	0.0506309	0.0944984	0.00298242	0.00449686	0.00604751	0.00523121	0.00667791	0.00879017	0.171137	0.974947	0.219836
N160873	0.00481414	0.00499695	0.00365631	0.00383912	0.00383912	0.0047532	0.00645948	0.00603291	0.00335161	0.00572821	0.0055454	0.00645948	0.00627666	0.0063376	0.00566728	0.00572821	0.00658135	0.00652041	0.00694698	0.00865326	0.00981109	0.0101158	0.0122486	0.0095064	0.0127361	0.011883	0.0129799	0.0141987	0.0196222	0.0157831	0.0223035	0.0330896	0.0426569	0.00365652	0.00705431	0.00647609	0.00841178	0.0101585	0.0152206	0.0790835	0.987301	0.237592
N160987	0.00598086	0.00562201	0.00299043	0.00550239	0.0041866	0.00490431	0.00669856	0.00514354	0.00526316	0.00610048	0.00514354	0.00657895	0.00729665	0.00502392	0.00789474	0.00645933	0.00777512	0.00933014	0.00885167	0.00992823	0.0101675	0.00956938	0.0139952	0.011244	0.0154306	0.012201	0.0148325	0.0188995	0.027512	0.0246411	0.0344498	0.0494019	0.0629187	0.00696806	0.00996293	0.0111016	0.0133308	0.0116499	0.0195713	0.146274	0.962184	0.229986
N161393	0.00248988	0.00186741	0.0026455	0.00311236	0.0026455	0.00202303	0.00202303	0.00342359	0.0017118	0.00404606	0.00342359	0.00295674	0.00342359	0.00404606	0.00529101	0.00295674	0.00389045	0.00638033	0.00622471	0.00575786	0.00793651	0.00731404	0.00762527	0.0087146	0.0096483	0.00980392	0.0116713	0.00902583	0.0168067	0.0189854	0.0262994	0.0375039	0.0557112	0.000789752	0.0018067	0.0023229	0.00462914	0.00386455	0.00811223	0.090268	0.98967	0.0201578
N161784	0.00312945	0.00355619	0.00312945	0.00284495	0.00398293	0.00512091	0.00312945	0.00412518	0.0029872	0.00469417	0.00497866	0.00398293	0.00483642	0.00554765	0.00512091	0.00398293	0.00384068	0.00398293	0.0059744	0.00782361	0.00625889	0.00654339	0.0105263	0.0059744	0.0109531	0.00853485	0.0105263	0.0135135	0.0157895	0.0152205	0.0152205	0.0277383	0.0339972	0.00231796	0.00522699	0.00545425	0.00475536	0.00612502	0.00625005	0.0530621	0.994415	0.294061
N161789	0.00124717	0.00102041	0.00181406	0.00147392	0.00113379	0.00147392	0.00113379	0.00147392	0.00181406	0.00204082	0.00260771	0.00170068	0.00192744	0.00204082	0.00260771	0.00136054	0.00260771	0.00306122	0.00340136	0.00362812	0.0053288	0.00521542	0.00680272	0.00657596	0.00804989	0.00725624	0.00804989	0.0109977	0.0183673	0.0178005	0.0363946	0.0611111	0.102721	0.00177042	0.00250724	0.00135005	0.0028826	0.00327282	0.00378866	0.170704	0.974672	0.0147246
N161799	0.00185726	0.00256478	0.00212258	0.00221102	0.00176882	0.00274166	0.00265322	0.00318387	0.00168037	0.00300699	0.00247634	0.00336075	0.00300699	0.00327231	0.00406828	0.00265322	0.00336075	0.00451048	0.00291855	0.00442204	0.00557177	0.00610241	0.00769435	0.00654462	0.0086672	0.00813655	0.0114089	0.0144158	0.0220218	0.0222871	0.0336959	0.0642965	0.101442	0.00234532	0.00410613	0.00410613	0.00360044	0.00377086	0.00596893	0.184043	0.968352	0.0376935
N161814	0.00207039	0.00310559	0.00351967	0.00165631	0.00289855	0.00414079	0.00310559	0.00414079	0.00227743	0.00372671	0.00331263	0.0057971	0.00186335	0.00351967	0.00434783	0.00393375	0.0047619	0.00496894	0.00455487	0.0057971	0.00351967	0.00517598	0.00600414	0.0047619	0.00724638	0.0057971	0.00848861	0.010352	0.0173913	0.0180124	0.0242236	0.0364389	0.0561077	0.00202371	0.00462959	0.00496028	0.003954	0.00363101	0.00844481	0.0875481	0.991135	0.0598006
N161842	0.000664231	0.000929924	0.000531385	0.000797077	0.000664231	0.000730654	0.000664231	0.000664231	0.00106277	0.000996347	0.000730654	0.00146131	0.00112919	0.00132846	0.00146131	0.000797077	0.00212554	0.00159415	0.00179342	0.00185985	0.00332116	0.00325473	0.00252408	0.00285619	0.00398539	0.00418466	0.00551312	0.00896712	0.0147459	0.0144802	0.031086	0.0642312	0.132913	0.00053412	0.000733137	0.00157101	0.000939225	0.00167273	0.00226314	0.204737	0.970891	0.0070906
N161875	0.00247036	0.00016469	0.000329381	0.000823452	0.000823452	0.000329381	0.000823452	0.00115283	0.000988142	0.00115283	0.000988142	0.00131752	0.0016469	0.00131752	0.00148221	0.00214097	0.00115283	0.00197628	0.00263505	0.00296443	0.00312912	0.00477602	0.00362319	0.00395257	0.00428195	0.00625823	0.00658762	0.0100461	0.0153162	0.0148221	0.029809	0.0591238	0.0876153	0.000505074	0.000495191	0.000495191	0	0.000988606	0.00194552	0.128682	0.985191	0.00513153
N161877	0.00304685	0.00295979	0.00257427	0.002823	0.00279812	0.00317121	0.00315877	0.00361891	0.00273594	0.00383032	0.00339506	0.00401686	0.0041661	0.0035816	0.00457649	0.00384276	0.00378058	0.00480034	0.00448944	0.00586984	0.00696422	0.00618075	0.0071632	0.00651652	0.0091281	0.00726269	0.00900374	0.0106577	0.0150601	0.0138787	0.0200346	0.033764	0.0502419	0.00235099	0.00384164	0.00449177	0.00467196	0.00416906	0.00657905	0.0777547	0.992662	0.111924
N161879	0.00588697	0.00353218	0.00523286	0.00562533	0.00392465	0.0048404	0.00510204	0.00588697	0.0030089	0.00523286	0.00470958	0.0048404	0.00575615	0.00418629	0.00706436	0.00392465	0.0048404	0.00837258	0.00601779	0.00758765	0.00654108	0.00562533	0.0096808	0.00601779	0.0104657	0.00654108	0.00994244	0.00876504	0.0130822	0.00981162	0.0117739	0.0197541	0.0236787	0.0049889	0.00754073	0.00468748	0.00568604	0.00467907	0.00720637	0.0360374	0.996304	0.246875
N161896	0.0112023	0.0154515	0.0105263	0.0088846	0.00869145	0.0095606	0.00994689	0.0111057	0.00820859	0.0107195	0.0129406	0.011492	0.0103332	0.00878803	0.00869145	0.00985031	0.0095606	0.00975374	0.0088846	0.0111057	0.0107195	0.01014	0.0110092	0.0100435	0.0113955	0.0118783	0.00936746	0.0103332	0.0137132	0.0116852	0.0161275	0.0289715	0.0462578	0.0151056	0.0246075	0.0186835	0.0236111	0.0186499	0.0208127	0.106621	0.977172	0.120633
N161897	0.00236696	0.00259943	0.00249377	0.0021979	0.00200769	0.00255717	0.00249377	0.0027051	0.00262057	0.00262057	0.00306437	0.00255717	0.00380405	0.00291644	0.00374065	0.00350818	0.00346591	0.00445919	0.00475506	0.00610761	0.00579061	0.00570607	0.00790397	0.00627668	0.00898178	0.00872818	0.0108627	0.0152796	0.0218944	0.0224228	0.0389281	0.06786	0.109176	0.00273153	0.00403773	0.00395533	0.00418747	0.00526431	0.00748661	0.207936	0.95982	0.0650548
N161934	0.004498	0.00433384	0.00423534	0.00380852	0.00311905	0.00485915	0.0035787	0.00456366	0.00390702	0.00472782	0.00453083	0.00495765	0.00485915	0.004498	0.00545013	0.00416968	0.00479349	0.00564712	0.0054173	0.0070589	0.00771554	0.00633659	0.00817519	0.00761705	0.0096198	0.00929148	0.0103749	0.0133955	0.0164489	0.0154967	0.0200932	0.0362466	0.0537461	0.00347133	0.00657993	0.00640976	0.00582158	0.00685123	0.00935997	0.0907141	0.989543	0.0954108
N161963	0.00282326	0.00451722	0.00395257	0.0031997	0.00263505	0.00414079	0.004329	0.00414079	0.00338792	0.00508187	0.00489366	0.00357613	0.00301148	0.00376435	0.00338792	0.00451722	0.004329	0.00658762	0.00357613	0.00376435	0.00545831	0.00470544	0.00658762	0.00527009	0.00978731	0.00903444	0.00790514	0.0095991	0.0105402	0.0127988	0.0161867	0.0225861	0.0374553	0.0029221	0.00429738	0.00401089	0.00485291	0.00543359	0.00759764	0.0556966	0.995542	0.177289
N161980	0.00090036	0.00080032	0.00090036	0.0010004	0.00110044	0.0010004	0.00110044	0.00110044	0.00090036	0.00180072	0.0015006	0.00170068	0.00160064	0.00170068	0.0020008	0.0020008	0.00190076	0.0030012	0.00280112	0.0035014	0.00370148	0.0040016	0.00430172	0.00360144	0.00690276	0.00590236	0.005002	0.0095038	0.0136054	0.0111044	0.017507	0.0318127	0.0484194	0.000837345	0.00136827	0.00177875	0.00163604	0.00177556	0.00362859	0.0646964	0.995709	0.0123547
N161997	0.00032523	0.00032523	0.00032523	8.13074e-05	0.000650459	0.000243922	0.000487845	0.000243922	0.00032523	0.000487845	0.000406537	0.000650459	0.000731767	0.001057	0.000894382	0.000975689	0.000975689	0.00146353	0.00211399	0.00170746	0.00227661	0.00235792	0.00382145	0.00382145	0.00561021	0.00650459	0.00780551	0.0102447	0.0181316	0.0204895	0.037564	0.0746402	0.157736	0.000283093	0.000277554	0.000832661	0.000691396	0.000554111	0.00136307	0.263016	0.951059	0.00195519
N162051	0.000776398	0.000690131	0.000862664	0.000603865	0.000690131	0.0010352	0.000431332	0.0010352	0.000862664	0.00146653	0.00120773	0.000431332	0.000690131	0.000690131	0.00112146	0.00094893	0.00138026	0.00198413	0.001294	0.00301932	0.00319186	0.00301932	0.00215666	0.00310559	0.00465839	0.00284679	0.00534852	0.00888544	0.0114734	0.0110421	0.0213078	0.0452036	0.0901484	0.000986849	0.000725655	0.000604712	0.000723053	0.000362176	0.00201943	0.123469	0.98917	0.0124008
N162058	0.002106	0.00561601	0.003159	0.00351	0.0026325	0.004563	0.003159	0.004563	0.0036855	0.00508951	0.0033345	0.00351	0.0036855	0.003861	0.0033345	0.0033345	0.0040365	0.0036855	0.0047385	0.00649351	0.00666901	0.004914	0.00737101	0.00614251	0.00737101	0.00754651	0.00649351	0.00912601	0.0149175	0.014742	0.0156195	0.0289575	0.0236925	0.001627	0.00584894	0.00584894	0.00609288	0.00769613	0.00757276	0.0350632	0.996053	0.15009
N162059	0.000966702	0.00075188	0.00118153	0.00128894	0.00107411	0.00171858	0.000966702	0.00150376	0.00107411	0.00150376	0.00171858	0.00139635	0.00107411	0.00171858	0.00204082	0.000966702	0.000966702	0.00257787	0.00128894	0.00161117	0.00236305	0.00171858	0.00300752	0.00311493	0.00322234	0.00397422	0.00483351	0.00590763	0.00934479	0.00923738	0.0237379	0.046724	0.0773362	0.00183464	0.00179874	0.00209853	0.00194165	0.00209477	0.00279733	0.105435	0.991085	0.0155975
N162113	0.00352007	0.00350576	0.00280461	0.0034199	0.00277599	0.00373471	0.00366316	0.00386349	0.00313372	0.00422122	0.00404951	0.00402089	0.00477928	0.00402089	0.00456464	0.00410675	0.00409244	0.00609573	0.00475066	0.00693997	0.00692566	0.00622451	0.00778422	0.00735494	0.00925807	0.00831366	0.0101023	0.0109466	0.016241	0.0148387	0.0210059	0.0344423	0.0467482	0.00340228	0.00424545	0.00368561	0.0055086	0.00591434	0.00778993	0.0744499	0.992187	0.119168
N162170	0.00109778	0.00087822	0.00102459	0.00087822	0.000951405	0.00117096	0.0014637	0.00153689	0.000805035	0.00182963	0.001976	0.00226874	0.00234192	0.00175644	0.00161007	0.0014637	0.00248829	0.00270785	0.00219555	0.00322014	0.00365925	0.00453747	0.00658665	0.00534251	0.00702576	0.00658665	0.00900176	0.0128806	0.0140515	0.0171253	0.0278103	0.0507904	0.081089	0.00115956	0.00136425	0.000909501	0.00203904	0.00204271	0.00390826	0.12306	0.986144	0.0461987
N162237	0.00164787	0.00301162	0.00230133	0.00227292	0.00213086	0.00261386	0.00281274	0.00315368	0.00289797	0.00292639	0.00340938	0.00309685	0.0039492	0.00357985	0.00411967	0.00329574	0.00411967	0.00585277	0.00491519	0.00613689	0.00698923	0.00593801	0.00829616	0.00724494	0.00923374	0.00687559	0.00997244	0.0114783	0.0163082	0.0159957	0.0223599	0.0390658	0.0557434	0.0020207	0.00354767	0.00363982	0.00321359	0.00381725	0.00728585	0.0883109	0.990594	0.0250678
N162254	0.00140746	0.00152475	0.00140746	0.00140746	0.00134882	0.0014661	0.00152475	0.00140746	0.00152475	0.00193526	0.00175932	0.00158339	0.00205255	0.00170068	0.00258034	0.00246305	0.0025217	0.00375323	0.00269763	0.0050434	0.00533662	0.0039878	0.0065095	0.00615764	0.0075651	0.00738916	0.00844476	0.0116115	0.0190593	0.0162444	0.0251583	0.044159	0.0734225	0.00093467	0.000916383	0.00128294	0.00146096	0.00246979	0.00486041	0.112084	0.988077	0.0171771
N162263	0.00312324	0.00299831	0.00281092	0.00281092	0.00331064	0.00343557	0.00274845	0.00393529	0.00262352	0.00424761	0.00406022	0.00487226	0.00487226	0.00468486	0.00493472	0.00374789	0.00537198	0.00643388	0.00668374	0.00943219	0.00949466	0.00680867	0.0102442	0.00930726	0.0113061	0.0106815	0.0109314	0.0126804	0.0179899	0.0188019	0.0269224	0.0457243	0.0753951	0.00332255	0.00476997	0.00360657	0.00579619	0.00545821	0.0118841	0.137184	0.980289	0.0276566
N162281	0.0026154	0.00300772	0.00222309	0.00300772	0.00235386	0.00457696	0.00274617	0.00340003	0.00170001	0.00300772	0.00274617	0.00496927	0.00300772	0.0035308	0.00444619	0.00379234	0.00326926	0.00444619	0.00340003	0.00523081	0.00706159	0.00549235	0.00823852	0.00797698	0.00889238	0.0102001	0.0111155	0.0205309	0.025631	0.0255002	0.0430234	0.0809468	0.131163	0.00321158	0.00658374	0.00629749	0.00427835	0.00685766	0.00534196	0.280484	0.928423	0.0727685
N162365	0.00126532	0.000790826	0.00118624	0.000632661	0.000553578	0.000395413	0.000869909	0.0013444	0.000711744	0.00166074	0.00126532	0.00118624	0.00166074	0.00102807	0.00118624	0.000948992	0.00126532	0.00173982	0.0013444	0.00166074	0.00205615	0.00166074	0.00284698	0.00237248	0.00332147	0.00371688	0.00498221	0.00664294	0.0107552	0.0117833	0.0236457	0.0548043	0.124555	0.00083936	0.00105806	0.00141075	0.000702846	0.00176027	0.001963	0.180889	0.978638	0.0351808
N162430	0.00280112	0.00172377	0.00237018	0.00193924	0.00204697	0.0018315	0.00247791	0.0033398	0.00215471	0.00258565	0.00323206	0.00193924	0.00463262	0.00226244	0.00377074	0.0018315	0.00323206	0.00247791	0.00323206	0.00430942	0.00667959	0.00409395	0.00581771	0.00484809	0.00689507	0.00549451	0.00743374	0.0106658	0.013036	0.0132515	0.0241327	0.0374919	0.0880198	0.00206968	0.00304378	0.00372017	0.00320136	0.00337591	0.00614531	0.134966	0.986724	0.039968
N162497	0.00138889	0.00133333	0.00166667	0.00155556	0.00155556	0.000944444	0.00111111	0.00138889	0.00161111	0.0025	0.00233333	0.00261111	0.00311111	0.00244444	0.00388889	0.00311111	0.00244444	0.00483333	0.005	0.00605556	0.00755556	0.006	0.00866667	0.00672222	0.0108889	0.0101667	0.0123333	0.0174444	0.0242222	0.0227222	0.0356667	0.0601667	0.101278	0.00190901	0.00228759	0.00239157	0.00217578	0.00290625	0.00674064	0.185184	0.967774	0.0216773
N162546	0.000531256	0.000531256	0.000885426	0.00035417	0.000619798	0.00115105	0.00115105	0.000796883	0.000531256	0.000885426	0.000796883	0.00115105	0.0012396	0.00132814	0.00141668	0.00177085	0.00168231	0.00247919	0.00318753	0.00389587	0.00442713	0.00309899	0.00655215	0.00593235	0.00743758	0.00788029	0.0100053	0.0142554	0.0204533	0.0203648	0.0348858	0.0612715	0.0992562	0.000147885	0.000289983	0.000144991	0.000144471	0.00159204	0.00412992	0.158785	0.977359	0.00408958
N162559	0.00175801	0.00206825	0.00206825	0.0016546	0.00155119	0.00268873	0.00237849	0.00217166	0.00186143	0.00206825	0.0024819	0.00268873	0.00392968	0.00258532	0.00186143	0.00196484	0.00341262	0.00372285	0.00506722	0.00527404	0.00589452	0.00475698	0.00651499	0.00506722	0.00713547	0.0089969	0.00910031	0.011272	0.0172699	0.0155119	0.024819	0.0420889	0.090486	0.00173132	0.00305541	0.0015277	0.00439755	0.00440545	0.00466828	0.1451	0.983364	0.097769
N162579	0.0056852	0.0038342	0.00409863	0.00403252	0.00416474	0.00416474	0.00575131	0.00482581	0.0037681	0.00561909	0.0056852	0.00694123	0.00608184	0.00462749	0.00594963	0.00482581	0.00561909	0.00601573	0.0056852	0.00799894	0.00687512	0.00535466	0.00740398	0.00601573	0.00872612	0.00674291	0.00733787	0.00866001	0.0118993	0.0128909	0.0178489	0.0334501	0.0513651	0.0035966	0.00595052	0.00661169	0.00735658	0.00692982	0.00887518	0.083646	0.991694	0.0616499
N162599	0.00143016	0.0011918	0.00150961	0.0011918	0.000556174	0.00158907	0.0011918	0.0011918	0.00111235	0.00143016	0.00150961	0.00222469	0.00166852	0.00111235	0.00206579	0.00198633	0.00143016	0.00254251	0.00254251	0.0023836	0.00381376	0.00254251	0.00484666	0.00341649	0.00484666	0.00484666	0.00691244	0.00881932	0.0143811	0.0146194	0.0267758	0.0558557	0.105117	0.00162386	0.000979744	0.00134715	0.000976231	0.00183372	0.00228548	0.158287	0.981427	0.0186936
N162624	0.000969991	0.000909366	0.00103062	0.000879054	0.000727493	0.00081843	0.00106093	0.00121249	0.00103062	0.00112155	0.00163686	0.00187936	0.00212186	0.0012428	0.00169748	0.00193998	0.00154592	0.00245529	0.00242498	0.00369809	0.00412246	0.0034859	0.00536526	0.00454683	0.00618369	0.00539557	0.00721431	0.0096696	0.0137921	0.0140042	0.0210064	0.0362534	0.0553501	0.00082179	0.000890523	0.000678494	0.00114085	0.00135455	0.00279063	0.0756466	0.99426	0.00616067
N162684	0.0014869	0.00177285	0.00171566	0.00194441	0.00154409	0.00228754	0.00154409	0.0014869	0.00120096	0.00188722	0.00223036	0.00131534	0.00194441	0.00131534	0.00188722	0.00205879	0.00165847	0.00183004	0.00263068	0.00314537	0.00234473	0.00240192	0.00360288	0.00268786	0.00360288	0.00285943	0.00383164	0.00594762	0.00806359	0.0110946	0.0176141	0.040032	0.0977925	0.00124567	0.00276828	0.0024426	0.00243384	0.00308841	0.00215922	0.136016	0.988144	0.0392565
N162735	0.00102843	0.00102843	0.00108893	0.00114943	0.00108893	0.000786449	0.000907441	0.00145191	0.00114943	0.00187538	0.00133091	0.00163339	0.00175439	0.00163339	0.00205687	0.00193587	0.0015729	0.00235935	0.00266183	0.00471869	0.00272232	0.00399274	0.00477919	0.00441621	0.00598911	0.00659407	0.00943739	0.0134301	0.0174834	0.0194192	0.03049	0.0598306	0.113249	0.00173082	0.00179677	0.00169695	0.00218818	0.00269032	0.00333351	0.182553	0.974299	0.0135496
N162774	0.00317199	0.0035209	0.00222039	0.00263275	0.00275963	0.00272791	0.00291823	0.00304511	0.00253759	0.00348918	0.00345746	0.00355262	0.00294995	0.00250587	0.00390154	0.00329886	0.00298167	0.0044725	0.0039967	0.00602677	0.00612193	0.00517034	0.00580473	0.00593161	0.00729557	0.00681977	0.00792996	0.00954767	0.0125293	0.0133541	0.0211571	0.037366	0.068959	0.00218419	0.00398409	0.00408369	0.00496226	0.00382781	0.00586979	0.10577	0.990267	0.0383434
N162804	0.00186559	0.00210164	0.00188843	0.00172852	0.00163715	0.00206357	0.00194173	0.00222347	0.00193412	0.00227678	0.00226916	0.00228439	0.00242146	0.00206357	0.00247476	0.00220063	0.00242146	0.00281742	0.0028631	0.00370833	0.0040586	0.00342659	0.00478961	0.00392915	0.0058252	0.00486575	0.00637345	0.00833041	0.0124728	0.0129677	0.0231637	0.0461066	0.0872409	0.0013185	0.00246998	0.00277007	0.00281765	0.0027075	0.00377508	0.129186	0.987277	0.0349951
N162827	0.00108162	0.000582411	0.000998419	0.000915218	0.00108162	0.000998419	0.000832016	0.000998419	0.000582411	0.00133123	0.000998419	0.000748814	0.00183044	0.000915218	0.00183044	0.00166403	0.00124802	0.00208004	0.00191364	0.00224644	0.00341127	0.00266245	0.00332806	0.00307846	0.00424328	0.00474249	0.00599052	0.00898577	0.0131459	0.0143939	0.028871	0.0603212	0.127548	0.000927466	0.00116912	0.000909319	0.00129437	0.00181537	0.00293459	0.194546	0.974001	0.0729303
N162859	0.000203211	0.000711238	0.000101605	0.000304816	0.000609632	0.000304816	0.000304816	0.000304816	0.000406421	0.000101605	0.000508027	0.000203211	0.000711238	0.000406421	0.000812843	0.000609632	0.000812843	0.00111766	0.000914448	0.00264174	0.0018289	0.00223532	0.00325137	0.00365779	0.00396261	0.00467385	0.00589311	0.00985572	0.014428	0.0158504	0.0344442	0.0657387	0.127616	0	0.000315933	0.000315933	0.000314801	0.00047305	0.000930934	0.193829	0.972384	0.00234239
N162873	0.000602773	0.000602773	0	0	0.000200924	0.000401849	0.000401849	0	0.000401849	0.000602773	0.000803697	0.000200924	0.000401849	0.000602773	0.000602773	0.000401849	0.000803697	0.00120555	0.000602773	0.00200924	0.000602773	0.000803697	0.00200924	0.00241109	0.00361664	0.00200924	0.00421941	0.00381756	0.00783605	0.00884067	0.0202933	0.0379747	0.124171	0.000277751	0.000272317	0	0.000271341	0	0.00106988	0.164409	0.984326	0.000603136
N162946	0	0	0	0.000133191	0	0.000133191	0.000266383	0	0	0	0	0.000399574	0.000532765	0.000399574	0.000665956	0.000266383	0.000799148	0.000399574	0.000399574	0.000665956	0.000932339	0.00173149	0.0014651	0.00226425	0.00199787	0.00279702	0.00372936	0.00652637	0.00812467	0.0091902	0.0234417	0.0519446	0.112413	0	0.000182093	0	0.000181441	0	0.000536559	0.150141	0.985168	0.000133209
N162977	7.5188e-05	0.000225564	0.000225564	0.000150376	0.000225564	0.000225564	0.00037594	0.000150376	0.000676692	0.000451128	0.000827068	0.000902256	0.00112782	0.00135338	0.00172932	0.00112782	0.00210526	0.00330827	0.00315789	0.00593985	0.00721805	0.00706767	0.00917293	0.00857143	0.012782	0.0104511	0.0142105	0.0203759	0.0293233	0.0271429	0.0450376	0.0791729	0.139248	0.00030868	0.000302641	0	0.000452334	0.00211468	0.00401295	0.27378	0.934725	0.000827752
N163034	0.00382775	0.00358852	0.0027512	0.00311005	0.00287081	0.00287081	0.00490431	0.00299043	0.00394737	0.00263158	0.00502392	0.0041866	0.00394737	0.0041866	0.00490431	0.00382775	0.00490431	0.00562201	0.00574163	0.00633971	0.00861244	0.0062201	0.00885167	0.00574163	0.00933014	0.0076555	0.00992823	0.0116029	0.0145933	0.0131579	0.017823	0.0318182	0.0386364	0.00212522	0.00340959	0.00549323	0.00509606	0.0052943	0.00948861	0.0597717	0.994098	0.244928
N163035	0.00867725	0.00740741	0.00719577	0.00603175	0.00613757	0.00719577	0.00772487	0.00846561	0.00507937	0.00656085	0.00793651	0.00698413	0.00814815	0.00507937	0.00888889	0.00539683	0.00751323	0.00687831	0.00698413	0.00952381	0.00899471	0.00730159	0.00910053	0.00740741	0.00994709	0.00814815	0.00941799	0.0106878	0.0122751	0.00846561	0.0101587	0.015873	0.0162963	0.00657495	0.0100276	0.0107438	0.0121327	0.0100096	0.0112562	0.0269397	0.995193	0.13791
N163076	0.000483832	0.000806387	0.000967664	0.000403193	0.000725748	0.000725748	0.00112894	0.000967664	0.000483832	0.000806387	0.000645109	0.000725748	0.000887025	0.000564471	0.000887025	0.00120958	0.00120958	0.00112894	0.00129022	0.00193533	0.00185469	0.00161277	0.00201597	0.00161277	0.00177405	0.00161277	0.00346746	0.00427385	0.00725748	0.00725748	0.0167728	0.0395936	0.107814	0.000551578	0.000973415	0.00108157	0.00129323	0.000755742	0.000956093	0.14127	0.988044	0.00698318
N163121	0.000743218	0	0.000743218	0.000743218	0.000371609	0.00111483	0.00148644	0.000743218	0.000371609	0.00111483	0.00111483	0.00185805	0.000743218	0.00111483	0.00222965	0.00148644	0.00148644	0.00297287	0.00148644	0.00371609	0.00185805	0.00185805	0.00557414	0.00297287	0.00557414	0.00594575	0.00297287	0.00743218	0.0104051	0.0126347	0.0252694	0.0464511	0.0962467	0	0.00108744	0.000543719	0.00270885	0.00162823	0.00320426	0.137574	0.986391	0.0147043
N163157	0.00018498	0	0.00018498	0	0.000369959	0	0	0.00018498	0.000369959	0.000369959	0.000369959	0.000739919	0.00110988	0.000369959	0.000924898	0.000369959	0.000739919	0.00147984	0.0018498	0.00240474	0.00332963	0.00295967	0.00277469	0.00369959	0.00351461	0.00517943	0.00739919	0.0125786	0.0175731	0.0190529	0.0371809	0.0789863	0.163522	0	0	0.000318174	0	0.000317603	0.00125005	0.274776	0.946487	0.000555247
N163198	0.00145415	0.00148108	0.0014003	0.00125219	0.00110408	0.00145415	0.00160226	0.00150801	0.00130605	0.00184462	0.00189848	0.00224855	0.00214084	0.00179076	0.00223509	0.00203312	0.00216777	0.00309681	0.00289484	0.00386428	0.00492797	0.0035546	0.00549347	0.00495489	0.00624748	0.00537229	0.00771509	0.0102733	0.0160765	0.0155514	0.0272788	0.052942	0.092433	0.00112394	0.0016953	0.00197079	0.0017948	0.00245378	0.0042461	0.142122	0.983488	0.027053
N163284	0.00110723	0.00122378	0.00110723	0.00104895	0.00151515	0.00145688	0.00180653	0.000874126	0.000990676	0.0016317	0.0018648	0.00145688	0.00192308	0.000990676	0.00215618	0.00262238	0.00221445	0.00221445	0.00262238	0.00308858	0.00273893	0.00273893	0.00343823	0.0039627	0.0048951	0.00477855	0.00594406	0.0100233	0.0111888	0.0147436	0.0263403	0.0574009	0.118298	0.00111221	0.00163567	0.00181741	0.00217307	0.00199556	0.00232059	0.180211	0.9774	0.0220924
N163303	0.00244123	0.00325497	0.00153707	0.00235081	0.00180832	0.0022604	0.00207957	0.0022604	0.00316456	0.00262206	0.00262206	0.00207957	0.00180832	0.0022604	0.00316456	0.00189873	0.00262206	0.00253165	0.00207957	0.0039783	0.00415913	0.00244123	0.00388788	0.00415913	0.00515371	0.00334539	0.00533454	0.00632911	0.00958409	0.00913201	0.0122061	0.0235986	0.0326401	0.00133464	0.00190331	0.00237913	0.0023706	0.00201864	0.00443991	0.0419526	0.997914	0.0652685
N163353	0.00144161	0.000600673	0.00108121	0.000840942	0.00108121	0.00180202	0.00120135	0.00192215	0.00168188	0.000961076	0.00132148	0.00204229	0.00192215	0.00144161	0.00216242	0.00180202	0.00108121	0.00216242	0.00396444	0.00396444	0.00444498	0.00420471	0.00504565	0.00564632	0.00792888	0.00492552	0.00840942	0.0129745	0.0174195	0.0204229	0.0338779	0.0673955	0.118453	0.00104977	0.00185261	0.00144092	0.00164086	0.00328761	0.00404364	0.198281	0.968478	0.0119126
N163486	0.00125156	0.00160915	0.00116217	0.00169855	0.00134096	0.000893975	0.00116217	0.00187735	0.00160915	0.00107277	0.00178795	0.00178795	0.00178795	0.00205614	0.00187735	0.00187735	0.00196674	0.000983372	0.00160915	0.00312891	0.0033971	0.00303951	0.00446987	0.00429108	0.00509566	0.00429108	0.0070624	0.0114429	0.0132308	0.0143036	0.0311103	0.0641874	0.126319	0.00162214	0.0015904	0.00144582	0.00187282	0.00202051	0.00255616	0.199581	0.971349	0.155228
N170018	0.00333955	0.00357254	0.00256291	0.00318422	0.0036502	0.00411619	0.0036502	0.00427151	0.0027959	0.00372787	0.00403852	0.00388319	0.00434918	0.0027959	0.00372787	0.00287356	0.00442684	0.00590245	0.00333955	0.0047375	0.00380553	0.0047375	0.00442684	0.00419385	0.00629077	0.00442684	0.00605778	0.0073004	0.0111836	0.0118049	0.0231438	0.0468313	0.0956042	0.00336242	0.0038038	0.00469136	0.00467454	0.00544234	0.00498148	0.152482	0.982894	0.137153
N170874	0.00752991	0.00724842	0.00724842	0.00668543	0.00570021	0.00752991	0.00668543	0.00738916	0.00457424	0.0078114	0.00731879	0.00689655	0.00689655	0.0052076	0.00654469	0.00471499	0.00464462	0.00577058	0.00527797	0.00584096	0.00584096	0.00478536	0.00654469	0.00464462	0.00774103	0.00584096	0.00640394	0.00640394	0.0128783	0.0101337	0.0137931	0.0269529	0.0769177	0.00633885	0.00894935	0.0115596	0.0138713	0.00955366	0.00769134	0.132722	0.986367	0.114624
N170893	0.00492721	0.00507652	0.00418066	0.00582307	0.00432997	0.00515118	0.00470325	0.00410601	0.00410601	0.00552445	0.00410601	0.00470325	0.00552445	0.00388205	0.00462859	0.00447928	0.00350877	0.00537514	0.00462859	0.00679358	0.00589772	0.00544979	0.00612169	0.00664427	0.00731616	0.00671892	0.00604703	0.00783875	0.0100784	0.0111236	0.016872	0.0326241	0.0768197	0.00488545	0.00540394	0.00614084	0.00648596	0.00637502	0.00711725	0.123463	0.988423	0.0823189
NO120430	0.000771265	0.000881446	0.000605994	0.000661084	0.000495813	0.000605994	0.000936536	0.000661084	0.000771265	0.0011569	0.00104672	0.000881446	0.000716175	0.00104672	0.000936536	0.000440723	0.000771265	0.00121199	0.00110181	0.00137726	0.00143235	0.00126708	0.00258925	0.00126708	0.00209343	0.00247907	0.00308506	0.00347069	0.00639048	0.00721684	0.0149295	0.03658	0.0976201	0.000514465	0.00108085	0.000648512	0.000789785	0.00107891	0.000920071	0.124739	0.990662	0.0221817
NO120582	0.000891001	0.0013365	0.0001485	0.0004455	0.000891001	0.000742501	0.000594001	0.0001485	0.000297	0.000594001	0.001188	0.0004455	0.001782	0.000742501	0.001782	0.0013365	0.001782	0.0016335	0.0019305	0.0022275	0.003564	0.002079	0.0025245	0.002079	0.0043065	0.00504901	0.00653401	0.00816751	0.0144045	0.0144045	0.0298485	0.0573211	0.108257	0.000227376	0	0.00111464	0.00177702	0.000445054	0.00262752	0.158764	0.981334	0.00687783
NO120714	0.00207039	0.00181159	0.0015528	0.00207039	0.00181159	0.00258799	0.00207039	0.000776398	0.0015528	0.0015528	0.00310559	0.00284679	0.00258799	0.0015528	0.00310559	0.00258799	0.00258799	0.00232919	0.00414079	0.00517598	0.00621118	0.00439959	0.00465839	0.00646998	0.00854037	0.00776398	0.00957557	0.00776398	0.0170807	0.0139752	0.0274327	0.047619	0.0776398	0.00209649	0.00246656	0.00287765	0.00286734	0.00164142	0.00565289	0.120483	0.986753	0.0216766
NO120975	0.000877193	0.00037594	0.000626566	0.000626566	0.000501253	0.000877193	0.000501253	0.000501253	0.000501253	0.000501253	0.00112782	0.00213033	0.00112782	0.00100251	0.00238095	0.00175439	0.00175439	0.00313283	0.00438596	0.00238095	0.0037594	0.00350877	0.0047619	0.00438596	0.00626566	0.00576441	0.00776942	0.012406	0.0161654	0.0182957	0.0281955	0.0562657	0.0879699	0.000198662	0.000584324	0.000973874	0.00135854	0.00213868	0.00306094	0.133577	0.983943	0.00821198
NO121937	0.00476044	0.00675676	0.00460688	0.00429975	0.00476044	0.00752457	0.00506757	0.00629607	0.00460688	0.00522113	0.00660319	0.00522113	0.00721744	0.00506757	0.00568182	0.00460688	0.00476044	0.00583538	0.00414619	0.00429975	0.00644963	0.00353194	0.00429975	0.00476044	0.00476044	0.00445332	0.00506757	0.00383907	0.00552826	0.00583538	0.00936732	0.0181204	0.0241093	0.00387188	0.00803886	0.00826216	0.00801004	0.00713283	0.00767648	0.0342495	0.997599	0.0914992
NO121940	0.00351474	0.00453515	0.00306122	0.00238095	0.00226757	0.00408163	0.00396825	0.00328798	0.00283447	0.00408163	0.00385488	0.00283447	0.00430839	0.0031746	0.0031746	0.00362812	0.00408163	0.00430839	0.0047619	0.00419501	0.00487528	0.00464853	0.00725624	0.00578231	0.00657596	0.00782313	0.00600907	0.00793651	0.0102041	0.0105442	0.015873	0.0206349	0.0214286	0.00228174	0.00399482	0.00319586	0.00366206	0.00462568	0.00549323	0.0295041	0.997675	0.159085
TCGA-2A-A8VL	0.00147411	0.00128985	0.00147411	0.00239543	0.00110558	0.00239543	0.00165837	0.0020269	0.00257969	0.00221117	0.0020269	0.00350101	0.00313249	0.00276396	0.00165837	0.00165837	0.00276396	0.0046066	0.0046066	0.00405381	0.00755482	0.00773908	0.00939746	0.00939746	0.00995025	0.0130827	0.0119772	0.0213746	0.0340888	0.0427492	0.0801548	0.15386	0.225539	0.00218649	0.00428742	0.00321557	0.00427205	0.00909443	0.014739	0.640842	0.519899	0.0452156
TCGA-2A-A8VO	0.00455611	0.00442593	0.00442593	0.00312419	0.00325436	0.00195262	0.00455611	0.00429576	0.00377506	0.00312419	0.00429576	0.0061182	0.00429576	0.00416558	0.00624837	0.00442593	0.00351471	0.00794064	0.00494663	0.00846134	0.00950273	0.011195	0.0154908	0.011976	0.0132778	0.0118459	0.0190055	0.0242124	0.0361885	0.0343661	0.0585785	0.107915	0.15686	0.00546409	0.00989017	0.0119506	0.0061592	0.0127519	0.0210474	0.485113	0.72626	0.723656
TCGA-2A-A8VT	0.00239282	0.00299103	0.00199402	0.00299103	0.00319043	0.00319043	0.00358923	0.00398804	0.00259222	0.00319043	0.00418744	0.00358923	0.00279163	0.00338983	0.00518445	0.00358923	0.00638086	0.00618146	0.00638086	0.00817547	0.0125623	0.00677966	0.00737787	0.0141575	0.0109671	0.0121635	0.018345	0.0215354	0.0382851	0.0346959	0.064008	0.118445	0.170489	0.00690294	0.00738314	0.01169	0.0128742	0.0104407	0.0163165	0.513912	0.696637	0.876838
TCGA-2A-A8VV	0.00788118	0.00636557	0.00666869	0.00757805	0.00454683	0.0081843	0.00788118	0.00666869	0.00454683	0.00636557	0.00575932	0.010003	0.00666869	0.00969991	0.00727493	0.00939679	0.00666869	0.0103062	0.00636557	0.0106093	0.0115186	0.0109124	0.0154592	0.0136405	0.014853	0.017278	0.0166717	0.0203092	0.0254623	0.0294028	0.0436496	0.0897242	0.125493	0.0138829	0.0188464	0.0219875	0.0166923	0.0240383	0.028795	0.423467	0.784539	0.958003
TCGA-2A-A8VX	0.00534283	0.00356189	0.00474918	0.00534283	0.00445236	0.00474918	0.00504601	0.00326506	0.00445236	0.00237459	0.00356189	0.00534283	0.00563966	0.00474918	0.00356189	0.00593648	0.0062333	0.00831107	0.00653013	0.00801425	0.00949837	0.00653013	0.00920154	0.0127634	0.0178094	0.0145444	0.0210745	0.0317602	0.048976	0.0445236	0.0834075	0.146631	0.15702	0.00441597	0.00974152	0.00865913	0.0140206	0.00864359	0.0287045	0.559374	0.348948	0.729603
TCGA-2A-A8W1	0.0112423	0.00899382	0.0106802	0.0084317	0.00674536	0.0123665	0.0134907	0.00786959	0.0123665	0.0118044	0.00899382	0.0118044	0.0084317	0.00786959	0.0129286	0.00730748	0.0118044	0.0157392	0.0123665	0.00899382	0.019674	0.0129286	0.0252951	0.019674	0.0286678	0.0219224	0.0219224	0.0320405	0.0354132	0.0365374	0.0607083	0.0730748	0.0764474	0.0343682	0.0336958	0.049012	0.0427318	0.0428086	0.0661923	0.406991	0.296265	0.517104
TCGA-2A-A8W3	0.0037357	0.00420266	0.00350222	0.00303526	0.00350222	0.00420266	0.00233481	0.00350222	0.00607051	0.00466962	0.00233481	0.00466962	0.00537007	0.00420266	0.00677095	0.00700444	0.00583703	0.0074714	0.00817184	0.0133084	0.012608	0.0109736	0.012141	0.0119075	0.0175111	0.018912	0.024749	0.031053	0.0466962	0.0464628	0.0754144	0.128415	0.157366	0.00453714	0.0133451	0.0115658	0.00797836	0.0168735	0.0349537	0.585806	0.364173	0.346748
TCGA-2A-AAYF	0.00197726	0.00313066	0.00296589	0.00263635	0.00181249	0.00395452	0.00296589	0.00247158	0.00296589	0.00362498	0.00263635	0.00247158	0.00329544	0.00395452	0.00444884	0.00395452	0.00461361	0.00724996	0.00692042	0.00840336	0.0112045	0.0110397	0.015159	0.0140056	0.0181249	0.0156533	0.0201022	0.0250453	0.0430054	0.0451475	0.0629428	0.114681	0.142528	0.00882822	0.00432774	0.00649162	0.00431223	0.00809996	0.0175343	0.457141	0.700774	0.353636
TCGA-2A-AAYO	0.00324535	0.00443531	0.00421895	0.00443531	0.00367806	0.00508438	0.00475984	0.0064907	0.00454349	0.00530074	0.00659887	0.00594981	0.00778884	0.00594981	0.00832973	0.0064907	0.00713977	0.00941151	0.0102769	0.0103851	0.0161186	0.0106015	0.0155777	0.0164431	0.0216357	0.018174	0.0214193	0.0274773	0.0419732	0.0460839	0.0591735	0.0951969	0.10212	0.0082921	0.0166876	0.0158318	0.0191859	0.0252	0.0302596	0.394606	0.666316	0.185509
TCGA-2A-AAYU	0.0037043	0.0037043	0.00386536	0.00531487	0.00338219	0.00322113	0.00386536	0.00499275	0.00338219	0.00531487	0.0048317	0.00595909	0.00756966	0.00467064	0.00805283	0.00531487	0.00789177	0.00918022	0.00982445	0.0115961	0.0119182	0.0138509	0.0159446	0.0136898	0.02287	0.0169109	0.0241585	0.0301176	0.0402641	0.0441295	0.0618457	0.107264	0.142857	0.0038115	0.0124564	0.0149477	0.0117912	0.00683874	0.034869	0.539697	0.536046	0.476142
TCGA-4L-AA1F	0.0155918	0.0141743	0.0106308	0.0127569	0.00921332	0.0106308	0.0134656	0.0212615	0.0141743	0.0134656	0.0127569	0.0170092	0.0141743	0.0120482	0.0248051	0.00637845	0.0127569	0.0170092	0.00992204	0.0191354	0.0177179	0.0205528	0.0177179	0.0233877	0.0290574	0.0198441	0.0304748	0.0368533	0.0304748	0.0318923	0.0453579	0.060241	0.0489015	0.0491885	0.0569945	0.0350735	0.0349478	0.0612686	0.0775111	0.29553	0.222718	0.565567
TCGA-CH-5737	0.00116279	0.00581395	0.00232558	0.00697674	0.00581395	0.00232558	0.00465116	0.00116279	0.00697674	0.00348837	0.00930233	0.00465116	0.0104651	0.00348837	0.00697674	0.0127907	0.0104651	0.00348837	0.00697674	0.0127907	0.00581395	0.00930233	0.0209302	0.0162791	0.0174419	0.0162791	0.0162791	0.0290698	0.044186	0.0465116	0.0837209	0.147674	0.131395	0.00472057	0.0185128	0.0416538	0.0230581	0.0092398	0.0318209	0.510921	0.266764	0.949851
TCGA-CH-5738	0.0103687	0.00806452	0.00576037	0.00921659	0.00115207	0.0184332	0.00806452	0.014977	0.0138249	0.00921659	0.00806452	0.0103687	0.0138249	0.0172811	0.0103687	0.0103687	0.014977	0.0230415	0.0184332	0.0184332	0.0218894	0.00921659	0.0172811	0.016129	0.0138249	0.0195853	0.0172811	0.0276498	0.0299539	0.0357143	0.0380184	0.0714286	0.0794931	0.0362417	0.0355326	0.0414547	0.0472069	0.0354688	0.040717	0.399197	0.538048	0.898398
TCGA-CH-5739	0.00433839	0.00650759	0.00867679	0.00650759	0.00433839	0.00650759	0.0021692	0.00650759	0.00433839	0.00650759	0.0021692	0.00867679	0.00433839	0.0021692	0.010846	0.0130152	0.0021692	0.00433839	0.0195228	0.00650759	0.0151844	0.0130152	0.0151844	0.021692	0.0260304	0.0195228	0.0195228	0.0390456	0.0477223	0.0368764	0.0737527	0.114967	0.112798	0.00978731	0.0383833	0	0.00956141	0.047893	0.0377002	0.48747	0.309356	0.946739
TCGA-CH-5740	0.00294551	0.00515464	0.00441826	0.00147275	0.00368189	0.00147275	0.00368189	0.00441826	0.00220913	0.00294551	0.00294551	0.00810015	0.000736377	0.00736377	0.00515464	0.00220913	0.00368189	0.00662739	0.00589102	0.00736377	0.0095729	0.00810015	0.0132548	0.0110457	0.0095729	0.0154639	0.0139912	0.0243004	0.0309278	0.0243004	0.0736377	0.13623	0.217968	0.00676956	0.0110619	0.00221237	0.00881775	0.0132504	0	0.639753	0.568429	0.985411
TCGA-CH-5741	0.0141557	0.016178	0.0151668	0.0091001	0.0101112	0.0151668	0.0232558	0.0192113	0.00404449	0.00808898	0.0151668	0.0121335	0.016178	0.0202224	0.0171891	0.0212336	0.0222447	0.0171891	0.016178	0.0192113	0.0171891	0.0151668	0.0283114	0.0192113	0.0232558	0.0212336	0.0202224	0.016178	0.0232558	0.0242669	0.0202224	0.0192113	0.0313448	0.00519144	0.0712581	0.0458088	0.0355013	0.0254037	0.0999858	0.154145	0.770727	0.825066
TCGA-CH-5743	0.00972763	0.00680934	0.00875486	0.0136187	0.00583658	0.00680934	0.00680934	0.0107004	0.0107004	0.0126459	0.0126459	0.00486381	0.0077821	0.0077821	0.016537	0.00875486	0.0155642	0.0136187	0.00875486	0.0126459	0.020428	0.0145914	0.0243191	0.0184825	0.0233463	0.0194553	0.016537	0.0262646	0.0291829	0.0330739	0.0583658	0.077821	0.0729572	0.0284897	0.0186215	0.0232769	0.0417482	0.0325292	0.0502979	0.341098	0.613976	0.801793
TCGA-CH-5744	0.00481232	0.00384986	0.00192493	0.00577478	0.00384986	0.00481232	0.00577478	0.00769971	0.00384986	0.00192493	0.0105871	0.0105871	0.00192493	0.00673725	0.0105871	0.00577478	0.00866218	0.00769971	0.00481232	0.0163619	0.014437	0.0134745	0.0182868	0.014437	0.0182868	0.012512	0.0163619	0.0221367	0.0461983	0.0346487	0.0279115	0.0683349	0.0731473	0.00267212	0.00785952	0.015719	0.0182731	0.0235363	0.00514644	0.194514	0.926502	0.652913
TCGA-CH-5746	0.0078125	0.0214844	0.00585938	0.015625	0.00195312	0.00585938	0.015625	0.0078125	0.00390625	0.0136719	0.0117188	0.0273438	0.0117188	0.0078125	0.00976562	0.0117188	0.0273438	0.0175781	0.015625	0.0117188	0.0214844	0.0117188	0.0292969	0.0214844	0.0195312	0.0175781	0.0117188	0.0371094	0.0332031	0.03125	0.0332031	0.078125	0.0644531	0.0227843	0.0558461	0.0446769	0.0890335	0.100343	0.0767933	0.360081	0.305523	0.825307
TCGA-CH-5748	0.00529101	0.00529101	0.00604686	0.00377929	0.00302343	0.00529101	0.00529101	0.010582	0.00453515	0.00453515	0.00831444	0.00453515	0.0120937	0.00377929	0.00680272	0.00529101	0.00529101	0.00831444	0.00453515	0.00680272	0.0151172	0.0128496	0.0166289	0.0143613	0.0143613	0.0196523	0.0272109	0.0279667	0.0468632	0.0483749	0.0597128	0.130008	0.165533	0.00296394	0.0261536	0.0116238	0.0144777	0.0174044	0.0256882	0.621721	0.340669	0.981491
TCGA-CH-5750	0.00605694	0.00635978	0.00605694	0.00635978	0.00484555	0.00696548	0.00847971	0.00605694	0.00757117	0.00545124	0.00696548	0.00726832	0.00575409	0.00423985	0.00817686	0.00635978	0.00757117	0.0102968	0.0112053	0.00635978	0.011811	0.0124167	0.017868	0.013931	0.0193822	0.0154452	0.0148395	0.0266505	0.0436099	0.0366445	0.0523925	0.0781345	0.104785	0.00917509	0.0236134	0.0168667	0.019047	0.0202037	0.0364464	0.380082	0.768952	0.266836
TCGA-CH-5751	0.00984252	0.0019685	0.015748	0.0216535	0.0137795	0.011811	0.0137795	0.00590551	0.011811	0.00984252	0.015748	0.015748	0.0295276	0.015748	0.015748	0.019685	0.0137795	0.0177165	0.0177165	0.0334646	0.0216535	0.023622	0.0137795	0.015748	0.0255906	0.0216535	0.00590551	0.0177165	0.0393701	0.0255906	0.0334646	0.0570866	0.0629921	0.0964345	0.0827292	0.0472738	0.0471043	0.0707835	0.0464326	0.369465	0.35792	0.389556
TCGA-CH-5752	0.00954401	0.0116649	0.00742312	0.00530223	0.0180276	0.00636267	0.00848356	0.0159067	0.00848356	0.00954401	0.0127253	0.0148462	0.00636267	0.0137858	0.019088	0.00742312	0.0159067	0.0169671	0.019088	0.019088	0.0201485	0.0180276	0.0360551	0.0201485	0.0201485	0.0275716	0.0233298	0.028632	0.0445387	0.0360551	0.0434783	0.0593849	0.0509014	0.0503497	0.0308529	0.0246823	0.055336	0.049276	0.109094	0.289354	0.349636	0.637537
TCGA-CH-5753	0.0118812	0.0118812	0.0108911	0.00792079	0.00693069	0.00891089	0.0138614	0.0108911	0.00594059	0.00990099	0.0138614	0.00891089	0.00792079	0.0108911	0.0237624	0.00792079	0.0118812	0.0158416	0.0138614	0.0148515	0.0138614	0.0247525	0.0267327	0.019802	0.0366337	0.029703	0.0376238	0.0435644	0.0534653	0.0376238	0.0336634	0.0455446	0.0425743	0.00592949	0.0639482	0.0523213	0.0231705	0.0116061	0.0856504	0.244212	0.369158	0.556284
TCGA-CH-5754	0.0141044	0.0126939	0.0126939	0.00846262	0.00846262	0.0141044	0.00705219	0.0267983	0.0112835	0.0197461	0.00987306	0.0197461	0.0183357	0.0141044	0.0197461	0.0155148	0.00705219	0.0155148	0.0197461	0.0211566	0.0183357	0.00705219	0.0296192	0.0253879	0.0211566	0.022567	0.022567	0.0324401	0.0352609	0.0267983	0.0296192	0.0507757	0.0409027	0.0531532	0.0434276	0.0694842	0.103853	0.0780295	0.0682477	0.246069	0.390317	0.582541
TCGA-CH-5761	0.0132325	0.0094518	0.00756144	0.00378072	0.00567108	0.0094518	0.0094518	0.00567108	0.00378072	0.00756144	0.00567108	0.0094518	0.00756144	0.00756144	0.0094518	0.00189036	0.0094518	0.0132325	0.0094518	0.0170132	0.0094518	0.0113422	0.020794	0.020794	0.0378072	0.0189036	0.0340265	0.0283554	0.0434783	0.0491493	0.0699433	0.0982987	0.102079	0.0173928	0.0255787	0.0170524	0.00849566	0.00851093	0.050247	0.449794	0.449794	0.928646
TCGA-CH-5762	0.0175593	0.0122915	0.0140474	0.0158033	0.00790167	0.0149254	0.0175593	0.0219491	0.0114135	0.0140474	0.0184372	0.0193152	0.022827	0.0140474	0.0272169	0.0149254	0.0166813	0.0201932	0.0166813	0.023705	0.0122915	0.0166813	0.0219491	0.0254609	0.022827	0.0210711	0.0280948	0.0289728	0.0351185	0.0333626	0.0254609	0.0219491	0.0184372	0.0306172	0.108065	0.150091	0.0777675	0.089893	0.117936	0.123168	0.281526	0.842712
TCGA-CH-5763	0.0045403	0.00529701	0.00605373	0.0071888	0.00491865	0.00643208	0.00567537	0.0071888	0.00302686	0.00643208	0.00567537	0.00794552	0.00908059	0.00567537	0.00945895	0.00643208	0.00416194	0.00605373	0.00756716	0.00908059	0.0121075	0.00832387	0.0132425	0.00832387	0.0139992	0.0071888	0.0124858	0.0151343	0.0208097	0.0204313	0.0249716	0.0461597	0.0650776	0.00571282	0.00960179	0.00640119	0.0111619	0.0103833	0.0188618	0.13445	0.975547	0.214544
TCGA-CH-5764	0.0117845	0.013468	0.00673401	0.00505051	0.010101	0.00505051	0.00673401	0.013468	0.00841751	0.0151515	0.016835	0.00505051	0.016835	0.00505051	0.013468	0.016835	0.0151515	0.016835	0.00841751	0.0117845	0.0117845	0.0218855	0.020202	0.00841751	0.016835	0.0185185	0.020202	0.026936	0.0387205	0.0387205	0.037037	0.0622896	0.0858586	0.0162531	0.0239027	0.0478053	0.0635119	0.0715794	0.0782577	0.396971	0.677185	0.755219
TCGA-CH-5765	0.00532481	0.0106496	0.0106496	0.00532481	0.0106496	0.00958466	0.0117146	0.0127796	0.00745474	0.0127796	0.0191693	0.0117146	0.0106496	0.0117146	0.0138445	0.00958466	0.0159744	0.0191693	0.0170394	0.0212993	0.0266241	0.0159744	0.0266241	0.0255591	0.0415335	0.0244941	0.0394036	0.0415335	0.0468584	0.0415335	0.0404686	0.0457934	0.0244941	0.0130076	0.044636	0.0510125	0.0762445	0.0763815	0.112736	0.143277	0.392456	0.91747
TCGA-CH-5766	0.00345622	0.0126728	0.00691244	0.00806452	0.00806452	0.00691244	0.00115207	0.00691244	0.00230415	0.00806452	0.00806452	0.0126728	0.016129	0.00806452	0.00806452	0.0138249	0.00576037	0.0115207	0.00460829	0.0115207	0.0126728	0.0103687	0.0115207	0.0115207	0.00921659	0.0126728	0.0172811	0.0172811	0.0276498	0.031106	0.0403226	0.0829493	0.118664	0.0163442	0.0160244	0.0320489	0.0239505	0.0199946	0.0314785	0.403109	0.790564	0.869977
TCGA-CH-5767	0.00122249	0.00611247	0.00366748	0.00244499	0.00244499	0.00366748	0.00488998	0	0.00366748	0.0110024	0.00733496	0.00366748	0.00366748	0.00855746	0.00733496	0.00733496	0.00855746	0.00366748	0.0134474	0.00977995	0.00611247	0.00733496	0.0122249	0.00855746	0.0122249	0.0158924	0.0281174	0.0256724	0.0366748	0.0293399	0.0696822	0.117359	0.169927	0.0130473	0.025584	0.00852801	0.0169949	0.0212818	0.0125644	0.579023	0.570691	0.937102
TCGA-CH-5768	0.006	0.006	0.012	0.008	0.006	0.004	0.014	0.014	0.002	0.004	0.01	0.01	0.016	0.008	0.012	0.012	0.012	0.012	0.012	0.02	0.016	0.012	0.01	0.012	0.014	0.016	0.03	0.03	0.048	0.036	0.062	0.08	0.086	0.00951871	0.0186649	0.0186649	0	0.0372629	0.0641648	0.392038	0.437623	0.909274
TCGA-CH-5769	0.0202775	0.0192102	0.0138741	0.0106724	0.0170758	0.0245464	0.0170758	0.0128068	0.0138741	0.0192102	0.0170758	0.0256137	0.022412	0.018143	0.0192102	0.00853789	0.0256137	0.0234792	0.0192102	0.0213447	0.0245464	0.0192102	0.0288154	0.022412	0.0234792	0.0298826	0.0117396	0.022412	0.0288154	0.0138741	0.0320171	0.00853789	0.0170758	0.0528587	0.14807	0.074035	0.147539	0.0960728	0.0945328	0.115723	0.180817	0.813029
TCGA-EJ-5494	0.00596659	0.00686158	0.00447494	0.0071599	0.00775656	0.00656325	0.00745823	0.00894988	0.00984487	0.00865155	0.0140215	0.0107399	0.00775656	0.00924821	0.0071599	0.00686158	0.0128282	0.0125298	0.0107399	0.0143198	0.0184964	0.0143198	0.0173031	0.0170048	0.0220764	0.0193914	0.0214797	0.0241647	0.0319212	0.0292363	0.0360979	0.0522076	0.0680191	0.0136255	0.0222648	0.0222648	0.0144202	0.0322261	0.0426438	0.247963	0.85917	0.389857
TCGA-EJ-5495	0.0103488	0.0114987	0.0099655	0.00804906	0.00728248	0.0134151	0.0099655	0.00766577	0.0126485	0.0103488	0.0134151	0.0137984	0.0114987	0.0107321	0.0153315	0.0141817	0.00958222	0.0114987	0.014565	0.019931	0.0187811	0.0122652	0.0122652	0.014565	0.019931	0.0249138	0.0187811	0.0229973	0.0298965	0.0279801	0.0256803	0.0417785	0.0490609	0.0217024	0.0458291	0.0409188	0.0391413	0.0522821	0.0530517	0.204671	0.84107	0.411777
TCGA-EJ-5496	0.00513479	0.00417202	0.00353017	0.00449294	0.00385109	0.00513479	0.00609756	0.00481386	0.00513479	0.00449294	0.00513479	0.00577664	0.00609756	0.00577664	0.00770218	0.00545571	0.00898588	0.00706033	0.00898588	0.0118742	0.0147625	0.00994865	0.0160462	0.0131579	0.0179718	0.0157253	0.0234275	0.0314506	0.0458922	0.0481386	0.0580873	0.084724	0.0943517	0.00485127	0.01308	0.00713452	0.0177724	0.0130565	0.0327019	0.341526	0.743458	0.210466
TCGA-EJ-5497	0.00322826	0.00379795	0.00474744	0.00607672	0.00341815	0.00379795	0.00284846	0.00436764	0.00512723	0.00531713	0.00493733	0.0072161	0.0077858	0.00550703	0.00626662	0.00607672	0.00683631	0.0077858	0.00930498	0.0121534	0.0119635	0.0123433	0.0180403	0.012913	0.0214584	0.0153817	0.01861	0.0224079	0.0338017	0.0326624	0.0457653	0.0801367	0.0883023	0.00593311	0.00930723	0.00872553	0.0127516	0.0116132	0.0194259	0.264251	0.872312	0.233581
TCGA-EJ-5498	0.00526932	0.00409836	0.00214676	0.00273224	0.00273224	0.00331772	0.00351288	0.00351288	0.00429352	0.0029274	0.0029274	0.00448868	0.00370804	0.00370804	0.00644028	0.00312256	0.00526932	0.0058548	0.004879	0.00624512	0.0115144	0.00761124	0.0128806	0.0142467	0.0126854	0.0111241	0.018345	0.0197112	0.0267369	0.0284934	0.0435207	0.0735753	0.12256	0.00443278	0.00724341	0.00627762	0.00769861	0.00626636	0.0137547	0.296261	0.912842	0.219473
TCGA-EJ-5499	0.00514917	0.00605785	0.0039376	0.00333182	0.00363471	0.00469484	0.00757232	0.00530062	0.00469484	0.0062093	0.00605785	0.00605785	0.00832955	0.00560351	0.00878389	0.00666364	0.00651219	0.00908678	0.00969256	0.0136302	0.018325	0.0148417	0.0163562	0.0159019	0.0222626	0.0139331	0.019688	0.0243829	0.0390731	0.0334696	0.0543692	0.0876874	0.0846585	0.00644654	0.0179078	0.0100073	0.016794	0.0147211	0.0217278	0.287633	0.813501	0.69316
TCGA-EJ-5501	0.00446275	0.00343289	0.0030896	0.00446275	0.00274631	0.00686577	0.00514933	0.00549262	0.00377618	0.00480604	0.00652249	0.00411946	0.00652249	0.00549262	0.00686577	0.00686577	0.00652249	0.00858222	0.0120151	0.0123584	0.0147614	0.0151047	0.0161346	0.0164779	0.0212839	0.0175077	0.0157913	0.0254034	0.0435977	0.0435977	0.0545829	0.0937178	0.125987	0.00515866	0.0126443	0.0101155	0.0138589	0.015146	0.0335321	0.453341	0.696687	0.382035
TCGA-EJ-5502	0.00405858	0.00317628	0.00282336	0.00247044	0.00211752	0.00370566	0.00317628	0.00405858	0.00282336	0.00388212	0.00335274	0.00335274	0.00582319	0.00370566	0.00423504	0.00511735	0.00335274	0.00882301	0.00617611	0.00635257	0.00864655	0.00952885	0.00899947	0.00829363	0.0155285	0.00847009	0.0165873	0.0151756	0.0321158	0.0298218	0.0554085	0.0942298	0.153873	0.0049729	0.0102388	0.0112139	0.0121453	0.00973371	0.0196342	0.415344	0.830688	0.0686794
TCGA-EJ-5503	0.0046729	0.0046729	0.00534045	0.00267023	0.00400534	0.00267023	0.00400534	0.00400534	0.00233645	0.00300401	0.00500668	0.00333778	0.00200267	0.00367156	0.00600801	0.00500668	0.00367156	0.00801068	0.00834446	0.00567423	0.00901202	0.0076769	0.0113485	0.0100134	0.01502	0.0106809	0.0156876	0.021028	0.0300401	0.0337116	0.0504005	0.104139	0.150868	0.012216	0.0147409	0.00552784	0.0128521	0.0110358	0.0144786	0.406823	0.831647	0.670864
TCGA-EJ-5504	0.00849396	0.00914734	0.00718719	0.00816727	0.00588043	0.00751388	0.00816727	0.00914734	0.00522705	0.00914734	0.00914734	0.0107808	0.0107808	0.00914734	0.0140477	0.0107808	0.00947403	0.0140477	0.0120876	0.0114342	0.0169879	0.013721	0.0205815	0.0147011	0.0241751	0.017968	0.0261352	0.0362627	0.0444299	0.0375694	0.0552107	0.0761189	0.0924534	0.022265	0.0171516	0.0249478	0.0388413	0.0249031	0.0459448	0.431085	0.54533	0.893195
TCGA-EJ-5505	0.00277778	0.00246914	0.00216049	0.00216049	0.00246914	0.00154321	0.00185185	0.00308642	0.00308642	0.00216049	0.00277778	0.00246914	0.0037037	0.00246914	0.00246914	0.0037037	0.00524691	0.00802469	0.00524691	0.00833333	0.00771605	0.00895062	0.0151235	0.00679012	0.0145062	0.0154321	0.017284	0.0280864	0.0364198	0.0398148	0.0737654	0.119136	0.153395	0.00195846	0.0067205	0.00864065	0.00573978	0.00670845	0.0122588	0.466147	0.707193	0.235078
TCGA-EJ-5506	0.00520984	0.00752533	0.00492041	0.00607815	0.00520984	0.0081042	0.00636758	0.00665702	0.00492041	0.00607815	0.0089725	0.00694645	0.011288	0.00636758	0.0138929	0.00723589	0.00723589	0.0089725	0.0101302	0.0141823	0.0127352	0.0109986	0.0136035	0.0124457	0.0188133	0.0167873	0.0214182	0.0231548	0.0327062	0.0335745	0.0489146	0.0714906	0.0946454	0.0149562	0.0261849	0.0240901	0.026091	0.028229	0.0308627	0.334597	0.816539	0.329579
TCGA-EJ-5507	0.00552792	0.00580431	0.00304035	0.00276396	0.00469873	0.00414594	0.00718629	0.0063571	0.00248756	0.00359315	0.00608071	0.00939746	0.0063571	0.00442233	0.00801548	0.00718629	0.00525152	0.00442233	0.00884467	0.0102266	0.0113322	0.0116086	0.0140962	0.0129906	0.0190713	0.0157546	0.0185185	0.0281924	0.0472637	0.0403538	0.0726921	0.135987	0.150359	0.00969234	0.0137261	0.0105586	0.0136769	0.0200253	0.0217784	0.561133	0.395063	0.955689
TCGA-EJ-5508	0.00210637	0.000526593	0.000789889	0.00105319	0.00131648	0.00236967	0.000789889	0.00184308	0.000789889	0.00236967	0.00236967	0.00263296	0.00342285	0.00131648	0.00289626	0.00157978	0.00263296	0.00263296	0.00368615	0.00394945	0.007109	0.00421274	0.00605582	0.00895208	0.00947867	0.00658241	0.00974197	0.016851	0.0289626	0.0308057	0.0521327	0.108478	0.178515	0.00121891	0.00239013	0.00119507	0.00238156	0.00417522	0.00704279	0.39578	0.863945	0.093172
TCGA-EJ-5509	0.00384149	0.00525677	0.00444804	0.00323494	0.00384149	0.00465022	0.00707643	0.00545896	0.00384149	0.00465022	0.00465022	0.00525677	0.00727861	0.00525677	0.00505459	0.00444804	0.00525677	0.00828953	0.00788516	0.00748079	0.0105135	0.00566114	0.0119288	0.00849171	0.00808734	0.0113223	0.0117266	0.0179943	0.0240598	0.0254751	0.044076	0.0774363	0.131015	0.00261198	0.0128044	0.00819479	0.0127585	0.0112476	0.0135826	0.324232	0.902646	0.220231
TCGA-EJ-5510	0.00131381	0.000938438	0.00187688	0.000563063	0.000938438	0.000750751	0.0015015	0.000750751	0.00131381	0.000938438	0.00131381	0.00168919	0.00243994	0.00131381	0.00187688	0.00168919	0.00225225	0.00319069	0.00431682	0.0045045	0.00638138	0.00563063	0.00807057	0.00563063	0.0116366	0.0076952	0.0133258	0.0198949	0.0339715	0.0349099	0.0636261	0.123874	0.176802	0	0.000931701	0.00326096	0.000928361	0.00139504	0.00457561	0.428707	0.810539	0.18372
TCGA-EJ-5511	0.00801068	0.00756564	0.00801068	0.00445038	0.00489542	0.00756564	0.00801068	0.00934579	0.00845572	0.00623053	0.00890076	0.0106809	0.00979083	0.00979083	0.0133511	0.00534045	0.00979083	0.012016	0.0142412	0.0106809	0.0182466	0.0151313	0.0182466	0.0289275	0.0222519	0.023142	0.0244771	0.0329328	0.0396084	0.0387183	0.047174	0.0814419	0.103249	0.00860267	0.0274116	0.0210859	0.0336164	0.0442009	0.0497055	0.477906	0.514985	0.682475
TCGA-EJ-5512	0.00681481	0.00592593	0.008	0.00859259	0.00533333	0.00711111	0.00948148	0.0121481	0.00888889	0.0082963	0.0077037	0.00948148	0.00414815	0.00740741	0.010963	0.00918519	0.0082963	0.0118519	0.00711111	0.0151111	0.0174815	0.0171852	0.0183704	0.0180741	0.0171852	0.0139259	0.0231111	0.0257778	0.0331852	0.034963	0.0402963	0.0794074	0.088	0.00853806	0.0203296	0.0239172	0.0285977	0.0298428	0.0516814	0.346976	0.755869	0.25658
TCGA-EJ-5514	0.00814402	0.00985855	0.00557222	0.0141449	0.00771539	0.0115731	0.00985855	0.0111444	0.0111444	0.00942992	0.00900129	0.0124303	0.0137162	0.0137162	0.0141449	0.0115731	0.0115731	0.0158594	0.0124303	0.0167167	0.0175739	0.0154308	0.0197171	0.0141449	0.0188598	0.0184312	0.0214316	0.021003	0.0295757	0.0188598	0.0334333	0.037291	0.079297	0.0272846	0.0321009	0.0303175	0.0408708	0.0427244	0.0455429	0.322314	0.825822	0.53944
TCGA-EJ-5515	0.00315236	0.00210158	0.0033275	0.00367776	0.00245184	0.00385289	0.00262697	0.00472855	0.00367776	0.00367776	0.00437828	0.00542907	0.0056042	0.00437828	0.00595447	0.00542907	0.00490368	0.00665499	0.00542907	0.0061296	0.0089317	0.00735552	0.0103327	0.010683	0.0122592	0.0103327	0.0115587	0.0166375	0.0288967	0.0283713	0.0534151	0.091944	0.139054	0.00319829	0.00716734	0.00716734	0.00580259	0.00894311	0.0101197	0.347473	0.877874	0.14281
TCGA-EJ-5516	0.0032316	0.00502693	0.00179533	0.00179533	0.00610413	0.00143627	0.005386	0.00574506	0.0032316	0.00574506	0.00394973	0.00394973	0.00682226	0.005386	0.0043088	0.00394973	0.005386	0.00789946	0.00718133	0.0129264	0.010772	0.00933573	0.0100539	0.0125673	0.0150808	0.0179533	0.0190305	0.0290844	0.0369838	0.0337522	0.0714542	0.117774	0.164811	0.00882196	0.00864935	0.0123562	0.00492477	0.00616702	0.0291272	0.554066	0.601143	0.593473
TCGA-EJ-5517	0.00402361	0.00321888	0.00456009	0.00241416	0.00563305	0.00429185	0.00429185	0.00321888	0.00241416	0.00321888	0.00563305	0.00536481	0.00724249	0.00831545	0.00804721	0.00563305	0.00429185	0.00616953	0.00831545	0.0109979	0.00992489	0.0142167	0.0131438	0.0128755	0.0160944	0.0190451	0.0209227	0.0249464	0.0402361	0.041309	0.0579399	0.103809	0.133852	0.00282586	0.00738819	0.00831171	0.0101223	0.0110624	0.0281198	0.450206	0.712751	0.36419
TCGA-EJ-5518	0.00331263	0.00455487	0.00289855	0.00248447	0.00124224	0.00207039	0.00207039	0.00289855	0.000828157	0.00455487	0.00414079	0.00372671	0.00289855	0.00331263	0.00414079	0.00331263	0.00455487	0.00455487	0.00331263	0.00621118	0.00621118	0.00745342	0.00455487	0.0057971	0.0057971	0.00910973	0.0115942	0.0219462	0.0306418	0.0347826	0.0467909	0.0985507	0.161905	0.00204094	0.00800401	0.00700351	0.00498457	0.00599224	0.0137578	0.382171	0.87088	0.254419
TCGA-EJ-5519	0.00803023	0.00826641	0.00732168	0.00897496	0.0085026	0.00779405	0.0125177	0.0118092	0.00779405	0.00803023	0.0106282	0.00968351	0.0099197	0.0106282	0.0108644	0.0132263	0.011573	0.0172414	0.0144072	0.0188947	0.0174776	0.0160605	0.0198394	0.016769	0.021965	0.0214927	0.0214927	0.0311762	0.0401512	0.0389702	0.0493623	0.0793576	0.0791214	0.011247	0.039207	0.0269548	0.0244165	0.0525899	0.0722049	0.400979	0.473993	0.834958
TCGA-EJ-5521	0.00652884	0.00580341	0.00580341	0.00471527	0.00507798	0.00906783	0.00761697	0.00616612	0.00507798	0.00689155	0.00943054	0.00906783	0.00652884	0.00725426	0.00797969	0.0105187	0.0083424	0.0083424	0.00979325	0.0137831	0.0119695	0.012695	0.0130577	0.012695	0.0210374	0.0170475	0.0155967	0.0221255	0.0286543	0.0344577	0.0424374	0.0830613	0.106275	0.0106619	0.0130666	0.01568	0.0195297	0.0339123	0.0231014	0.374019	0.792717	0.660351
TCGA-EJ-5522	0.0018622	0.00206911	0.00248293	0.00227602	0.00206911	0.00227602	0.0018622	0.00310366	0.00165529	0.00455204	0.00310366	0.00413822	0.00227602	0.00310366	0.00351748	0.00331057	0.00268984	0.00455204	0.00558659	0.0057935	0.00620732	0.00682806	0.00558659	0.0095179	0.00931099	0.0109663	0.0109663	0.0144838	0.018622	0.0227602	0.0413822	0.06497	0.0751086	0.00272732	0.00229197	0.00267396	0.00418688	0.00495702	0.00712874	0.135465	0.975123	0.26142
TCGA-EJ-5524	0.00254323	0.00356053	0.00305188	0.00534079	0.00228891	0.00330621	0.00534079	0.00534079	0.00356053	0.00661241	0.0076297	0.00610376	0.00788403	0.00483215	0.00966429	0.00737538	0.00610376	0.0109359	0.0134791	0.0152594	0.0144964	0.0142421	0.0193286	0.0134791	0.0221261	0.0200916	0.0246694	0.0307731	0.043235	0.0419634	0.051119	0.0890132	0.104018	0.00801422	0.0117861	0.016697	0.0156585	0.011765	0.0385879	0.392442	0.703326	0.369226
TCGA-EJ-5525	0.00676869	0.00412007	0.0064744	0.0064744	0.00470865	0.00529723	0.00559152	0.00706298	0.00618011	0.00882872	0.00824014	0.0094173	0.00882872	0.00618011	0.00794585	0.00853443	0.00882872	0.0103002	0.00853443	0.0164803	0.0129488	0.0138317	0.0226604	0.0188346	0.0244261	0.0309005	0.0258976	0.0403178	0.0497351	0.0417893	0.0609182	0.0794585	0.0573867	0.00684385	0.0268398	0.0161039	0.0280807	0.0241125	0.0395432	0.25565	0.608317	0.868144
TCGA-EJ-5526	0.00389636	0.00584454	0.00272745	0.00428599	0.0033119	0.00448081	0.00584454	0.00409117	0.00487045	0.00487045	0.00584454	0.00623417	0.00720826	0.00623417	0.00798753	0.00623417	0.00623417	0.00837717	0.00896162	0.00935126	0.0134424	0.00954607	0.0118839	0.0148062	0.0165595	0.0146113	0.019287	0.0253263	0.0383791	0.0432496	0.0767582	0.118449	0.141438	0.00819649	0.0109583	0.0146111	0.0167426	0.0153142	0.0265496	0.518147	0.555973	0.0634854
TCGA-EJ-5527	0.0049505	0.00456969	0.00380807	0.00266565	0.00456969	0.0053313	0.00266565	0.0049505	0.0053313	0.00456969	0.00380807	0.00875857	0.00647372	0.00456969	0.00647372	0.00685453	0.00571211	0.00723534	0.00380807	0.0102818	0.0144707	0.00990099	0.0148515	0.0156131	0.0175171	0.0144707	0.0159939	0.0255141	0.0403656	0.0403656	0.0616908	0.104722	0.138995	0.00974912	0.0191167	0.00819288	0.0108847	0.0190824	0.0254825	0.486902	0.654983	0.545303
TCGA-EJ-5530	0.00782779	0.00726866	0.00391389	0.00475259	0.00559128	0.00447302	0.00754822	0.00726866	0.00531171	0.0069891	0.00810735	0.00531171	0.00754822	0.00503215	0.0069891	0.00531171	0.00754822	0.00978474	0.0069891	0.0142578	0.0156556	0.0123008	0.0170534	0.0128599	0.0192899	0.0145373	0.0195695	0.0229242	0.0369024	0.0243221	0.0438915	0.0863852	0.0972882	0.00937892	0.010115	0.00735633	0.0192411	0.0211115	0.0234826	0.312617	0.841732	0.817011
TCGA-EJ-5531	0.0094399	0.00503461	0.00440529	0.00566394	0.00566394	0.00566394	0.00377596	0.00629327	0.00692259	0.00818125	0.00188798	0.00440529	0.00692259	0.0113279	0.00629327	0.00377596	0.00692259	0.00692259	0.0100692	0.00755192	0.0113279	0.00818125	0.0163625	0.00818125	0.0100692	0.0138452	0.0188798	0.0144745	0.0213971	0.0245437	0.0377596	0.0566394	0.092511	0.00822511	0.0161284	0.0145155	0.0128564	0.0177094	0.0205938	0.231617	0.939073	0.270925
TCGA-EJ-5532	0.00221779	0.00487913	0.00421379	0.00243957	0.00177423	0.00487913	0.00465735	0.00421379	0.00266134	0.00377024	0.0062098	0.00377024	0.00377024	0.00443557	0.0062098	0.00554447	0.00532269	0.00776225	0.00776225	0.00687514	0.00776225	0.00842759	0.011976	0.0130849	0.0161898	0.0113107	0.0166334	0.0246174	0.033045	0.0308272	0.05611	0.0935906	0.140608	0.00529579	0.00973532	0.0116824	0.00840703	0.0103657	0.0146619	0.401986	0.820458	0.901075
TCGA-EJ-5542	0.00631396	0.00805574	0.00609623	0.00500762	0.0047899	0.0047899	0.00718485	0.00348356	0.00370128	0.00457218	0.00631396	0.0067494	0.00587851	0.0067494	0.0095798	0.00544307	0.00805574	0.010233	0.00936207	0.0119747	0.0132811	0.0124102	0.0185064	0.0174178	0.023514	0.0189419	0.015676	0.0285217	0.0396255	0.0315698	0.0559547	0.0883954	0.104507	0.0100982	0.0123758	0.0206263	0.0213744	0.0238835	0.0348459	0.386888	0.735087	0.355306
TCGA-EJ-7115	0.000315657	0.000315657	0	0.000315657	0.00094697	0.000631313	0.000315657	0	0.000631313	0.00189394	0.0022096	0.000315657	0.00157828	0.000631313	0.000631313	0.00126263	0.000315657	0.00094697	0.000315657	0.0022096	0.00599747	0.00284091	0.00410354	0.00505051	0.0072601	0.00694444	0.00568182	0.0129419	0.0148359	0.0186237	0.0457702	0.0880682	0.196654	0.000594259	0	0	0.000580543	0.00174476	0.00171679	0.354605	0.913549	0.00955979
TCGA-EJ-7123	0.00273349	0.00364465	0.00501139	0	0.00546697	0.00364465	0.00182232	0.00318907	0.00501139	0.00318907	0.00455581	0.00592255	0.00364465	0.00318907	0.00318907	0.00364465	0.00501139	0.00501139	0.00728929	0.00774487	0.00728929	0.00911162	0.00911162	0.0100228	0.0113895	0.0109339	0.0159453	0.0236902	0.0305239	0.0246014	0.0482916	0.0851936	0.147608	0.00352175	0.00345284	0.00460379	0.00344047	0.0068933	0.00791327	0.364304	0.878152	0.0319536
TCGA-EJ-7314	0.00699068	0.00699068	0.00665779	0.00649134	0.00715712	0.00832224	0.00848868	0.00765646	0.00798935	0.00882157	0.00982024	0.010486	0.0108189	0.00815579	0.0126498	0.00749001	0.0103196	0.0126498	0.00765646	0.0138149	0.0136485	0.0129827	0.0106525	0.0139814	0.0156458	0.0136485	0.0184754	0.020972	0.0331225	0.0329561	0.0476032	0.0822237	0.115346	0.0220795	0.0203355	0.0275514	0.026799	0.0347048	0.0270611	0.44411	0.72288	0.340938
TCGA-EJ-7315	0.0031428	0.00294638	0.00333923	0.0031428	0.00216068	0.00333923	0.00373208	0.00373208	0.00255353	0.00274995	0.00274995	0.00333923	0.0023571	0.0031428	0.00491063	0.0047142	0.0047142	0.00687488	0.0070713	0.00982125	0.00923198	0.0102141	0.0139462	0.0102141	0.0178747	0.0137498	0.0186604	0.0273031	0.0473384	0.04066	0.0630524	0.114712	0.13848	0.00510852	0.00313035	0.00813892	0.00998122	0.0112491	0.0129135	0.431197	0.732729	0.130951
TCGA-EJ-7317	0.0016158	0.00125673	0.0010772	0.002693	0.000718133	0.0016158	0.0010772	0.00287253	0.0016158	0.00251346	0.00179533	0.0032316	0.00197487	0.00305206	0.00287253	0.00197487	0.00251346	0.0032316	0.002693	0.0059246	0.00466786	0.0048474	0.00843806	0.00610413	0.00933573	0.00718133	0.00897666	0.0174147	0.0262118	0.0258528	0.0554758	0.108438	0.183124	0.00125105	0.00245314	0.00245314	0.00244435	0.00571372	0.00763004	0.407412	0.858761	0.0816995
TCGA-EJ-7321	0.00302697	0.0038525	0.00247661	0.00275179	0.00192625	0.00220143	0.00247661	0.00247661	0.00467804	0.0038525	0.00357733	0.00247661	0.0038525	0.00330215	0.0052284	0.00357733	0.00412768	0.0052284	0.00605394	0.00963126	0.0110072	0.00715465	0.0121079	0.00935608	0.0156852	0.0156852	0.0198129	0.0275179	0.0473308	0.0434783	0.0742983	0.136764	0.162631	0.00744683	0.00912641	0.00273792	0.00363748	0.00364401	0.0188244	0.526927	0.582205	0.223174
TCGA-EJ-7327	0.00453738	0.003551	0.00276189	0.00434011	0.00315644	0.00493194	0.00335372	0.00453738	0.00118367	0.00512922	0.00394555	0.00453738	0.00493194	0.00394555	0.00591833	0.00512922	0.00414283	0.00532649	0.00651016	0.00572105	0.0108503	0.00749655	0.00868021	0.00868021	0.0134149	0.00946932	0.0136122	0.0193332	0.0311699	0.0327481	0.0570132	0.103176	0.144999	0.00601987	0.00590209	0.00643864	0.0106926	0.00856945	0.00895909	0.385268	0.839203	0.0654469
TCGA-EJ-7328	0.00433925	0.00710059	0.00315582	0.00749507	0.00394477	0.00512821	0.00907298	0.00591716	0.00591716	0.00433925	0.0106509	0.0106509	0.00710059	0.00749507	0.00788955	0.00591716	0.0086785	0.0126233	0.0106509	0.0110454	0.0138067	0.0161736	0.0205128	0.0161736	0.0224852	0.0205128	0.0232742	0.0295858	0.0422091	0.0485207	0.0733728	0.101381	0.121893	0.00877661	0.0103259	0.0154888	0.0240073	0.0223326	0.0490202	0.519513	0.415274	0.200142
TCGA-EJ-7330	0.00380228	0.00464723	0.00401352	0.00401352	0.00274609	0.00232362	0.00337981	0.00274609	0.00359104	0.00401352	0.00528095	0.00506971	0.00591466	0.00464723	0.00422476	0.00443599	0.00506971	0.00633714	0.00633714	0.00739332	0.0111956	0.00971694	0.0152091	0.0152091	0.0156316	0.0145754	0.0202788	0.0291508	0.0386565	0.039079	0.0623152	0.0956907	0.111745	0.00483758	0.0135512	0.010841	0.0135026	0.00811614	0.0192996	0.35016	0.797624	0.271931
TCGA-EJ-7331	0.00383037	0.00492476	0.00355677	0.00300958	0.00273598	0.000820793	0.00246238	0.00246238	0.00246238	0.00328317	0.00273598	0.00437756	0.00547196	0.00492476	0.00629275	0.00656635	0.00410397	0.00629275	0.00601915	0.0103967	0.0109439	0.00766074	0.0109439	0.00984952	0.0123119	0.0161423	0.0188782	0.025171	0.0372093	0.0317373	0.0708618	0.126129	0.191518	0.00628817	0.00880734	0.00880734	0.00965334	0.0140665	0.0198964	0.60229	0.585082	0.359714
TCGA-EJ-7782	0.00262536	0.00315043	0.00183775	0.00157522	0.00131268	0.00183775	0.0028879	0.00341297	0.00157522	0.00420058	0.0028879	0.00315043	0.00315043	0.00131268	0.00315043	0.00420058	0.00472565	0.00472565	0.00630087	0.00472565	0.00866369	0.00971384	0.00971384	0.00866369	0.00971384	0.00892623	0.0157522	0.0246784	0.0385928	0.0370176	0.0706222	0.135731	0.208979	0.00390665	0.00689439	0.00459626	0.00305319	0.00611735	0.00827652	0.595702	0.61965	0.150753
TCGA-EJ-7783	0.00190557	0.00592844	0.00338768	0.0042346	0.00275249	0.00402287	0.00402287	0.0042346	0.00275249	0.00338768	0.00486979	0.00592844	0.00381114	0.00359941	0.00592844	0.0042346	0.00444633	0.00868092	0.00486979	0.00846919	0.010163	0.00910438	0.00846919	0.00846919	0.0148211	0.00889265	0.0131272	0.0194791	0.0296422	0.0249841	0.0499682	0.0923142	0.144611	0.00464816	0.00797512	0.00797512	0.010217	0.0130785	0.0117498	0.380095	0.856467	0.507615
TCGA-EJ-7784	0.000561167	0.000561167	0.00112233	0.00182379	0.00154321	0.000561167	0.00224467	0.00126263	0.000841751	0.00126263	0.00210438	0.00154321	0.00126263	0.00196409	0.00280584	0.00224467	0.00196409	0.00294613	0.00322671	0.003367	0.00434905	0.00266554	0.00476992	0.00547138	0.00603255	0.00743547	0.00729517	0.0112233	0.0169753	0.0217452	0.0363356	0.0662177	0.109428	0.00120871	0.00142207	0.000948049	0.00165314	0.00165611	0.00325912	0.180604	0.972022	0.217125
TCGA-EJ-7785	0.00215827	0.00215827	0.0028777	0.00263789	0.00239808	0.00191847	0.00311751	0.00143885	0.00311751	0.00239808	0.00407674	0.00335731	0.00503597	0.0028777	0.00263789	0.00503597	0.0028777	0.00647482	0.00551559	0.00503597	0.00815348	0.0088729	0.0088729	0.0122302	0.0139089	0.0107914	0.0158273	0.022542	0.0306954	0.0330935	0.0635492	0.12518	0.185612	0.00500685	0.0070127	0.0070127	0.00768631	0.0063001	0.0103319	0.53026	0.701533	0.185438
TCGA-EJ-7786	0.00234962	0.00281955	0.00117481	0.00234962	0.00281955	0.00258459	0.00305451	0.00258459	0.00140977	0.00352444	0.00281955	0.00493421	0.00352444	0.00164474	0.00281955	0.00328947	0.00422932	0.00422932	0.00540414	0.00728383	0.00704887	0.00822368	0.0133929	0.00704887	0.0133929	0.00986842	0.018562	0.024906	0.0401786	0.0361842	0.0697838	0.117951	0.187735	0.00143642	0.00422494	0.00281663	0.00420979	0.00913761	0.011066	0.549641	0.670025	0.0897997
TCGA-EJ-7788	0.00584795	0.00563136	0.00519818	0.0071475	0.00584795	0.00433182	0.00433182	0.00584795	0.00606454	0.00671432	0.00606454	0.00736409	0.00606454	0.00584795	0.00974659	0.00779727	0.00909682	0.0108295	0.0110461	0.0168941	0.0171107	0.0129955	0.015378	0.0162443	0.0203595	0.0205761	0.0236084	0.0314057	0.0485164	0.0446177	0.0781893	0.12324	0.107646	0.0106819	0.0257063	0.0314188	0.0227681	0.022809	0.0289894	0.462269	0.293918	0.912055
TCGA-EJ-7789	0.00372142	0.00372142	0.00239234	0.00345561	0.00212653	0.00398724	0.00531632	0.00451887	0.00318979	0.00292398	0.00398724	0.00611377	0.00611377	0.00505051	0.00478469	0.00425306	0.00505051	0.00691122	0.00558214	0.0082403	0.00877193	0.00717703	0.0127592	0.0108985	0.0183413	0.0170122	0.0204678	0.0305688	0.0473153	0.0454545	0.0712387	0.124934	0.132642	0.00761276	0.0102627	0.00746381	0.00836668	0.0111756	0.0100801	0.454814	0.617964	0.481101
TCGA-EJ-7791	0.00482975	0.00265636	0.00241488	0.00265636	0.00338083	0.00362231	0.00410529	0.00603719	0.00555421	0.00555421	0.00555421	0.00507124	0.00700314	0.00603719	0.00627868	0.00676165	0.00748611	0.00748611	0.00917653	0.00917653	0.0108669	0.0132818	0.0144893	0.0164212	0.0212509	0.0166626	0.0200435	0.0268051	0.0446752	0.0427433	0.0731707	0.114465	0.129437	0.0143099	0.0149652	0.0159006	0.0149116	0.0112038	0.0284792	0.489769	0.540939	0.720466
TCGA-EJ-7792	0.00452034	0.0025113	0.00276243	0.00175791	0.00301356	0.00477147	0.00401808	0.00376695	0.00376695	0.00301356	0.00351582	0.0050226	0.00426921	0.00602712	0.00627825	0.00552486	0.00351582	0.00678051	0.00878955	0.0105475	0.00904068	0.0113009	0.0120542	0.0120542	0.0163235	0.0150678	0.0168257	0.0258664	0.0349071	0.038674	0.0577599	0.101457	0.143144	0.00480616	0.00706819	0.010995	0.0148682	0.00705551	0.0146562	0.437324	0.769537	0.215536
TCGA-EJ-7793	0.000935016	0.0021817	0.00187003	0.00233754	0.00187003	0.0021817	0.00155836	0.00187003	0.00155836	0.00264921	0.00155836	0.00233754	0.0017142	0.00296089	0.00155836	0.00264921	0.00405174	0.00405174	0.0038959	0.0038959	0.00701262	0.00592177	0.00794764	0.00670095	0.010441	0.0077918	0.0129344	0.0158953	0.0258688	0.0233754	0.0430108	0.0707496	0.0891382	0.00240366	0.00206205	0.00117832	0.00264171	0.00411671	0.00665475	0.164612	0.966662	0.0512106
TCGA-EJ-7794	0.0027735	0.0027735	0.00246533	0.00154083	0.00154083	0.00338983	0.00154083	0.00215716	0.00246533	0.0046225	0.0027735	0.00246533	0.00523883	0.0046225	0.00647149	0.003698	0.00647149	0.00677966	0.00862866	0.0101695	0.0132512	0.00708783	0.0104777	0.011094	0.0141757	0.0114022	0.0194145	0.0271186	0.0382126	0.0431433	0.0702619	0.106626	0.170416	0.00301789	0.00394513	0.00591769	0.00786197	0.0167367	0.0135622	0.532831	0.674469	0.0272137
TCGA-EJ-7797	0.00637472	0.00803769	0.00859202	0.0058204	0.00692905	0.00859202	0.00831486	0.0110865	0.00609756	0.00748337	0.00970067	0.00831486	0.0094235	0.00886918	0.0116408	0.00970067	0.00803769	0.0124723	0.0149667	0.0157982	0.0213415	0.0121951	0.0213415	0.0174612	0.0238359	0.0221729	0.0243902	0.0340909	0.0401885	0.0407428	0.0576497	0.0864745	0.0792683	0.0171225	0.030777	0.0251812	0.0432121	0.0363076	0.0563365	0.39087	0.429137	0.162075
TCGA-EJ-A46B	0.00534267	0.00571113	0.00497421	0.00497421	0.00350037	0.00607959	0.00405306	0.00405306	0.00423729	0.00534267	0.00497421	0.00644805	0.00460575	0.00571113	0.00718497	0.00663228	0.00663228	0.00626382	0.00829035	0.0092115	0.00829035	0.0101326	0.0117907	0.0149226	0.013633	0.0163965	0.0217391	0.0237657	0.0351879	0.0381356	0.0598747	0.093773	0.149595	0.00639533	0.0100323	0.0188106	0.0168688	0.0150215	0.0197076	0.497393	0.711787	0.258266
TCGA-EJ-A46D	0.00322407	0.0059108	0.00376142	0.00268673	0.00698549	0.00537346	0.00537346	0.00698549	0.00483611	0.00913487	0.0107469	0.0118216	0.00752284	0.00698549	0.00429876	0.0059108	0.00913487	0.0118216	0.00913487	0.0118216	0.0128963	0.0102096	0.0171951	0.0128963	0.0193444	0.0145083	0.0257926	0.0247179	0.0408383	0.0322407	0.0612574	0.112305	0.147233	0.00864509	0.0169519	0.0233088	0.0126683	0.0274974	0.037463	0.567207	0.513384	0.31684
TCGA-EJ-A46E	0.00527578	0.00263789	0.00167866	0.0028777	0.00407674	0.00383693	0.00479616	0.00383693	0.00263789	0.00239808	0.00359712	0.00503597	0.00479616	0.00503597	0.00551559	0.00503597	0.00503597	0.00527578	0.00479616	0.0088729	0.0107914	0.00647482	0.0122302	0.00815348	0.0158273	0.0136691	0.0165468	0.018705	0.0338129	0.0263789	0.0489209	0.106715	0.177218	0.00646317	0.0133775	0.0105612	0.00912022	0.00913661	0.0172887	0.50831	0.74974	0.127205
TCGA-EJ-A46F	0.000668896	0.000668896	0.00133779	0.00200669	0	0	0.000668896	0.00133779	0.000668896	0	0.00267559	0.000668896	0.00133779	0	0.00267559	0.000668896	0	0.00200669	0	0.00133779	0	0.00200669	0.000668896	0.00200669	0.00334448	0.00267559	0.00200669	0.0107023	0.0180602	0.0120401	0.0374582	0.09699	0.250836	0	0	0.00366819	0.00121835	0.00366161	0.00120097	0.447945	0.871999	0.027481
TCGA-EJ-A46G	0.00408035	0.00251099	0.00188324	0.00219711	0.00094162	0.00188324	0.00251099	0.00125549	0.00125549	0.00251099	0.00156937	0.00251099	0.00282486	0.00282486	0.00313873	0.00156937	0.00345261	0.00219711	0.00439422	0.00439422	0.00564972	0.00376648	0.00847458	0.00659134	0.0116133	0.0112994	0.0112994	0.0188324	0.022285	0.0313873	0.04457	0.0875706	0.175455	0.00143267	0.00421391	0.00491622	0.0041988	0.00701058	0.00896766	0.383538	0.885774	0.060475
TCGA-EJ-A46H	0.00874211	0.00898494	0.00509956	0.00461389	0.00558524	0.00607091	0.00752793	0.0080136	0.00509956	0.00874211	0.00607091	0.0106848	0.00777076	0.00655658	0.00631374	0.0109276	0.00631374	0.0109276	0.0116561	0.0138417	0.0191841	0.0135988	0.0189412	0.0182127	0.0196697	0.0174842	0.025255	0.0259835	0.0405537	0.0369111	0.0490529	0.0699369	0.103934	0.0105459	0.0320526	0.0248149	0.0278167	0.020642	0.0446845	0.432323	0.677778	0.708136
TCGA-EJ-A46I	0.00493899	0.00668216	0.00493899	0.00435793	0.0040674	0.00639163	0.00755375	0.00639163	0.00522952	0.00755375	0.00581058	0.0107496	0.00784428	0.00639163	0.00784428	0.00813481	0.00581058	0.0107496	0.00813481	0.0145264	0.0139454	0.00958745	0.0110401	0.0107496	0.0122022	0.015398	0.0171412	0.0200465	0.0281813	0.0290529	0.0339919	0.0618826	0.109239	0.00581961	0.0114115	0.00815106	0.00893402	0.0146456	0.0152114	0.299409	0.905393	0.278189
TCGA-FC-7708	0.00286533	0.0034384	0.00515759	0.00286533	0.00401146	0.00286533	0.00401146	0.00458453	0.00515759	0.00630372	0.00573066	0.00687679	0.00515759	0.00458453	0.00573066	0.0034384	0.00401146	0.00974212	0.00744986	0.0103152	0.0126074	0.00687679	0.0114613	0.0166189	0.0137536	0.017192	0.0148997	0.0206304	0.0355301	0.034957	0.0567335	0.112321	0.13467	0.00551485	0.0144185	0.0126162	0.00538756	0.0179908	0.00885122	0.413773	0.772962	0.72035
TCGA-FC-7961	0.00353535	0.00454545	0.0040404	0.0040404	0.00353535	0.00757576	0.0020202	0.00353535	0.0030303	0.00252525	0.00505051	0.00505051	0.00353535	0.0030303	0.00505051	0.0040404	0.00353535	0.00454545	0.0040404	0.0040404	0.00555556	0.00757576	0.00707071	0.00505051	0.0116162	0.00858586	0.0131313	0.0126263	0.0151515	0.0237374	0.029798	0.0636364	0.0919192	0.00586886	0.00383602	0.00287701	0.00764453	0.0057437	0.00753551	0.170512	0.970607	0.555508
TCGA-FC-A4JI	0.0125	0.014881	0.010119	0.010119	0.0130952	0.0154762	0.0136905	0.0136905	0.0107143	0.0178571	0.0107143	0.0184524	0.0190476	0.0113095	0.0136905	0.00892857	0.0160714	0.0214286	0.0136905	0.0220238	0.025	0.0208333	0.0202381	0.0184524	0.0232143	0.0255952	0.0267857	0.0255952	0.0375	0.0309524	0.0428571	0.0565476	0.0654762	0.0414203	0.0664524	0.0775278	0.0551785	0.0810739	0.0797743	0.396729	0.137052	0.863749
TCGA-FC-A5OB	0.00734394	0.00407997	0.00407997	0.00693594	0.00489596	0.00448796	0.00693594	0.00326397	0.00448796	0.00611995	0.00652795	0.00611995	0.00652795	0.00367197	0.00611995	0.00571195	0.00489596	0.00734394	0.00815993	0.00979192	0.00775194	0.0101999	0.0110159	0.00734394	0.0155039	0.0150959	0.0138719	0.0248878	0.0310078	0.0277438	0.0591595	0.109751	0.174215	0.0123846	0.0148405	0.0175388	0.0120987	0.0175073	0.0225272	0.562792	0.659007	0.966392
TCGA-FC-A66V	0.00535045	0.00374532	0.00321027	0.00267523	0.00481541	0.00481541	0.0058855	0.00374532	0.00642055	0.00481541	0.00321027	0.00481541	0.00535045	0.00802568	0.00535045	0.0058855	0.00267523	0.0058855	0.0058855	0.0144462	0.011236	0.012306	0.0171215	0.012306	0.0214018	0.0176565	0.0262172	0.0304976	0.0369181	0.0417335	0.0674157	0.105404	0.150883	0.00621796	0.0101605	0.0182889	0.0182233	0.0202845	0.0279431	0.559831	0.557846	0.269752
TCGA-FC-A6HD	0.00377358	0.00503145	0.00251572	0.00503145	0.00377358	0.00503145	0.00377358	0.0150943	0.00754717	0.00251572	0.00628931	0.00754717	0.00503145	0.00880503	0.0100629	0.00251572	0.00377358	0.00503145	0.0100629	0.00880503	0.0113208	0.00251572	0.0163522	0.0113208	0.0125786	0.0113208	0.00754717	0.0289308	0.0238994	0.0289308	0.0528302	0.120755	0.167296	0.00400778	0.00785872	0.0117881	0.00391527	0.0353008	0.0115783	0.510548	0.71016	0.877439
TCGA-FC-A8O0	0.00316035	0.00382568	0.00415835	0.00399202	0.00316035	0.00365935	0.00415835	0.00316035	0.00365935	0.00582169	0.00598802	0.00632069	0.00615436	0.00715236	0.00632069	0.00615436	0.00582169	0.00548902	0.00765136	0.00948104	0.0118097	0.010479	0.00948104	0.0121424	0.0158017	0.011477	0.0156354	0.0196274	0.0289421	0.0287758	0.0397538	0.0645376	0.078676	0.00491625	0.0120501	0.0056234	0.0108062	0.0100238	0.0142028	0.185607	0.947264	0.103572
TCGA-G9-6329	0.00394292	0.00375516	0.00281637	0.00469395	0.00281637	0.00544499	0.00244086	0.0045062	0.00375516	0.00506947	0.00506947	0.00600826	0.00600826	0.00563275	0.00638378	0.00469395	0.00431844	0.00788584	0.00826136	0.00976342	0.0110777	0.00957567	0.0135186	0.0122043	0.0159594	0.0152084	0.0191513	0.0300413	0.0336087	0.0360496	0.0583928	0.101953	0.118851	0.00124094	0.0121666	0.00486665	0.012123	0.0157882	0.0268878	0.37619	0.783877	0.164925
TCGA-G9-6332	0.00129116	0.00242092	0.00225952	0.00258231	0.0029051	0.00258231	0.00209813	0.00242092	0.00209813	0.00225952	0.00274371	0.00112976	0.00225952	0.00274371	0.00306649	0.00274371	0.00274371	0.00435765	0.00564881	0.00451904	0.00629438	0.00629438	0.00790833	0.00823112	0.00839251	0.00903809	0.0101679	0.0192059	0.022918	0.0214655	0.0416398	0.071175	0.105068	0.00318252	0.0024962	0.00530443	0.00217635	0.00685224	0.00888771	0.198442	0.960813	0.158697
TCGA-G9-6333	0.00215391	0.00254553	0.00176229	0.00215391	0.0019581	0.00176229	0.00332876	0.00254553	0.0019581	0.00254553	0.00313295	0.00293715	0.00313295	0.0019581	0.00567848	0.00274134	0.00469943	0.00763658	0.0060701	0.00900724	0.00861563	0.00900724	0.0107695	0.0105737	0.0146857	0.0117486	0.016448	0.0270217	0.0330918	0.0356374	0.0712747	0.132172	0.191698	0.0024484	0.00360074	0.00600123	0.00777362	0.0101838	0.0129678	0.573965	0.613246	0.0644892
TCGA-G9-6336	0.00288714	0.00314961	0.00328084	0.0015748	0.00301837	0.00223097	0.00341207	0.00393701	0.00367454	0.00406824	0.00446194	0.00446194	0.00446194	0.00406824	0.00446194	0.00419948	0.00485564	0.00616798	0.00564304	0.00682415	0.00800525	0.00774278	0.0119423	0.010105	0.014042	0.00944882	0.0190289	0.023622	0.0329396	0.0335958	0.0602362	0.104987	0.148031	0.00496754	0.00749283	0.00561963	0.00671938	0.00598351	0.015087	0.412846	0.806294	0.144003
TCGA-G9-6338	0.0175943	0.0174793	0.0178243	0.0160994	0.0148344	0.0212741	0.0185143	0.0175943	0.0137994	0.0179393	0.0162144	0.0163293	0.0157544	0.0143744	0.0173643	0.0125345	0.0132245	0.0190892	0.0120745	0.0124195	0.0149494	0.00977461	0.0150644	0.0103496	0.0126495	0.0121895	0.0109246	0.0121895	0.0162144	0.0186293	0.0218491	0.0464581	0.0776219	0.0489327	0.0809221	0.0919044	0.0840877	0.0680834	0.0635857	0.381159	0.721096	0.305447
TCGA-G9-6339	0.00539195	0.00539195	0.00331813	0.00788055	0.00497719	0.00705102	0.00331813	0.00663625	0.00290336	0.00580672	0.00788055	0.00414766	0.00871008	0.00248859	0.00746578	0.00207383	0.00580672	0.00871008	0.00456242	0.00622148	0.00788055	0.00705102	0.0157611	0.012443	0.0111987	0.0136873	0.0165906	0.0149316	0.0311074	0.0269598	0.0452095	0.0999585	0.154708	0.0117414	0.0115117	0.017907	0.00892141	0.022982	0.0276388	0.466087	0.774729	0.136511
TCGA-G9-6342	0.00207426	0.00290396	0.00124456	0.00145198	0.00124456	0.00165941	0.00165941	0.00228168	0.00145198	0.00207426	0.00331881	0.00186683	0.00311139	0.00248911	0.00248911	0.00186683	0.00373367	0.00456337	0.00352624	0.00622278	0.00601535	0.00601535	0.00663763	0.00767476	0.00829703	0.00767476	0.0136901	0.0147272	0.0211574	0.0265505	0.0528936	0.100602	0.177764	0.00141767	0.00277986	0.0046331	0.00369319	0.00277487	0.00409559	0.387896	0.876726	0.092306
TCGA-G9-6343	0.00318584	0.00318584	0.00176991	0.00318584	0.00283186	0.00424779	0.00353982	0.00212389	0.00318584	0.00141593	0.00353982	0.00389381	0.00247788	0.00460177	0.00460177	0.00353982	0.00495575	0.00530973	0.00672566	0.0060177	0.00672566	0.0060177	0.0113274	0.00920354	0.0116814	0.0099115	0.0169912	0.0148673	0.0272566	0.0261947	0.0484956	0.0835398	0.153982	0.00343241	0.0067305	0.0067305	0.00922126	0.00587862	0.0132215	0.357528	0.891765	0.254217
TCGA-G9-6347	0.00185497	0.00219224	0.00202361	0.00185497	0.00118044	0.00134907	0.00219224	0.00185497	0.000674536	0.00185497	0.00269815	0.00151771	0.00202361	0.00252951	0.00286678	0.00269815	0.00303541	0.00370995	0.00404722	0.00472175	0.00607083	0.00640809	0.00725126	0.00556492	0.00775717	0.00826307	0.0109612	0.0177066	0.0268128	0.0242833	0.0551433	0.10253	0.189039	0.00157519	0.00115828	0.00424701	0.00423178	0.00501019	0.00606754	0.422823	0.853945	0.184217
TCGA-G9-6348	0.00386183	0.00171637	0.00364729	0.00300365	0.0027891	0.00128728	0.00343274	0.00321819	0.00257455	0.00386183	0.00386183	0.00600729	0.0055782	0.00386183	0.00536366	0.00386183	0.00321819	0.00600729	0.00643639	0.00815276	0.0100837	0.00729457	0.00922549	0.00858185	0.0111564	0.0118	0.0199528	0.0199528	0.0311092	0.0336838	0.0549238	0.101051	0.15855	0.00303289	0.00475767	0.00535238	0.00948123	0.0142474	0.0116825	0.42935	0.815708	0.176015
TCGA-G9-6351	0.00105708	0.00317125	0.00211416	0.00237844	0.00158562	0.00290698	0.00290698	0.00396406	0.00396406	0.00343552	0.00396406	0.00528541	0.00343552	0.00317125	0.0044926	0.00396406	0.00502114	0.00739958	0.00924947	0.0134778	0.0145349	0.0100423	0.0134778	0.0105708	0.0147992	0.0182347	0.0158562	0.0256342	0.0383192	0.0362051	0.0552326	0.10333	0.137156	0.00335288	0.0041091	0.00575274	0.00409437	0.0106645	0.0185655	0.416684	0.775563	0.131445
TCGA-G9-6353	0.00289855	0.00230179	0.00187553	0.00179028	0.00230179	0.00196078	0.00153453	0.00289855	0.00332481	0.00306905	0.00213129	0.00255754	0.00255754	0.00289855	0.00255754	0.0028133	0.0028133	0.00341006	0.00238704	0.00417732	0.00400682	0.00392157	0.0059676	0.00323956	0.0057971	0.00460358	0.0057971	0.00826939	0.0127025	0.0110827	0.0204604	0.0409207	0.0695652	0.00115768	0.00151337	0.00302675	0.00213626	0.00188832	0.00383998	0.100535	0.99143	0.0888844
TCGA-G9-6354	0.00320573	0.00150858	0.00245144	0.00132001	0.000942863	0.00282859	0.00226287	0.00264002	0.00245144	0.00245144	0.00282859	0.00452574	0.00264002	0.00188573	0.00471431	0.00301716	0.00377145	0.00490289	0.00452574	0.00641147	0.00716576	0.00697718	0.00905148	0.00829719	0.0101829	0.0096172	0.0120686	0.0190458	0.0318688	0.0284744	0.0544975	0.102772	0.148972	0.00329593	0.00461635	0.00369308	0.00643971	0.00460806	0.0126957	0.356277	0.871752	0.133845
TCGA-G9-6356	0.00336202	0.00242066	0.00295858	0.00268962	0.00268962	0.00322754	0.00201721	0.00376547	0.00242066	0.0034965	0.00457235	0.00363098	0.0028241	0.00443787	0.00511027	0.00322754	0.00389995	0.00551372	0.00537924	0.00672405	0.00739645	0.00739645	0.0114309	0.0091447	0.013986	0.0125067	0.014255	0.0186928	0.0272996	0.0289134	0.0443787	0.0763852	0.095347	0.00366233	0.00448835	0.00329145	0.00506856	0.00567504	0.0102864	0.207255	0.945362	0.146809
TCGA-G9-6361	0.00136729	0.00324731	0.00341822	0.00376004	0.00273458	0.00410186	0.00324731	0.00239275	0.00222184	0.00410186	0.00393095	0.00324731	0.00444368	0.00324731	0.00427277	0.00581097	0.00495642	0.00427277	0.00598188	0.00615279	0.00734917	0.00854555	0.00820373	0.00871646	0.00752008	0.0107674	0.0136729	0.0150402	0.0198257	0.0246112	0.0432405	0.0791318	0.140147	0.00507599	0.0053595	0.00803924	0.00953622	0.00764268	0.00752017	0.306671	0.920387	0.152687
TCGA-G9-6362	0.00235818	0.00537141	0.00340626	0.00301323	0.00340626	0.00458535	0.0039303	0.00366828	0.0039303	0.00458535	0.00537141	0.00445434	0.00615747	0.00510939	0.00707454	0.00707454	0.0065505	0.00930172	0.00812263	0.00917071	0.0116599	0.00877768	0.0142801	0.0115289	0.0157212	0.0200445	0.0203066	0.026333	0.03891	0.038779	0.0609197	0.120136	0.153937	0.01129	0.00876306	0.0115303	0.0091912	0.0128908	0.0231033	0.529423	0.606021	0.927225
TCGA-G9-6363	0.00411612	0.00693241	0.00368284	0.00411612	0.00476603	0.0080156	0.00693241	0.00519931	0.00411612	0.00389948	0.0062825	0.00606586	0.00541594	0.00541594	0.0080156	0.00433276	0.00693241	0.010182	0.00671577	0.00844887	0.0114818	0.00996534	0.0151646	0.0121317	0.0132149	0.0136482	0.0123484	0.0216638	0.0305459	0.0301127	0.0463605	0.0957539	0.151213	0.00953016	0.0100111	0.0113459	0.0166254	0.0179877	0.0203214	0.455102	0.791539	0.161735
TCGA-G9-6364	0.00165419	0.00252068	0.00236314	0.00141788	0.00173297	0.00173297	0.00220559	0.0029933	0.00157542	0.00157542	0.00118157	0.00307208	0.00244191	0.00181174	0.00244191	0.00181174	0.00228436	0.00228436	0.00244191	0.00362347	0.00480504	0.00393856	0.00551398	0.00393856	0.00559275	0.00456873	0.00456873	0.00582907	0.0107917	0.0101615	0.0172509	0.0254431	0.0387554	0.00205165	0.00232912	0.00254086	0.00263724	0.00295901	0.00447136	0.0508858	0.997135	0.110193
TCGA-G9-6365	0.00264162	0.00220135	0.00234811	0.00205459	0.00190784	0.00264162	0.00278838	0.00308189	0.00117405	0.00366892	0.00308189	0.0033754	0.00293513	0.00264162	0.00308189	0.00425594	0.0033754	0.00513648	0.00352216	0.00513648	0.00631054	0.00557675	0.0088054	0.00645729	0.0104197	0.0113003	0.01086	0.0189316	0.0240681	0.0274435	0.054887	0.0990608	0.151893	0.00310992	0.00203272	0.00406543	0.00540115	0.00676357	0.00665515	0.342554	0.89064	0.264368
TCGA-G9-6366	0.00451092	0.00546059	0.00308642	0.0042735	0.00522317	0.00403609	0.00308642	0.00308642	0.00451092	0.00474834	0.00356125	0.00593542	0.00546059	0.0042735	0.00569801	0.00332384	0.00617284	0.00878443	0.00735992	0.00949668	0.0106838	0.0109212	0.0147198	0.0140076	0.0111586	0.0156695	0.0225546	0.0294397	0.0384615	0.0389364	0.0610161	0.115147	0.12963	0.00787937	0.0231756	0.0128753	0.0179608	0.0171363	0.0261355	0.45785	0.653232	0.493976
TCGA-G9-6367	0.00593802	0.00686584	0.00482464	0.00575246	0.00519577	0.00538133	0.00408239	0.00575246	0.00408239	0.0090926	0.00612359	0.00723696	0.00630915	0.00668027	0.00964929	0.00630915	0.00835034	0.0103915	0.00723696	0.0115049	0.0100204	0.00853591	0.0148451	0.0120616	0.0122472	0.0124327	0.0137317	0.0202264	0.0317313	0.0337725	0.0578957	0.104472	0.136575	0.0143387	0.0146972	0.0153362	0.0171914	0.0153087	0.0269884	0.45946	0.726645	0.861392
TCGA-G9-6369	0.00043122	0.00150927	0.000646831	0.00129366	0.00043122	0.00258732	0.00107805	0.00129366	0.00129366	0.00150927	0.00129366	0.000862441	0.00150927	0.0021561	0.00150927	0.00323415	0.00129366	0.00280293	0.00280293	0.00366537	0.00452781	0.00409659	0.00560586	0.00603708	0.00646831	0.00819319	0.00884002	0.0135834	0.0217766	0.0263044	0.0474342	0.101121	0.183484	0.00135773	0.00354977	0.000887443	0.00309491	0.0017717	0.00566573	0.368895	0.893411	0.112054
TCGA-G9-6370	0.00268721	0.0034038	0.00519527	0.00501612	0.0034038	0.00537442	0.00501612	0.00627015	0.00447868	0.00555357	0.00322465	0.00591186	0.00519527	0.00412039	0.00591186	0.00537442	0.00841992	0.00662845	0.00662845	0.00895736	0.00895736	0.0068076	0.0120029	0.00877822	0.0120029	0.0127195	0.012182	0.0136152	0.0223934	0.0198853	0.0300967	0.0530276	0.0929774	0.00623497	0.00878741	0.0068771	0.00875591	0.0102971	0.0120084	0.193715	0.96335	0.207788
TCGA-G9-6371	0.00466842	0.00311228	0.00239406	0.00227436	0.00299258	0.00335169	0.00215466	0.00323198	0.00335169	0.0039502	0.00359109	0.00514723	0.0037108	0.00430931	0.00478813	0.00502753	0.00454872	0.00562605	0.00730189	0.00790041	0.00981566	0.00957625	0.00957625	0.0101748	0.0119703	0.0129279	0.0148432	0.0233421	0.0341154	0.0360306	0.0570984	0.11276	0.147235	0.00573834	0.00843909	0.00597769	0.00945994	0.00947694	0.0145056	0.422525	0.784935	0.105315
TCGA-G9-6373	0.00106007	0.00176678	0.00176678	0.0024735	0.00212014	0.00318021	0.0024735	0.00318021	0.00141343	0.00176678	0.00212014	0.00176678	0.00318021	0.00282686	0.00141343	0.00388693	0.00424028	0.00212014	0.004947	0.00424028	0.00353357	0.00530035	0.00671378	0.00777385	0.0130742	0.00989399	0.00883392	0.0109541	0.0180212	0.0204947	0.0374558	0.0780919	0.128622	0.00138163	0.0027092	0.0033865	0	0.00473259	0.00864821	0.240849	0.950825	0.154636
TCGA-G9-6377	0	0.000735024	0	0.000735024	0	0.00110254	0.000735024	0.000367512	0.00110254	0.000735024	0.000367512	0.000367512	0.000367512	0	0.000367512	0.000735024	0.000735024	0.000735024	0.00147005	0.00147005	0.00220507	0.0029401	0.00147005	0.00220507	0.00147005	0.00330761	0.00404263	0.00551268	0.00845277	0.0102903	0.0257258	0.0661521	0.171628	0.000568034	0.00167076	0.00055692	0.000554924	0	0.00218804	0.254081	0.96083	0.0198611
TCGA-G9-6378	0.00701262	0.00752263	0.00612011	0.00816014	0.00535509	0.00714012	0.00701262	0.00803264	0.00841515	0.00879765	0.00765013	0.00854265	0.00956267	0.00688512	0.00828765	0.00739513	0.00816014	0.0105827	0.0100727	0.0124952	0.0151728	0.0113477	0.0140252	0.0130052	0.0168303	0.0174678	0.0188703	0.0242254	0.0367206	0.0367206	0.056611	0.0988142	0.129925	0.00945726	0.0169991	0.0164839	0.0225842	0.0251957	0.0364289	0.5128	0.600867	0.480888
TCGA-G9-6379	0.00203666	0.00203666	0.000872854	0.00203666	0.000581903	0.00378237	0.00232761	0.00145476	0.00174571	0.00407332	0.00116381	0.00203666	0.00261856	0.00290951	0.00378237	0.00523713	0.00349142	0.00610998	0.00494617	0.00640093	0.00785569	0.00843759	0.00989235	0.00669188	0.0165842	0.0096014	0.0151295	0.0189118	0.0407332	0.0389875	0.0628455	0.145476	0.182717	0.00171965	0.00421502	0.00674403	0.00335992	0.00589044	0.010764	0.517192	0.676138	0.122637
TCGA-G9-6384	0.00245952	0.0030744	0.00286944	0.00389424	0.00430416	0.00245952	0.00122976	0.00286944	0.00286944	0.00450912	0.00348432	0.00286944	0.00368928	0.00348432	0.00327936	0.00266448	0.00450912	0.00553392	0.00389424	0.00676368	0.00696864	0.00553392	0.0112728	0.010453	0.0170117	0.0116827	0.0161918	0.020701	0.0317688	0.0379176	0.0637426	0.125436	0.156385	0.0029966	0.00470074	0.00528833	0.00644035	0.00410577	0.0121199	0.43799	0.763468	0.563019
TCGA-G9-6385	0.00318952	0.00436461	0.00335739	0.00268592	0.00369313	0.00402887	0.00352526	0.00369313	0.00302166	0.00470035	0.003861	0.00520396	0.00453248	0.00436461	0.00352526	0.00453248	0.00436461	0.00654692	0.00503609	0.00923284	0.00839349	0.00805775	0.00906497	0.00805775	0.0142689	0.0134296	0.0159476	0.0240054	0.0323989	0.0329025	0.0634548	0.110458	0.15763	0.00875514	0.00908876	0.00908876	0.0105655	0.00806441	0.0168622	0.463192	0.756695	0.0737127
TCGA-G9-6494	0.00213605	0.0027933	0.00295761	0.00312192	0.000985869	0.00246467	0.00312192	0.00246467	0.00295761	0.00377917	0.00230036	0.00312192	0.00476503	0.00377917	0.0042721	0.0042721	0.0042721	0.00509366	0.00607953	0.00624384	0.00788695	0.00903713	0.0131449	0.0119947	0.0141308	0.0141308	0.014788	0.0192244	0.0305619	0.0340125	0.0547157	0.0971081	0.147223	0.0027203	0.00444513	0.00533416	0.00620087	0.00754317	0.0144079	0.389095	0.84246	0.0916634
TCGA-G9-6496	0.00458575	0.0036686	0.00397432	0.00152858	0.00214002	0.00428004	0.00428004	0.00428004	0.0036686	0.00428004	0.00305717	0.00458575	0.00642006	0.00397432	0.0036686	0.00428004	0.00489147	0.00764292	0.00489147	0.00947722	0.00886579	0.00856007	0.00947722	0.00886579	0.0113115	0.0100887	0.0174259	0.0223173	0.0385203	0.036686	0.0583919	0.119841	0.150718	0.00647362	0.00997379	0.00634696	0.00813112	0.0135762	0.00890573	0.436694	0.767979	0.466768
TCGA-G9-6498	0.00361664	0.00361664	0.00309997	0.00439163	0.00309997	0.00284164	0.00361664	0.00464996	0.00129166	0.00335831	0.00258331	0.00542495	0.00490829	0.00490829	0.00516662	0.00439163	0.00439163	0.00335831	0.0082666	0.00904159	0.00774994	0.0100749	0.0103332	0.00929992	0.0144665	0.00878326	0.0209248	0.0273831	0.0387497	0.0480496	0.0746577	0.152157	0.185223	0.00700468	0.00944299	0.00772608	0.00513226	0.0137106	0.0126477	0.601311	0.45874	0.144086
TCGA-G9-7510	0.00109769	0.000823271	0	0.000548847	0.00137212	0.00164654	0.00137212	0.000548847	0.00164654	0.00164654	0.00219539	0.00164654	0.00219539	0.00246981	0.000823271	0.00274424	0.00109769	0.0046652	0.00274424	0.00548847	0.0046652	0.0057629	0.00521405	0.00658617	0.00933041	0.00960483	0.0101537	0.0145445	0.0225027	0.0279912	0.0447311	0.079034	0.125412	0.00212243	0.00104045	0.000520225	0.00155508	0.00207717	0.00306581	0.232258	0.951393	0.00885901
TCGA-G9-7519	0.0040037	0.00554358	0.00246381	0.00585156	0.00369572	0.00677549	0.00585156	0.00677549	0.0052356	0.00831537	0.00677549	0.00739144	0.00831537	0.00492763	0.00769941	0.00615953	0.0107792	0.0113951	0.00769941	0.0144749	0.0107792	0.012935	0.0147829	0.0138589	0.0212504	0.0209424	0.0175547	0.0255621	0.0384971	0.0375731	0.05328	0.0957807	0.122575	0.0157977	0.0226372	0.0131057	0.0189946	0.0225966	0.0339367	0.46325	0.663448	0.449528
TCGA-G9-7521	0.00251527	0.00359324	0.0014373	0.00359324	0.0014373	0.00431189	0.00215595	0.00395257	0.0014373	0.00179662	0.00323392	0.00215595	0.00503054	0.00503054	0.00610852	0.0028746	0.00395257	0.00646784	0.00790514	0.00718649	0.00790514	0.00718649	0.00898311	0.00682716	0.0118577	0.0114984	0.0172476	0.0244341	0.0370104	0.0359324	0.0693496	0.118577	0.185771	0.00328583	0.00536923	0.00429538	0.00427998	0.00750343	0.0105474	0.54237	0.682945	0.221937
TCGA-G9-7522	0	0.00151229	0	0.000756144	0.000378072	0.00113422	0.000756144	0.000378072	0.000756144	0.00151229	0.00113422	0.000756144	0.000378072	0.00151229	0.000756144	0.00151229	0.000756144	0.0026465	0.00302457	0.0026465	0.00378072	0.00226843	0.00680529	0.00453686	0.00567108	0.0102079	0.00907372	0.0155009	0.0283554	0.0238185	0.0722117	0.124764	0.226465	0.000886058	0.00173744	0.000868721	0.00173121	0.00173433	0.00255979	0.508359	0.780785	0.0153533
TCGA-G9-7523	0.00266951	0.00266951	0.00373732	0.00320342	0.00320342	0.00266951	0.00427122	0.00480513	0.00213561	0.00320342	0.00533903	0.00480513	0.00640683	0.00694074	0.00854245	0.00587293	0.00640683	0.00533903	0.00587293	0.0106781	0.00587293	0.00694074	0.00854245	0.00533903	0.0101442	0.00800854	0.016551	0.016551	0.0234917	0.0229578	0.0517886	0.0950347	0.179925	0.0014204	0.00835568	0.00417784	0.0152638	0.00834068	0.0123105	0.458483	0.825813	0.316025
TCGA-G9-7525	0.0045977	0.0031348	0.00208986	0.00543365	0.00292581	0.00397074	0.00376176	0.00376176	0.00376176	0.00626959	0.00355277	0.00585162	0.00522466	0.00355277	0.00543365	0.00417973	0.00438871	0.00585162	0.00564263	0.00626959	0.00961338	0.00856844	0.0110763	0.00794148	0.0133751	0.0125392	0.0123302	0.0196447	0.0275862	0.0284222	0.0524556	0.0978056	0.140021	0.00686414	0.0106556	0.00953393	0.00782332	0.00895701	0.0154235	0.36708	0.857433	0.634438
TCGA-G9-A9S0	0.00565099	0.00542495	0.0045208	0.00429476	0.00271248	0.00361664	0.00610307	0.00474684	0.00678119	0.00610307	0.00565099	0.00700723	0.00678119	0.00497288	0.00700723	0.00497288	0.00723327	0.00768535	0.00700723	0.00949367	0.0135624	0.00971971	0.0146926	0.0122061	0.017179	0.0140145	0.0194394	0.02283	0.0359403	0.040009	0.0637432	0.105108	0.136302	0.00923747	0.0131734	0.0123501	0.0180485	0.0205465	0.0291128	0.485019	0.65554	0.767046
TCGA-G9-A9S7	0.00409965	0.00567644	0.00252286	0.00473037	0.00536108	0.00630716	0.00819931	0.00567644	0.00504573	0.00693787	0.0059918	0.00567644	0.00725323	0.00473037	0.00441501	0.00662252	0.00756859	0.0110375	0.0113529	0.0138757	0.0173447	0.013245	0.0195522	0.0119836	0.0170293	0.0179754	0.0198675	0.0233365	0.0394197	0.0334279	0.0580259	0.0930306	0.112267	0.00868333	0.0170269	0.0109458	0.0193895	0.0169963	0.0286695	0.422979	0.677242	0.415849
TCGA-H9-7775	0.00821355	0.0184805	0.0102669	0.0123203	0.00616016	0.0123203	0.0123203	0.0123203	0.0102669	0.0102669	0.0143737	0.0164271	0.0123203	0.0143737	0.0225873	0.00821355	0.0102669	0.0143737	0.0102669	0.0143737	0.0184805	0.0246407	0.0225873	0.0225873	0.0308008	0.0246407	0.0184805	0.0410678	0.0349076	0.0205339	0.0349076	0.0492813	0.0513347	0.0254567	0.0249586	0.0873552	0.111911	0.0871985	0.049029	0.304785	0.438891	0.552071
TCGA-H9-A6BX	0.00264085	0.00528169	0.0096831	0.00264085	0.00704225	0.00352113	0.000880282	0.00792254	0.00440141	0.00352113	0.00880282	0.00352113	0.00792254	0.00704225	0.00704225	0.00528169	0.00880282	0.0123239	0.0132042	0.0096831	0.0193662	0.0105634	0.0211268	0.0158451	0.0202465	0.0176056	0.0352113	0.0237676	0.0510563	0.0519366	0.0704225	0.0933099	0.120599	0.00392566	0.0153954	0.0269419	0.0115051	0.0268936	0.0415839	0.515127	0.391045	0.038363
TCGA-H9-A6BY	0.00959693	0.0153551	0.00767754	0.00767754	0.0172745	0.0153551	0.0153551	0.00959693	0.0172745	0.0134357	0.0115163	0.0115163	0.0211132	0.00767754	0.0153551	0.0115163	0.00767754	0.0211132	0.0115163	0.0134357	0.00767754	0.0153551	0.0191939	0.0191939	0.0172745	0.024952	0.0153551	0.024952	0.0441459	0.024952	0.0441459	0.0652591	0.0729367	0.045863	0.0337242	0.056207	0.0784078	0.0561062	0.0772896	0.417318	0.285533	0.2257
TCGA-HC-7075	0	0	0.00248139	0.00248139	0.00496278	0.00744417	0.00744417	0.00744417	0	0	0.00248139	0	0.00248139	0.00496278	0.00248139	0.00992556	0.00496278	0.00744417	0.00744417	0.00992556	0	0.00496278	0.00496278	0.00744417	0.00248139	0.0124069	0.0173697	0.0223325	0.0223325	0.0248139	0.0669975	0.156328	0.223325	0	0.00696353	0	0	0	0.0205189	0.612259	0.598653	0.989666
TCGA-HC-7077	0.00306748	0.00613497	0.0122699	0.0122699	0.00306748	0.00613497	0.00306748	0.0153374	0.0184049	0.0184049	0.00306748	0	0.0153374	0.0184049	0.00613497	0.00920245	0.00920245	0.0153374	0.0122699	0.00920245	0.00613497	0.00306748	0.0214724	0.00920245	0.0276074	0.00613497	0.0184049	0.0245399	0.0368098	0.0306748	0.0306748	0.110429	0.113497	0.0449223	0	0.0293622	0.058514	0.0293096	0.0865192	0.530669	0.243821	0.784221
TCGA-HC-7078	0.00746269	0	0	0.00746269	0	0	0	0	0.0149254	0	0.00746269	0	0.00746269	0	0	0	0	0.00746269	0.0149254	0.0149254	0.00746269	0	0.0223881	0.00746269	0.0298507	0.0149254	0.00746269	0.00746269	0.0597015	0.0447761	0.0522388	0.171642	0.134328	0.0271621	0.0532613	0	0	0.0797486	0	0.468292	0.41626	0.93867
TCGA-HC-7079	0.00863931	0.0237581	0.00647948	0.012959	0.0151188	0.012959	0.0151188	0.012959	0.0107991	0.012959	0.00863931	0.0237581	0.0194384	0.0259179	0.0151188	0.0151188	0.012959	0.0323974	0.012959	0.012959	0.012959	0.0259179	0.0323974	0.0215983	0.0280778	0.0237581	0.0151188	0.0215983	0.0388769	0.0345572	0.0475162	0.049676	0.0388769	0.0697661	0.0136802	0.0547209	0.0681559	0.0546227	0.0671839	0.240563	0.0935522	0.872907
TCGA-HC-7080	0	0.015625	0.0078125	0.0234375	0.0078125	0	0.0078125	0	0.0078125	0.015625	0	0.015625	0.0078125	0.0078125	0.0078125	0.015625	0.0234375	0.015625	0.0078125	0.0078125	0.046875	0.015625	0.0390625	0.015625	0.03125	0.0390625	0.0390625	0.015625	0.0625	0	0.0703125	0.0703125	0.0234375	0.0419052	0	0.0410853	0.040938	0.123035	0.0403542	0.120412	0.240824	0.601749
TCGA-HC-7081	0.015534	0.00970874	0.0135922	0.00582524	0.00776699	0.0116505	0.0174757	0.0116505	0.0116505	0.0213592	0.015534	0.015534	0.00776699	0.00776699	0.0291262	0.0116505	0.023301	0.015534	0.0116505	0.0213592	0.023301	0.0271845	0.023301	0.0174757	0.0330097	0.00970874	0.0213592	0.0174757	0.0368932	0.0194175	0.0368932	0.0563107	0.0543689	0.0373578	0.0488358	0.0854626	0.0486607	0.109683	0.107925	0.333964	0.214691	0.168031
TCGA-HC-7209	0.00974026	0.012987	0.00974026	0.0227273	0.012987	0.00649351	0.00974026	0.012987	0.00974026	0.00649351	0.00649351	0.0324675	0.0292208	0.0162338	0.00649351	0.012987	0.0162338	0.0194805	0.0194805	0.0162338	0.0194805	0.00974026	0.0357143	0.012987	0.0194805	0.0194805	0.0454545	0.0227273	0.0162338	0.0357143	0.0227273	0.0487013	0.0584416	0.0383644	0.0564206	0.0752275	0.0374789	0.112639	0.0369444	0.330714	0.477698	0.738485
TCGA-HC-7210	0.00557621	0.00371747	0.00557621	0.00929368	0.00743494	0.00929368	0	0.00743494	0.00743494	0.00557621	0.00929368	0.0130112	0.00743494	0.0130112	0.00929368	0.00371747	0.0130112	0.0167286	0.0130112	0.0130112	0.0111524	0.0204461	0.0260223	0.0390335	0.0241636	0.0334572	0.027881	0.0204461	0.0427509	0.0539033	0.0576208	0.0650558	0.0836431	0.0280752	0.0275258	0.00917528	0.00914238	0.0457941	0.036048	0.403362	0.439216	0.589561
TCGA-HC-7211	0.00402414	0.00704225	0.00402414	0.00503018	0.00503018	0.00402414	0.00402414	0.00804829	0.00704225	0.00503018	0.00905433	0.00603622	0.00503018	0.00905433	0.00503018	0.00804829	0.0100604	0.0100604	0.00402414	0.0110664	0.0130785	0.0181087	0.0191147	0.0150905	0.0241449	0.0201207	0.0231388	0.027163	0.0331992	0.0392354	0.0663984	0.115694	0.139839	0.0128217	0.0209514	0.00838056	0.0375773	0.0250966	0.0452729	0.569011	0.417548	0.875956
TCGA-HC-7212	0.00898204	0.011976	0.0134731	0.00598802	0.00449102	0.0134731	0.010479	0.00898204	0.0149701	0.0134731	0.00598802	0.0164671	0.00898204	0.011976	0.00898204	0.00898204	0.00748503	0.0164671	0.0149701	0.0209581	0.0134731	0.011976	0.0284431	0.0209581	0.0299401	0.0224551	0.0239521	0.0314371	0.0464072	0.0374251	0.0508982	0.0688623	0.0838323	0	0.0492008	0.0164003	0.0653659	0.0736688	0.104705	0.448613	0.192263	0.771322
TCGA-HC-7213	0.00395778	0.00923483	0.00659631	0.00791557	0.00791557	0.0118734	0.0131926	0.00659631	0.00791557	0.0131926	0.0158311	0.0131926	0.0118734	0.00923483	0.0105541	0.00923483	0.0145119	0.00791557	0.00791557	0.0184697	0.0356201	0.0184697	0.0382586	0.0184697	0.0224274	0.0237467	0.0277045	0.0422164	0.0527704	0.0514512	0.0501319	0.060686	0.0263852	0.0153672	0.0301331	0.0376664	0.0225188	0.0751976	0.0739922	0.147189	0.206065	0.93612
TCGA-HC-7230	0.00260078	0.00130039	0.00130039	0.00260078	0.00130039	0.00260078	0.00780234	0.00260078	0.00130039	0.00910273	0.00780234	0.00910273	0.00650195	0.00780234	0.0130039	0.00390117	0.00650195	0.00650195	0.00390117	0.00650195	0.0130039	0.00520156	0.0169051	0.0195059	0.0156047	0.0169051	0.0351105	0.0325098	0.0481144	0.046814	0.0884265	0.104031	0.152146	0.00517368	0.0152174	0.0253623	0.00505427	0.0354435	0.0348753	0.579785	0.406345	0.0562296
TCGA-HC-7231	0.00510204	0	0.00510204	0	0.0153061	0.00510204	0	0.0102041	0	0.00510204	0.0102041	0.00510204	0.0102041	0.0102041	0.0102041	0.00510204	0	0.0204082	0	0.0204082	0.0204082	0.00510204	0.0153061	0.0102041	0.0357143	0.0306122	0.0153061	0.0153061	0.0357143	0.0408163	0.0663265	0.117347	0.137755	0.020219	0	0.0396469	0	0	0	0.522884	0.54225	0.131788
TCGA-HC-7232	0.00830258	0.0147601	0.00645756	0.0119926	0.0101476	0.0119926	0.0129151	0.0230627	0.00738007	0.0110701	0.0166052	0.0147601	0.0175277	0.0110701	0.0147601	0.0147601	0.0119926	0.0156827	0.0193727	0.0193727	0.0166052	0.0175277	0.0184502	0.0129151	0.0193727	0.0221402	0.0175277	0.0276753	0.0405904	0.0369004	0.0461255	0.045203	0.0618081	0.0684581	0.0391526	0.0447458	0.0613049	0.0446655	0.10438	0.3661	0.207639	0.400946
TCGA-HC-7233	0.00628931	0.00314465	0.00314465	0.00314465	0.00314465	0.00314465	0.00628931	0.00314465	0.00314465	0.00628931	0	0	0.0125786	0.00628931	0.00628931	0.00628931	0.00943396	0.00628931	0.00314465	0	0.00943396	0.00628931	0.00628931	0.0157233	0.0157233	0.0188679	0.0314465	0.0345912	0.0377358	0.0220126	0.0534591	0.100629	0.147799	0	0.0192442	0.00962211	0.0287629	0	0.00945089	0.441806	0.78021	0.16675
TCGA-HC-7736	0.00463822	0.00556586	0.00278293	0.000927644	0.00463822	0.00463822	0.00371058	0.00463822	0.00185529	0.00371058	0.00185529	0.00742115	0.00463822	0.00649351	0.00463822	0.00463822	0.00278293	0.00463822	0.00556586	0.012987	0.0139147	0.0120594	0.0102041	0.0111317	0.0194805	0.0157699	0.028757	0.025974	0.0343228	0.0371058	0.0788497	0.16141	0.205937	0.00957384	0.0219019	0.00312884	0.00623524	0.0187393	0.0215121	0.678577	0.259815	0.983835
TCGA-HC-7737	0	0.0121212	0.0181818	0.00606061	0	0.00606061	0	0	0	0	0.00606061	0.00606061	0.00606061	0.00606061	0.0181818	0.00606061	0.0121212	0.0121212	0.0121212	0.00606061	0.0121212	0.0121212	0	0.00606061	0.0242424	0.030303	0.0242424	0.0242424	0.0666667	0.0363636	0.0727273	0.127273	0.187879	0.0232931	0.0228373	0	0.0455109	0	0.0224309	0.691624	0.133863	0.936329
TCGA-HC-7738	0.00679821	0.00696402	0.00480849	0.00596916	0.00580335	0.00712983	0.00762726	0.00812469	0.00596916	0.00779307	0.00878793	0.00812469	0.010446	0.00712983	0.00862212	0.0066324	0.00845631	0.0099486	0.00961698	0.0145913	0.0162494	0.0137622	0.0185707	0.0170784	0.0225502	0.01741	0.0263638	0.0283535	0.0402918	0.0404576	0.0557122	0.0958382	0.110927	0.0143808	0.0200361	0.0244885	0.0406679	0.0266668	0.0444611	0.484995	0.505294	0.20604
TCGA-HC-7740	0.0070922	0.0115248	0.00797872	0.00886525	0.00975177	0.0115248	0.00975177	0.00531915	0.00975177	0.00620567	0.00797872	0.00620567	0.00797872	0.00975177	0.0106383	0.00886525	0.0115248	0.0150709	0.0106383	0.0248227	0.0150709	0.0115248	0.0141844	0.0248227	0.0230496	0.0265957	0.0248227	0.0292553	0.0390071	0.0407801	0.0647163	0.0824468	0.0780142	0.0237894	0.0233239	0.0279887	0.0650729	0.0372513	0.0595631	0.401031	0.314444	0.355757
TCGA-HC-7742	0.0128535	0.0102828	0.0179949	0.00514139	0.00771208	0.0102828	0.0102828	0.0154242	0.0102828	0.00771208	0.00771208	0.0154242	0.0205656	0.0102828	0.0154242	0.0179949	0.00771208	0.0179949	0.0179949	0.0179949	0.0308483	0.0308483	0.0205656	0.0179949	0.0205656	0.0102828	0.0128535	0.0231362	0.0282776	0.0488432	0.0437018	0.0848329	0.0874036	0.0144416	0.056636	0.028318	0.0705412	0.0424008	0.0556282	0.4703	0.124491	0.444455
TCGA-HC-7744	0.00841908	0.00841908	0.00374181	0.00654818	0.00280636	0.01029	0.00467727	0.00467727	0.00654818	0.00374181	0.00374181	0.00748363	0.00748363	0.00748363	0.01029	0.00467727	0.00841908	0.00467727	0.0130964	0.0130964	0.0159027	0.0121609	0.0261927	0.01029	0.0280636	0.0168382	0.03087	0.0364827	0.0617399	0.0589336	0.0767072	0.109448	0.0729654	0.0132846	0.0434157	0.0260494	0.02163	0.0260027	0.0639647	0.33083	0.262967	0.959347
TCGA-HC-7745	0.00316957	0.00158479	0.00633914	0.00633914	0.00633914	0.00950872	0.00158479	0.00316957	0.00475436	0.00475436	0.00158479	0.00792393	0.00950872	0.0126783	0.00792393	0.00475436	0.00475436	0.0110935	0.00633914	0.0190174	0.022187	0.0110935	0.022187	0.0126783	0.0206022	0.0237718	0.0206022	0.0332805	0.0412044	0.0522979	0.0649762	0.110935	0.110935	0	0	0.0269589	0.0134311	0.0134553	0.0397188	0.460896	0.460896	0.159975
TCGA-HC-7747	0.00746269	0.00959488	0.010661	0.00426439	0.00319829	0.00533049	0.00426439	0.00319829	0.00639659	0.00852878	0.00639659	0.00319829	0.0127932	0.00319829	0.00852878	0.010661	0.010661	0.00959488	0.0117271	0.0117271	0.0234542	0.0159915	0.0127932	0.0149254	0.0159915	0.0234542	0.0277186	0.04371	0.0554371	0.0458422	0.0682303	0.0810235	0.101279	0.0154832	0.0303605	0.0202403	0.00504194	0.015153	0.0695805	0.469617	0.31143	0.0562173
TCGA-HC-7748	0.0145455	0.01	0.00636364	0.00909091	0.0118182	0.0127273	0.0163636	0.0118182	0.0109091	0.0127273	0.0154545	0.00909091	0.0136364	0.00909091	0.0163636	0.0118182	0.0163636	0.0190909	0.0172727	0.0245455	0.0127273	0.0127273	0.0145455	0.0172727	0.0263636	0.02	0.0327273	0.0309091	0.04	0.0463636	0.0563636	0.0627273	0.0363636	0.0340263	0.0444807	0.0667211	0.0831024	0.105452	0.0983007	0.217273	0.157523	0.856169
TCGA-HC-7749	0.00408163	0.00816327	0.00408163	0.00204082	0.00204082	0.00408163	0.0102041	0.00204082	0.00204082	0.0142857	0.00204082	0.0102041	0.00612245	0.00612245	0.0102041	0.00816327	0.00612245	0.00612245	0.0163265	0.00612245	0.0142857	0.0102041	0.00408163	0.0102041	0.0183673	0.00612245	0.0244898	0.0244898	0.0265306	0.0326531	0.0510204	0.077551	0.0857143	0.0173357	0.0056655	0.0056655	0.00564519	0.0282767	0.00556468	0.232461	0.907706	0.587154
TCGA-HC-7750	0.0132576	0.0227273	0.0151515	0.0113636	0.00378788	0.0094697	0.0208333	0.0094697	0.0151515	0.0189394	0.0113636	0.0132576	0.0265152	0.0113636	0.0170455	0.0227273	0.0208333	0.032197	0.0132576	0.0340909	0.0227273	0.0265152	0.0208333	0.0170455	0.0284091	0.0227273	0.0094697	0.0454545	0.0397727	0.030303	0.0284091	0.0492424	0.0340909	0.0500559	0.0858838	0.0736147	0.0855759	0.0734826	0.0482032	0.215749	0.0479442	0.820098
TCGA-HC-7752	0.002079	0.002079	0.004158	0.010395	0.00623701	0.00831601	0.012474	0.00623701	0.00831601	0.010395	0.018711	0.018711	0.022869	0.00623701	0.014553	0.00831601	0.00623701	0.02079	0.012474	0.012474	0.02079	0.022869	0.018711	0.016632	0.024948	0.024948	0.031185	0.04158	0.0665281	0.0519751	0.0561331	0.0540541	0.045738	0.0117281	0.0114986	0.0344959	0.0229148	0.0918241	0.0903521	0.247134	0.2022	0.556696
TCGA-HC-7817	0.0159744	0.0159744	0.00638978	0.0223642	0.0127796	0.0159744	0.0159744	0.00319489	0.00958466	0.00638978	0.0191693	0.00958466	0.00638978	0.00958466	0.00958466	0.0191693	0.00958466	0.0127796	0.0159744	0.0255591	0.0415335	0.0159744	0.0159744	0.0191693	0.0159744	0.0351438	0.0191693	0.028754	0.0351438	0.0191693	0.0447284	0.0415335	0.0638978	0.0591696	0.0193373	0.0580119	0.0770719	0.0965131	0.132952	0.377823	0.32115	0.867706
TCGA-HC-7818	0.0116183	0.0182573	0.00912863	0.00995851	0.00829876	0.0107884	0.00912863	0.013278	0.00580913	0.006639	0.0116183	0.0149378	0.013278	0.0116183	0.013278	0.0157676	0.0124481	0.0165975	0.0107884	0.0207469	0.0224066	0.0165975	0.0215768	0.0207469	0.0182573	0.019917	0.0182573	0.0323651	0.0381743	0.033195	0.0481328	0.06639	0.06639	0.0295379	0.0627465	0.0820531	0.0673309	0.0433619	0.099556	0.377224	0.315925	0.374927
TCGA-HC-7819	0	0.00207469	0.00207469	0.00414938	0.00622407	0.00414938	0.00414938	0.00207469	0.00622407	0.00414938	0.00622407	0.00207469	0.00829876	0.00829876	0.00414938	0.00622407	0.00622407	0.0145228	0.0145228	0.0186722	0.0186722	0.00622407	0.0145228	0.0124481	0.0290456	0.026971	0.0311203	0.0477178	0.0622407	0.0456432	0.0809129	0.10166	0.112033	0	0.00912856	0.0182571	0.0181917	0.0364487	0.0358645	0.48157	0.169441	0.22377
TCGA-HC-7820	0.00427468	0.00330943	0.00234418	0.00234418	0.00151682	0.00358522	0.00289575	0.00275786	0.00275786	0.00537783	0.00468836	0.00289575	0.00358522	0.00358522	0.00413679	0.00427468	0.00482625	0.00510204	0.00523993	0.00703254	0.00854937	0.00799779	0.0111693	0.0117209	0.0144788	0.0117209	0.0173745	0.0223387	0.0372311	0.0321291	0.0568119	0.0944567	0.124517	0.00422281	0.00715123	0.00639847	0.00712559	0.00638699	0.0136783	0.33203	0.860411	0.0882167
TCGA-HC-7821	0.0028169	0.00469484	0.00469484	0.00375587	0.0056338	0.00375587	0.0056338	0.00469484	0.00469484	0.00187793	0.0056338	0.0103286	0.0140845	0.0112676	0.00469484	0.0112676	0.0112676	0.0131455	0.00938967	0.0159624	0.0150235	0.0131455	0.0215962	0.0159624	0.029108	0.0244131	0.0319249	0.0356808	0.0535211	0.056338	0.0807512	0.120188	0.0910798	0.00430862	0.0253459	0.0337945	0.025255	0.0126502	0.0456405	0.400305	0.0412685	0.986011
TCGA-HC-8213	0.00346821	0.00346821	0.00115607	0.00231214	0.00346821	0.00115607	0.00231214	0.00231214	0.00231214	0.00578035	0.00462428	0.00578035	0.00462428	0.00462428	0.00693642	0.00693642	0.00462428	0.00231214	0.0115607	0.00693642	0.00924855	0.0127168	0.0150289	0.0115607	0.0196532	0.0265896	0.0323699	0.0312139	0.0520231	0.0624277	0.0820809	0.134104	0.14104	0.0176299	0.00864248	0.00864248	0.017223	0.00862698	0.012733	0.515029	0.417933	0.0273057
TCGA-HC-8216	0.00917431	0.00611621	0.0183486	0.0183486	0.00611621	0	0.00611621	0.0030581	0.00611621	0.00611621	0.0244648	0.0214067	0.0183486	0.00611621	0.0122324	0.00917431	0.0183486	0.0214067	0.0122324	0.0152905	0.0336391	0.0244648	0.0336391	0.030581	0.0366972	0.0152905	0.0397554	0.0366972	0.0366972	0.0428135	0.0366972	0.0795107	0.0489297	0.0541219	0.0353753	0.053063	0.105745	0	0.0868645	0.276473	0.0518387	0.879002
TCGA-HC-8256	0.00185254	0.00111152	0.00222305	0.00148203	0.00370508	0.00259355	0.00370508	0.00185254	0.00296406	0.00185254	0.00333457	0.00518711	0.00222305	0.00407558	0.00296406	0.00407558	0.00666914	0.00370508	0.0048166	0.00815117	0.00703964	0.00666914	0.00889218	0.00703964	0.0129678	0.00889218	0.0118562	0.0174139	0.0218599	0.0251945	0.0507595	0.0815117	0.121526	0.00162792	0.00718231	0.00478821	0.00397587	0.00477962	0.00940601	0.255716	0.935548	0.0616449
TCGA-HC-8257	0.00684932	0.00684932	0.0171233	0.010274	0.00684932	0.00684932	0.0136986	0.00342466	0.010274	0.00684932	0.0136986	0.00342466	0.0171233	0.00684932	0.010274	0.00684932	0.00684932	0.0136986	0.00684932	0.00684932	0.0171233	0.0239726	0.00342466	0.00684932	0.0205479	0.0239726	0.0205479	0.0273973	0.0308219	0.0376712	0.0650685	0.0753425	0.0684932	0	0.0310533	0.0621067	0.030942	0.0154988	0.0152504	0.303369	0.59157	0.726207
TCGA-HC-8258	0.0111111	0.00987654	0.00740741	0.0037037	0.00123457	0.00617284	0.00493827	0.00617284	0.00864198	0.00493827	0.00864198	0.0111111	0.0111111	0.0111111	0.0185185	0.0148148	0.00740741	0.0123457	0.0037037	0.0135802	0.0111111	0.0148148	0.0197531	0.0123457	0.017284	0.0234568	0.017284	0.0234568	0.0382716	0.0382716	0.0481481	0.0666667	0.114815	0.0158424	0.0258874	0.0258874	0.0515892	0.0155046	0.0406828	0.470397	0.687892	0.34365
TCGA-HC-8259	0.00529101	0.0026455	0.00793651	0.00793651	0.00529101	0.010582	0.010582	0.00793651	0.00793651	0.00529101	0.00793651	0.00793651	0.0026455	0.00793651	0.026455	0.0026455	0.0185185	0.0132275	0.00793651	0.021164	0.021164	0.015873	0.0291005	0.0238095	0.026455	0.0238095	0.021164	0.0291005	0.0449735	0.0634921	0.0449735	0.0846561	0.0502646	0.0290044	0.0426554	0.0568739	0.05667	0.0425789	0.0837927	0.263918	0.291699	0.796876
TCGA-HC-8260	0.00990099	0.00990099	0.0231023	0.019802	0.0165017	0	0.0165017	0.0132013	0.00330033	0.0132013	0	0.00660066	0.039604	0.00660066	0.0231023	0.0132013	0.00660066	0.0132013	0.00660066	0.0231023	0.019802	0.00330033	0.0330033	0.0231023	0.0165017	0.019802	0.0231023	0.029703	0.0264026	0.029703	0.029703	0.049505	0.0759076	0.0353478	0.0346562	0.0693124	0.103596	0.0864851	0.0340395	0.389351	0.558635	0.671279
TCGA-HC-8261	0.00497512	0.0066335	0.00414594	0.00331675	0.00912106	0.00746269	0.00414594	0.00497512	0.0066335	0.00331675	0.00746269	0.00331675	0.0066335	0.00414594	0.00829187	0.00497512	0.00912106	0.00746269	0.0140962	0.00995025	0.013267	0.00995025	0.0207297	0.0215589	0.0149254	0.0149254	0.0199005	0.0232172	0.0331675	0.0348259	0.0572139	0.112769	0.140133	0.0197173	0.0161096	0.00966578	0.00642075	0.0160807	0.0284813	0.531943	0.544533	0.109829
TCGA-HC-8262	0.0056338	0.0084507	0.0028169	0	0.0056338	0.0140845	0.0028169	0.0056338	0.0112676	0.0084507	0.0056338	0.0140845	0.0084507	0.0112676	0.0112676	0.0028169	0.0140845	0.0112676	0.0169014	0.0197183	0.0140845	0.0140845	0.0112676	0.0084507	0.0112676	0.028169	0.0169014	0.0394366	0.0338028	0.0478873	0.0732394	0.112676	0.0985915	0.0127831	0.012533	0.025066	0.0249761	0.075063	0.0369299	0.428534	0.428534	0.672475
TCGA-HC-8264	0.0111732	0.00558659	0.00372439	0.00372439	0.00372439	0.00744879	0.0130354	0.00744879	0.00372439	0.00558659	0.00558659	0.00931099	0.0130354	0.0130354	0.00931099	0.00931099	0.00744879	0.0148976	0.0111732	0.0148976	0.0167598	0.027933	0.0242086	0.0130354	0.0242086	0.0297952	0.0372439	0.0391061	0.0670391	0.0614525	0.0689013	0.0968343	0.0577281	0	0.0090337	0.0180674	0.0270039	0.018035	0.0354918	0.273584	0.123554	0.561248
TCGA-HC-8265	0	0.0104167	0.00694444	0.0138889	0	0	0.00694444	0	0.00694444	0.00347222	0	0.00347222	0	0.0104167	0.00347222	0	0.00347222	0.00347222	0.00694444	0.00694444	0.0104167	0.00347222	0.00694444	0.0138889	0.0208333	0.0138889	0.0138889	0.0381944	0.0347222	0.0451389	0.0868056	0.131944	0.201389	0	0.0116432	0	0.0116015	0.0116223	0.0457441	0.659727	0.398111	0.979623
TCGA-HC-8266	0.00595238	0.0119048	0.00595238	0.0178571	0.0238095	0.0178571	0.0119048	0.00595238	0.00595238	0.0119048	0.0178571	0.0238095	0.0119048	0.00595238	0.0178571	0.0178571	0.0178571	0.0238095	0.0178571	0.0119048	0.0297619	0.0178571	0.0238095	0.0297619	0.0297619	0.047619	0.0357143	0.0595238	0.0297619	0.0178571	0.0178571	0.0535714	0.0238095	0.0360482	0.0706857	0	0	0.0352794	0.242997	0.13811	0.207165	0.845684
TCGA-HC-A48F	0.0142096	0.0035524	0.0053286	0.0142096	0.0071048	0.0124334	0.00888099	0.0159858	0.0053286	0.0124334	0.0106572	0.0106572	0.0106572	0.0053286	0.0106572	0.017762	0.0142096	0.0230906	0.0195382	0.0248668	0.0142096	0.017762	0.0195382	0.0142096	0.017762	0.0195382	0.0230906	0.0106572	0.0301954	0.044405	0.0497336	0.0728242	0.0834813	0.0188199	0.0276776	0.0369034	0.00919278	0.0276279	0.0362467	0.423611	0.477689	0.703329
TCGA-HC-A4ZV	0.018315	0.00732601	0.010989	0.014652	0.010989	0.003663	0.010989	0.014652	0.010989	0.00732601	0.010989	0.00732601	0.010989	0.00732601	0.00732601	0.010989	0.00732601	0.010989	0.018315	0.025641	0.010989	0.00732601	0.029304	0.021978	0.010989	0.00732601	0.03663	0.03663	0.0549451	0.021978	0.0512821	0.0915751	0.0659341	0.0764315	0	0.018734	0.0373337	0.0748016	0.0184006	0.329432	0.402639	0.714834
TCGA-HC-A631	0.00442327	0.00442327	0.00476353	0.00578428	0.00306227	0.00578428	0.00510378	0.00408302	0.00442327	0.00544403	0.00476353	0.00544403	0.00442327	0.00408302	0.00816604	0.00680504	0.00952705	0.00850629	0.0105478	0.0129296	0.00884655	0.0159918	0.0149711	0.0098673	0.0248384	0.0204151	0.0248384	0.04049	0.0466145	0.0547805	0.0925485	0.138482	0.111943	0.00704181	0.0110465	0.0124273	0.0165103	0.01654	0.0216998	0.443805	0.176712	0.874659
TCGA-HC-A632	0.00608519	0.0020284	0.0121704	0.0020284	0.00811359	0.0040568	0.00608519	0.00608519	0.0020284	0.00811359	0.0040568	0.00811359	0.0121704	0.010142	0.0141988	0.010142	0.00608519	0.00811359	0.010142	0.00811359	0.0121704	0.0162272	0.0162272	0.0121704	0.0182556	0.0182556	0.0182556	0.0507099	0.0324544	0.0730223	0.0973631	0.119675	0.0912779	0.0088153	0.0259285	0.0259285	0.0258355	0.0172546	0.016978	0.379954	0.151982	0.978396
TCGA-HC-A6AL	0.00833333	0.00595238	0.00357143	0.00357143	0.00357143	0.00357143	0.00595238	0.00357143	0.00238095	0.0047619	0.00119048	0.00714286	0.00238095	0.00357143	0.00952381	0.0047619	0.00595238	0.0130952	0.0107143	0.0154762	0.0130952	0.0190476	0.0214286	0.025	0.0178571	0.0154762	0.0321429	0.0285714	0.0380952	0.05	0.0738095	0.0869048	0.075	0.00877959	0.00430391	0.00860781	0.0257309	0.00859237	0.00845463	0.26489	0.769443	0.466409
TCGA-HC-A6AN	0.00293542	0.00554468	0.00358774	0.00456621	0.00260926	0.00456621	0.00391389	0.00391389	0.00521853	0.00456621	0.00489237	0.00456621	0.00521853	0.00652316	0.00587084	0.00489237	0.00880626	0.00880626	0.00717547	0.0136986	0.0143509	0.0146771	0.0163079	0.0159817	0.0136986	0.0143509	0.0221787	0.0264188	0.047619	0.0482714	0.0763209	0.0945858	0.0998043	0.0088789	0.0186539	0.0161668	0.0111522	0.0111723	0.0244293	0.371761	0.660909	0.670262
TCGA-HC-A6AO	0.0108696	0.00543478	0.00543478	0.00815217	0.00271739	0.013587	0.00543478	0.0217391	0.00271739	0.00815217	0.00815217	0.0244565	0.00543478	0.0163043	0.00543478	0.0163043	0.0108696	0.0108696	0.0190217	0.0244565	0.0163043	0.013587	0.00815217	0.0298913	0.0163043	0.0163043	0.0190217	0.0190217	0.0380435	0.0407609	0.0434783	0.076087	0.100543	0.0145195	0.0427062	0.0427062	0.0425531	0.0426295	0.0279641	0.514558	0.305953	0.295758
TCGA-HC-A6AP	0.0078125	0.003125	0.0046875	0.0046875	0.003125	0.00546875	0.0046875	0.00078125	0.003125	0.00390625	0.00859375	0.00546875	0.00703125	0.00390625	0.00703125	0.00234375	0.00625	0.00859375	0.0078125	0.0078125	0.0140625	0.0125	0.0132812	0.0242188	0.0164063	0.01875	0.0242188	0.0484375	0.0585938	0.0578125	0.107031	0.132812	0.0765625	0.0128169	0.0251322	0.00942458	0.0156513	0.0313589	0.0215994	0.300767	0.122762	0.961012
TCGA-HC-A6AQ	0.00296736	0.0178042	0.00296736	0	0.00296736	0.00593472	0.0118694	0.0118694	0.0118694	0.00593472	0.00296736	0.00296736	0.00593472	0.00593472	0.00890208	0.00593472	0.0148368	0.0178042	0.00890208	0.0118694	0.0267062	0.00890208	0.0118694	0.0178042	0.0178042	0.00890208	0.0385757	0.0563798	0.0445104	0.0474777	0.0623145	0.106825	0.10089	0.0138837	0.0136121	0.0272241	0	0.0135877	0.0534794	0.452133	0.0930862	0.709202
TCGA-HC-A6AS	0.00660066	0.00330033	0.0165017	0.00990099	0.00990099	0.0165017	0.0132013	0.00660066	0.019802	0.019802	0.00990099	0.00660066	0.0132013	0.0132013	0.019802	0.0264026	0.0132013	0.00330033	0.00330033	0.019802	0.00660066	0.0132013	0.0429043	0.0330033	0.019802	0.0462046	0.00990099	0.0330033	0.0660066	0.0330033	0.049505	0.0429043	0.049505	0.0197423	0.038712	0.019356	0.0771464	0.077285	0.0380231	0.283641	0.0945471	0.23503
TCGA-HC-A6HX	0.0142857	0.00952381	0.0142857	0.0190476	0.00952381	0.0047619	0.0238095	0.0047619	0.00952381	0.00952381	0.0190476	0.0190476	0.00952381	0.0142857	0.0142857	0.00952381	0.0142857	0.00952381	0.0047619	0.0142857	0.00952381	0.0333333	0.0238095	0.00952381	0.0428571	0.0428571	0.0142857	0.0333333	0.0380952	0.047619	0.0428571	0.0619048	0.0285714	0	0.0828964	0	0.137665	0.0275825	0.0814212	0.161968	0.242952	0.700341
TCGA-HC-A6HY	0.00833333	0.0166667	0.025	0.025	0.025	0.0166667	0.00833333	0.0166667	0.00833333	0.00833333	0.00833333	0.0166667	0.00833333	0.00833333	0.025	0	0.00833333	0.0166667	0.0166667	0.025	0.00833333	0.0416667	0.00833333	0.00833333	0.025	0	0.0166667	0.0166667	0.05	0.00833333	0.05	0.0583333	0.05	0	0.0434416	0.0434416	0.0865717	0.173455	0.0426686	0.254636	0.594151	0.460645
TCGA-HC-A76W	0.0142566	0.0264766	0.00610998	0.0142566	0.00610998	0.00814664	0.00610998	0.01222	0.0183299	0.0162933	0.0244399	0.0101833	0.00610998	0.00610998	0.0224033	0.01222	0.01222	0.0162933	0.0142566	0.0285132	0.0224033	0.0203666	0.0183299	0.0244399	0.0224033	0.0244399	0.0346232	0.0183299	0.0285132	0.0264766	0.0366599	0.0407332	0.0407332	0.0134014	0.0788351	0.0788351	0.0654604	0.0786937	0.129054	0.256721	0.282393	0.230405
TCGA-HC-A76X	0.00224719	0.0134831	0.0134831	0.00449438	0.00898876	0.011236	0.00674157	0.00898876	0.00898876	0.00674157	0.00449438	0.011236	0.0179775	0.00898876	0.00674157	0.00674157	0.0157303	0.0134831	0.0134831	0.0224719	0.0292135	0.0202247	0.0202247	0.0134831	0.0134831	0.0314607	0.0337079	0.047191	0.0426966	0.0359551	0.0382022	0.0696629	0.0561798	0.0130286	0.0638684	0.0766421	0.0254558	0.127508	0.0501855	0.311974	0.212143	0.931457
TCGA-HC-A8CY	0.0196759	0.00347222	0.0185185	0.0115741	0.00578704	0.0185185	0.0185185	0.0115741	0.0127315	0.0115741	0.0138889	0.0127315	0.0150463	0.00925926	0.0185185	0.0127315	0.0104167	0.0150463	0.0104167	0.0289352	0.0196759	0.0162037	0.0266204	0.0277778	0.0185185	0.0196759	0.0243056	0.025463	0.0451389	0.037037	0.0289352	0.0578704	0.056713	0.0518642	0.123492	0.0944347	0.0579053	0.0652606	0.0856193	0.347734	0.134836	0.633593
TCGA-HC-A8D0	0.00978648	0.00622776	0.0044484	0.00355872	0.00711744	0.0044484	0.0124555	0.0088968	0.0115658	0.0106762	0.0124555	0.0088968	0.00533808	0.00800712	0.0169039	0.0088968	0.0124555	0.0169039	0.0151246	0.0124555	0.0213523	0.0151246	0.019573	0.022242	0.0302491	0.019573	0.0275801	0.0346975	0.0578292	0.0507117	0.0702847	0.0720641	0.0720641	0.00473623	0.041792	0.0278614	0.0231346	0.0463523	0.0775357	0.367451	0.06351	0.340736
TCGA-HC-A8D1	0.00813008	0.00406504	0.00813008	0.00406504	0	0.00813008	0	0.0121951	0.00406504	0.0121951	0	0.00406504	0.00813008	0.00813008	0.0121951	0.00406504	0.00406504	0.00406504	0.0243902	0.0121951	0.0203252	0.0284553	0.0203252	0.0162602	0.0325203	0.0528455	0.0569106	0.0528455	0.0894309	0.0731707	0.0772358	0.0406504	0.0365854	0	0	0	0	0	0.0189858	0.169954	0.0188838	0.970432
TCGA-HC-A9TE	0.0170648	0.00341297	0.0102389	0.0102389	0.0102389	0.0102389	0.0102389	0.00682594	0.0102389	0.0102389	0.0136519	0.0136519	0.00682594	0	0.0136519	0.0102389	0.0170648	0.0170648	0.0170648	0.0307167	0.0238908	0.0170648	0.0307167	0.0341297	0.0273038	0.0273038	0.0375427	0.0341297	0.0273038	0.0375427	0.0477816	0.0546075	0.0375427	0.0413862	0.0202882	0.0405764	0.0606464	0.0202518	0.13949	0.218022	0.138741	0.901594
TCGA-HC-A9TH	0.0188679	0.0102916	0.00857633	0.0137221	0.0102916	0.0154374	0.0102916	0.0137221	0.00857633	0.0154374	0.0120069	0.0205832	0.0222985	0.0154374	0.0205832	0.0120069	0.00686106	0.0154374	0.0205832	0.0291595	0.0188679	0.0154374	0.025729	0.0291595	0.0360206	0.025729	0.0360206	0.0360206	0.0668954	0.0343053	0.0411664	0.0240137	0.0308748	0.0326056	0.0532794	0.0639353	0.0530884	0.0319103	0.136061	0.187381	0.156151	0.883506
TCGA-HI-7168	0.00878906	0.0078125	0.00585938	0.000976562	0.00390625	0.00292969	0.00390625	0.0117188	0.00390625	0.00585938	0.00585938	0.0107422	0.00292969	0.00976562	0.00976562	0.00585938	0.00488281	0.00585938	0.0078125	0.00585938	0.0205078	0.0078125	0.0146484	0.00585938	0.00683594	0.00878906	0.00488281	0.0185547	0.0224609	0.0166016	0.046875	0.116211	0.157227	0.00867301	0.00850332	0.0170066	0.0197699	0.0113174	0.019488	0.445816	0.791947	0.158951
TCGA-HI-7169	0.00262123	0.00393185	0.00655308	0.00131062	0.0078637	0.00655308	0.00917431	0.0117955	0.00524246	0.00131062	0.00917431	0.00655308	0.00524246	0.00393185	0.00655308	0.00524246	0.00655308	0.00655308	0.0104849	0.00917431	0.0117955	0.00917431	0.0144168	0.017038	0.00917431	0.0131062	0.017038	0.0288336	0.0262123	0.0301442	0.0498034	0.08519	0.12713	0.00807802	0.0158399	0.00791996	0.0197289	0.0158115	0.0233371	0.375256	0.843359	0.887246
TCGA-HI-7170	0.0012987	0.0038961	0.00649351	0.00519481	0.00779221	0.0038961	0.0038961	0.00649351	0.00519481	0.0103896	0.00909091	0.0103896	0.00909091	0.012987	0.00519481	0.00779221	0.00519481	0.012987	0.0116883	0.0207792	0.00519481	0.00909091	0.0103896	0.012987	0.0116883	0.0103896	0.0207792	0.0220779	0.0493506	0.0376623	0.0519481	0.11039	0.148052	0.0149624	0.0244494	0.0195595	0.014617	0.0146433	0.0144086	0.544585	0.573248	0.535947
TCGA-HI-7171	0.00601375	0.00429553	0.00429553	0.00773196	0.00687285	0.00601375	0.00515464	0.0103093	0.00859107	0.00773196	0.00601375	0.0111684	0.0111684	0.00687285	0.0111684	0.00773196	0.00429553	0.0103093	0.00945017	0.0111684	0.0146048	0.0120275	0.0197595	0.0146048	0.0154639	0.00859107	0.0197595	0.0352234	0.0429553	0.0438144	0.0678694	0.104811	0.13488	0.00731584	0.010759	0.010759	0.0214409	0.042959	0.0281802	0.550066	0.46598	0.606914
TCGA-J4-8198	0.0098912	0.0124629	0.0090999	0.0102868	0.00613254	0.00791296	0.0126607	0.0090999	0.00771513	0.010089	0.010089	0.0098912	0.0102868	0.0126607	0.00969337	0.0122651	0.0122651	0.013452	0.0136499	0.0158259	0.0174085	0.016815	0.0183976	0.0158259	0.0227498	0.0205737	0.0221563	0.023541	0.0336301	0.0334322	0.0423343	0.0605341	0.0779426	0.0238419	0.0374007	0.0448808	0.0400616	0.0298669	0.0495924	0.359897	0.696045	0.620824
TCGA-J4-8200	0.00373354	0.00412655	0.00137552	0.00353704	0.00117901	0.00373354	0.00373354	0.00353704	0.00157202	0.00353704	0.00373354	0.00550206	0.00412655	0.00451955	0.00569857	0.00353704	0.00314404	0.00707408	0.00825309	0.00982511	0.00766359	0.00962861	0.0133622	0.0123796	0.0165062	0.0145412	0.0149342	0.0279033	0.043427	0.0455885	0.0742779	0.127333	0.169188	0.00670626	0.00854755	0.00723255	0.0117926	0.00853222	0.0142077	0.55305	0.585809	0.097017
TCGA-J4-A67K	0.00238596	0.00533333	0.00322807	0.00421053	0.00308772	0.00378947	0.00378947	0.00364912	0.00364912	0.00477193	0.00336842	0.00364912	0.00421053	0.00449123	0.00547368	0.00435088	0.00364912	0.00561404	0.00463158	0.00870175	0.0085614	0.00926316	0.00898246	0.0109474	0.0144561	0.0117895	0.013193	0.0232982	0.0314386	0.0324211	0.0579649	0.114526	0.170667	0.00546534	0.00700714	0.0131899	0.0110891	0.00781746	0.0149794	0.489653	0.751795	0.468489
TCGA-J4-A67L	0.00367371	0.00367371	0.00333973	0.00325624	0.00292227	0.00409117	0.00392419	0.00342323	0.00267179	0.00367371	0.00409117	0.0037572	0.00333973	0.00333973	0.00442515	0.00233781	0.00267179	0.00526008	0.00409117	0.00542707	0.00667947	0.00617851	0.00776488	0.00801536	0.00985222	0.00684646	0.0112716	0.0172831	0.0236286	0.0273858	0.0531853	0.115722	0.207648	0.00483182	0.00796724	0.0083979	0.007295	0.0107472	0.00994045	0.523173	0.77098	0.0634541
TCGA-J4-A67M	0.00493827	0.00448934	0.00606061	0.00561167	0.00650954	0.00426487	0.00493827	0.00538721	0.0047138	0.00561167	0.00448934	0.00538721	0.00628507	0.00493827	0.00583614	0.00538721	0.00718294	0.00875421	0.00695847	0.00763187	0.0112233	0.00740741	0.0132435	0.0103255	0.0130191	0.00920314	0.0118967	0.013468	0.0208754	0.0217733	0.0410774	0.0945006	0.171044	0.0126648	0.0142795	0.0130378	0.0142283	0.0130144	0.018294	0.462172	0.821842	0.195659
TCGA-J4-A67N	0.00262166	0.00360478	0.00245781	0.00507947	0.00180239	0.00409635	0.00442405	0.00376864	0.00344093	0.00393249	0.00409635	0.00344093	0.00475176	0.00294937	0.00540718	0.00327708	0.00688186	0.00622645	0.00507947	0.00688186	0.00884811	0.00606259	0.0085204	0.00573488	0.00868425	0.0124529	0.0117975	0.0185155	0.0267082	0.028019	0.0466983	0.0932328	0.15648	0.0029125	0.0065269	0.00856656	0.00812938	0.00529359	0.0132222	0.380586	0.871563	0.0902309
TCGA-J4-A67Q	0.00390426	0.00305551	0.00203701	0.00305551	0.0016975	0.00288576	0.00373451	0.00254626	0.0016975	0.00305551	0.00390426	0.00509251	0.00373451	0.00356476	0.00475301	0.00373451	0.00322526	0.00424376	0.00662027	0.00695977	0.00763877	0.00628077	0.010185	0.00848752	0.010864	0.0110338	0.0140893	0.0212188	0.0280088	0.0366661	0.0614497	0.120014	0.201664	0.0044233	0.00722792	0.00530047	0.00720201	0.00721495	0.00946573	0.559244	0.700467	0.186073
TCGA-J4-A67R	0.00472932	0.00311934	0.00362246	0.00382371	0.00362246	0.00352184	0.00402495	0.0046287	0.0046287	0.00513182	0.00503119	0.00563494	0.00503119	0.00493057	0.00623868	0.00513182	0.00734554	0.00774804	0.00714429	0.0100624	0.012578	0.010163	0.0139867	0.00965989	0.0171061	0.0142886	0.0191185	0.0239485	0.034514	0.0356208	0.0609781	0.114912	0.155162	0.00380798	0.0142551	0.0145945	0.00980751	0.0159235	0.0260026	0.511291	0.672768	0.310512
TCGA-J4-A67S	0.00224058	0.00322084	0.00252066	0.00336087	0.00182047	0.00336087	0.00280073	0.00378098	0.00322084	0.00434113	0.00434113	0.00350091	0.00504131	0.00420109	0.00448117	0.00434113	0.00476124	0.00574149	0.00546142	0.00644167	0.00868226	0.00658171	0.00896233	0.00840218	0.011623	0.0102227	0.0141437	0.0198852	0.0249265	0.0281473	0.0490127	0.109088	0.201372	0.00271999	0.00723838	0.00685741	0.00835123	0.00494369	0.013845	0.535192	0.751799	0.232556
TCGA-J4-A67T	0.00370462	0.00222277	0.00246975	0.00271672	0.00222277	0.00148185	0.00345764	0.00271672	0.000740924	0.00246975	0.00246975	0.00123487	0.00321067	0.00321067	0.00271672	0.00246975	0.00321067	0.00148185	0.00321067	0.00444554	0.00469252	0.00419857	0.00716226	0.00716226	0.00864411	0.00987898	0.0108669	0.0148185	0.0244505	0.0239565	0.0521116	0.117066	0.210669	0.00297964	0.0017528	0.00292134	0.00698607	0.00466575	0.00688644	0.486882	0.807665	0.080623
TCGA-J4-A6G1	0.00284726	0.00467765	0.00305064	0.00589791	0.00386414	0.00447427	0.00366077	0.00549115	0.00406752	0.0042709	0.0042709	0.00630466	0.00589791	0.00305064	0.00650803	0.00284726	0.00467765	0.0093553	0.00650803	0.0105756	0.0107789	0.00894855	0.0140329	0.0124059	0.0152532	0.0170836	0.0166768	0.025422	0.0423022	0.0392516	0.0744356	0.115314	0.145617	0.0093663	0.0105958	0.0141278	0.0112617	0.0169229	0.0256712	0.494105	0.644545	0.790871
TCGA-J4-A6G3	0.00773548	0.00621872	0.00561201	0.00834218	0.00561201	0.00637039	0.00773548	0.00788715	0.00637039	0.00682542	0.00894889	0.00985894	0.00637039	0.00591536	0.010314	0.00743212	0.00940391	0.0106173	0.0116791	0.0136508	0.0118307	0.0141059	0.0162293	0.0144092	0.0177461	0.0200212	0.0189595	0.0242682	0.0335204	0.0354922	0.0544517	0.0876687	0.112847	0.018002	0.0304306	0.0194756	0.0218315	0.0297684	0.0334757	0.44236	0.694458	0.786304
TCGA-J4-A6M7	0.00273691	0.00752651	0.0047896	0.00410537	0.00307903	0.00444749	0.00547383	0.00513171	0.0023948	0.0047896	0.00684229	0.00615806	0.00855286	0.00513171	0.00513171	0.0106055	0.00684229	0.011974	0.00752651	0.0130003	0.0133425	0.011974	0.0123161	0.0102634	0.0205269	0.015053	0.0191584	0.0307903	0.0352378	0.0413958	0.0759494	0.102634	0.140951	0.00268906	0.0158187	0.0105458	0.015762	0.0171061	0.02719	0.530577	0.548607	0.255008
TCGA-J4-A83I	0.00438212	0.0037561	0.00237887	0.00275448	0.00200326	0.0035057	0.00300488	0.00400651	0.00313009	0.00275448	0.00212846	0.00212846	0.0037561	0.00388131	0.00388131	0.00287968	0.00325529	0.00400651	0.00262927	0.00550895	0.00488293	0.00400651	0.00626017	0.00500814	0.00638538	0.00663578	0.0071366	0.0108927	0.0174033	0.0164017	0.0302992	0.0637286	0.132841	0.00233823	0.00481421	0.00550196	0.00593909	0.00503441	0.00472854	0.237621	0.959442	0.0664925
TCGA-J4-A83J	0.0069321	0.00479915	0.00604337	0.00604337	0.00497689	0.00533239	0.00622112	0.00639886	0.00515464	0.00604337	0.00586562	0.00551013	0.00710985	0.00515464	0.00764309	0.00675435	0.00497689	0.00853182	0.00657661	0.00870956	0.00906506	0.00746534	0.00959829	0.00799858	0.0122645	0.0106648	0.0138642	0.0159972	0.0218628	0.0255954	0.0533239	0.102382	0.176502	0.012015	0.015528	0.015528	0.0128047	0.0138967	0.0163036	0.519435	0.751166	0.0945531
TCGA-J4-A83K	0.00294118	0.00330882	0.00441176	0.00294118	0.00441176	0.00257353	0.00330882	0.00625	0.00147059	0.00404412	0.00661765	0.00441176	0.00661765	0.00441176	0.00514706	0.00477941	0.00588235	0.00698529	0.00551471	0.00772059	0.00919118	0.00661765	0.00882353	0.0113971	0.0117647	0.0125	0.0154412	0.0238971	0.0290441	0.0356618	0.0636029	0.102941	0.195221	0.0115214	0.00677761	0.00338881	0.00787887	0.0101482	0.024409	0.58598	0.675367	0.193956
TCGA-J4-A83L	0.000948407	0.00113809	0.00132777	0.000948407	0.000379363	0.00132777	0.00246586	0.00132777	0.000758725	0.00113809	0.00151745	0.000948407	0.00151745	0.000948407	0.00113809	0.00170713	0.00113809	0.00189681	0.00246586	0.00417299	0.00322458	0.00341426	0.00455235	0.00436267	0.00550076	0.00701821	0.00891502	0.0117602	0.0218134	0.0231411	0.0440061	0.119879	0.204666	0.000399503	0.00156674	0.000391686	0.00234169	0.00195492	0.00615546	0.412879	0.865936	0.0228888
TCGA-J4-A83M	0.00450919	0.00381547	0.0062435	0.00450919	0.00312175	0.00520291	0.00450919	0.0062435	0.00277489	0.00520291	0.00312175	0.00589664	0.00693722	0.00589664	0.00693722	0.00589664	0.00485605	0.00901838	0.00554977	0.00971211	0.00971211	0.00832466	0.0128339	0.00971211	0.0128339	0.014915	0.0169962	0.0260146	0.0332986	0.0339924	0.0475199	0.121748	0.178633	0.00702856	0.0160791	0.0114851	0.0148771	0.0137574	0.0214333	0.577835	0.630569	0.2241
TCGA-J4-A83N	0.0030025	0.00183486	0.00166806	0.00200167	0.00133445	0.00216847	0.00133445	0.00266889	0.00216847	0.00216847	0.00216847	0.00266889	0.00250209	0.00183486	0.0030025	0.00233528	0.00250209	0.00333611	0.00250209	0.00517098	0.00433695	0.00366972	0.00683903	0.00633862	0.00767306	0.00834028	0.00850709	0.0153461	0.0235196	0.0245204	0.0473728	0.0902419	0.176647	0.00143722	0.00422731	0.00281821	0.00175506	0.00421972	0.00795816	0.364453	0.898915	0.114589
TCGA-J4-AATV	0.00478261	0.0026087	0.00326087	0.00173913	0.0026087	0.00304348	0.00326087	0.00369565	0.0023913	0.00413043	0.00434783	0.00543478	0.00717391	0.00456522	0.00608696	0.00478261	0.00521739	0.00521739	0.00630435	0.00956522	0.00934783	0.00652174	0.0106522	0.0076087	0.0115217	0.01	0.0143478	0.0191304	0.0315217	0.0291304	0.0547826	0.106304	0.183913	0.00314952	0.00679337	0.0086461	0.00738438	0.00616471	0.0139515	0.510418	0.75718	0.0991975
TCGA-J4-AATZ	0.00355677	0.00109439	0.00273598	0.00246238	0.00191518	0.00109439	0.00246238	0.00328317	0.00164159	0.00273598	0.00355677	0.00300958	0.00519836	0.00300958	0.00492476	0.00164159	0.00273598	0.00547196	0.00410397	0.00629275	0.00738714	0.00766074	0.00820793	0.00957592	0.0120383	0.0139535	0.0147743	0.022435	0.0352941	0.0361149	0.0659371	0.130233	0.206293	0.0063831	0.00469366	0.00391138	0.0054563	0.0117131	0.0153671	0.576228	0.664114	0.674902
TCGA-J4-AAU2	0.000935673	0.00116959	0.000233918	0.000935673	0.000233918	0.00140351	0.00116959	0.00140351	0.00140351	0.00163743	0.00187135	0.00140351	0.00327485	0.00163743	0.00187135	0.00140351	0.00187135	0.00187135	0.00210526	0.00327485	0.00233918	0.00327485	0.00491228	0.00467836	0.00444444	0.00538012	0.00795322	0.0121637	0.0236257	0.0252632	0.0594152	0.11883	0.213801	0.00103012	0.00151494	0.00151494	0.00201268	0.0020163	0.00446395	0.450904	0.837181	0.0749895
TCGA-KK-A59V	0.0035524	0.00507485	0.00405988	0.00405988	0.00329866	0.00456737	0.00405988	0.00456737	0.0035524	0.00380614	0.00507485	0.00558234	0.00583608	0.00405988	0.00558234	0.00482111	0.00761228	0.00964222	0.00685105	0.0071048	0.0111647	0.00938848	0.0170008	0.0126871	0.0182695	0.0180157	0.0220756	0.0279117	0.0400913	0.0449125	0.0654656	0.114692	0.119513	0.00565624	0.0166367	0.00646983	0.0119723	0.0221425	0.0208797	0.425283	0.656435	0.621734
TCGA-KK-A59X	0.0086512	0.00924105	0.00570193	0.00511207	0.00629178	0.00688164	0.00825796	0.00904444	0.00530869	0.0100275	0.0106174	0.010814	0.0110106	0.00845458	0.0114039	0.00786473	0.00943767	0.00943767	0.0127802	0.0145497	0.0159261	0.0145497	0.017499	0.0145497	0.0212348	0.017499	0.019072	0.0202517	0.0393236	0.0342116	0.0511207	0.0821864	0.102045	0.0140503	0.0292727	0.0344385	0.0394623	0.0317984	0.0346713	0.43653	0.643441	0.827911
TCGA-KK-A59Y	0.00908575	0.00397501	0.00340716	0.00539466	0.0048268	0.00795003	0.00653038	0.00795003	0.00454287	0.00624645	0.00738217	0.00681431	0.00681431	0.00795003	0.00823396	0.00567859	0.00596252	0.0076661	0.011925	0.0153322	0.0150483	0.0116411	0.0193072	0.0144804	0.0227144	0.0218626	0.0272572	0.0306644	0.048268	0.0454287	0.0749574	0.0951164	0.0988075	0.0140767	0.0213293	0.0213293	0.00875117	0.0263007	0.0369702	0.42655	0.485385	0.652274
TCGA-KK-A59Z	0.00209534	0.00340492	0.000785752	0.00366684	0.00235726	0.00235726	0.00340492	0.00288109	0.00314301	0.00392876	0.00314301	0.00419068	0.00497643	0.00288109	0.00392876	0.00288109	0.00366684	0.00523834	0.00366684	0.00785752	0.00680985	0.00628601	0.0091671	0.00628601	0.0091671	0.00680985	0.0112624	0.0162389	0.0343112	0.031692	0.0531692	0.107386	0.158198	0.00534595	0.00262067	0.00589652	0.00848666	0.0117719	0.0109397	0.386592	0.854471	0.598239
TCGA-KK-A6DY	0.00456837	0.00551355	0.00441084	0.00425331	0.00362319	0.00598614	0.00771897	0.00693132	0.0047259	0.00598614	0.00677379	0.00834909	0.00834909	0.00677379	0.00771897	0.00708885	0.00960933	0.0114997	0.00992439	0.0124449	0.010712	0.00976686	0.0135476	0.0124449	0.0152804	0.0126024	0.0159105	0.023472	0.0311909	0.0293006	0.0516698	0.0874291	0.11736	0.0104624	0.0167363	0.0199756	0.0231316	0.0210175	0.0296953	0.392931	0.795884	0.147132
TCGA-KK-A6E0	0.00603926	0.0070458	0.00251636	0.00452944	0.00578762	0.00654253	0.00754907	0.00553598	0.00528435	0.00603926	0.0070458	0.00830398	0.00578762	0.00805234	0.00931052	0.0070458	0.0078007	0.00754907	0.0103171	0.0118269	0.0108203	0.0133367	0.0145949	0.0145949	0.0228988	0.018621	0.0193759	0.0276799	0.0405133	0.0362355	0.0583795	0.0931052	0.127076	0.0108802	0.0223044	0.0126069	0.0260896	0.0164563	0.0238125	0.478429	0.662222	0.539123
TCGA-KK-A6E3	0.00516212	0.00564607	0.00451686	0.00371028	0.00532344	0.0069366	0.00403291	0.00725924	0.00467817	0.00500081	0.00500081	0.00742055	0.00613002	0.00467817	0.00532344	0.00645265	0.00645265	0.00838845	0.00871108	0.0100016	0.0117761	0.0104856	0.0146798	0.0120987	0.0159703	0.0111308	0.0174222	0.0221003	0.028069	0.0266172	0.0472657	0.0909824	0.130828	0.0048969	0.0110425	0.0110425	0.0129165	0.0148567	0.0207488	0.380385	0.84285	0.375915
TCGA-KK-A6E4	0.00247902	0.00228833	0.00133486	0.00228833	0.00286041	0.00381388	0.0032418	0.00190694	0.00152555	0.00228833	0.00305111	0.00514874	0.00228833	0.00305111	0.00457666	0.0032418	0.00476735	0.00286041	0.00743707	0.00724638	0.0097254	0.00896262	0.011251	0.00858124	0.0116323	0.0122044	0.0120137	0.016209	0.0329901	0.0314645	0.0553013	0.0980168	0.146834	0.0029946	0.00734003	0.00538269	0.00633855	0.00781531	0.0110544	0.368095	0.860482	0.548408
TCGA-KK-A6E5	0.00632782	0.00591958	0.00510308	0.00387834	0.00428659	0.00632782	0.00551133	0.00653195	0.00449071	0.0061237	0.00510308	0.00489896	0.00571545	0.00632782	0.00734844	0.00775669	0.00836905	0.010002	0.00653195	0.0106144	0.0151051	0.0106144	0.0138804	0.0118392	0.0175546	0.016534	0.0224536	0.0228618	0.0369463	0.0277608	0.061237	0.0959379	0.128802	0.0119581	0.018319	0.0175862	0.0182533	0.0168232	0.0309479	0.451704	0.714422	0.45083
TCGA-KK-A6E6	0.00275138	0.00550275	0.0050025	0.00450225	0.00250125	0.00450225	0.00250125	0.004002	0.00425213	0.0050025	0.00475238	0.004002	0.0070035	0.00450225	0.00575288	0.00525263	0.00675338	0.0090045	0.00750375	0.0107554	0.0105053	0.00925463	0.0155078	0.010005	0.0162581	0.0162581	0.0165083	0.0267634	0.04002	0.0422711	0.0725363	0.121061	0.156328	0.0118421	0.0125035	0.0133966	0.0106789	0.0169386	0.020176	0.545315	0.563638	0.540985
TCGA-KK-A6E7	0.00344065	0.00294913	0.00393217	0.00319489	0.00368641	0.00491521	0.00270337	0.00466945	0.00516097	0.00466945	0.00417793	0.00540673	0.00565249	0.00540673	0.00663554	0.00786434	0.0068813	0.00761858	0.00614402	0.0103219	0.0115507	0.00884738	0.0137626	0.0125338	0.0117965	0.0176948	0.0159744	0.0216269	0.0294913	0.0282625	0.0545589	0.093389	0.156304	0.00463659	0.00909175	0.0121223	0.0113239	0.010588	0.0208366	0.470745	0.774213	0.413582
TCGA-KK-A6E8	0.00155545	0.00186654	0.00108882	0.00186654	0.00031109	0.00186654	0.00233318	0.00388863	0.00124436	0.00295536	0.00186654	0.00357754	0.00373308	0.00186654	0.00357754	0.00435527	0.00279981	0.00373308	0.00559963	0.00746617	0.00746617	0.00668844	0.00979935	0.00871053	0.0115103	0.0139991	0.0172655	0.0203764	0.0354643	0.0368642	0.0692176	0.121636	0.170166	0.00310102	0.00651503	0.00390902	0.00389501	0.0069369	0.0102386	0.4642	0.757402	0.549818
TCGA-KK-A7AP	0.00378558	0.00242277	0.00211993	0.00272562	0.00136281	0.00211993	0.00317989	0.00333131	0.00181708	0.00348274	0.00408843	0.00469412	0.00348274	0.00348274	0.00529982	0.00529982	0.00484555	0.00605694	0.00757117	0.00802544	0.00938825	0.0090854	0.0113568	0.00999394	0.0127196	0.0149909	0.017868	0.0211993	0.0339188	0.0348274	0.0586008	0.098728	0.110993	0.00375437	0.00777081	0.00899778	0.008558	0.00898164	0.00843595	0.292873	0.874624	0.381665
TCGA-KK-A7AQ	0.00132953	0.0017094	0.0022792	0.00151947	0.00132953	0.000759734	0.0022792	0.00208927	0.0017094	0.00208927	0.00208927	0.0034188	0.00265907	0.00189934	0.00379867	0.00246914	0.0039886	0.0045584	0.00493827	0.00721747	0.0104463	0.00683761	0.0112061	0.00873694	0.0169041	0.0151947	0.0191833	0.0290598	0.037227	0.0474834	0.0700855	0.109212	0.138272	0.00398599	0.00223314	0.00446629	0.00333771	0.00445827	0.0142571	0.397055	0.778839	0.107789
TCGA-KK-A7AU	0.00577137	0.00488346	0.00510544	0.00843507	0.00665927	0.00665927	0.0082131	0.00799112	0.00577137	0.00932297	0.00954495	0.0126526	0.009101	0.00688124	0.0126526	0.00799112	0.00799112	0.0108768	0.00954495	0.0117647	0.0170921	0.0133185	0.0153163	0.0142064	0.0162042	0.0137625	0.0155383	0.0250832	0.0281909	0.0319645	0.0357381	0.063485	0.0863485	0.0121843	0.0231452	0.0223985	0.026038	0.0208678	0.0256666	0.283734	0.875271	0.446618
TCGA-KK-A7AV	0.0039132	0.00675916	0.00569192	0.00355745	0.0039132	0.00462469	0.00604767	0.00533618	0.0039132	0.0039132	0.00320171	0.00498043	0.00604767	0.00569192	0.00498043	0.00533618	0.00889363	0.00533618	0.00498043	0.00924938	0.00996087	0.0128068	0.0156528	0.0117396	0.0188545	0.0163643	0.0188545	0.0288154	0.0430452	0.0387762	0.0594095	0.104589	0.15297	0.00757982	0.0086701	0.0173402	0.0246829	0.0148364	0.0243309	0.520304	0.654616	0.259833
TCGA-KK-A7AW	0.00329114	0.00481013	0.00531646	0.0035443	0.00329114	0.00708861	0.00506329	0.00455696	0.0035443	0.00556962	0.00455696	0.00506329	0.00632911	0.00607595	0.00582278	0.00481013	0.00708861	0.00734177	0.0106329	0.0113924	0.0131646	0.0103797	0.0189873	0.0139241	0.0197468	0.0151899	0.0220253	0.0306329	0.0473418	0.0410127	0.0650633	0.105316	0.130127	0.00682062	0.015285	0.0114637	0.0123745	0.0171647	0.0253344	0.479701	0.615025	0.558344
TCGA-KK-A7AY	0.00187077	0.00172687	0.00143906	0.00158296	0.000431717	0.00201468	0.00374155	0.00215858	0.0025903	0.00287811	0.0025903	0.00374155	0.00172687	0.00287811	0.00215858	0.00273421	0.00316592	0.00316592	0.00345373	0.00489279	0.00575622	0.00546841	0.007627	0.00676356	0.0100734	0.00978558	0.0103612	0.016837	0.0231688	0.0257591	0.0456181	0.0874946	0.135415	0.00150877	0.0017751	0.00325435	0.00501141	0.00324851	0.00871755	0.271972	0.933259	0.200785
TCGA-KK-A7AZ	0.00380048	0.00459224	0.00332542	0.00380048	0.00443389	0.00522565	0.00570071	0.00554236	0.00364212	0.00490895	0.00633413	0.00696754	0.0050673	0.00538401	0.00680918	0.00665083	0.00712589	0.00981789	0.00886778	0.0118765	0.0104513	0.0101346	0.0120348	0.0136184	0.0152019	0.0153603	0.0186857	0.0193191	0.0308789	0.031829	0.0435471	0.0728424	0.111481	0.00743946	0.0127643	0.00820564	0.013627	0.0150167	0.020149	0.313527	0.884468	0.186814
TCGA-KK-A7B0	0.00749625	0.00549725	0.00574713	0.00449775	0.003998	0.00649675	0.0089955	0.0049975	0.00324838	0.0069965	0.00449775	0.00849575	0.00949525	0.00574713	0.00849575	0.00874563	0.0089955	0.0109945	0.00849575	0.0142429	0.0124938	0.0162419	0.0172414	0.011994	0.0187406	0.0209895	0.0227386	0.0289855	0.0427286	0.0387306	0.061969	0.0962019	0.097951	0.0154072	0.0261833	0.0181269	0.0190654	0.0170892	0.0346196	0.385656	0.672931	0.259644
TCGA-KK-A7B1	0.00665093	0.0055782	0.0055782	0.00536366	0.00493456	0.00750912	0.00729457	0.00643639	0.00450547	0.00622184	0.0087964	0.00708003	0.00986913	0.00600729	0.00922549	0.00793821	0.00793821	0.00986913	0.0087964	0.0100837	0.0111564	0.0105128	0.0188801	0.0111564	0.016091	0.0197383	0.0175928	0.0225274	0.0388329	0.0336838	0.0630766	0.0944003	0.124008	0.0184863	0.0205961	0.0164769	0.0172387	0.0205592	0.0347949	0.465196	0.665601	0.343422
TCGA-KK-A7B2	0.00303783	0.00441867	0.00359017	0.0024855	0.00359017	0.004971	0.00359017	0.0074565	0.00635184	0.004971	0.004971	0.00800884	0.00607567	0.0057995	0.00441867	0.0041425	0.00524717	0.0110467	0.00552334	0.00856117	0.0138083	0.0127037	0.0179508	0.0157415	0.0168462	0.0146368	0.0190555	0.0251312	0.0394919	0.0353494	0.0582712	0.0905827	0.13256	0.010587	0.0160417	0.0122672	0.0112829	0.0169548	0.0240977	0.442491	0.746704	0.276481
TCGA-KK-A7B3	0.00300558	0.00257621	0.00300558	0.00300558	0.00214684	0.00386432	0.00450837	0.004079	0.0027909	0.00364964	0.00386432	0.00536711	0.00386432	0.00193216	0.00665522	0.00343495	0.00214684	0.00429369	0.0027909	0.00880206	0.00622585	0.00837269	0.011593	0.00837269	0.00944611	0.011593	0.0139545	0.0199657	0.0257621	0.0276943	0.0502362	0.0897381	0.152641	0.00378978	0.00690046	0.00636965	0.00423121	0.00741793	0.0119913	0.368695	0.877919	0.323906
TCGA-KK-A7B4	0.00666532	0.00525146	0.00363563	0.00504948	0.00666532	0.00626136	0.0068673	0.00949303	0.00646334	0.00727126	0.00767522	0.00605938	0.00807918	0.00727126	0.00888709	0.00706928	0.0078772	0.010099	0.0078772	0.0129267	0.0123207	0.0123207	0.0155524	0.0137346	0.0155524	0.0147445	0.0183801	0.0240355	0.0284791	0.0337306	0.0458493	0.0830135	0.0939204	0.0110583	0.0176181	0.0223615	0.0236317	0.0202921	0.0306158	0.307824	0.845357	0.734935
TCGA-KK-A8I4	0.00486044	0.0045827	0.00388835	0.00402722	0.00486044	0.00624913	0.00472157	0.00555478	0.00597139	0.00527704	0.00597139	0.00694348	0.00722122	0.00624913	0.00916539	0.00652687	0.00819331	0.00999861	0.00930426	0.012776	0.012776	0.0137481	0.0183308	0.0155534	0.020275	0.0172198	0.022358	0.0316623	0.0374948	0.0334676	0.0609638	0.0942925	0.111373	0.00936249	0.0194385	0.0172787	0.022597	0.0215596	0.0307603	0.423056	0.685224	0.347268
TCGA-KK-A8I5	0.00991597	0.00773109	0.00638655	0.010084	0.00857143	0.00840336	0.00991597	0.0097479	0.00890756	0.0102521	0.0119328	0.012605	0.00957983	0.00840336	0.0142857	0.00840336	0.00857143	0.0114286	0.00957983	0.0115966	0.0104202	0.0109244	0.0134454	0.0129412	0.0136134	0.012605	0.0132773	0.0154622	0.022521	0.0252101	0.030084	0.0522689	0.0786555	0.0167627	0.0277336	0.0200298	0.0225167	0.0292218	0.0332934	0.234812	0.92219	0.122558
TCGA-KK-A8I6	0.00416259	0.00563173	0.00636631	0.00563173	0.0046523	0.00685602	0.00391773	0.00489716	0.00538688	0.00636631	0.00612145	0.00661117	0.00710088	0.00587659	0.00783546	0.00587659	0.00734574	0.0122429	0.00857003	0.0110186	0.0208129	0.0142018	0.0210578	0.013712	0.0203232	0.0183643	0.0235064	0.0279138	0.0386876	0.0401567	0.053379	0.0812929	0.101126	0.0115147	0.0178748	0.016934	0.0187481	0.0215991	0.024949	0.379578	0.73526	0.493333
TCGA-KK-A8I7	0.0074796	0.00679964	0.00679964	0.00634633	0.00453309	0.00611967	0.00883953	0.00430644	0.0049864	0.00770626	0.00543971	0.00883953	0.00861287	0.00566636	0.00906618	0.00475975	0.0074796	0.00793291	0.00861287	0.0106528	0.0126927	0.0106528	0.0142792	0.0156392	0.018359	0.0151859	0.0192656	0.0247053	0.0376247	0.0344515	0.0473708	0.0788758	0.0967815	0.0131808	0.0193843	0.0153459	0.0249483	0.031443	0.0325256	0.336923	0.810351	0.408471
TCGA-KK-A8I8	0.00892857	0.00755495	0.00858516	0.00721154	0.00789835	0.00549451	0.00755495	0.00961538	0.00652473	0.00652473	0.0120192	0.00721154	0.00927198	0.00652473	0.0123626	0.0113324	0.00686813	0.00892857	0.00927198	0.0161401	0.0157967	0.010989	0.0233516	0.0182005	0.018544	0.0182005	0.0216346	0.0254121	0.0315934	0.0339973	0.0487637	0.0779533	0.0968407	0.0114134	0.0223802	0.034969	0.0334499	0.0321138	0.0398422	0.38535	0.737905	0.297075
TCGA-KK-A8I9	0.00325203	0.00216802	0.00271003	0.00352304	0.00162602	0.00189702	0.00298103	0.00243902	0.00352304	0.00460705	0.00460705	0.00542005	0.00325203	0.00271003	0.00650407	0.00243902	0.00433604	0.00623306	0.00596206	0.0097561	0.00921409	0.00867209	0.0105691	0.00623306	0.0119241	0.0132791	0.0170732	0.0203252	0.0289973	0.0344173	0.0588076	0.104065	0.15935	0.00300237	0.00588725	0.00735906	0.00513287	0.00661127	0.015179	0.422729	0.820296	0.119692
TCGA-KK-A8IA	0.00502176	0.00552394	0.0063609	0.00502176	0.0041848	0.00485437	0.00552394	0.00451958	0.00502176	0.0063609	0.00585872	0.00468698	0.00770003	0.0063609	0.00686307	0.00786743	0.00786743	0.0083696	0.0063609	0.00937395	0.0125544	0.00937395	0.0157349	0.0120522	0.0159022	0.0150653	0.0202544	0.0215936	0.0378306	0.0398393	0.0570807	0.106629	0.130733	0.00851249	0.0113266	0.0160957	0.019602	0.017257	0.0216646	0.454843	0.702356	0.812057
TCGA-KK-A8IB	0.00263803	0.00207273	0.00358018	0.00263803	0.00131901	0.00376861	0.00358018	0.00546448	0.00320332	0.00395704	0.00376861	0.00584134	0.00584134	0.00489919	0.00358018	0.00489919	0.00527605	0.00489919	0.0062182	0.00753721	0.00678349	0.00791408	0.00960995	0.00640663	0.00979838	0.0113058	0.013567	0.0177125	0.0199736	0.0239307	0.0373092	0.0768796	0.110232	0.0059517	0.00625205	0.00583525	0.00498371	0.0108174	0.00941589	0.238205	0.941824	0.348095
TCGA-KK-A8IC	0.00513067	0.00416867	0.00416867	0.00625301	0.00481	0.00448934	0.00497034	0.00545134	0.002886	0.00513067	0.00497034	0.00657367	0.00609267	0.00513067	0.00625301	0.00577201	0.00593234	0.00625301	0.00705467	0.0102613	0.0123457	0.00978034	0.015392	0.0128267	0.0171557	0.0150713	0.0165143	0.0243707	0.0333494	0.032708	0.0445727	0.0639731	0.0753567	0.00652176	0.00511532	0.0102306	0.00891972	0.0136164	0.023028	0.195728	0.931165	0.277316
TCGA-KK-A8ID	0.0074384	0.0055788	0.00495893	0.00728343	0.00526887	0.00867813	0.00728343	0.00635363	0.00635363	0.0097629	0.00728343	0.0069735	0.00666357	0.00635363	0.00852317	0.0051139	0.00728343	0.0105377	0.0088331	0.00960793	0.0097629	0.00821323	0.0123973	0.0128622	0.0144119	0.0154967	0.0182861	0.0192159	0.0291337	0.0275841	0.0362622	0.0663257	0.107392	0.00791272	0.0173412	0.0164285	0.020462	0.0159435	0.0215149	0.308952	0.89342	0.617264
TCGA-KK-A8IF	0.00731113	0.00812348	0.00758191	0.00676956	0.006228	0.00866504	0.00785269	0.00785269	0.006228	0.00568643	0.0121852	0.00785269	0.00866504	0.00487409	0.00920661	0.00704035	0.0102897	0.0102897	0.0143515	0.0143515	0.0157054	0.0132683	0.0192256	0.0170593	0.0200379	0.0203087	0.0213918	0.0205795	0.0303276	0.0370972	0.0465746	0.077173	0.102356	0.0203271	0.0211017	0.0351695	0.0233623	0.0351064	0.0541184	0.432912	0.666547	0.531139
TCGA-KK-A8IG	0.00736525	0.00602611	0.00401741	0.00368262	0.00334784	0.00301306	0.00535655	0.00803482	0.00535655	0.00669568	0.0103783	0.00569133	0.00569133	0.0063609	0.00569133	0.00770003	0.00937395	0.00703047	0.0063609	0.0133914	0.0160696	0.00870439	0.0164044	0.0143957	0.0227653	0.0204218	0.0224305	0.0338132	0.0482089	0.0448611	0.0562437	0.0917308	0.0863743	0.0092679	0.0142789	0.0103846	0.0155211	0.0181405	0.0280496	0.327178	0.719031	0.816593
TCGA-KK-A8IH	0.00264784	0.00370697	0.00511915	0.00282436	0.00229479	0.00247132	0.00123566	0.00247132	0.00264784	0.00335393	0.00247132	0.00406002	0.00441306	0.00211827	0.00406002	0.00300088	0.00370697	0.00670786	0.00441306	0.0054722	0.00847308	0.00635481	0.00882613	0.0086496	0.00882613	0.00653133	0.0130627	0.0167696	0.0197705	0.0197705	0.0458959	0.0889673	0.142101	0.00316279	0.00465136	0.00620181	0.00695202	0.00541684	0.0098986	0.30483	0.918275	0.416534
TCGA-KK-A8II	0.00471328	0.00424195	0.00471328	0.00392773	0.00471328	0.00565593	0.00549882	0.00424195	0.00534171	0.00659859	0.00738413	0.00628437	0.00738413	0.0069128	0.00769835	0.00502749	0.00534171	0.00942655	0.00816968	0.010055	0.0111548	0.00801257	0.0152396	0.0139827	0.0175962	0.0113119	0.0166536	0.0188531	0.0342498	0.0323645	0.0562451	0.094894	0.138099	0.00797351	0.0151138	0.0145927	0.015579	0.0187283	0.0209876	0.447537	0.759641	0.4382
TCGA-KK-A8IJ	0.00300546	0.00327869	0.0010929	0.00245902	0.00191257	0.00218579	0.00218579	0.00519126	0.00273224	0.00327869	0.00191257	0.00382514	0.00382514	0.00327869	0.00300546	0.00300546	0.00409836	0.00546448	0.00519126	0.0057377	0.00765027	0.0057377	0.00983607	0.00983607	0.0101093	0.00901639	0.0125683	0.020765	0.0256831	0.029235	0.0510929	0.107923	0.204372	0.00216824	0.00708605	0.00283442	0.00635459	0.00495134	0.00765595	0.517808	0.776712	0.170182
TCGA-KK-A8IK	0.00551065	0.00771492	0.00404115	0.00587803	0.00495959	0.00826598	0.00734754	0.00771492	0.00716385	0.00771492	0.00900073	0.0115724	0.00881705	0.00679647	0.0101029	0.00900073	0.00679647	0.0126745	0.0101029	0.0115724	0.0152461	0.0154298	0.017083	0.0191036	0.020022	0.0183688	0.0183688	0.028288	0.0405952	0.0349008	0.0499633	0.0802719	0.0990081	0.0163534	0.0183239	0.0267224	0.0243443	0.0236259	0.0442447	0.402031	0.699638	0.456784
TCGA-KK-A8IL	0.00903692	0.00697134	0.00826233	0.0103279	0.00619675	0.0100697	0.0121353	0.00748774	0.00955332	0.0105861	0.0126517	0.0113607	0.00852053	0.0131681	0.0113607	0.00877872	0.0105861	0.0129099	0.0123935	0.0172993	0.0170411	0.0160083	0.0178156	0.0180738	0.0240124	0.0160083	0.0229796	0.0237542	0.0356313	0.0302091	0.0317583	0.0568035	0.0746192	0.0164743	0.02692	0.0301504	0.0321882	0.0214974	0.0539396	0.304016	0.799487	0.480963
TCGA-KK-A8IM	0.00652906	0.0056866	0.00610783	0.00547599	0.00442291	0.0056866	0.00400168	0.0056866	0.00484414	0.00631845	0.00652906	0.00652906	0.00695029	0.00695029	0.00884583	0.00673968	0.0084246	0.00968829	0.0124263	0.0103201	0.0145324	0.0115838	0.0172704	0.0134794	0.0237995	0.017481	0.0252738	0.0309604	0.0425442	0.0358045	0.059604	0.0987784	0.126158	0.0174962	0.0145808	0.0145808	0.017947	0.0094177	0.0395942	0.501905	0.575641	0.219488
TCGA-M7-A71Y	0.00342857	0.00514286	0.00685714	0.00457143	0.00514286	0.00857143	0.0114286	0.0102857	0.00685714	0.00514286	0.00742857	0.00685714	0.00742857	0.00628571	0.00857143	0.00685714	0.00857143	0.008	0.00742857	0.0108571	0.0142857	0.0131429	0.0205714	0.0131429	0.0188571	0.0205714	0.0257143	0.0274286	0.0354286	0.0365714	0.0594286	0.114286	0.140571	0.0220046	0.0191769	0.021574	0.0238852	0.0263209	0.0541525	0.576085	0.409817	0.84164
TCGA-M7-A71Z	0.00582437	0.00537634	0.00358423	0.00403226	0.00358423	0.00537634	0.00537634	0.00582437	0.00582437	0.00582437	0.00672043	0.00896057	0.0094086	0.00537634	0.00985663	0.00716846	0.00806452	0.00851254	0.00716846	0.0134409	0.0120968	0.0107527	0.0165771	0.015233	0.0197133	0.0174731	0.0129928	0.0237455	0.0331541	0.030914	0.0591398	0.104391	0.154122	0.0067415	0.0297432	0.016524	0.0148183	0.0164943	0.0421978	0.555311	0.618267	0.94936
TCGA-M7-A720	0.00492914	0.00492914	0.00554529	0.00492914	0.00554529	0.00369686	0.00739372	0.00492914	0.00677757	0.00985829	0.00308071	0.0147874	0.008626	0.00985829	0.0123229	0.00616143	0.00985829	0.012939	0.00800986	0.0203327	0.0184843	0.021565	0.025878	0.0209489	0.0252619	0.0277264	0.0289587	0.034504	0.0449784	0.0597659	0.0523722	0.101664	0.0942699	0.0183521	0.0209918	0.0239907	0.0268927	0.0299345	0.0648003	0.448236	0.196286	0.941098
TCGA-M7-A721	0.00792541	0.00792541	0.0107226	0.00699301	0.00559441	0.00839161	0.00792541	0.00606061	0.00559441	0.00885781	0.00839161	0.0107226	0.00839161	0.0125874	0.00885781	0.00979021	0.0111888	0.0167832	0.0111888	0.018648	0.018648	0.02331	0.018648	0.0135198	0.0242424	0.0247086	0.0275058	0.030303	0.0456876	0.0386946	0.0596737	0.0913753	0.100233	0.0191844	0.0376181	0.0446715	0.0421686	0.0352037	0.0669695	0.493831	0.199829	0.450968
TCGA-M7-A722	0.0252182	0.0160039	0.013579	0.0184287	0.0184287	0.0213385	0.0179437	0.0179437	0.0116392	0.0203686	0.0198836	0.0160039	0.014064	0.0174588	0.0198836	0.0155189	0.0155189	0.0164888	0.0150339	0.0208535	0.014549	0.0160039	0.0223084	0.014549	0.0150339	0.0164888	0.0198836	0.0116392	0.0300679	0.0184287	0.0295829	0.0499515	0.057711	0.0491546	0.0963857	0.11245	0.134456	0.125077	0.129383	0.373509	0.285625	0.251988
TCGA-M7-A723	0.0314634	0.0282927	0.0256098	0.0265854	0.0209756	0.0287805	0.0221951	0.0234146	0.0231707	0.0263415	0.0231707	0.0202439	0.0197561	0.0192683	0.0214634	0.0158537	0.0095122	0.0153659	0.0136585	0.017561	0.0168293	0.0109756	0.0126829	0.0112195	0.0126829	0.0131707	0.0136585	0.0141463	0.0163415	0.0146341	0.0182927	0.0282927	0.0287805	0.114162	0.157718	0.178068	0.202777	0.123578	0.086617	0.195498	0.125914	0.269318
TCGA-M7-A724	0.00455137	0.00650195	0.0123537	0.00585176	0.00910273	0.00715215	0.00780234	0.00845254	0.00650195	0.00715215	0.00910273	0.0123537	0.00715215	0.0123537	0.00780234	0.0117035	0.0104031	0.0162549	0.0162549	0.0110533	0.00975293	0.0104031	0.0123537	0.0162549	0.0208062	0.0156047	0.0136541	0.0312094	0.0279584	0.0331599	0.0604681	0.0988296	0.13329	0.0227128	0.0306191	0.0278355	0.0221886	0.0277856	0.0273402	0.557464	0.505796	0.933432
TCGA-M7-A725	0.00828729	0.0101289	0.00736648	0.00460405	0.00736648	0.0092081	0.0128913	0.00736648	0.00644567	0.00644567	0.00736648	0.00644567	0.014733	0.0092081	0.0128913	0.00828729	0.0138122	0.0138122	0.0101289	0.019337	0.0156538	0.019337	0.0248619	0.0138122	0.0230203	0.0211786	0.0303867	0.0368324	0.0506446	0.0524862	0.0543278	0.0773481	0.112339	0.032848	0.0506083	0.0322053	0.0275056	0.0321475	0.0632644	0.548342	0.134838	0.932049
TCGA-MG-AAMC	0.00424328	0.00339463	0.00169731	0.0019802	0.00254597	0.00339463	0.00565771	0.00311174	0.0019802	0.0039604	0.00282885	0.00735502	0.00509194	0.00565771	0.00509194	0.00424328	0.00565771	0.00763791	0.00792079	0.00792079	0.00735502	0.0121641	0.0127298	0.0101839	0.0155587	0.0101839	0.0181047	0.0231966	0.029703	0.0291372	0.0531825	0.0975955	0.149081	0.00488986	0.00799031	0.0111864	0.009554	0.00558318	0.0164811	0.411374	0.825871	0.258396
TCGA-QU-A6IL	0.00166793	0.00121304	0.0015163	0.00045489	0.00060652	0.00166793	0.00090978	0.00045489	0.00106141	0.00045489	0.00136467	0.00106141	0.00090978	0.0015163	0.00075815	0.00136467	0.00090978	0.0015163	0.00136467	0.00166793	0.00136467	0.00257771	0.00379075	0.00363912	0.00576194	0.00439727	0.00970432	0.011069	0.0222896	0.0195603	0.045489	0.107354	0.224564	0.000918283	0.000300105	0.000900315	0.00119612	0.00239653	0.00294765	0.434202	0.866351	0.0108822
TCGA-QU-A6IM	0.00262431	0.0019337	0.00303867	0.00345304	0.00234807	0.0038674	0.00276243	0.00179558	0.00220994	0.00234807	0.00345304	0.00331492	0.00303867	0.00290055	0.00345304	0.00359116	0.00248619	0.00455801	0.0038674	0.00455801	0.00455801	0.00331492	0.00303867	0.00455801	0.00621547	0.00649171	0.00621547	0.00911602	0.0106354	0.0149171	0.023895	0.05	0.100552	0.00250583	0.00223345	0.00379687	0.00289308	0.00468184	0.00614238	0.158844	0.98143	0.162006
TCGA-QU-A6IN	0.00344056	0.00326854	0.00292448	0.00395665	0.00292448	0.00498882	0.00326854	0.00447273	0.00292448	0.00447273	0.00309651	0.00378462	0.00464476	0.00223637	0.00567693	0.00464476	0.00464476	0.00464476	0.00636504	0.00584896	0.00980561	0.00894547	0.00928952	0.00877344	0.0132462	0.0127301	0.0115259	0.018579	0.0227077	0.0273525	0.042835	0.0789609	0.111474	0.00360648	0.00825048	0.00510744	0.00469766	0.00549045	0.0127343	0.248713	0.933824	0.110369
TCGA-QU-A6IO	0.00173511	0.00318103	0.00260266	0.000578369	0.00260266	0.00347021	0.00347021	0.00289184	0.00231348	0.00289184	0.0037594	0.00318103	0.00231348	0.00202429	0.00491614	0.00318103	0.00144592	0.00549451	0.00520532	0.00462695	0.00954309	0.0106998	0.0092539	0.0092539	0.0130133	0.0135917	0.0185078	0.021978	0.0419318	0.0433777	0.082996	0.134471	0.195778	0.00278118	0.00454461	0.00818029	0.00543398	0.0108875	0.0178549	0.601143	0.543426	0.120033
TCGA-QU-A6IP	0.0031864	0.00504514	0.00345194	0.0023898	0.00212427	0.00557621	0.00371747	0.00345194	0.00292087	0.00557621	0.00451407	0.00531067	0.00398301	0.00584174	0.00584174	0.00424854	0.00424854	0.00743494	0.00477961	0.00876261	0.0103558	0.00663834	0.0127456	0.0111524	0.0135422	0.0127456	0.0146044	0.0257568	0.0281466	0.0294742	0.0576208	0.102762	0.185608	0.0057214	0.00721216	0.0104176	0.00958174	0.0119987	0.0149547	0.547221	0.716319	0.510102
TCGA-SU-A7E7	0	0	0.000947867	0	0	0	0	0.000947867	0	0	0	0	0	0	0.000947867	0.000947867	0	0	0	0.000947867	0.000947867	0.000947867	0.000947867	0.0028436	0.000947867	0.00189573	0.00189573	0.000947867	0.00853081	0.0056872	0.0218009	0.0616114	0.172512	0	0	0	0	0	0.00134374	0.243247	0.964969	0.00189933
TCGA-TK-A8OK	0.00248853	0.0025663	0.00202193	0.002333	0.00155533	0.00241076	0.0030329	0.002333	0.00217746	0.00194416	0.002333	0.00342173	0.0030329	0.0025663	0.00287736	0.00225523	0.0030329	0.00349949	0.00412163	0.00489929	0.00489929	0.00388833	0.00482153	0.00474376	0.00598802	0.00629909	0.00762112	0.00839879	0.0105763	0.0117427	0.0174197	0.0340617	0.0504705	0.00193939	0.0017896	0.00234885	0.00278622	0.00346112	0.00373522	0.0709158	0.994788	0.0383278
TCGA-TP-A8TT	0.00683891	0.00506586	0.00582573	0.00810537	0.00506586	0.00785208	0.00506586	0.00531915	0.00683891	0.00987842	0.0113982	0.0108916	0.00734549	0.00734549	0.00911854	0.00937183	0.00911854	0.0116515	0.0101317	0.0159574	0.0139311	0.0144377	0.0243161	0.0141844	0.0222898	0.0200101	0.025076	0.031155	0.0321682	0.029382	0.0504053	0.0739615	0.0985309	0.0132273	0.0259371	0.0270178	0.0226136	0.0280481	0.0435207	0.410698	0.69259	0.322006
TCGA-TP-A8TV	0.00607042	0.0072845	0.00526103	0.00526103	0.00647511	0.00566572	0.0072845	0.0113314	0.0072845	0.00607042	0.0101174	0.0109268	0.00930797	0.0109268	0.00930797	0.00607042	0.0129502	0.0121408	0.0105221	0.0182113	0.0149737	0.0174019	0.0210441	0.0161878	0.0246864	0.0214488	0.0222582	0.0356131	0.0542291	0.0461352	0.0611089	0.0938891	0.0951032	0.00816276	0.0220084	0.0240091	0.0279102	0.0359491	0.074676	0.459331	0.207188	0.940005
TCGA-V1-A8MF	0.00308748	0.00445969	0.00274443	0.00171527	0.00137221	0.00171527	0.00343053	0.00240137	0.00205832	0.00308748	0.00343053	0.00240137	0.00480274	0.00274443	0.00617496	0.00343053	0.0051458	0.00651801	0.00445969	0.00720412	0.00823328	0.00480274	0.0109777	0.00686106	0.0116638	0.00926244	0.0154374	0.0205832	0.0236707	0.0274443	0.0662093	0.109777	0.174614	0.00278369	0.00272923	0.00909742	0.00362592	0.00998921	0.00893553	0.452375	0.803433	0.260803
TCGA-V1-A8MK	0.00179024	0.000895122	0.000895122	0.0011935	0.00104431	0.00208862	0.00134268	0.000895122	0.0011935	0.0011935	0.00268536	0.00253618	0.0022378	0.00313293	0.00313293	0.00164106	0.00253618	0.00253618	0.00313293	0.00372967	0.00522154	0.00358049	0.00522154	0.00626585	0.00626585	0.0068626	0.00924959	0.0140236	0.0201402	0.0217813	0.0378935	0.0823512	0.149784	0.00204104	0.00171524	0.00114349	0.00284848	0.00256824	0.00477335	0.280394	0.938372	0.0183804
TCGA-V1-A8ML	0.00363967	0.00500455	0.00363967	0.00363967	0.00318471	0.00454959	0.00591447	0.00409463	0.00409463	0.00500455	0.00318471	0.00636943	0.00500455	0.00363967	0.0104641	0.00500455	0.00818926	0.00955414	0.00864422	0.00909918	0.010919	0.0118289	0.0136488	0.0118289	0.0163785	0.010919	0.0204732	0.0282075	0.0414013	0.0327571	0.0609645	0.109645	0.154231	0.00313826	0.00769215	0.010769	0.00613166	0.00921402	0.0241769	0.509496	0.679328	0.112198
TCGA-V1-A8MM	0.00160146	0.00228781	0.00137268	0.00137268	0.000686342	0.00183024	0.0011439	0.00205903	0.00205903	0.00228781	0.00183024	0.00228781	0.00274537	0.00137268	0.00228781	0.00274537	0.00274537	0.00343171	0.00434683	0.00617708	0.00754976	0.00549073	0.00983757	0.00663464	0.00846488	0.0109815	0.0164722	0.020819	0.0329444	0.03752	0.0693205	0.14253	0.192404	0.00127437	0.00249887	0.00374831	0.00622479	0.00561238	0.00859042	0.513267	0.710396	0.0626049
TCGA-V1-A8MU	0.00422103	0.00537222	0.00498849	0.00613968	0.00498849	0.00422103	0.0038373	0.00575595	0.00575595	0.00575595	0.00844206	0.00690714	0.00729087	0.00613968	0.00729087	0.00729087	0.00652341	0.00729087	0.00959325	0.0111282	0.00959325	0.00959325	0.0130468	0.0134305	0.0145817	0.0130468	0.0161167	0.0207214	0.0310821	0.0399079	0.0675365	0.103991	0.144282	0.0041602	0.0190344	0.0122364	0.0243851	0.0190002	0.0160249	0.499415	0.669429	0.158762
TCGA-V1-A8WL	0.0121403	0.0116906	0.00899281	0.0101169	0.00809353	0.00854317	0.0103417	0.0130396	0.0121403	0.0105665	0.0116906	0.00809353	0.013714	0.0107914	0.0128147	0.0134892	0.00989209	0.0191097	0.0150629	0.0132644	0.0166367	0.0177608	0.0218076	0.017536	0.024955	0.0179856	0.0213579	0.0242806	0.0283273	0.0292266	0.0406924	0.0618255	0.0809353	0.0242605	0.0294491	0.0385104	0.0496583	0.0429638	0.0467251	0.39835	0.631827	0.377446
TCGA-V1-A8WS	0.00152944	0.00229416	0.00127453	0.00203926	0.00229416	0.00178435	0.00280398	0.00229416	0.00152944	0.00178435	0.00331379	0.00305888	0.0035687	0.00280398	0.00560795	0.00254907	0.00331379	0.00535305	0.00229416	0.00790212	0.00892174	0.00586286	0.0119806	0.00994137	0.00968646	0.0142748	0.0170788	0.0234514	0.0402753	0.038491	0.0680602	0.128473	0.200612	0.00306372	0.00675849	0.00600755	0.00523776	0.0119935	0.00663822	0.577358	0.639715	0.0804546
TCGA-V1-A8WV	0.00543725	0.00498414	0.00475759	0.00634345	0.00453104	0.00475759	0.00407793	0.00589035	0.00339828	0.00475759	0.00543725	0.00543725	0.0056638	0.00475759	0.00589035	0.00747621	0.00543725	0.00860897	0.00951518	0.0104214	0.0122338	0.0120072	0.00974173	0.00815587	0.0140462	0.0122338	0.0142728	0.0183507	0.0251473	0.0258269	0.0419121	0.0962845	0.141821	0.00590231	0.0167175	0.00514385	0.0147355	0.0115529	0.0252616	0.39322	0.844229	0.264154
TCGA-V1-A8WW	0.0113404	0.0124745	0.0104332	0.0124745	0.0113404	0.0111136	0.014289	0.0149694	0.0129281	0.0161034	0.0145158	0.0147426	0.0151962	0.0136085	0.0161034	0.0127013	0.0131549	0.0190519	0.0127013	0.0183715	0.0185983	0.0129281	0.0192787	0.0163302	0.0188251	0.0185983	0.0147426	0.0238149	0.0226809	0.0283511	0.026083	0.0505784	0.0721252	0.0318235	0.03929	0.0439123	0.0449063	0.0611362	0.047671	0.358999	0.698806	0.420395
TCGA-V1-A8X3	0.00198132	0.00113218	0.000990659	0.000424568	0.0018398	0.00113218	0.00155675	0.00198132	0.00113218	0.00240589	0.00198132	0.0018398	0.00240589	0.00283046	0.00198132	0.00155675	0.00226436	0.00353807	0.00353807	0.00523634	0.00580243	0.0049533	0.00665157	0.0080668	0.00976507	0.0104727	0.0101896	0.0169827	0.0239174	0.0291537	0.0597226	0.109397	0.196575	0.00135494	0.00265685	0.00232475	0.0019855	0.00265209	0.00750253	0.450654	0.829605	0.0506413
TCGA-V1-A9O5	0.00838145	0.00745018	0.00931272	0.00633265	0.00819519	0.00875396	0.00819519	0.0085677	0.00745018	0.00745018	0.0137828	0.00819519	0.00912647	0.00838145	0.0108028	0.0085677	0.00931272	0.010244	0.0106165	0.0122928	0.0139691	0.0122928	0.0143416	0.0121065	0.0147141	0.0115478	0.011734	0.019743	0.0296145	0.0262619	0.0365059	0.0633265	0.0730117	0.0154656	0.0116638	0.0233277	0.0185952	0.019793	0.0280679	0.223337	0.909301	0.356255
TCGA-V1-A9O9	0.0108225	0.0072806	0.00669028	0.00826446	0.0072806	0.00787092	0.0100354	0.0110193	0.00826446	0.0112161	0.00806769	0.0118064	0.0121999	0.00865801	0.014758	0.0127902	0.00865801	0.0135773	0.0133806	0.0157418	0.0151515	0.0118064	0.0155451	0.0153483	0.0210547	0.0123967	0.017316	0.0204644	0.0267611	0.021645	0.0358127	0.0627706	0.085793	0.0159221	0.0230442	0.0223008	0.0207395	0.0281971	0.0459984	0.316628	0.838048	0.402791
TCGA-V1-A9OA	0.00889757	0.0093316	0.00759549	0.0108507	0.00868056	0.00998264	0.0106337	0.0104167	0.00868056	0.0101997	0.0101997	0.00954861	0.0108507	0.00954861	0.00976562	0.00846354	0.0117188	0.0134549	0.0115017	0.015191	0.015625	0.0143229	0.0214844	0.0197483	0.0260417	0.0177951	0.0227865	0.0262587	0.030816	0.0271267	0.0334201	0.0451389	0.0566406	0.0155174	0.0349022	0.0205833	0.028535	0.0285863	0.0571351	0.228187	0.834938	0.642977
TCGA-V1-A9OF	0.00297007	0.00297007	0.0027416	0.00251314	0.00319854	0.00228467	0.003427	0.00365547	0.00388394	0.00479781	0.00388394	0.00365547	0.00434087	0.00388394	0.00502627	0.00502627	0.00502627	0.00708248	0.00388394	0.00776788	0.00936715	0.00959561	0.0118803	0.00822481	0.0125657	0.00913868	0.0155358	0.0187343	0.0328992	0.0331277	0.0566598	0.093443	0.138908	0.00185137	0.00544545	0.00847069	0.00723456	0.0126832	0.0130742	0.359383	0.864174	0.235908
TCGA-V1-A9OH	0.00351906	0.00273705	0.00273705	0.00234604	0.00293255	0.00508309	0.00273705	0.00215054	0.00410557	0.00488759	0.00391007	0.00508309	0.00410557	0.00312805	0.00625611	0.00312805	0.00508309	0.0054741	0.00664712	0.00821114	0.00782014	0.00879765	0.00957967	0.00899316	0.0144673	0.0109482	0.0173998	0.0209189	0.0314761	0.0375367	0.058651	0.107918	0.167937	0.00285997	0.00841202	0.00785122	0.00670549	0.00615775	0.0137705	0.470614	0.773583	0.101137
TCGA-V1-A9OL	0.00733753	0.00628931	0.00489168	0.00733753	0.00908456	0.00873515	0.00733753	0.0059399	0.00803634	0.0101328	0.0104822	0.00943396	0.0125786	0.00943396	0.00698812	0.00803634	0.00873515	0.012928	0.012928	0.0143256	0.011181	0.0125786	0.0167715	0.0122292	0.0174703	0.0178197	0.0178197	0.0167715	0.0265549	0.0213138	0.03529	0.0607966	0.107966	0.00979797	0.0252164	0.0228149	0.0119648	0.0239726	0.0448177	0.362481	0.849309	0.395249
TCGA-V1-A9OQ	0.00569687	0.00569687	0.0045045	0.00609433	0.00463699	0.00582936	0.00503445	0.00609433	0.00397456	0.00662427	0.00688924	0.00768415	0.00887652	0.00702173	0.0082141	0.00900901	0.00808161	0.00993641	0.00847907	0.0108638	0.0155008	0.0111288	0.0170906	0.013646	0.0218601	0.0148384	0.0198728	0.0245098	0.040673	0.0340488	0.0604134	0.0912825	0.117912	0.00874699	0.0161428	0.0110981	0.0216141	0.0261849	0.0267562	0.438612	0.699808	0.454897
TCGA-V1-A9OT	0.000714286	0.000238095	0.00119048	0.00047619	0.00047619	0.00119048	0.000714286	0.00119048	0.00142857	0.00142857	0.000714286	0.00285714	0.00166667	0.00190476	0.00238095	0.00238095	0.00333333	0.00357143	0.00333333	0.005	0.0052381	0.00642857	0.0102381	0.00595238	0.00880952	0.0109524	0.0130952	0.017381	0.03	0.0357143	0.0630952	0.128333	0.229762	0.000626653	0.000614392	0.00184317	0.00122438	0.00306645	0.0132761	0.579209	0.696852	0.00647003
TCGA-V1-A9OX	0.000633112	0.000949668	0.000633112	0.00158278	0.00158278	0.00189934	0.000949668	0.000949668	0.00126622	0.00189934	0.00221589	0.00253245	0.00221589	0.00379867	0.00189934	0.00221589	0.00189934	0.00189934	0.00379867	0.00538145	0.00474834	0.00601456	0.00569801	0.00506489	0.00823045	0.00696423	0.0148781	0.0208927	0.0265907	0.0275404	0.0591959	0.129788	0.222855	0	0.00384698	0.00230819	0.00153328	0.00153603	0.00604564	0.529158	0.759162	0.0445984
TCGA-V1-A9OY	0.0119149	0.0153191	0.0130496	0.0178723	0.0124823	0.017305	0.0161702	0.018156	0.0141844	0.0130496	0.0153191	0.018156	0.0195745	0.0170213	0.0133333	0.013617	0.0153191	0.0141844	0.0184397	0.0204255	0.0232624	0.0141844	0.0201418	0.0207092	0.0195745	0.0175887	0.0175887	0.0221277	0.0252482	0.0238298	0.0306383	0.0397163	0.0547518	0.0524741	0.0720263	0.0720263	0.0632243	0.0599142	0.0757978	0.323342	0.569618	0.473298
TCGA-V1-A9Z7	0.00208333	0.00277778	0.000694444	0.00208333	0.000925926	0.00162037	0.0025463	0.00231481	0.00138889	0.00208333	0.00208333	0.00208333	0.00162037	0.00185185	0.0037037	0.00347222	0.00300926	0.0025463	0.00347222	0.00555556	0.00486111	0.00694444	0.00740741	0.00555556	0.00902778	0.0113426	0.0125	0.0171296	0.0236111	0.0284722	0.0488426	0.0967593	0.175463	0.000524902	0.00154389	0.00360242	0.00307672	0.00359596	0.00556021	0.381091	0.881838	0.100407
TCGA-V1-A9Z8	0.00320586	0.00572475	0.00354935	0.00446531	0.0046943	0.00389283	0.00446531	0.00538127	0.00286238	0.00423632	0.00561026	0.00629723	0.00652622	0.00606824	0.00721319	0.00549576	0.00755668	0.00744218	0.00732768	0.0100756	0.0121365	0.00893062	0.0136249	0.0123655	0.0167163	0.0144264	0.0179757	0.0277078	0.0333181	0.0319441	0.0504923	0.092512	0.112778	0.00732751	0.012213	0.0129315	0.013243	0.0121911	0.0250499	0.345656	0.830978	0.479298
TCGA-V1-A9Z9	0.00991189	0.00688326	0.00605727	0.00812225	0.00660793	0.00619493	0.00564427	0.00757159	0.00619493	0.00715859	0.00825991	0.00963656	0.00825991	0.00784692	0.00881057	0.00963656	0.00688326	0.0103249	0.00825991	0.0132159	0.0125275	0.0100496	0.0141795	0.0129405	0.0163822	0.0115639	0.0150055	0.0200991	0.0286344	0.027533	0.0421256	0.0680066	0.0987059	0.010312	0.0171434	0.02066	0.015768	0.0197454	0.0233146	0.307904	0.874755	0.282999
TCGA-V1-A9ZG	0.00299118	0.00330605	0.00377834	0.0020466	0.00267632	0.00330605	0.00251889	0.00393577	0.00377834	0.00330605	0.00362091	0.00425063	0.00362091	0.00283375	0.00472292	0.00330605	0.00362091	0.00535264	0.00535264	0.00598237	0.00645466	0.00771411	0.0110202	0.00708438	0.010233	0.0118073	0.0118073	0.0181045	0.0280227	0.0250315	0.0516373	0.0985516	0.151763	0.00361037	0.00511294	0.00747276	0.0054865	0.0102075	0.008885	0.370397	0.868742	0.141022
TCGA-V1-A9ZI	0.00395257	0.0055336	0.0027668	0.00197628	0.00355731	0.00237154	0.00395257	0.00237154	0.0027668	0.00513834	0.00474308	0.00711462	0.00355731	0.00434783	0.00592885	0.00474308	0.0055336	0.00869565	0.00750988	0.00790514	0.0114625	0.00869565	0.0142292	0.0114625	0.0118577	0.015415	0.0173913	0.029249	0.0387352	0.0403162	0.070751	0.127668	0.162055	0.00135932	0.00266545	0.00799636	0.00398385	0.011973	0.0170171	0.533812	0.601515	0.314729
TCGA-V1-A9ZK	0.000355619	0.00160028	0.00142248	0.00124467	0.000889047	0.000889047	0.000711238	0.00124467	0.00106686	0.00124467	0.000889047	0.00106686	0.0019559	0.00177809	0.00177809	0.00142248	0.00337838	0.00160028	0.00302276	0.003734	0.00711238	0.00462304	0.00711238	0.00640114	0.00746799	0.00853485	0.0104908	0.0202703	0.026138	0.0304054	0.0661451	0.135669	0.217283	0.00131456	0.000429613	0.00128884	0.00256844	0.00171537	0.00379771	0.512875	0.76008	0.0298347
TCGA-V1-A9ZR	0.00348584	0.00348584	0.00217865	0.00087146	0.00261438	0.00392157	0.00653595	0.00392157	0.00261438	0.00305011	0.0043573	0.00392157	0.00697168	0.00348584	0.00697168	0.00392157	0.00610022	0.00697168	0.00740741	0.0108932	0.011329	0.00479303	0.0139434	0.0126362	0.0135076	0.0152505	0.0165577	0.0239651	0.0331155	0.037037	0.0684096	0.111111	0.142484	0.010194	0.0128502	0.00856677	0.00853605	0.00997663	0.0196334	0.456117	0.714165	0.522492
TCGA-VP-A872	0.00414938	0.00465233	0.0038979	0.00402364	0.00326921	0.00465233	0.00314347	0.00729285	0.00578398	0.00565824	0.0055325	0.00490381	0.00792154	0.00653841	0.00465233	0.00465233	0.00628694	0.00528103	0.00540676	0.0106878	0.0105621	0.00704137	0.00980762	0.0094304	0.0128253	0.0106878	0.0125739	0.0206211	0.0282912	0.025022	0.0490381	0.0897774	0.15403	0.00713982	0.0101502	0.00735012	0.0108113	0.0115295	0.0134073	0.418865	0.837731	0.312559
TCGA-VP-A875	0.00436443	0.00763775	0.00472813	0.00472813	0.00636479	0.00581924	0.00563739	0.00509183	0.00490998	0.00636479	0.00691035	0.00509183	0.00654664	0.00527369	0.0107292	0.0070922	0.00618294	0.0078196	0.0070922	0.012184	0.012184	0.0101837	0.0112748	0.00872886	0.0114566	0.0109111	0.0120022	0.0181851	0.0227314	0.0223677	0.040371	0.0681942	0.115112	0.0100519	0.00985519	0.0107938	0.0112227	0.0089006	0.0193596	0.29021	0.917852	0.293303
TCGA-VP-A876	0.00362488	0.00374181	0.00315716	0.00409261	0.0025725	0.00467727	0.00444341	0.00491113	0.00432647	0.00362488	0.00444341	0.00374181	0.00526193	0.00467727	0.00713283	0.00385875	0.00619738	0.00689897	0.00760056	0.0109916	0.0140318	0.00923761	0.0128625	0.0107577	0.0132133	0.0155519	0.0206969	0.0252572	0.0380028	0.0377689	0.0636109	0.118569	0.162184	0.00693294	0.0123951	0.00879649	0.0139443	0.0123728	0.0153163	0.541784	0.624204	0.497685
TCGA-VP-A878	0.00337496	0.00151873	0.00236247	0.00219372	0.00303746	0.00168748	0.00219372	0.00320621	0.00371245	0.00236247	0.00354371	0.00269997	0.0038812	0.00269997	0.00354371	0.00219372	0.00320621	0.00320621	0.00354371	0.00455619	0.00607492	0.00607492	0.0080999	0.00793115	0.00793115	0.00759366	0.00877489	0.0153561	0.0242997	0.0226122	0.0442119	0.0926426	0.161492	0.00226228	0.00221802	0.00332703	0.00478848	0.00516609	0.00689873	0.345612	0.901769	0.190028
TCGA-VP-A879	0.00328623	0.00361485	0.00394348	0.000328623	0.00328623	0.00394348	0.00197174	0.00361485	0.00295761	0.00525797	0.00591522	0.00394348	0.00460072	0.00262898	0.00624384	0.00492935	0.00591522	0.00722971	0.00591522	0.00985869	0.0144594	0.00953007	0.0111732	0.014788	0.0138022	0.0131449	0.0187315	0.0276043	0.0397634	0.0391061	0.057509	0.110417	0.15281	0.00325395	0.00638056	0.00638056	0.00635769	0.0053076	0.012534	0.483085	0.711642	0.12521
TCGA-VP-A87B	0.00234467	0.00195389	0.00234467	0.003517	0.00234467	0.00312622	0.00390778	0.00390778	0.00312622	0.003517	0.00508011	0.00508011	0.00390778	0.00429855	0.007034	0.00429855	0.00937866	0.00742478	0.00664322	0.00859711	0.0113326	0.0121141	0.0132864	0.00976944	0.0195389	0.0125049	0.0179758	0.028136	0.0425948	0.0441579	0.0621336	0.112153	0.145369	0.00680358	0.00800455	0.00533637	0.0106345	0.0119853	0.0104828	0.484833	0.663386	0.497689
TCGA-VP-A87C	0.00337133	0.00321079	0.00305025	0.00224755	0.00176593	0.00240809	0.00337133	0.00385295	0.00208701	0.00288971	0.00224755	0.00288971	0.00337133	0.00385295	0.00481618	0.00385295	0.00337133	0.00642158	0.00465564	0.00593996	0.0052978	0.00706373	0.00947183	0.00995344	0.0134853	0.0109167	0.0158934	0.0219939	0.0325895	0.0362819	0.0627709	0.119441	0.186868	0.00415095	0.00316535	0.00361754	0.00495629	0.00677072	0.0115478	0.514209	0.733322	0.276557
TCGA-VP-A87D	0.00367002	0.00335089	0.00191479	0.00414872	0.00255306	0.00335089	0.00367002	0.00351045	0.00239349	0.00335089	0.00462741	0.00382958	0.00558481	0.00398915	0.00351045	0.00430828	0.00414872	0.00574438	0.00526568	0.00973352	0.00829743	0.00909526	0.0100527	0.00861656	0.0108505	0.013244	0.0175523	0.0186692	0.0347854	0.029041	0.0518589	0.0978139	0.171853	0.00583353	0.00483949	0.00615935	0.00701402	0.0109791	0.010371	0.462898	0.804162	0.699279
TCGA-VP-A87E	0.00468019	0.00561622	0.00468019	0.00624025	0.00546022	0.00468019	0.00655226	0.00436817	0.00561622	0.00780031	0.00655226	0.00639626	0.00826833	0.00655226	0.00764431	0.00795632	0.00826833	0.0102964	0.00842434	0.0107644	0.0113885	0.00889236	0.0154446	0.0120125	0.0179407	0.0190328	0.0230889	0.0288612	0.0407176	0.0336973	0.0588144	0.0887676	0.114665	0.0101788	0.0176111	0.0181981	0.0134534	0.0222673	0.0242168	0.421517	0.713424	0.452826
TCGA-VP-A87H	0.00444984	0.00444984	0.00384304	0.00404531	0.00485437	0.00404531	0.00384304	0.00384304	0.00323625	0.00627023	0.00323625	0.00627023	0.00485437	0.0052589	0.00687702	0.00485437	0.00444984	0.00788835	0.00485437	0.00849515	0.00970874	0.00788835	0.0105178	0.0109223	0.0125405	0.0147654	0.009911	0.0214401	0.0315534	0.0285194	0.0562298	0.0914239	0.13835	0.00465483	0.0114094	0.00855704	0.00909479	0.0125278	0.0162492	0.381199	0.845437	0.73319
TCGA-VP-A87J	0.00347095	0.00255754	0.00219218	0.00383632	0.00310559	0.00328827	0.00474973	0.00474973	0.00456704	0.00511509	0.00529777	0.00328827	0.00420168	0.00292291	0.00328827	0.00438436	0.00365364	0.00639386	0.00511509	0.00858604	0.00748995	0.00748995	0.00858604	0.00895141	0.00949945	0.0107782	0.00858604	0.0182682	0.0261235	0.0233833	0.0480453	0.100292	0.172269	0.00906016	0.00935041	0.00935041	0.0111803	0.00606686	0.00596961	0.4307	0.839021	0.27487
TCGA-VP-A87K	0.00569133	0.00301306	0.00334784	0.0063609	0.00234349	0.00870439	0.00602611	0.00435219	0.00368262	0.00535655	0.00669568	0.0063609	0.00770003	0.00669568	0.0063609	0.00736525	0.00770003	0.0063609	0.0103783	0.0113827	0.0107131	0.0120522	0.0164044	0.0113827	0.0210914	0.0100435	0.0177436	0.0207566	0.0398393	0.0321393	0.0502176	0.103448	0.148644	0.00360389	0.0176669	0.00942234	0.0222978	0.0223379	0.0300777	0.510875	0.684619	0.791698
TCGA-VP-AA1N	0.00481314	0.00792752	0.00707814	0.00736127	0.00736127	0.00906002	0.00651189	0.00764439	0.00537939	0.0104757	0.00821065	0.0116082	0.0101925	0.00934315	0.00764439	0.0121744	0.0104757	0.0104757	0.00962627	0.0206682	0.0169875	0.01359	0.0192525	0.0138732	0.0184032	0.0169875	0.01812	0.0251982	0.0379388	0.0334088	0.0467157	0.0846546	0.119762	0.0184545	0.0205058	0.0289494	0.036057	0.0168568	0.0379123	0.498461	0.629263	0.683102
TCGA-WW-A8ZI	0.00277123	0.00294444	0.00294444	0.00332548	0.00263267	0.00346404	0.00356796	0.00381045	0.00259803	0.00297908	0.00394901	0.00433005	0.00401829	0.00408757	0.00547319	0.00419149	0.00478038	0.00533463	0.00575031	0.00647776	0.00886795	0.00751697	0.0105307	0.00911043	0.0119509	0.0115699	0.0156228	0.0223777	0.0317306	0.0337398	0.0661979	0.127858	0.19312	0.00401218	0.00703921	0.00724625	0.00763286	0.00929989	0.0143363	0.563797	0.660578	0.785174
TCGA-X4-A8KQ	0.003704	0.00354208	0.00348136	0.00325871	0.00348136	0.00358256	0.00378497	0.00406833	0.00313727	0.00421001	0.00416953	0.00451362	0.00560661	0.00437194	0.00497915	0.00465531	0.00526252	0.00682103	0.00682103	0.00833907	0.00999879	0.00898676	0.0120836	0.0108894	0.0145731	0.0130146	0.0169008	0.0224062	0.034004	0.0335992	0.0591021	0.108792	0.157815	0.00583596	0.0103863	0.00995092	0.010473	0.0104918	0.0182038	0.473733	0.749333	0.277487
TCGA-X4-A8KS	0.0014834	0.00191606	0.00179245	0.00135979	0.00154521	0.00191606	0.00179245	0.0021633	0.000927128	0.00203968	0.002905	0.00210149	0.00278138	0.00253415	0.00271957	0.00296681	0.00228692	0.00352309	0.00383213	0.00457383	0.00581	0.0050683	0.00778787	0.00784968	0.00939489	0.00673713	0.0122381	0.0186662	0.0238581	0.0270721	0.0521664	0.104024	0.182521	0.00187579	0.0035367	0.0035367	0.00352403	0.00550736	0.0101434	0.408117	0.861842	0.0772195
TCGA-XA-A8JR	0.0100251	0.0100251	0.00710109	0.00668338	0.00543024	0.00835422	0.0112782	0.0075188	0.0112782	0.0112782	0.0112782	0.0137845	0.0104428	0.0116959	0.0137845	0.00835422	0.00877193	0.0150376	0.0075188	0.0108605	0.0146199	0.0142022	0.0150376	0.012949	0.0171261	0.0104428	0.015873	0.0221387	0.0367586	0.0229741	0.037594	0.0680869	0.100668	0.0165786	0.030883	0.0227559	0.0307723	0.0373176	0.0399124	0.382689	0.790785	0.184289
TCGA-XJ-A83F	0.00913242	0.0118721	0.00761035	0.0103501	0.00882801	0.00913242	0.0112633	0.0109589	0.0112633	0.00852359	0.0106545	0.0109589	0.0112633	0.00974125	0.0121766	0.0115677	0.00913242	0.0121766	0.0127854	0.0136986	0.0158295	0.0149163	0.0133942	0.0112633	0.0240487	0.0152207	0.0191781	0.017656	0.0298326	0.0298326	0.0432268	0.0757991	0.10411	0.0295076	0.0468395	0.0289303	0.0452989	0.0495058	0.0446529	0.46028	0.654083	0.245145
TCGA-XJ-A83G	0.0092711	0.00959079	0.0111893	0.0108696	0.00895141	0.0159847	0.0105499	0.0102302	0.0147059	0.00991049	0.00799233	0.012468	0.0121483	0.00959079	0.0121483	0.0102302	0.00959079	0.0102302	0.0102302	0.0147059	0.0147059	0.0134271	0.015665	0.0143862	0.0179028	0.012468	0.0169437	0.0236573	0.0306905	0.0361253	0.0578645	0.0824808	0.0891944	0.0374528	0.0494922	0.0526853	0.0779492	0.0366541	0.0486115	0.435153	0.528735	0.57955
TCGA-XJ-A83H	0.00517241	0.00517241	0.00344828	0.00551724	0.00275862	0.00206897	0.00586207	0.00482759	0.00517241	0.00586207	0.00862069	0.00965517	0.00655172	0.00724138	0.00931034	0.00551724	0.01	0.0113793	0.0113793	0.0175862	0.0148276	0.0175862	0.017931	0.0224138	0.03	0.0234483	0.0296552	0.0351724	0.0531034	0.0558621	0.0662069	0.1	0.0937931	0.00814009	0.0111731	0.0127693	0.014314	0.031866	0.0376262	0.42414	0.254172	0.573946
TCGA-XJ-A9DI	0.00338346	0.00150376	0.00300752	0.00526316	0.00338346	0.0037594	0.00300752	0.0037594	0.00451128	0.00300752	0.00338346	0.00451128	0.00488722	0.00601504	0.00676692	0.00451128	0.00451128	0.00827068	0.0075188	0.0075188	0.0101504	0.0101504	0.012782	0.0154135	0.0191729	0.0184211	0.0233083	0.0315789	0.0511278	0.0548872	0.0725564	0.120301	0.117669	0.00983136	0.01377	0.008262	0.0109765	0.0123708	0.0229924	0.421057	0.60939	0.110432
TCGA-XJ-A9DK	0.00711427	0.00711427	0.00800356	0.00578035	0.00489106	0.00489106	0.00933748	0.00755892	0.00489106	0.00711427	0.0102268	0.0111161	0.0102268	0.0106714	0.0115607	0.00666963	0.0102268	0.0111161	0.0111161	0.00978213	0.0120053	0.0146732	0.0177857	0.0168964	0.0151178	0.0191196	0.0266785	0.0306803	0.0426856	0.0431303	0.0666963	0.100934	0.10538	0.0171672	0.0252469	0.0294547	0.0440237	0.0441028	0.0599276	0.487122	0.330914	0.349493
TCGA-XJ-A9DQ	0.00115942	0.0021256	0.00135266	0.00154589	0.00173913	0.00173913	0.00154589	0.0021256	0.00115942	0.00270531	0.00173913	0.00289855	0.00328502	0.00173913	0.00444444	0.00289855	0.00309179	0.0036715	0.0036715	0.00463768	0.00676329	0.00637681	0.0100483	0.00811594	0.0121739	0.00850242	0.0129469	0.0202899	0.0351691	0.035942	0.066087	0.129855	0.206957	0.00215492	0.00475369	0.00369732	0.00473665	0.00527241	0.0119321	0.552639	0.697635	0.0959535
TCGA-XJ-A9DX	0.00326296	0.00537428	0.00345489	0.00537428	0.00326296	0.00441459	0.00230326	0.0024952	0.00479846	0.00364683	0.00556622	0.0059501	0.00537428	0.00345489	0.00575816	0.00518234	0.00710173	0.00690979	0.00825336	0.0084453	0.0136276	0.0105566	0.0153551	0.00998081	0.0174664	0.0138196	0.0236084	0.0326296	0.0452975	0.0495202	0.0785029	0.124376	0.121497	0.00743026	0.00874186	0.0116558	0.0145175	0.0123621	0.0271899	0.450494	0.536608	0.622753
TCGA-XK-AAIR	0.0175824	0.021978	0.0164835	0.0131868	0.0142857	0.0186813	0.0230769	0.021978	0.0208791	0.0208791	0.0252747	0.0208791	0.0263736	0.0164835	0.0208791	0.0208791	0.021978	0.0230769	0.0175824	0.0252747	0.0131868	0.0142857	0.0164835	0.0208791	0.0164835	0.0230769	0.0142857	0.00549451	0.0164835	0.0153846	0.0186813	0.0395604	0.0340659	0.077967	0.122306	0.137595	0.144718	0.152609	0.0900974	0.231501	0.209098	0.767714
TCGA-XK-AAIV	0.0112894	0.0148544	0.0154486	0.0124777	0.016637	0.0219846	0.0184195	0.0190137	0.0154486	0.0237671	0.0154486	0.0196078	0.0207962	0.0154486	0.0273321	0.00713012	0.020202	0.0196078	0.020202	0.0249554	0.026738	0.0142602	0.0261438	0.016637	0.020202	0.0190137	0.0160428	0.0130719	0.0219846	0.0160428	0.0219846	0.030303	0.0528818	0.0488555	0.0918075	0.0997907	0.0676144	0.147425	0.109777	0.347059	0.323662	0.103767
TCGA-XK-AAIW	0.0169271	0.0227865	0.0143229	0.015625	0.0169271	0.0182292	0.015625	0.0208333	0.0195312	0.015625	0.0182292	0.0130208	0.0208333	0.0143229	0.0182292	0.016276	0.016276	0.0195312	0.016276	0.0169271	0.0208333	0.0214844	0.0214844	0.00846354	0.0201823	0.016276	0.0253906	0.0208333	0.0279948	0.0208333	0.030599	0.0397135	0.0364583	0.0825723	0.121435	0.0899519	0.103074	0.121217	0.101604	0.246054	0.153784	0.641987
TCGA-XK-AAJA	0.0172209	0.0172209	0.0225653	0.0184086	0.0225653	0.0225653	0.0219715	0.0195962	0.0118765	0.0231591	0.0225653	0.0225653	0.0207838	0.0195962	0.0213777	0.013658	0.0184086	0.0207838	0.0178147	0.0243468	0.02019	0.013658	0.0225653	0.0142518	0.0207838	0.0142518	0.0219715	0.0130641	0.02019	0.0148456	0.0178147	0.0267221	0.0296912	0.0639934	0.146396	0.108752	0.116697	0.112732	0.0862747	0.204313	0.253348	0.434483
TCGA-XK-AAJP	0.009	0.0115	0.006	0.011	0.0085	0.0075	0.0125	0.0095	0.007	0.01	0.0105	0.0075	0.0075	0.006	0.0065	0.0025	0.0055	0.004	0.003	0.002	0.0035	0.0035	0.004	0.0015	0.0065	0.0025	0.0035	0.002	0.005	0.005	0.0115	0.017	0.0485	0.00566297	0.0103112	0.00872483	0.00948387	0.0142514	0.00934862	0.0751621	0.994155	0.087214
TCGA-XK-AAJR	0.0218579	0.0218579	0.0249805	0.0132709	0.0163934	0.0163934	0.0296643	0.0156128	0.0171741	0.0163934	0.0179547	0.0226386	0.0187354	0.0148322	0.0163934	0.0101483	0.0148322	0.0171741	0.0101483	0.0124902	0.0117096	0.0101483	0.00936768	0.0101483	0.0140515	0.00936768	0.0156128	0.0156128	0.019516	0.0187354	0.0257611	0.0546448	0.0663544	0.0592283	0.111672	0.0804038	0.0845664	0.0891773	0.0965226	0.370925	0.580388	0.318303
TCGA-XK-AAJT	0.000956938	0.00191388	0.00669856	0.000956938	0.00669856	0.00574163	0.00382775	0.00287081	0.00382775	0.00287081	0.00574163	0.00287081	0.00382775	0.00287081	0.00478469	0.00478469	0.00574163	0.00669856	0.00478469	0.0076555	0.00956938	0.00478469	0.0143541	0.00478469	0.00861244	0.0114833	0.0076555	0.0162679	0.0210526	0.0248804	0.0449761	0.0698565	0.0899522	0.00614122	0.00401404	0.00401404	0.00599947	0.00601026	0.0177417	0.184307	0.95879	0.384082
TCGA-XK-AAJU	0.00101667	0.00162668	0.00345669	0.00203335	0.00203335	0.00183001	0.00406669	0.00183001	0.00264335	0.00203335	0.00244002	0.00345669	0.00386336	0.00325336	0.00549004	0.00366002	0.00630338	0.00772672	0.00630338	0.00732005	0.00793005	0.00915006	0.0093534	0.0099634	0.0132168	0.0111834	0.0160634	0.0256202	0.0351769	0.0309069	0.0544937	0.0961773	0.143148	0.00276325	0.00487654	0.00650205	0.00539895	0.0108173	0.00851513	0.372653	0.852761	0.100695
TCGA-XQ-A8TA	0.00476365	0.0053133	0.00448882	0.00503848	0.00494687	0.00522169	0.00522169	0.00604617	0.00577134	0.006321	0.00522169	0.00613778	0.00778674	0.00513008	0.00558813	0.00503848	0.00613778	0.00723708	0.00641261	0.00677904	0.0085196	0.00586295	0.0109014	0.00833639	0.0116343	0.00934408	0.010993	0.014749	0.023177	0.0217112	0.0414987	0.0869366	0.159949	0.00684611	0.0139038	0.0105477	0.0121819	0.0141181	0.0160109	0.408895	0.861348	0.0965224
TCGA-XQ-A8TB	0.0025436	0.0025436	0.00290698	0.00181686	0.0025436	0.0025436	0.00308866	0.00363372	0.00218023	0.0025436	0.00454215	0.00345203	0.00399709	0.00236192	0.00399709	0.00363372	0.0052689	0.00563227	0.00472384	0.00744913	0.00835756	0.00763081	0.0109012	0.00981105	0.0138081	0.0119913	0.0170785	0.0203488	0.0308866	0.037064	0.0632267	0.118278	0.18968	0.00162631	0.00478347	0.00318898	0.00741428	0.00954977	0.0177493	0.542081	0.700966	0.275493
TCGA-Y6-A8TL	0.00596026	0.00490066	0.00476821	0.00569536	0.00490066	0.00543046	0.00556291	0.00688742	0.00569536	0.00529801	0.00529801	0.00675497	0.00794702	0.00529801	0.00649007	0.00741722	0.00635762	0.00874172	0.00834437	0.00953642	0.00993377	0.00874172	0.0115232	0.013245	0.0127152	0.0107285	0.0150993	0.0168212	0.0260927	0.0223841	0.0360265	0.0695364	0.127815	0.00508448	0.0103261	0.00890179	0.00780549	0.0184825	0.0181862	0.335681	0.89747	0.33698
TCGA-Y6-A9XI	0.00287286	0.0026294	0.00248332	0.00258071	0.00321371	0.00360325	0.00223986	0.00272679	0.0026294	0.00292156	0.00384672	0.00423626	0.00399279	0.00365195	0.00345717	0.00374933	0.0032624	0.0045771	0.00438233	0.00642742	0.00720651	0.0059405	0.00959244	0.00754735	0.0103715	0.0100794	0.0114915	0.017578	0.026294	0.0241028	0.044359	0.0894483	0.15085	0.00344097	0.0047231	0.00640992	0.00549052	0.00718419	0.010714	0.340347	0.899755	0.499995
TCGA-YL-A8HJ	0.00461302	0.00333162	0.00333162	0.00384418	0.00256279	0.0048693	0.00589441	0.0048693	0.00230651	0.00538186	0.0048693	0.00615069	0.00563813	0.00563813	0.00666325	0.00563813	0.00512558	0.00794464	0.00666325	0.0102512	0.01102	0.00896976	0.0135828	0.0120451	0.0158893	0.0148642	0.0217837	0.0287032	0.0386981	0.04408	0.0712455	0.129165	0.146848	0.00465364	0.0100377	0.00730014	0.0127294	0.0127523	0.0233032	0.510809	0.577669	0.421841
TCGA-YL-A8HK	0.00560835	0.00810095	0.00638729	0.00778938	0.00560835	0.00965883	0.00716623	0.0087241	0.00841253	0.00965883	0.00716623	0.00856831	0.0107493	0.00778938	0.00950304	0.00856831	0.00732201	0.0118399	0.0132419	0.0116841	0.015423	0.014644	0.0147998	0.015423	0.0199408	0.0179156	0.0216545	0.0208755	0.0333385	0.0294438	0.0415953	0.0655865	0.0736875	0.0144639	0.0283619	0.0313162	0.033559	0.0224129	0.0423661	0.273035	0.833535	0.310623
TCGA-YL-A8HL	0.00486809	0.00549623	0.00423995	0.00565327	0.0053392	0.00628141	0.00549623	0.00518216	0.00392588	0.00502513	0.00722362	0.00753769	0.0058103	0.0053392	0.00785176	0.00486809	0.00628141	0.00989322	0.00879397	0.0114636	0.0125628	0.013191	0.0117776	0.0119347	0.0166457	0.013505	0.0166457	0.0279523	0.0329774	0.031093	0.0530779	0.0957915	0.122016	0.0121191	0.0129152	0.017048	0.00978035	0.0159861	0.0218188	0.392143	0.794885	0.498262
TCGA-YL-A8HM	0.00634328	0.00970149	0.00746269	0.00746269	0.00485075	0.00746269	0.00783582	0.00783582	0.00895522	0.00932836	0.00858209	0.011194	0.00746269	0.00447761	0.00970149	0.00895522	0.00932836	0.0145522	0.0134328	0.0134328	0.016791	0.013806	0.0179104	0.0123134	0.0205224	0.0152985	0.025	0.0201493	0.0347015	0.0358209	0.0488806	0.0951493	0.122761	0.0237228	0.0215973	0.0398719	0.0314521	0.0265336	0.048953	0.533967	0.517737	0.183211
TCGA-YL-A8S8	0.00330792	0.00445851	0.00359557	0.00373939	0.00460233	0.00575291	0.00402704	0.0050338	0.00517762	0.0063282	0.00488998	0.00417086	0.00805408	0.00517762	0.0050338	0.00532144	0.00575291	0.00618438	0.00834172	0.00949231	0.00805408	0.0103552	0.00977995	0.0112182	0.0161082	0.0115058	0.0149576	0.0218611	0.0312095	0.0296275	0.0496189	0.0867252	0.127283	0.00450803	0.0116523	0.0124559	0.010009	0.0124335	0.0134182	0.347391	0.868281	0.506977
TCGA-YL-A8S9	0.00265487	0.00442478	0.00383481	0.00589971	0.00324484	0.00589971	0.00442478	0.00560472	0.00324484	0.00530973	0.00619469	0.00471976	0.00648968	0.00560472	0.00619469	0.00501475	0.00619469	0.00914454	0.00619469	0.0132743	0.0120944	0.00825959	0.0147493	0.00973451	0.0138643	0.0138643	0.020649	0.0253687	0.0348083	0.0303835	0.0471976	0.0920354	0.115634	0.00465861	0.0100484	0.0109619	0.00455109	0.00911853	0.018842	0.349827	0.826378	0.658505
TCGA-YL-A8SA	0.00959188	0.00846342	0.00846342	0.00808727	0.00639458	0.0110965	0.00883957	0.0086515	0.00771112	0.00977995	0.00959188	0.0094038	0.00921572	0.0101561	0.0116607	0.00846342	0.0094038	0.0159865	0.0116607	0.0171149	0.0184314	0.0141057	0.0174911	0.0139176	0.0229453	0.0220049	0.0212526	0.0342298	0.0402483	0.037051	0.0528494	0.0746662	0.0677074	0.0158457	0.0210189	0.04021	0.0391553	0.0383134	0.0574465	0.321401	0.616019	0.72612
TCGA-YL-A8SB	0.00236751	0.00473502	0.00364232	0.00528137	0.00327809	0.00509925	0.0045529	0.0045529	0.00364232	0.00528137	0.0056456	0.00509925	0.00655618	0.00528137	0.00637407	0.00528137	0.00491714	0.00855946	0.0067383	0.00983427	0.0111091	0.00983427	0.0136587	0.0120197	0.0180295	0.0158441	0.0158441	0.0267711	0.0366054	0.0402477	0.0710253	0.114915	0.145147	0.00722644	0.0161024	0.0141701	0.0154029	0.0199311	0.0328969	0.5015	0.638044	0.544661
TCGA-YL-A8SC	0.00546946	0.00820419	0.0077484	0.00820419	0.00615314	0.0102552	0.00888788	0.00888788	0.0077484	0.00934366	0.00888788	0.0109389	0.0102552	0.00865998	0.00843209	0.00706472	0.0104831	0.0148131	0.0113947	0.0191431	0.0195989	0.0143573	0.0195989	0.0170921	0.0248405	0.0209663	0.0289426	0.0316773	0.0437557	0.0353236	0.0530994	0.0722425	0.0717867	0.0188032	0.0322617	0.0218919	0.0390345	0.0448553	0.067902	0.354571	0.541424	0.836202
TCGA-YL-A8SH	0.00425653	0.00343675	0.00312145	0.00321604	0.00346828	0.00365746	0.00378358	0.00381511	0.00305839	0.00375205	0.00419347	0.00435112	0.00400429	0.00375205	0.00472947	0.00472947	0.00479253	0.00554925	0.00472947	0.00621138	0.00709421	0.00608526	0.00819776	0.00646361	0.00971119	0.00964813	0.0101841	0.0133686	0.0163955	0.0183504	0.0271787	0.0464434	0.0712259	0.00310848	0.00395067	0.00530519	0.00522994	0.00563369	0.00909116	0.124552	0.983187	0.243382
TCGA-YL-A8SI	0.00268581	0.00230213	0.00197325	0.00208288	0.00246656	0.0030695	0.00208288	0.0021925	0.0030695	0.002631	0.00290506	0.003508	0.00361763	0.00235694	0.00339838	0.00328875	0.00383688	0.00405613	0.00460425	0.00630344	0.006139	0.00581013	0.00679676	0.00586494	0.00942776	0.00778338	0.0105788	0.0138128	0.0173208	0.019897	0.028667	0.0560184	0.0924688	0.00199055	0.00282983	0.00302499	0.00388922	0.00496767	0.00737997	0.16082	0.97655	0.22657
TCGA-YL-A8SJ	0.0018409	0.0020224	0.00140012	0.00129641	0.00132234	0.00186683	0.00199647	0.0022039	0.00142605	0.00215204	0.00199647	0.00222983	0.00272246	0.00256689	0.00290396	0.00186683	0.00230761	0.00290396	0.00316324	0.00378552	0.00503008	0.00448558	0.00598942	0.00534122	0.00764883	0.0066117	0.00783033	0.0114084	0.0158162	0.0182275	0.0265764	0.0471894	0.0696173	0.000864877	0.00222083	0.00218045	0.00221287	0.00274083	0.00424364	0.105916	0.988586	0.132442
TCGA-YL-A8SK	0.00608903	0.00552912	0.00720885	0.00601904	0.00601904	0.00734882	0.00629899	0.00797872	0.00566909	0.00615901	0.00643897	0.00804871	0.00762878	0.00657895	0.00650896	0.00517917	0.00615901	0.00734882	0.0074888	0.00790873	0.00853863	0.00902856	0.00853863	0.00783875	0.0112682	0.00909854	0.00965845	0.0131579	0.0174272	0.0150476	0.0214166	0.0359043	0.0488522	0.00409017	0.009357	0.00989169	0.0115877	0.00827276	0.0123415	0.0911501	0.986719	0.262027
TCGA-YL-A8SL	0.004418	0.00456527	0.00344604	0.00344604	0.00362276	0.00409402	0.00382893	0.0048009	0.00374057	0.0043591	0.00412347	0.00518379	0.00553723	0.0043591	0.00477144	0.00412347	0.00438855	0.00550778	0.00559614	0.00674482	0.00765787	0.00627356	0.00842366	0.00645028	0.00942507	0.00827639	0.00951343	0.0113984	0.0155219	0.0147561	0.0234449	0.0425306	0.0653864	0.00403703	0.00560294	0.00570575	0.00594139	0.00625993	0.00833059	0.111482	0.986568	0.198853
TCGA-YL-A8SO	0.00575622	0.00748309	0.00575622	0.00575622	0.00532451	0.00690747	0.00618794	0.0050367	0.00590013	0.00849043	0.00863434	0.00992949	0.0100734	0.007627	0.00949777	0.00935386	0.00892215	0.00964168	0.00733919	0.0132393	0.0155418	0.0141027	0.0155418	0.016693	0.0215858	0.016693	0.0234566	0.0270543	0.0408692	0.0368398	0.0538207	0.0733919	0.0677795	0.0170075	0.0183422	0.0211214	0.0149535	0.0255221	0.0403992	0.255754	0.799299	0.743607
TCGA-YL-A8SP	0.00551133	0.00551133	0.00530721	0.00489896	0.00591958	0.00520514	0.00673607	0.00571545	0.0047969	0.00571545	0.00847112	0.0074505	0.00806287	0.00683813	0.0102062	0.00602164	0.00796081	0.0109206	0.0117371	0.0147989	0.0156154	0.0136763	0.0186773	0.0194938	0.0237804	0.0206165	0.0216371	0.0307206	0.0437844	0.0415391	0.0537865	0.0793019	0.0734844	0.011088	0.0200696	0.0150522	0.0199976	0.026294	0.0373715	0.294098	0.730752	0.897197
TCGA-YL-A8SQ	0.0038117	0.0051458	0.00362112	0.00457404	0.00247761	0.00571755	0.00400229	0.00323995	0.00304936	0.00667048	0.00647989	0.00476463	0.00609872	0.00419287	0.00609872	0.00571755	0.00686106	0.00838574	0.00667048	0.00819516	0.0116257	0.010101	0.013341	0.010101	0.0169621	0.0146751	0.0186773	0.0232514	0.0377358	0.0392605	0.0596531	0.0909091	0.109015	0.00834995	0.0146189	0.00877133	0.0134012	0.0093393	0.0223996	0.326763	0.837474	0.787403
TCGA-YL-A8SR	0.00448065	0.00244399	0.00407332	0.00610998	0.00427699	0.00570265	0.00610998	0.00427699	0.00285132	0.00529532	0.00488798	0.00672098	0.00672098	0.00570265	0.00509165	0.00753564	0.00672098	0.00916497	0.00672098	0.0105906	0.01222	0.0095723	0.010387	0.01222	0.014053	0.0148676	0.0175153	0.0207739	0.0293279	0.0301426	0.0484725	0.087169	0.142159	0.00579247	0.0151443	0.00694116	0.0150901	0.0188965	0.0235518	0.430286	0.806941	0.681621
TCGA-YL-A9WH	0.00323258	0.00323258	0.00420236	0.00290933	0.00226281	0.00517214	0.00517214	0.00436399	0.00468725	0.00501051	0.00581865	0.00339421	0.00549539	0.00517214	0.00533376	0.00323258	0.00646517	0.00695006	0.00565702	0.0111524	0.0108292	0.0105059	0.0134152	0.00856635	0.0148699	0.0145466	0.0181025	0.023113	0.0286084	0.0332956	0.0525295	0.0846937	0.115242	0.00694796	0.00953682	0.00999095	0.0117652	0.00861307	0.0187342	0.316327	0.876666	0.607442
TCGA-YL-A9WI	0.00326714	0.00294683	0.00227418	0.00256246	0.00275464	0.00403587	0.00317104	0.00256246	0.00323511	0.00352338	0.00432415	0.004164	0.00474055	0.00413197	0.00470852	0.00365151	0.00461243	0.00605381	0.00592569	0.0070788	0.00848815	0.0070788	0.0105381	0.00832799	0.0113709	0.00983344	0.0134849	0.0162076	0.0241832	0.0246316	0.0369315	0.0584881	0.0865791	0.00292923	0.00665762	0.00404679	0.00669879	0.00612445	0.00923174	0.172357	0.96623	0.414097
TCGA-YL-A9WJ	0.00107296	0.00214592	0.00193133	0.0027897	0.00107296	0.00214592	0.00257511	0.00236052	0.00300429	0.00386266	0.00171674	0.00407725	0.00429185	0.00386266	0.00386266	0.0027897	0.00386266	0.00450644	0.00622318	0.00665236	0.00536481	0.00622318	0.00729614	0.00793991	0.0126609	0.00858369	0.0128755	0.0227468	0.0296137	0.0300429	0.0603004	0.0984979	0.153433	0.00492481	0.00751092	0.00321897	0.00641485	0.00589085	0.0110659	0.374744	0.861648	0.69733
TCGA-YL-A9WK	0.00624888	0.00651669	0.00446349	0.00669523	0.00553473	0.00669523	0.00651669	0.00580254	0.00553473	0.00633815	0.0067845	0.00669523	0.00732012	0.00687377	0.00633815	0.00749866	0.00758793	0.0106231	0.00776647	0.00937333	0.0124085	0.0116943	0.0123192	0.0105338	0.0155329	0.0139261	0.0183003	0.0246385	0.0295483	0.0295483	0.0465096	0.0797179	0.101053	0.00630697	0.0151778	0.0160211	0.0210048	0.0165534	0.0218095	0.310832	0.862202	0.421704
TCGA-YL-A9WL	0.00431801	0.00457201	0.00330201	0.00508001	0.00457201	0.00609601	0.00736601	0.00457201	0.00558801	0.00609601	0.00635001	0.00558801	0.00762002	0.00558801	0.00965202	0.00558801	0.00838202	0.00939802	0.00558801	0.012954	0.011684	0.01016	0.016764	0.012446	0.015748	0.01397	0.013716	0.018542	0.021336	0.02159	0.0358141	0.0685801	0.0988062	0.0053863	0.0138624	0.0132023	0.010524	0.0105429	0.0213961	0.25086	0.927344	0.515982
TCGA-YL-A9WX	0.0055325	0.00968188	0.00587828	0.00622407	0.00449516	0.00484094	0.00691563	0.00656985	0.0038036	0.00795297	0.00760719	0.00691563	0.00622407	0.0038036	0.00691563	0.00968188	0.0100277	0.00899032	0.00864454	0.011065	0.0134855	0.0124481	0.0131397	0.0134855	0.0152144	0.0217842	0.0193638	0.0259336	0.0297372	0.0266252	0.0373444	0.0653527	0.0757261	0.0115875	0.0134264	0.0144592	0.0195529	0.019588	0.0314471	0.220965	0.910094	0.465054
TCGA-YL-A9WY	0.00379387	0.00363579	0.00316156	0.00521657	0.00347771	0.00458426	0.0042681	0.00363579	0.00411002	0.00347771	0.00411002	0.00411002	0.00411002	0.00379387	0.00490041	0.00521657	0.00505849	0.00490041	0.00600696	0.00758773	0.0110654	0.00758773	0.0109074	0.00885236	0.0110654	0.0112235	0.0147012	0.0164401	0.0254505	0.0292444	0.0490041	0.0834651	0.131679	0.00280419	0.0102118	0.00706969	0.00704435	0.00940934	0.013502	0.319621	0.900158	0.795539
