# Supplementary figures and images for: Multimodal deep learning model for predicting homologous recombination deficiency in prostate cancer: an international multi-cohort study
Source: Research Square preprint supplement (doi:10.21203/rs.3.rs-6488233/v1), 2025-05-07

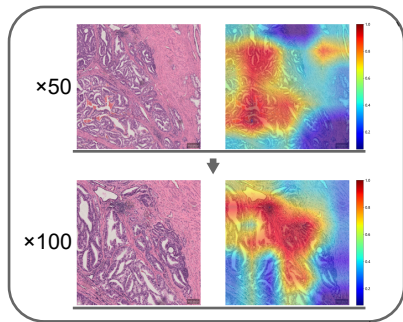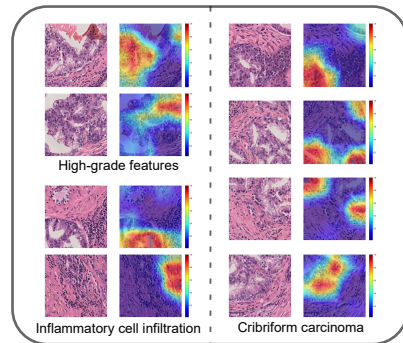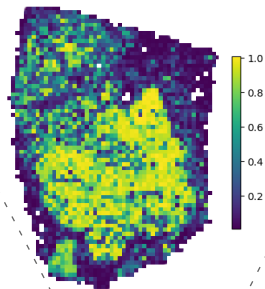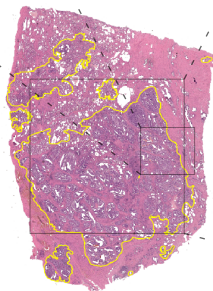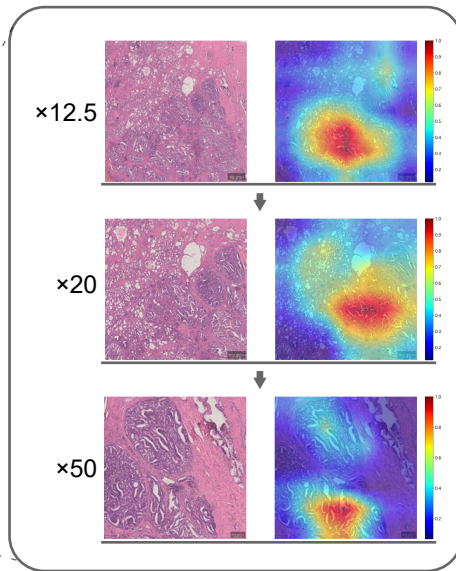

Supplement: Supplementary file 1 [file c673419cf8f3cbc30d23a227.pdf]
